# Supplementary material
Source: publisher figshare collection journal article supplement (https://acs.figshare.com/ndownloader/files/5844993)
Supplement: Supplementary file 1 [file 5844993]

 
data_sd-40
_publ_requested_journal          'Dalton Trans.'
_publ_contact_author_name        'Rupam Dinda'
_publ_contact_author_address     
'Department of Chemistry, National Institute of Technology, Rourkela 769008, Odisha, India.'
_publ_contact_author_email       rupamdinda@nitrkl.ac.in
_publ_contact_author_phone       rupamdinda@nitrkl.ac
loop_
_publ_author_name
_publ_author_address
'Bhakat, Saswati'
'Department of Chemistry, National Institute of Technology, Rourkela 769008, Odisha, India.'
'Dinda, Rupam'
'Department of Chemistry, National Institute of Technology, Rourkela 769008, Odisha, India.'
'Crochet, Aurelien'
"Department of Chemistry, Chemin du Mus\'ee 9, CH-1700 FRIBOURG, Switzerland."
'Fromm, Katharina M.'
"Department of Chemistry, Chemin du Mus\'ee 9, CH-1700 FRIBOURG, Switzerland."
'Patil, Yogesh P.'
'Department of Inorganic and Physical Chemistry, Indian Institute of Science, Bangalore 560012, India.'
'Bhutia, Sujit K.'
'Department of Life Science, National Institute of Technology, Rourkela 769008, Odisha, India.'
'Acharyya, Rama'
'Department of Life Science, National Institute of Technology, Rourkela 769008, Odisha, India.'

_audit_creation_method           SHELXL-2013
_chemical_name_systematic        
;oxovandium {(Z)-N-((E)-1-(2-oxidonaphthalen-1-yl)ethylidene)benzohydrazonate}
ethanoate
;
_chemical_name_common            ?
_chemical_formula_moiety         '(C19 H14 N2 O2)(C2 H5 O)O V'
_chemical_formula_sum            'C21 H19 N2 O4 V'
_chemical_melting_point          ?

_exptl_crystal_description       block
_exptl_crystal_colour            black

_diffrn_ambient_temperature      200(2)
_chemical_formula_weight         414.32

loop_
_atom_type_symbol
_atom_type_description
_atom_type_scat_dispersion_real
_atom_type_scat_dispersion_imag
_atom_type_scat_source
C C 0.0033 0.0016 'International Tables Vol C Tables 4.2.6.8 and 6.1.1.4'
H H 0.0000 0.0000 'International Tables Vol C Tables 4.2.6.8 and 6.1.1.4'
N N 0.0061 0.0033 'International Tables Vol C Tables 4.2.6.8 and 6.1.1.4'
O O 0.0106 0.0060 'International Tables Vol C Tables 4.2.6.8 and 6.1.1.4'
V V 0.3005 0.5294 'International Tables Vol C Tables 4.2.6.8 and 6.1.1.4'

_space_group_crystal_system      monoclinic
_space_group_IT_number           14
_space_group_name_H-M_alt        'P 21/n'
_space_group_name_Hall           '-P 2yn'

_shelx_space_group_comment       
;
The symmetry employed for this shelxl refinement is uniquely defined
by the following loop, which should always be used as a source of
symmetry information in preference to the above space-group names.
They are only intended as comments.
;

loop_
_space_group_symop_operation_xyz
'x, y, z'
'-x+1/2, y+1/2, -z+1/2'
'-x, -y, -z'
'x-1/2, -y-1/2, z-1/2'

_cell_length_a                   10.0073(19)
_cell_length_b                   15.0465(18)
_cell_length_c                   13.023(2)
_cell_angle_alpha                90
_cell_angle_beta                 91.581(15)
_cell_angle_gamma                90
_cell_volume                     1960.2(6)
_cell_formula_units_Z            4
_cell_measurement_temperature    200(2)
_cell_measurement_reflns_used    13941
_cell_measurement_theta_min      1.35
_cell_measurement_theta_max      25.55
_exptl_crystal_density_meas      ?
_exptl_crystal_density_method    ?
_exptl_crystal_density_diffrn    1.404
_exptl_crystal_F_000             856
_exptl_transmission_factor_min   ?
_exptl_transmission_factor_max   ?
_exptl_crystal_size_max          0.520
_exptl_crystal_size_mid          0.367
_exptl_crystal_size_min          0.250
_exptl_absorpt_coefficient_mu    0.535
_shelx_estimated_absorpt_T_min   ?
_shelx_estimated_absorpt_T_max   ?
_exptl_absorpt_correction_type   integration
_exptl_absorpt_correction_T_min  0.7475
_exptl_absorpt_correction_T_max  0.9044
_exptl_absorpt_process_details  
;
Stoe & Cie (2002). X-SHAPE. Stoe & Cie, Darmstadt, Germany
;
_exptl_special_details           
;
 ?
;
_diffrn_radiation_probe          x-ray
_diffrn_radiation_type           MoK\a
_diffrn_radiation_wavelength     0.71073
_diffrn_source                   'fine-focus sealed tube'
_diffrn_radiation_monochromator  graphite
_diffrn_measurement_device_type  'STOE IPDS 2'
_diffrn_measurement_method       'rotation method'
_diffrn_detector_area_resol_mean 6.67
_diffrn_standards_number         ?
_diffrn_standards_interval_count ?
_diffrn_standards_interval_time  ?
_diffrn_standards_decay_%        ?
_diffrn_reflns_number             24699
_diffrn_reflns_av_unetI/netI      0.0359
_diffrn_reflns_av_R_equivalents   0.0843
_diffrn_reflns_limit_h_min        -11
_diffrn_reflns_limit_h_max        11
_diffrn_reflns_limit_k_min        -17
_diffrn_reflns_limit_k_max        17
_diffrn_reflns_limit_l_min        -14
_diffrn_reflns_limit_l_max        15
_diffrn_reflns_theta_min          2.069
_diffrn_reflns_theta_max          25.000
_diffrn_reflns_theta_full         25.000
_diffrn_measured_fraction_theta_max   1.000
_diffrn_measured_fraction_theta_full  1.000
_diffrn_reflns_Laue_measured_fraction_max    1.000
_diffrn_reflns_Laue_measured_fraction_full   1.000
_diffrn_reflns_point_group_measured_fraction_max   1.000
_diffrn_reflns_point_group_measured_fraction_full  1.000
_reflns_number_total              3452
_reflns_number_gt                 2671
_reflns_threshold_expression      'I > 2\s(I)'
_reflns_Friedel_coverage          0.000
_reflns_Friedel_fraction_max      .
_reflns_Friedel_fraction_full     .
 
_reflns_special_details          
;
 Reflections were merged by SHELXL according to the crystal
 class for the calculation of statistics and refinement.
 
 _reflns_Friedel_fraction is defined as the number of unique
 Friedel pairs measured divided by the number that would be
 possible theoretically, ignoring centric projections and
 systematic absences.
;

_computing_data_collection       'X-Area (Stoe & Cie, 2009)'
_computing_cell_refinement       'X-Area (Stoe & Cie, 2009)'
_computing_data_reduction        'X-RED32(Stoe & Cie, 2009)'
_computing_structure_solution    'SHELXS-97 (Sheldrick, 2008)'
_computing_structure_refinement  'SHELXL-97 (Sheldrick, 2008)'

_refine_special_details          
;
 ?
;
_refine_ls_structure_factor_coef  Fsqd
_refine_ls_matrix_type            full
_refine_ls_weighting_scheme       calc
_refine_ls_weighting_details
'w=1/[\s^2^(Fo^2^)+(0.0513P)^2^+0.4363P] where P=(Fo^2^+2Fc^2^)/3'
_atom_sites_solution_primary      ?
_atom_sites_solution_secondary    ?
_atom_sites_solution_hydrogens    geom
_refine_ls_hydrogen_treatment     constr
_refine_ls_extinction_method      none
_refine_ls_extinction_coef        .
_refine_ls_number_reflns          3452
_refine_ls_number_parameters      255
_refine_ls_number_restraints      48
_refine_ls_R_factor_all           0.0512
_refine_ls_R_factor_gt            0.0382
_refine_ls_wR_factor_ref          0.1091
_refine_ls_wR_factor_gt           0.1034
_refine_ls_goodness_of_fit_ref    1.043
_refine_ls_restrained_S_all       1.038
_refine_ls_shift/su_max           0.000
_refine_ls_shift/su_mean          0.000
 
loop_
 _atom_site_label
 _atom_site_type_symbol
 _atom_site_fract_x
 _atom_site_fract_y
 _atom_site_fract_z
 _atom_site_U_iso_or_equiv
 _atom_site_adp_type
 _atom_site_occupancy
 _atom_site_site_symmetry_order  
 _atom_site_calc_flag
 _atom_site_refinement_flags_posn
 _atom_site_refinement_flags_adp
 _atom_site_refinement_flags_occupancy
 _atom_site_disorder_assembly
 _atom_site_disorder_group
C1 C 0.8112(2) 0.47476(13) 0.50903(18) 0.0502(5) Uani 1 1 d . . . . .
C2 C 0.7499(2) 0.46067(15) 0.41141(19) 0.0593(6) Uani 1 1 d . . . . .
H2 H 0.7784 0.4128 0.3697 0.071 Uiso 1 1 calc R U . . .
C3 C 0.6511(2) 0.51509(15) 0.37714(18) 0.0597(6) Uani 1 1 d . . . . .
H3 H 0.6120 0.5060 0.3107 0.072 Uiso 1 1 calc R U . . .
C4 C 0.6050(2) 0.58532(14) 0.43881(17) 0.0510(5) Uani 1 1 d . . . . .
C5 C 0.4975(2) 0.63913(16) 0.4044(2) 0.0623(6) Uani 1 1 d . . . . .
H5 H 0.4572 0.6284 0.3386 0.075 Uiso 1 1 calc R U . . .
C6 C 0.4504(3) 0.70571(17) 0.4630(2) 0.0679(7) Uani 1 1 d . . . . .
H6 H 0.3798 0.7426 0.4376 0.081 Uiso 1 1 calc R U . . .
C7 C 0.5063(2) 0.71997(16) 0.5614(2) 0.0640(6) Uani 1 1 d . . . . .
H7 H 0.4719 0.7658 0.6033 0.077 Uiso 1 1 calc R U . . .
C8 C 0.6098(2) 0.66870(14) 0.59771(18) 0.0547(5) Uani 1 1 d . . . . .
H8 H 0.6443 0.6783 0.6655 0.066 Uiso 1 1 calc R U . . .
C9 C 0.6667(2) 0.60180(13) 0.53674(16) 0.0456(5) Uani 1 1 d . . . . .
C10 C 0.7788(2) 0.54731(12) 0.56970(16) 0.0457(5) Uani 1 1 d . . . . .
C11 C 0.8665(2) 0.57054(13) 0.65676(17) 0.0480(5) Uani 1 1 d . . . . .
C12 C 1.0806(2) 0.46531(15) 0.82007(19) 0.0577(6) Uani 1 1 d . . . . .
C13 C 1.1685(2) 0.47179(16) 0.9127(2) 0.0648(7) Uani 1 1 d . U . . .
C14 C 1.2557(3) 0.4028(2) 0.9366(3) 0.0958(11) Uani 1 1 d . U . . .
H14 H 1.2609 0.3523 0.8930 0.115 Uiso 1 1 calc R U . . .
C15 C 1.3361(4) 0.4087(3) 1.0263(4) 0.1206(15) Uani 1 1 d . U . . .
H15 H 1.3950 0.3614 1.0445 0.145 Uiso 1 1 calc R U . . .
C16 C 1.3301(4) 0.4824(3) 1.0879(3) 0.1153(14) Uani 1 1 d . U . . .
H16 H 1.3862 0.4863 1.1477 0.138 Uiso 1 1 calc R U . . .
C17 C 1.2450(3) 0.5498(3) 1.0644(2) 0.0957(10) Uani 1 1 d . U . . .
H17 H 1.2413 0.6005 1.1078 0.115 Uiso 1 1 calc R U . . .
C18 C 1.1636(3) 0.54473(19) 0.9771(2) 0.0728(7) Uani 1 1 d . U . . .
H18 H 1.1034 0.5919 0.9612 0.087 Uiso 1 1 calc R U . . .
C19 C 1.1457(3) 0.2493(2) 0.6172(2) 0.0872(9) Uani 1 1 d . . . . .
H19A H 1.2005 0.3041 0.6179 0.105 Uiso 1 1 calc R U . . .
H19B H 1.1524 0.2213 0.5487 0.105 Uiso 1 1 calc R U . . .
C20 C 1.1958(4) 0.1896(3) 0.6941(3) 0.147(2) Uani 1 1 d . . . . .
H20A H 1.1830 0.2155 0.7622 0.221 Uiso 1 1 calc R U . . .
H20B H 1.2913 0.1792 0.6843 0.221 Uiso 1 1 calc R U . . .
H20C H 1.1475 0.1330 0.6887 0.221 Uiso 1 1 calc R U . . .
C21 C 0.8936(3) 0.66513(14) 0.6864(2) 0.0634(6) Uani 1 1 d . . . . .
H21A H 0.9903 0.6743 0.6946 0.095 Uiso 1 1 calc R U . . .
H21B H 0.8506 0.6782 0.7514 0.095 Uiso 1 1 calc R U . . .
H21C H 0.8577 0.7047 0.6327 0.095 Uiso 1 1 calc R U . . .
N1 N 0.93265(17) 0.50766(11) 0.70487(14) 0.0493(4) Uani 1 1 d . . . . .
N2 N 1.01648(18) 0.53428(11) 0.78658(14) 0.0542(5) Uani 1 1 d . . . . .
O1 O 0.90714(15) 0.41704(9) 0.53707(13) 0.0599(4) Uani 1 1 d . . . . .
O2 O 1.06860(17) 0.38755(10) 0.77435(15) 0.0677(5) Uani 1 1 d . . . . .
O3 O 0.79689(18) 0.34671(11) 0.71257(15) 0.0760(5) Uani 1 1 d . . . . .
O4 O 1.0115(2) 0.27119(11) 0.63473(17) 0.0873(7) Uani 1 1 d . . . . .
V1 V 0.93711(4) 0.37254(2) 0.66690(4) 0.06198(17) Uani 1 1 d . . . . .
 
loop_
 _atom_site_aniso_label
 _atom_site_aniso_U_11
 _atom_site_aniso_U_22
 _atom_site_aniso_U_33
 _atom_site_aniso_U_23
 _atom_site_aniso_U_13
 _atom_site_aniso_U_12
C1 0.0500(12) 0.0440(10) 0.0564(13) -0.0016(9) -0.0044(10) 0.0001(9)
C2 0.0643(14) 0.0555(12) 0.0577(14) -0.0145(11) -0.0058(12) 0.0006(10)
C3 0.0644(14) 0.0642(13) 0.0496(13) -0.0058(11) -0.0122(11) -0.0026(11)
C4 0.0506(12) 0.0498(11) 0.0520(13) 0.0016(10) -0.0060(10) -0.0032(9)
C5 0.0565(14) 0.0674(14) 0.0618(15) 0.0051(12) -0.0165(12) 0.0014(11)
C6 0.0594(14) 0.0658(14) 0.0776(17) 0.0067(13) -0.0139(13) 0.0125(12)
C7 0.0620(14) 0.0561(13) 0.0737(17) -0.0034(12) -0.0036(12) 0.0108(11)
C8 0.0566(13) 0.0531(12) 0.0541(13) -0.0035(10) -0.0065(10) 0.0023(10)
C9 0.0464(11) 0.0413(10) 0.0488(12) 0.0011(8) -0.0045(9) -0.0016(8)
C10 0.0490(11) 0.0409(10) 0.0468(12) 0.0017(9) -0.0069(9) -0.0010(8)
C11 0.0495(12) 0.0429(10) 0.0513(12) -0.0003(9) -0.0058(10) 0.0007(9)
C12 0.0514(12) 0.0534(12) 0.0673(15) 0.0109(11) -0.0138(11) -0.0106(10)
C13 0.0546(14) 0.0661(14) 0.0727(16) 0.0234(12) -0.0180(12) -0.0156(11)
C14 0.0778(19) 0.0781(17) 0.129(3) 0.0240(18) -0.051(2) -0.0131(15)
C15 0.095(2) 0.108(2) 0.155(4) 0.052(2) -0.068(3) -0.012(2)
C16 0.100(3) 0.140(3) 0.102(3) 0.031(2) -0.052(2) -0.037(2)
C17 0.088(2) 0.130(3) 0.0683(19) 0.0106(18) -0.0203(17) -0.0320(19)
C18 0.0683(16) 0.0874(18) 0.0621(16) 0.0089(14) -0.0115(13) -0.0188(13)
C19 0.086(2) 0.091(2) 0.085(2) 0.0085(16) 0.0075(17) -0.0066(17)
C20 0.151(4) 0.207(5) 0.084(2) 0.027(3) 0.013(2) 0.125(4)
C21 0.0726(16) 0.0430(11) 0.0732(16) -0.0066(11) -0.0225(13) 0.0011(10)
N1 0.0486(10) 0.0453(9) 0.0534(10) 0.0016(8) -0.0126(8) -0.0030(7)
N2 0.0548(11) 0.0507(10) 0.0562(11) 0.0045(8) -0.0155(9) -0.0047(8)
O1 0.0601(10) 0.0480(8) 0.0710(11) -0.0085(7) -0.0099(8) 0.0093(7)
O2 0.0634(10) 0.0470(8) 0.0911(13) 0.0090(8) -0.0283(9) -0.0023(7)
O3 0.0665(11) 0.0640(10) 0.0962(14) 0.0128(9) -0.0227(10) -0.0204(8)
O4 0.0875(14) 0.0493(9) 0.1226(17) -0.0114(10) -0.0423(12) 0.0162(9)
V1 0.0608(3) 0.0395(2) 0.0842(3) 0.00182(18) -0.0245(2) -0.00047(16)
 
_geom_special_details
;
 All esds (except the esd in the dihedral angle between two l.s. planes)
 are estimated using the full covariance matrix.  The cell esds are taken
 into account individually in the estimation of esds in distances, angles
 and torsion angles; correlations between esds in cell parameters are only
 used when they are defined by crystal symmetry.  An approximate (isotropic)
 treatment of cell esds is used for estimating esds involving l.s. planes.
;
 
loop_
 _geom_bond_atom_site_label_1
 _geom_bond_atom_site_label_2
 _geom_bond_distance
 _geom_bond_site_symmetry_2
 _geom_bond_publ_flag
C1 O1 1.338(2) . ?
C1 C10 1.391(3) . ?
C1 C2 1.412(3) . ?
C2 C3 1.351(3) . ?
C2 H2 0.9500 . ?
C3 C4 1.412(3) . ?
C3 H3 0.9500 . ?
C4 C5 1.410(3) . ?
C4 C9 1.423(3) . ?
C5 C6 1.352(3) . ?
C5 H5 0.9500 . ?
C6 C7 1.401(4) . ?
C6 H6 0.9500 . ?
C7 C8 1.365(3) . ?
C7 H7 0.9500 . ?
C8 C9 1.412(3) . ?
C8 H8 0.9500 . ?
C9 C10 1.445(3) . ?
C10 C11 1.457(3) . ?
C11 N1 1.305(3) . ?
C11 C21 1.498(3) . ?
C12 N2 1.290(3) . ?
C12 O2 1.317(3) . ?
C12 C13 1.477(3) . ?
C13 C18 1.383(4) . ?
C13 C14 1.386(4) . ?
C14 C15 1.403(5) . ?
C14 H14 0.9500 . ?
C15 C16 1.370(6) . ?
C15 H15 0.9500 . ?
C16 C17 1.354(5) . ?
C16 H16 0.9500 . ?
C17 C18 1.382(4) . ?
C17 H17 0.9500 . ?
C18 H18 0.9500 . ?
C19 O4 1.408(4) . ?
C19 C20 1.426(4) . ?
C19 H19A 0.9900 . ?
C19 H19B 0.9900 . ?
C20 H20A 0.9800 . ?
C20 H20B 0.9800 . ?
C20 H20C 0.9800 . ?
C21 H21A 0.9800 . ?
C21 H21B 0.9800 . ?
C21 H21C 0.9800 . ?
N1 N2 1.395(2) . ?
N1 V1 2.0930(17) . ?
O1 V1 1.8354(17) . ?
O2 V1 1.9076(16) . ?
O3 V1 1.5875(19) . ?
O4 V1 1.7527(17) . ?
 
loop_
 _geom_angle_atom_site_label_1
 _geom_angle_atom_site_label_2
 _geom_angle_atom_site_label_3
 _geom_angle
 _geom_angle_site_symmetry_1
 _geom_angle_site_symmetry_3
 _geom_angle_publ_flag
O1 C1 C10 122.08(19) . . ?
O1 C1 C2 116.01(19) . . ?
C10 C1 C2 121.81(19) . . ?
C3 C2 C1 120.1(2) . . ?
C3 C2 H2 119.9 . . ?
C1 C2 H2 119.9 . . ?
C2 C3 C4 120.9(2) . . ?
C2 C3 H3 119.6 . . ?
C4 C3 H3 119.6 . . ?
C5 C4 C3 120.5(2) . . ?
C5 C4 C9 119.5(2) . . ?
C3 C4 C9 119.99(19) . . ?
C6 C5 C4 121.4(2) . . ?
C6 C5 H5 119.3 . . ?
C4 C5 H5 119.3 . . ?
C5 C6 C7 119.6(2) . . ?
C5 C6 H6 120.2 . . ?
C7 C6 H6 120.2 . . ?
C8 C7 C6 120.7(2) . . ?
C8 C7 H7 119.7 . . ?
C6 C7 H7 119.7 . . ?
C7 C8 C9 121.5(2) . . ?
C7 C8 H8 119.3 . . ?
C9 C8 H8 119.3 . . ?
C8 C9 C4 117.18(19) . . ?
C8 C9 C10 124.01(19) . . ?
C4 C9 C10 118.75(19) . . ?
C1 C10 C9 117.88(18) . . ?
C1 C10 C11 119.04(18) . . ?
C9 C10 C11 122.76(18) . . ?
N1 C11 C10 119.10(18) . . ?
N1 C11 C21 118.64(18) . . ?
C10 C11 C21 121.98(18) . . ?
N2 C12 O2 121.6(2) . . ?
N2 C12 C13 120.2(2) . . ?
O2 C12 C13 118.2(2) . . ?
C18 C13 C14 119.4(3) . . ?
C18 C13 C12 121.2(2) . . ?
C14 C13 C12 119.4(3) . . ?
C13 C14 C15 118.8(3) . . ?
C13 C14 H14 120.6 . . ?
C15 C14 H14 120.6 . . ?
C16 C15 C14 120.4(3) . . ?
C16 C15 H15 119.8 . . ?
C14 C15 H15 119.8 . . ?
C17 C16 C15 120.8(3) . . ?
C17 C16 H16 119.6 . . ?
C15 C16 H16 119.6 . . ?
C16 C17 C18 119.8(4) . . ?
C16 C17 H17 120.1 . . ?
C18 C17 H17 120.1 . . ?
C17 C18 C13 120.8(3) . . ?
C17 C18 H18 119.6 . . ?
C13 C18 H18 119.6 . . ?
O4 C19 C20 110.6(3) . . ?
O4 C19 H19A 109.5 . . ?
C20 C19 H19A 109.5 . . ?
O4 C19 H19B 109.5 . . ?
C20 C19 H19B 109.5 . . ?
H19A C19 H19B 108.1 . . ?
C19 C20 H20A 109.5 . . ?
C19 C20 H20B 109.5 . . ?
H20A C20 H20B 109.5 . . ?
C19 C20 H20C 109.5 . . ?
H20A C20 H20C 109.5 . . ?
H20B C20 H20C 109.5 . . ?
C11 C21 H21A 109.5 . . ?
C11 C21 H21B 109.5 . . ?
H21A C21 H21B 109.5 . . ?
C11 C21 H21C 109.5 . . ?
H21A C21 H21C 109.5 . . ?
H21B C21 H21C 109.5 . . ?
C11 N1 N2 116.37(17) . . ?
C11 N1 V1 127.20(14) . . ?
N2 N1 V1 116.28(12) . . ?
C12 N2 N1 108.04(17) . . ?
C1 O1 V1 125.87(15) . . ?
C12 O2 V1 119.29(14) . . ?
C19 O4 V1 130.97(18) . . ?
O3 V1 O4 105.18(10) . . ?
O3 V1 O1 108.10(9) . . ?
O4 V1 O1 99.03(9) . . ?
O3 V1 O2 110.68(9) . . ?
O4 V1 O2 89.40(8) . . ?
O1 V1 O2 136.42(8) . . ?
O3 V1 N1 97.15(9) . . ?
O4 V1 N1 156.01(9) . . ?
O1 V1 N1 81.91(7) . . ?
O2 V1 N1 74.37(6) . . ?
 
loop_
 _geom_torsion_atom_site_label_1
 _geom_torsion_atom_site_label_2
 _geom_torsion_atom_site_label_3
 _geom_torsion_atom_site_label_4
 _geom_torsion
 _geom_torsion_site_symmetry_1
 _geom_torsion_site_symmetry_2
 _geom_torsion_site_symmetry_3
 _geom_torsion_site_symmetry_4
 _geom_torsion_publ_flag
O1 C1 C2 C3 179.3(2) . . . . ?
C10 C1 C2 C3 -4.2(4) . . . . ?
C1 C2 C3 C4 -1.6(4) . . . . ?
C2 C3 C4 C5 -176.9(2) . . . . ?
C2 C3 C4 C9 2.6(4) . . . . ?
C3 C4 C5 C6 178.8(2) . . . . ?
C9 C4 C5 C6 -0.7(4) . . . . ?
C4 C5 C6 C7 -2.1(4) . . . . ?
C5 C6 C7 C8 1.5(4) . . . . ?
C6 C7 C8 C9 2.0(4) . . . . ?
C7 C8 C9 C4 -4.8(3) . . . . ?
C7 C8 C9 C10 178.0(2) . . . . ?
C5 C4 C9 C8 4.1(3) . . . . ?
C3 C4 C9 C8 -175.5(2) . . . . ?
C5 C4 C9 C10 -178.6(2) . . . . ?
C3 C4 C9 C10 1.9(3) . . . . ?
O1 C1 C10 C9 -175.2(2) . . . . ?
C2 C1 C10 C9 8.6(3) . . . . ?
O1 C1 C10 C11 11.2(3) . . . . ?
C2 C1 C10 C11 -165.1(2) . . . . ?
C8 C9 C10 C1 169.9(2) . . . . ?
C4 C9 C10 C1 -7.3(3) . . . . ?
C8 C9 C10 C11 -16.7(3) . . . . ?
C4 C9 C10 C11 166.1(2) . . . . ?
C1 C10 C11 N1 -30.9(3) . . . . ?
C9 C10 C11 N1 155.8(2) . . . . ?
C1 C10 C11 C21 142.9(2) . . . . ?
C9 C10 C11 C21 -30.4(3) . . . . ?
N2 C12 C13 C18 13.5(4) . . . . ?
O2 C12 C13 C18 -165.6(2) . . . . ?
N2 C12 C13 C14 -167.8(3) . . . . ?
O2 C12 C13 C14 13.2(4) . . . . ?
C18 C13 C14 C15 0.5(5) . . . . ?
C12 C13 C14 C15 -178.3(3) . . . . ?
C13 C14 C15 C16 -1.3(6) . . . . ?
C14 C15 C16 C17 1.3(6) . . . . ?
C15 C16 C17 C18 -0.3(6) . . . . ?
C16 C17 C18 C13 -0.5(5) . . . . ?
C14 C13 C18 C17 0.4(4) . . . . ?
C12 C13 C18 C17 179.2(3) . . . . ?
C10 C11 N1 N2 179.06(19) . . . . ?
C21 C11 N1 N2 5.0(3) . . . . ?
C10 C11 N1 V1 3.6(3) . . . . ?
C21 C11 N1 V1 -170.45(17) . . . . ?
O2 C12 N2 N1 4.4(3) . . . . ?
C13 C12 N2 N1 -174.6(2) . . . . ?
C11 N1 N2 C12 -175.4(2) . . . . ?
V1 N1 N2 C12 0.5(2) . . . . ?
C10 C1 O1 V1 41.6(3) . . . . ?
C2 C1 O1 V1 -141.95(18) . . . . ?
N2 C12 O2 V1 -8.0(3) . . . . ?
C13 C12 O2 V1 171.07(17) . . . . ?
C20 C19 O4 V1 114.5(3) . . . . ?
C19 O4 V1 O3 -161.0(3) . . . . ?
C19 O4 V1 O1 87.3(3) . . . . ?
C19 O4 V1 O2 -49.7(3) . . . . ?
C19 O4 V1 N1 -3.0(4) . . . . ?
C1 O1 V1 O3 43.78(18) . . . . ?
C1 O1 V1 O4 153.10(16) . . . . ?
C1 O1 V1 O2 -108.17(18) . . . . ?
C1 O1 V1 N1 -51.14(16) . . . . ?
 
_refine_diff_density_max    0.230
_refine_diff_density_min   -0.287
_refine_diff_density_rms    0.039

_shelxl_version_number 2013-4

_shelx_res_file
;
TITL SD-40
CELL  0.71073  10.0073  15.0465  13.0228   90.000   91.581   90.000
ZERR     4.00   0.0019   0.0018   0.0024    0.000    0.015    0.000
LATT   1
SYMM  1/2 - X, 1/2 + Y, 1/2 - Z
SFAC  C    H    N    O    V
UNIT  84   76   8    16   4
MERG   2
OMIT     0.00  50.00
DELU     0.010   0.010 C13 C18 C14 C15 C16 C17
SIMU     0.040   0.080   1.700 C13 C18 C14 C15 C16 C17
FMAP   2
PLAN    5
ACTA    50.00
BOND   $H
CONF
L.S.  50
TEMP   -73.00
WGHT    0.051300    0.436300
FVAR       0.41065
C1    1    0.811176    0.474759    0.509032    11.00000    0.04998    0.04395 =
         0.05637   -0.00161   -0.00444    0.00012
C2    1    0.749946    0.460670    0.411405    11.00000    0.06433    0.05550 =
         0.05775   -0.01451   -0.00583    0.00055
AFIX  43
H2    2    0.778355    0.412805    0.369735    11.00000   -1.20000
AFIX   0
C3    1    0.651089    0.515086    0.377137    11.00000    0.06444    0.06423 =
         0.04959   -0.00575   -0.01216   -0.00256
AFIX  43
H3    2    0.612006    0.506000    0.310657    11.00000   -1.20000
AFIX   0
C4    1    0.605031    0.585318    0.438808    11.00000    0.05058    0.04985 =
         0.05204    0.00161   -0.00601   -0.00323
C5    1    0.497458    0.639125    0.404383    11.00000    0.05651    0.06740 =
         0.06184    0.00510   -0.01650    0.00137
AFIX  43
H5    2    0.457226    0.628373    0.338629    11.00000   -1.20000
AFIX   0
C6    1    0.450384    0.705709    0.463023    11.00000    0.05942    0.06577 =
         0.07757    0.00675   -0.01395    0.01253
AFIX  43
H6    2    0.379832    0.742574    0.437648    11.00000   -1.20000
AFIX   0
C7    1    0.506331    0.719965    0.561427    11.00000    0.06202    0.05614 =
         0.07366   -0.00336   -0.00360    0.01079
AFIX  43
H7    2    0.471917    0.765793    0.603349    11.00000   -1.20000
AFIX   0
C8    1    0.609777    0.668697    0.597706    11.00000    0.05663    0.05309 =
         0.05408   -0.00347   -0.00650    0.00233
AFIX  43
H8    2    0.644267    0.678252    0.665503    11.00000   -1.20000
AFIX   0
C9    1    0.666659    0.601797    0.536745    11.00000    0.04637    0.04133 =
         0.04881    0.00107   -0.00452   -0.00157
C10   1    0.778792    0.547310    0.569700    11.00000    0.04896    0.04094 =
         0.04679    0.00166   -0.00689   -0.00099
C11   1    0.866513    0.570539    0.656759    11.00000    0.04948    0.04290 =
         0.05130   -0.00034   -0.00575    0.00070
C12   1    1.080580    0.465306    0.820074    11.00000    0.05138    0.05345 =
         0.06732    0.01086   -0.01384   -0.01059
C13   1    1.168490    0.471788    0.912724    11.00000    0.05458    0.06613 =
         0.07268    0.02343   -0.01800   -0.01560
C14   1    1.255690    0.402767    0.936592    11.00000    0.07777    0.07805 =
         0.12865    0.02398   -0.05101   -0.01314
AFIX  43
H14   2    1.260936    0.352340    0.892990    11.00000   -1.20000
AFIX   0
C15   1    1.336066    0.408747    1.026330    11.00000    0.09503    0.10801 =
         0.15496    0.05154   -0.06777   -0.01177
AFIX  43
H15   2    1.394980    0.361448    1.044523    11.00000   -1.20000
AFIX   0
C16   1    1.330053    0.482436    1.087876    11.00000    0.10019    0.14040 =
         0.10233    0.03143   -0.05177   -0.03676
AFIX  43
H16   2    1.386237    0.486263    1.147714    11.00000   -1.20000
AFIX   0
C17   1    1.244983    0.549834    1.064390    11.00000    0.08810    0.12957 =
         0.06831    0.01060   -0.02032   -0.03201
AFIX  43
H17   2    1.241256    0.600491    1.107759    11.00000   -1.20000
AFIX   0
C18   1    1.163565    0.544728    0.977129    11.00000    0.06827    0.08740 =
         0.06208    0.00886   -0.01146   -0.01877
AFIX  43
H18   2    1.103447    0.591926    0.961183    11.00000   -1.20000
AFIX   0
C19   1    1.145715    0.249269    0.617176    11.00000    0.08644    0.09061 =
         0.08481    0.00847    0.00745   -0.00657
AFIX  23
H19A  2    1.200518    0.304054    0.617854    11.00000   -1.20000
H19B  2    1.152412    0.221316    0.548691    11.00000   -1.20000
AFIX   0
C20   1    1.195768    0.189573    0.694147    11.00000    0.15114    0.20683 =
         0.08381    0.02656    0.01271    0.12464
AFIX 137
H20A  2    1.182957    0.215455    0.762226    11.00000   -1.50000
H20B  2    1.291256    0.179221    0.684347    11.00000   -1.50000
H20C  2    1.147479    0.133030    0.688747    11.00000   -1.50000
AFIX   0
C21   1    0.893618    0.665133    0.686421    11.00000    0.07262    0.04301 =
         0.07315   -0.00660   -0.02252    0.00106
AFIX 137
H21A  2    0.990274    0.674323    0.694604    11.00000   -1.50000
H21B  2    0.850613    0.678245    0.751404    11.00000   -1.50000
H21C  2    0.857702    0.704733    0.632664    11.00000   -1.50000
AFIX   0
N1    3    0.932648    0.507657    0.704875    11.00000    0.04859    0.04526 =
         0.05339    0.00157   -0.01257   -0.00297
N2    3    1.016480    0.534285    0.786585    11.00000    0.05475    0.05074 =
         0.05621    0.00454   -0.01548   -0.00472
O1    4    0.907137    0.417044    0.537068    11.00000    0.06007    0.04796 =
         0.07097   -0.00849   -0.00993    0.00926
O2    4    1.068601    0.387546    0.774350    11.00000    0.06335    0.04704 =
         0.09111    0.00897   -0.02829   -0.00227
O3    4    0.796890    0.346708    0.712567    11.00000    0.06655    0.06400 =
         0.09622    0.01284   -0.02272   -0.02044
O4    4    1.011454    0.271186    0.634732    11.00000    0.08754    0.04926 =
         0.12259   -0.01144   -0.04230    0.01621
V1    5    0.937113    0.372545    0.666897    11.00000    0.06084    0.03947 =
         0.08416    0.00182   -0.02447   -0.00047
HKLF    4

REM  SD-40
REM R1 =  0.0382 for    2671 Fo > 4sig(Fo)  and  0.0512 for all    3452 data
REM    255 parameters refined using     48 restraints

END

WGHT      0.0512      0.4357

REM Highest difference peak  0.230,  deepest hole -0.287,  1-sigma level  0.039
Q1    1   1.0886  0.3046  0.5960  11.00000  0.05    0.23
Q2    1   1.2079  0.4358  0.9186  11.00000  0.05    0.22
Q3    1   0.7440  0.5773  0.5425  11.00000  0.05    0.21
Q4    1   0.8191  0.5597  0.6068  11.00000  0.05    0.18
Q5    1   0.9450  0.4625  0.6940  11.00000  0.05    0.17
;
_shelx_res_checksum   16567

_shelx_hkl_file
;
   0 -12  -5   -1.04    1.21   0 0.94597-0.95131-0.27718-0.29066-0.14979-0.12122
   0 -12  -4   -1.63    1.32   0 0.94903-0.95337-0.27100-0.29675-0.14245-0.07394
   0 -12  -3    0.78    1.54   0 0.95077-0.95410-0.26737-0.29949-0.13815-0.02602
   0 -12  -2   24.83    1.77   0 0.95108-0.95386-0.26671-0.29734-0.13737 0.02401
   0 -12  -1    1.75    1.35   0 0.94837-0.94958-0.27234-0.29455-0.14405 0.08934
   0 -11  -6   -3.11    1.29   0 0.94837-0.95480-0.27234-0.24850-0.14405-0.18164
   0 -11  -5    7.06    1.64   0 0.95325-0.95869-0.26207-0.25501-0.13188-0.14466
   0 -11   0    0.24    1.66   0 0.95424-0.95434-0.25990-0.25971-0.12932 0.12934
   0 -10  -7   -6.70    1.37   0 0.94771-0.95550-0.27369-0.20039-0.14564-0.23495
   0 -10  -6   -0.97    1.56   0 0.95362-0.96088-0.26126-0.21321-0.13092-0.19538
   0 -10   1  506.09    4.53   0 0.95679-0.95699-0.25417-0.21627-0.12256 0.17505
   0  -9  -7   54.18    1.87   0 0.95325-0.95859-0.26207-0.15933-0.13188-0.25455
   0  -9   2  223.54    3.66   0 0.95335-0.95303-0.26185-0.16156-0.13162 0.23784
   0  -8  -8   -2.19    1.17   0 0.94758-0.95668-0.27396-0.10602-0.14596-0.28959
   0  -7  -8   -1.21    1.17   0 0.94968-0.95894-0.26965-0.06323-0.14085-0.29493
   0  -6  -8    0.35    1.22   0 0.95084-0.96002-0.26722-0.01839-0.13797-0.29778
   0  -5  -8    0.48    1.14   0 0.95071-0.95918-0.26749 0.03134-0.13829-0.29949
   0  -4  -8   -2.75    1.41   0 0.94890-0.95816-0.27126 0.08005-0.14277-0.29320
   0  -2  -7  -11.47    2.01   0 0.95212-0.95942-0.26451 0.16806-0.13477-0.24480
   0  -1  -6    1.65    1.82   0 0.95366-0.96021-0.26116 0.21394-0.13081-0.19789
   0   0  -5   -1.07    1.91   0 0.95218-0.95772-0.26438 0.26212-0.13461-0.13677
   1 -15  -6   -5.15    1.55   0 0.94864-0.88409-0.27180-0.43771-0.14341-0.18092
   1 -15  -5    7.52    1.86   0 0.95324-0.88722-0.26209-0.44445-0.13190-0.14108
   1 -15  -4    0.16    1.62   0 0.95448-0.88903-0.25936-0.45257-0.12868-0.08707
   1 -15  -1    8.47    1.61   0 0.95643-0.88812-0.25500-0.45163-0.12354 0.06871
   1 -15   0    8.03    1.89   0 0.95322-0.88283-0.26214-0.44539-0.13196 0.13242
   1 -14  -8    0.18    1.20   0 0.94584-0.88347-0.27745-0.38530-0.15011-0.28360
   1 -14  -7    0.69    1.70   0 0.95212-0.88866-0.26451-0.39686-0.13477-0.24699
   1 -14   2   34.36    1.99   0 0.95254-0.88079-0.26360-0.39600-0.13369 0.24271
   1 -13  -9   -0.44    1.21   0 0.94584-0.88454-0.27745-0.33827-0.15011-0.33828
   1 -13  -8    0.04    1.75   0 0.95349-0.89065-0.26153-0.35212-0.13124-0.30490
   1 -13   3    4.71    1.88   0 0.95352-0.88206-0.26147-0.35248-0.13118 0.29568
   1 -12  -9    1.76    1.88   0 0.95257-0.89049-0.26353-0.30265-0.13361-0.35694
   1 -12   4   14.26    1.92   0 0.95233-0.87849-0.26404-0.30062-0.13421 0.35442
   1 -11 -10   -0.40    1.18   0 0.94877-0.88902-0.27153-0.25035-0.14309-0.40048
   1 -10 -10    0.65    1.91   0 0.95349-0.89309-0.26153-0.21078-0.13124-0.41464
   1 -10   5   -0.67    1.96   0 0.95929-0.88416-0.24836-0.22439-0.11572 0.39271
   1  -9 -11   -1.24    1.26   0 0.94691-0.88816-0.27530-0.15219-0.14756-0.45067
   1  -8 -11    1.61    1.20   0 0.94955-0.89027-0.26992-0.10797-0.14117-0.45955
   1  -7 -11    0.22    1.67   0 0.95325-0.89136-0.26207-0.06727-0.13188-0.46538
   1  -6 -11    0.86    1.65   0 0.95268-0.89296-0.26329-0.01995-0.13332-0.46681
   1  -5 -11   54.91    2.04   0 0.95325-0.89065-0.26207 0.02926-0.13188-0.47082
   1  -4 -11   -0.00    1.61   0 0.95212-0.89273-0.26451 0.07347-0.13477-0.46167
   1  -4   6  105.35    3.31   0 0.96243-0.89015-0.24075 0.05067-0.10679 0.43559
   1  -3 -11    0.63    1.23   0 0.94811-0.88882-0.27288 0.13120-0.14468-0.45609
   1  -1 -10    1.32    1.60   0 0.95302-0.89252-0.26256 0.21534-0.13246-0.41336
   1  -1   5    4.01    1.52   0 0.94955-0.87401-0.26992 0.22177-0.14117 0.41537
   1   1  -9   -1.11    1.21   0 0.94942-0.88917-0.27019 0.31500-0.14149-0.34889
   1   1   4   17.00    2.09   0 0.95534-0.88058-0.25745 0.30418-0.12643 0.34625
   1   2  -8  171.09    3.17   0 0.95323-0.88751-0.26210 0.35890-0.13191-0.30593
   1   2   3  925.48    6.10   0 0.95323-0.87966-0.26210 0.35652-0.13192 0.29766
   2 -17   1    8.99    1.83   0 0.95631-0.81450-0.25527-0.54541-0.12386 0.18231
   2 -16   3    0.74    1.71   0 0.95430-0.80978-0.25977-0.49691-0.12917 0.29649
   2 -14   5   -3.69    2.64   0 0.95910-0.81325-0.24881-0.41260-0.11626 0.39469
   2 -11 -12   -0.34    1.88   0 0.95312-0.82420-0.26234-0.25956-0.13220-0.51914
   2  -9 -13    0.34    1.31   0 0.94890-0.82151-0.27126-0.15662-0.14277-0.56401
   2  -8 -13    0.43    1.55   0 0.95148-0.82322-0.26586-0.11198-0.13637-0.57235
   2  -8   8   43.12    3.38   0 0.97071-0.82793-0.21855-0.16182-0.08087 0.52095
   2  -7 -13   -0.33    1.76   0 0.95325-0.82593-0.26207-0.07135-0.13188-0.57506
   2  -6 -13   -0.35    1.84   0 0.95374-0.82705-0.26099-0.02541-0.13060-0.57740
   2  -5 -13    0.12    1.81   0 0.95368-0.82708-0.26112 0.02201-0.13076-0.57748
   2  -4 -13    2.28    1.91   0 0.95323-0.82477-0.26211 0.07324-0.13193-0.57649
   2  -4   8   75.28    2.42   0 0.95324-0.80644-0.26209 0.06975-0.13190 0.57152
   2  -3 -13   -0.34    1.65   0 0.95199-0.82395-0.26478 0.12056-0.13509-0.56946
   2  -3   8   -0.74    1.72   0 0.95455-0.80355-0.25922 0.11861-0.12852 0.56768
   2  -2 -13    0.22    1.38   0 0.94678-0.81975-0.27557 0.17840-0.14788-0.55990
   2   0 -12    0.68    1.75   0 0.95199-0.82261-0.26478 0.26482-0.13509-0.51889
   2   0   7    1.97    1.83   0 0.95321-0.80388-0.26215 0.26222-0.13197 0.51823
   2   2 -11   -2.65    1.60   0 0.95148-0.82170-0.26586 0.35707-0.13637-0.45989
   2   2   6  294.84    3.10   0 0.95497-0.80699-0.25828 0.35059-0.12740 0.45953
   2   3 -10   15.27    2.02   0 0.95522-0.82120-0.25773 0.40168-0.12675-0.42098
   2   3   5    3.45    1.27   0 0.94981-0.80341-0.26938 0.40966-0.14053 0.41644
   2   4  -9    9.55    2.18   0 0.96238-0.82395-0.24088 0.43193-0.10694-0.38250
   2   4   4  455.34    3.53   0 0.94916-0.80350-0.27073 0.45707-0.14213 0.36574
   2   5   3  310.69    3.29   0 0.95337-0.80781-0.26181 0.49744-0.13157 0.30045
   2   6   1    2.37    1.88   0 0.95153-0.80858-0.26576 0.54946-0.13625 0.19457
   3  -1 -14    8.15    1.89   0 0.95431-0.75564-0.25973 0.21338-0.12912-0.63368
   3  -1   9  123.80    2.38   0 0.95325-0.73466-0.26207 0.21148-0.13188 0.63032
   3   0 -14   -0.47    1.32   0 0.94785-0.75095-0.27342 0.27085-0.14532-0.61659
   3   2 -13   -2.56    1.78   0 0.95135-0.75265-0.26613 0.35724-0.13669-0.56744
   3   3   7   -0.26    1.11   0 0.94798-0.72800-0.27315 0.41500-0.14500 0.53149
   3   7   3  106.11    2.11   0 0.95217-0.73677-0.26439 0.59445-0.13463 0.30775
   3   8   1  164.85    2.64   0 0.95289-0.73815-0.26283 0.64072-0.13278 0.19671
   4 -12  10    2.74    3.77   0 0.98392-0.69708-0.17233-0.39539-0.02758 0.58464
   4  -8  11    0.57    2.07   0 0.95744-0.66231-0.25270-0.12462-0.12083 0.72591
   4  -7  11   -1.97    1.99   0 0.95699-0.66262-0.25373-0.07639-0.12204 0.73215
   4  -6  11   -0.21    1.63   0 0.95300-0.65749-0.26261-0.01877-0.13252 0.74042
   4  -5  11    0.71    1.68   0 0.95274-0.65705-0.26316 0.02702-0.13317 0.74055
   4  -4  11   -0.19    1.70   0 0.95387-0.65803-0.26071 0.07368-0.13028 0.73655
   4   0  10   -0.41    1.31   0 0.94994-0.65558-0.26911 0.27021-0.14021 0.69233
   4   2   9  -34.03    2.38   0 0.94611-0.65298-0.27691 0.37215-0.14947 0.64688
   4   3 -14   -0.48    1.77   0 0.95148-0.68295-0.26586 0.40414-0.13637-0.62149
   4   4   8    1.70    1.39   0 0.94942-0.65691-0.27019 0.45932-0.14149 0.58507
   4   8   4  -64.37    2.89   0 0.94968-0.66248-0.26965 0.64725-0.14085 0.36410
   4   9   2   -7.58    1.62   0 0.94811-0.66317-0.27288 0.69751-0.14468 0.25840
   4  10  -4    0.20    1.65   0 0.95174-0.67182-0.26532 0.73780-0.13573-0.07774
   4  10  -3  -23.82    2.41   0 0.95325-0.67215-0.26207 0.74018-0.13188-0.02810
   4  10  -2   -3.92    1.65   0 0.95123-0.67053-0.26641 0.74049-0.13701 0.03129
   4  10  -1   -8.62    1.94   0 0.95325-0.67034-0.26207 0.73580-0.13188 0.08263
   5  -8  12    0.02    2.21   0 0.95750-0.59122-0.25255-0.12381-0.12065 0.78542
   5  -7  12   -0.21    1.86   0 0.95300-0.58549-0.26261-0.06557-0.13252 0.79660
   5  -6  12   -2.50    2.03   0 0.95230-0.58505-0.26410-0.01718-0.13429 0.79939
   5  -5  12    0.59    1.80   0 0.95325-0.58613-0.26207 0.02557-0.13188 0.79836
   5  -4  12    0.51    1.67   0 0.95287-0.58506-0.26289 0.07399-0.13284 0.79617
   5  -3  12    0.21    1.67   0 0.95325-0.58459-0.26207 0.12040-0.13188 0.79092
   5   0  11    0.67    1.32   0 0.94758-0.58090-0.27396 0.27404-0.14596 0.75509
   5   1  11   -0.76    1.68   0 0.95393-0.58738-0.26058 0.30869-0.13012 0.73663
   5   3  10   -2.43    1.79   0 0.95262-0.58771-0.26343 0.40662-0.13349 0.68796
   5   5   9   -1.26    1.59   0 0.95418-0.59063-0.26004 0.49542-0.12948 0.62539
   5   6   8   -0.51    1.48   0 0.95224-0.58921-0.26424 0.54993-0.13445 0.58041
   5   7   7   -1.28    1.21   0 0.94955-0.58803-0.26992 0.60087-0.14117 0.52994
   5   8   6   -7.08    1.53   0 0.95046-0.59008-0.26803 0.64593-0.13893 0.47277
   5   9   5    1.14    1.61   0 0.95362-0.59308-0.26125 0.68543-0.13091 0.41078
   5  10   3   -4.08    1.62   0 0.95218-0.59479-0.26438 0.73886-0.13461 0.30501
   5  11  -6    0.19    1.89   0 0.96132-0.61036-0.24349 0.76672-0.11001-0.21050
   5  11   0   -1.57    1.58   0 0.95180-0.59775-0.26519 0.78698-0.13557 0.14092
   5  11   1  -20.21    2.41   0 0.95473-0.60018-0.25881 0.77465-0.12804 0.18736
   6  -4  13   -0.37    1.64   0 0.95479-0.51548-0.25868 0.07253-0.12787 0.84373
   6   0  12   -0.85    1.29   0 0.94942-0.51100-0.27019 0.27184-0.14149 0.80544
   6   1  12    0.16    1.65   0 0.95455-0.51656-0.25922 0.30730-0.12852 0.78907
   6   3  11   -2.20    1.75   0 0.95262-0.51562-0.26343 0.40687-0.13349 0.74393
   6   5  10   -0.82    1.70   0 0.95343-0.51748-0.26166 0.49852-0.13140 0.68532
   6   6   9    0.04    1.23   0 0.94850-0.51375-0.27207 0.55615-0.14373 0.64318
   6   7   8    0.81    1.27   0 0.94557-0.51095-0.27799 0.60876-0.15075 0.59688
   6   9   6   -0.67    1.19   0 0.94678-0.51549-0.27557 0.70087-0.14788 0.48288
   6  10   5   -1.00    1.54   0 0.95230-0.52160-0.26410 0.73912-0.13429 0.41594
   6  11   3   -0.46    1.28   0 0.94929-0.52134-0.27046 0.78999-0.14181 0.31241
   6  12  -6    0.67    1.92   0 0.95475-0.53481-0.25876 0.82514-0.12797-0.19202
   6  12   0   -0.70    1.27   0 0.94942-0.52467-0.27019 0.83649-0.14149 0.14765
   6  12   1    0.34    1.68   0 0.95485-0.52758-0.25854 0.82536-0.12771 0.19063
   7   2  12   -1.83    1.40   0 0.94798-0.43874-0.27315 0.36931-0.14500 0.81058
   7   3  12   -1.53    1.75   0 0.95436-0.44579-0.25963 0.40178-0.12900 0.79112
   7   4  11   -1.41    1.34   0 0.94638-0.43834-0.27638 0.46671-0.14884 0.75951
   7   5  11   -1.00    1.59   0 0.95325-0.44572-0.26207 0.49502-0.13188 0.73707
   7   6  10    1.13    1.28   0 0.94981-0.44206-0.26938 0.55296-0.14053 0.69757
   7   7   9   -0.03    1.33   0 0.94584-0.44017-0.27745 0.60911-0.15011 0.65106
   7  10   6    1.02    1.18   0 0.94691-0.44336-0.27530 0.74776-0.14756 0.48553
   7  11   5    1.48    1.82   0 0.95199-0.44948-0.26478 0.78452-0.13509 0.41835
   7  12   3   -0.13    1.71   0 0.95218-0.45248-0.26438 0.83390-0.13461 0.30709
   7  13  -6   -0.10    1.75   0 0.95983-0.46893-0.24708 0.86126-0.11422-0.20460
   7  13  -5   -0.11    1.82   0 0.95230-0.46167-0.26410 0.87833-0.13429-0.13262
   7  13  -1    0.21    1.33   0 0.94903-0.45428-0.27100 0.88476-0.14245 0.09486
   7  13   0   -0.91    1.81   0 0.95300-0.45719-0.26261 0.87682-0.13252 0.13973
   8   8   9    0.31    1.46   0 0.94624-0.36961-0.27664 0.65559-0.14915 0.65117
   8  10   7    1.59    1.33   0 0.94665-0.37100-0.27584 0.74845-0.14820 0.54238
   8  11   6   -1.95    1.39   0 0.95007-0.37681-0.26884 0.78930-0.13989 0.47734
   8  12   4    1.12    1.40   0 0.94651-0.37401-0.27611 0.84332-0.14852 0.37851
   8  12   5   -0.06    1.71   0 0.95436-0.38306-0.25963 0.82401-0.12900 0.40989
   8  13   2   -1.17    1.41   0 0.94890-0.37995-0.27126 0.88529-0.14277 0.26060
   8  13   3    0.24    1.70   0 0.95461-0.38542-0.25908 0.86998-0.12836 0.29991
   0 -11  -4   55.84    1.61   0 0.95570-0.96217-0.25238-0.26519-0.12576-0.09332
   0 -11  -3   93.64    1.84   0 0.95799-0.96317-0.24716-0.27040-0.11969-0.04457
   0 -11  -2   27.00    1.35   0 0.95869-0.96255-0.24550-0.27206-0.11778 0.00855
   0 -11  -1   21.23    1.35   0 0.95739-0.95983-0.24853-0.26902-0.12129 0.06699
   0 -10  -5  422.78    3.06   0 0.95822-0.96589-0.24660-0.22396-0.11905-0.15527
   0 -10  -4   74.25    2.06   0 0.96234-0.96871-0.23669-0.23313-0.10758-0.11294
   0 -10   0   15.37    1.80   0 0.96262-0.96443-0.23599-0.23422-0.10677 0.10637
   0  -9  -6   -0.48    1.66   0 0.95775-0.96701-0.24771-0.18074-0.12033-0.20312
   0  -9  -5   36.68    1.80   0 0.96368-0.97084-0.23332-0.18925-0.10369-0.17155
   0  -8  -7    0.82    1.11   0 0.95460-0.96514-0.25485-0.12507-0.12863-0.25235
   0  -8  -6   92.15    2.02   0 0.96202-0.97030-0.23749-0.13776-0.10850-0.22178
   0  -8   2  486.76    5.21   0 0.96211-0.96159-0.23726-0.13849-0.10824 0.21739
   0  -7  -7    0.49    1.12   0 0.95727-0.96775-0.24881-0.08382-0.12161-0.25961
   0  -6  -7    0.33    1.19   0 0.95893-0.96976-0.24495-0.04235-0.11714-0.26205
   0  -5  -7   16.95    1.57   0 0.96154-0.96730-0.23866 0.00450-0.10986-0.27476
   0  -4  -7    0.80    1.03   0 0.95822-0.96861-0.24660 0.05575-0.11906-0.26296
   0  -3  -7   13.38    1.26   0 0.95534-0.96487-0.25320 0.11284-0.12672-0.25733
   0  -2  -6   15.05    1.77   0 0.96168-0.96855-0.23832 0.14626-0.10946-0.22084
   0  -1  -5   11.56    2.03   0 0.96433-0.97005-0.23166 0.18702-0.10177-0.17333
   0   0  -4  203.25    3.61   0 0.96168-0.96581-0.23832 0.24063-0.10946-0.11123
   1 -15  -3   38.19    1.60   0 0.95631-0.89121-0.25101-0.45562-0.12416-0.03664
   1 -15  -2    0.52    1.12   0 0.95679-0.88883-0.24991-0.45904-0.12289 0.01872
   1 -14  -6    2.72    1.25   0 0.95631-0.89434-0.25101-0.41191-0.12416-0.19929
   1 -14  -5   27.85    1.88   0 0.96163-0.89709-0.23844-0.42034-0.10961-0.16260
   1 -14   1   39.52    2.04   0 0.96078-0.88935-0.24053-0.41820-0.11202 0.17097
   1 -13  -7   15.57    1.26   0 0.95869-0.89807-0.24550-0.36862-0.11778-0.26291
   1 -12  -8   -0.89    1.13   0 0.95869-0.89982-0.24550-0.32505-0.11778-0.31300
   1 -11  -9    1.89    1.19   0 0.95655-0.89897-0.25046-0.27149-0.12353-0.36500
   1 -10  -9   -0.56    1.69   0 0.96157-0.90375-0.23859-0.23626-0.10978-0.37808
   1  -9 -10    0.67    1.23   0 0.95619-0.89997-0.25128-0.17636-0.12448-0.41924
   1  -8 -10   -1.05    1.47   0 0.95928-0.90303-0.24412-0.13627-0.11618-0.42780
   1  -7 -10   -1.06    1.68   0 0.96168-0.90532-0.23832-0.09541-0.10946-0.43413
   1  -6 -10  102.94    2.24   0 0.96333-0.90481-0.23421-0.04703-0.10472-0.44322
   1  -5 -10   45.32    1.92   0 0.96390-0.90521-0.23277-0.00133-0.10305-0.44478
   1  -4 -10   65.83    2.17   0 0.96335-0.90457-0.23416 0.04720-0.10465-0.44328
   1  -3 -10   21.58    1.87   0 0.96178-0.90254-0.23807 0.09823-0.10917-0.43855
   1  -3   6  187.48    3.49   0 0.96355-0.88692-0.23367 0.09198-0.10409 0.43245
   1  -2 -10   -0.44    1.22   0 0.95751-0.90240-0.24826 0.14870-0.12097-0.42346
   1   0  -9  159.47    2.74   0 0.96167-0.89957-0.23834 0.23986-0.10949-0.38342
   1   0   5  689.64    5.23   0 0.96440-0.88794-0.23149 0.23177-0.10157 0.37602
   1   3   2   67.21    2.29   0 0.95619-0.88218-0.25128 0.39395-0.12448 0.23446
   1   4  -4    0.01    1.31   0 0.96168-0.89828-0.23832 0.42729-0.10946-0.11216
   1   4   0  275.23    4.04   0 0.95679-0.88515-0.24991 0.44021-0.12289 0.12369
   2 -17  -4   18.43    1.92   0 0.96134-0.82499-0.23917-0.56082-0.11045-0.10310
   2 -17  -3    8.14    1.86   0 0.96258-0.82610-0.23610-0.56466-0.10690-0.05218
   2 -17  -2   -0.44    1.78   0 0.96302-0.82548-0.23499-0.56636-0.10562-0.00018
   2 -17  -1    0.44    1.72   0 0.96200-0.82276-0.23753-0.56537-0.10855 0.05927
   2 -17   0    9.64    1.85   0 0.96029-0.81845-0.24170-0.55986-0.11338 0.12090
   2 -16  -6   11.94    1.94   0 0.96354-0.83071-0.23368-0.52033-0.10410-0.22130
   2 -16   2    0.83    1.51   0 0.96423-0.82160-0.23194-0.52230-0.10209 0.21581
   2 -15  -8    1.73    1.81   0 0.96167-0.83026-0.23835-0.46721-0.10950-0.32499
   2 -15   4    0.11    1.83   0 0.96061-0.81312-0.24095-0.46324-0.11250 0.33784
   2 -14  -9    9.43    1.88   0 0.96184-0.83231-0.23794-0.42157-0.10902-0.38026
   2 -13 -10    3.65    1.77   0 0.96095-0.83197-0.24012-0.37279-0.11154-0.43071
   2 -12 -11   -0.89    1.38   0 0.95691-0.83169-0.24963-0.32218-0.12257-0.47160
   2 -11 -11    3.28    1.81   0 0.96236-0.83484-0.23665-0.28107-0.10754-0.49258
   2 -10 -12   -0.53    1.24   0 0.95595-0.83249-0.25183-0.22612-0.12512-0.52473
   2  -9 -12    0.65    1.50   0 0.96168-0.83338-0.23832-0.18223-0.10946-0.54057
   2  -8 -12    3.21    1.66   0 0.96280-0.83608-0.23555-0.14072-0.10626-0.54895
   2  -2 -12   36.87    2.02   0 0.96269-0.83516-0.23582 0.14247-0.10658-0.54904
   2  -2   8    3.98    1.74   0 0.96280-0.81226-0.23555 0.13971-0.10626 0.54760
   2  -1 -12   -1.59    1.29   0 0.95751-0.83452-0.24826 0.19550-0.12097-0.53273
   2   1 -11   21.95    1.86   0 0.96191-0.83222-0.23776 0.28548-0.10882-0.49248
   2   1   7  234.15    2.92   0 0.96379-0.81392-0.23305 0.27976-0.10337 0.48963
   2   6   2   44.56    1.98   0 0.96167-0.81662-0.23834 0.52235-0.10949 0.22220
   2   7  -2   96.09    2.79   0 0.96191-0.81994-0.23776 0.56988-0.10882 0.00240
   3  -7  10   91.04    3.18   0 0.96997-0.74905-0.21642-0.11580-0.08424 0.63616
   3  -6 -14    0.86    1.93   0 0.96168-0.76993-0.23832-0.04855-0.10946-0.65317
   3  -6  10    0.30    1.94   0 0.96723-0.74282-0.22403-0.05969-0.09299 0.65055
   3  -5 -14    4.69    1.88   0 0.96313-0.76747-0.23471 0.00022-0.10530-0.65782
   3  -5  10   10.70    1.81   0 0.96366-0.74101-0.23337-0.00471-0.10374 0.65502
   3  -4 -14    3.28    1.85   0 0.96250-0.76719-0.23629 0.04823-0.10712-0.65622
   3  -4  10   12.45    1.73   0 0.96455-0.74204-0.23110 0.04048-0.10113 0.65247
   3  -3 -14    3.91    1.84   0 0.96141-0.76578-0.23899 0.09775-0.11024-0.65212
   3  -3  10   -1.75    2.15   0 0.96548-0.73973-0.22867 0.08798-0.09833 0.65032
   3  -2 -14    0.01    1.39   0 0.95775-0.76655-0.24771 0.14723-0.12033-0.64148
   3   0   9    0.60    1.90   0 0.95751-0.73125-0.24826 0.25132-0.12097 0.61681
   3   1 -13   -0.06    1.84   0 0.95893-0.76498-0.24495 0.28924-0.11714-0.59144
   3   2   8  112.13    1.91   0 0.95485-0.73050-0.25430 0.34779-0.12799 0.56996
   3   3 -12   11.17    1.86   0 0.96168-0.75945-0.23832 0.37978-0.10946-0.54376
   3   4 -11   13.29    2.21   0 0.97005-0.76585-0.21618 0.40489-0.08396-0.51506
   3   4   7  214.53    2.60   0 0.96166-0.74157-0.23837 0.42737-0.10952 0.49857
   3   5   6    0.94    1.11   0 0.95715-0.73526-0.24908 0.48752-0.12193 0.45199
   3   6   5   68.37    1.62   0 0.95775-0.73733-0.24771 0.53088-0.12033 0.39832
   3   7   4  357.17    3.10   0 0.96179-0.74262-0.23805 0.56863-0.10915 0.33354
   3   8   2   19.01    1.69   0 0.96098-0.74526-0.24004 0.61892-0.11145 0.22586
   4  -9  11   -0.09    2.29   0 0.96185-0.66051-0.23790-0.18208-0.10898 0.71433
   4  -3  11   -6.47    2.33   0 0.95631-0.65606-0.25101 0.11305-0.12416 0.73118
   4  -2  11    1.85    1.71   0 0.96153-0.66309-0.23870 0.14569-0.10991 0.71894
   4  -1  11    0.71    1.61   0 0.96625-0.66859-0.22665 0.17962-0.09599 0.70608
   4   1  10   -0.09    1.23   0 0.95655-0.65811-0.25046 0.30214-0.12353 0.67387
   4   2 -14    0.50    2.00   0 0.96191-0.69382-0.23776 0.33346-0.10882-0.65281
   4   3   9   46.69    1.49   0 0.95534-0.65852-0.25320 0.39351-0.12672 0.62531
   4   4 -13    2.41    1.80   0 0.95968-0.69291-0.24316 0.43059-0.11506-0.59254
   4   5   8    9.71    1.57   0 0.96168-0.66898-0.23832 0.47459-0.10946 0.55517
   4   6   7   48.25    1.46   0 0.95751-0.66373-0.24826 0.53092-0.12097 0.50974
   4   7   6  389.35    2.90   0 0.95751-0.66447-0.24826 0.57840-0.12097 0.45565
   4   8  -9   19.54    3.42   0 0.98935-0.71156-0.14135 0.51719 0.00081-0.48965
   4   8   5   88.43    2.06   0 0.96163-0.67206-0.23844 0.61672-0.10960 0.39158
   4   9   3   14.43    1.36   0 0.95667-0.66739-0.25018 0.67582-0.12321 0.29343
   4  10  -5   -1.18    1.90   0 0.96168-0.68281-0.23832 0.71443-0.10946-0.15982
   4  10   0   -1.32    1.77   0 0.95595-0.67325-0.25183 0.72412-0.12512 0.12499
   4  10   1   23.67    1.82   0 0.96166-0.67471-0.23837 0.71203-0.10952 0.17197
   5  -2  12   -2.27    2.15   0 0.95986-0.58909-0.24274 0.15248-0.11458 0.77992
   5  -1  12    1.13    1.72   0 0.96256-0.59064-0.23614 0.19173-0.10694 0.77004
   5   2  11   18.87    1.86   0 0.96220-0.59427-0.23704 0.32950-0.10798 0.71934
   5   4  10   -1.09    1.62   0 0.96009-0.59028-0.24219 0.43491-0.11394 0.66537
   5   6 -13   -0.48    1.94   0 0.96078-0.62343-0.24053 0.52096-0.11202-0.59571
   5   7 -12    0.49    2.30   0 0.96593-0.62595-0.22750 0.55904-0.09698-0.55629
   5   7   8   18.38    1.71   0 0.96266-0.59704-0.23590 0.56534-0.10667 0.55365
   5   8 -11   -0.56    2.73   0 0.97371-0.63130-0.20528 0.58163-0.07148-0.52551
   5   8   7   52.42    1.87   0 0.96224-0.59718-0.23693 0.61367-0.10786 0.50066
   5   9   6   56.16    1.80   0 0.96400-0.60003-0.23252 0.65636-0.10276 0.44098
   5  10   4  -12.72    1.77   0 0.95916-0.59940-0.24440 0.71825-0.11650 0.33596
   5  11   2   20.68    1.93   0 0.96168-0.60272-0.23832 0.75828-0.10946 0.22936
   6  -3  13   -1.40    1.79   0 0.95951-0.51645-0.24357 0.10678-0.11554 0.83777
   6  -2  13   -0.67    1.91   0 0.96146-0.51808-0.23887 0.14915-0.11010 0.83021
   6  -1  13   -1.05    1.64   0 0.96379-0.52075-0.23305 0.19017-0.10337 0.82007
   6   2  12   -1.75    1.74   0 0.96191-0.51979-0.23776 0.33600-0.10882 0.77284
   6   4  11   -0.24    1.74   0 0.96049-0.51989-0.24122 0.43399-0.11282 0.72285
   6   6  10   -0.57    1.62   0 0.96241-0.52297-0.23652 0.52227-0.10738 0.66026
   6   7   9   -1.72    1.62   0 0.96026-0.52182-0.24177 0.57702-0.11346 0.61473
   6   8   8  -12.03    1.67   0 0.95715-0.52030-0.24908 0.63062-0.12193 0.56203
   6   9   7   -1.25    1.22   0 0.95787-0.52260-0.24743 0.67606-0.12001 0.50524
   6  10   6    0.97    1.61   0 0.96126-0.52620-0.23936 0.71399-0.11067 0.44721
   6  11  -9   -0.24    2.52   0 0.98219-0.56283-0.17560 0.70048-0.03774-0.44946
   6  11   4   -0.81    1.31   0 0.95703-0.52636-0.24936 0.77124-0.12225 0.34238
   6  12   2    1.25    2.09   0 0.96168-0.53136-0.23832 0.80942-0.10946 0.23269
   7   6  11    1.53    1.77   0 0.96423-0.45225-0.23194 0.51545-0.10209 0.71630
   7   7  10    1.61    1.63   0 0.95990-0.44788-0.24265 0.57723-0.11447 0.67111
   7   8   9   -3.61    1.37   0 0.95643-0.44710-0.25073 0.63325-0.12385 0.61985
   7   9   8   -1.18    1.32   0 0.95570-0.44792-0.25238 0.68156-0.12576 0.56648
   7  10   7    0.00    1.24   0 0.95715-0.45093-0.24908 0.72529-0.12193 0.50766
   7  11   6    1.35    1.73   0 0.96068-0.45458-0.24077 0.76314-0.11229 0.44633
   7  12   4   -3.44    1.41   0 0.95811-0.45643-0.24688 0.81639-0.11937 0.33995
   7  13   1   -0.93    1.44   0 0.95655-0.45934-0.25046 0.86636-0.12353 0.17939
   7  13   2    5.62    1.98   0 0.96157-0.46056-0.23861 0.85405-0.10979 0.22630
   0 -10  -3    1.41    1.20   0 0.96460-0.97028-0.22961-0.24217-0.10117-0.06265
   0 -10  -2   35.02    1.46   0 0.96609-0.97054-0.22570-0.24448-0.09668-0.01365
   0 -10  -1  519.68    3.80   0 0.96545-0.96882-0.22738-0.24282-0.09860 0.04309
   0  -9  -4  199.22    2.34   0 0.96754-0.97422-0.22179-0.20239-0.09219-0.12854
   0  -9  -3   24.63    1.66   0 0.97066-0.97651-0.21304-0.21028-0.08218-0.08307
   0  -9   0   -0.28    1.71   0 0.97030-0.97223-0.21407-0.21144-0.08336 0.08599
   0  -9   1   72.81    2.04   0 0.96503-0.96576-0.22849-0.19453-0.09988 0.15410
   0  -8  -5   26.16    1.31   0 0.96754-0.97512-0.22179-0.15519-0.09219-0.18362
   0  -7  -6   93.98    1.74   0 0.96470-0.97354-0.22933-0.09918-0.10085-0.22935
   0  -7  -5  206.03    2.55   0 0.97101-0.97857-0.21202-0.11648-0.08102-0.19418
   0  -7   2  806.29    7.09   0 0.97135-0.97083-0.21103-0.11797-0.07989 0.18900
   0  -6  -6    1.12    1.12   0 0.96672-0.97565-0.22402-0.05903-0.09475-0.23409
   0  -5  -6   -0.06    1.08   0 0.96775-0.97690-0.22123-0.01653-0.09155-0.23522
   0  -4  -6   10.89    1.29   0 0.96744-0.97542-0.22207 0.03353-0.09251-0.23910
   0  -3  -6  101.86    1.91   0 0.96545-0.97341-0.22738 0.08781-0.09860-0.23191
   0  -2  -5   25.31    1.95   0 0.97103-0.97726-0.21196 0.11969-0.08095-0.19445
   0   0  -3    0.39    2.50   0 0.97045-0.97422-0.21365 0.21377-0.08287-0.08205
   1 -14  -4  114.05    2.07   0 0.96384-0.90067-0.23156-0.42762-0.10341-0.11390
   1 -14  -3   20.14    1.42   0 0.96609-0.90168-0.22570-0.43340-0.09668-0.06556
   1 -14  -2   23.81    1.46   0 0.96724-0.90132-0.22262-0.43652-0.09315-0.01410
   1 -14  -1    4.42    1.27   0 0.96682-0.89964-0.22374-0.43559-0.09443 0.04224
   1 -14   0   31.36    1.53   0 0.96470-0.89626-0.22933-0.42944-0.10085 0.10343
   1 -13  -6   -0.91    1.22   0 0.96405-0.90298-0.23100-0.38305-0.10277-0.22124
   1 -13  -5   24.61    1.85   0 0.96968-0.90482-0.21586-0.39547-0.08540-0.18617
   1 -13   1   52.31    1.96   0 0.97263-0.90307-0.20720-0.40475-0.07551 0.13292
   1 -13   2    3.85    1.62   0 0.96619-0.89503-0.22542-0.38640-0.09636 0.20863
   1 -12  -7   14.81    1.28   0 0.96524-0.90532-0.22793-0.33678-0.09924-0.28325
   1 -12  -6    2.33    1.62   0 0.97084-0.90930-0.21253-0.35298-0.08159-0.24593
   1 -12   3   19.87    1.88   0 0.97001-0.89803-0.21489-0.34950-0.08429 0.25160
   1 -11  -8    1.85    1.16   0 0.96438-0.90544-0.23016-0.28831-0.10181-0.33474
   1 -11  -7   38.90    1.80   0 0.97101-0.91079-0.21203-0.30579-0.08102-0.30134
   1 -11   4  129.34    3.26   0 0.97004-0.89692-0.21481-0.30174-0.08420 0.30635
   1 -10  -8   47.49    1.86   0 0.96976-0.90927-0.21562-0.25486-0.08512-0.35187
   1  -9  -9   -2.17    1.19   0 0.96535-0.90813-0.22765-0.19885-0.09892-0.39047
   1  -8  -9   14.72    1.69   0 0.96964-0.90914-0.21596-0.15981-0.08552-0.40624
   1  -7  -9   -0.77    1.41   0 0.97054-0.91375-0.21337-0.11995-0.08255-0.40958
   1  -2  -9   25.35    1.79   0 0.97132-0.91172-0.21112 0.11775-0.07998-0.41301
   1  -2   6  146.93    3.13   0 0.97034-0.89296-0.21395 0.12022-0.08321 0.41255
   1  -1  -9    5.84    1.61   0 0.96928-0.90688-0.21697 0.17052-0.08668-0.40423
   1   1  -8  244.49    3.29   0 0.96955-0.90460-0.21621 0.26435-0.08580-0.35211
   1   2  -7   81.21    2.51   0 0.97093-0.90764-0.21225 0.30750-0.08127-0.30253
   1   2   4  214.05    3.25   0 0.97121-0.89505-0.21143 0.30688-0.08033 0.29990
   1   3  -6  131.22    3.29   0 0.97003-0.90522-0.21484 0.35740-0.08423-0.24502
   1   4   1  940.75    6.25   0 0.96765-0.89443-0.22151 0.41114-0.09187 0.14734
   2 -16  -5   -1.12    1.35   0 0.96724-0.83415-0.22262-0.53218-0.09315-0.17432
   2 -16  -4   10.49    1.80   0 0.97031-0.83598-0.21404-0.54032-0.08332-0.13062
   2 -16   1    5.72    1.86   0 0.96986-0.82930-0.21534-0.53782-0.08480 0.14415
   2 -15  -7    4.84    1.36   0 0.96661-0.83609-0.22430-0.48275-0.09508-0.28474
   2 -15  -6   12.91    1.73   0 0.97160-0.84008-0.21027-0.49574-0.07902-0.24573
   2 -15   3    8.84    1.81   0 0.97124-0.82859-0.21134-0.49440-0.08024 0.25018
   2 -14  -8   -0.03    1.58   0 0.96806-0.83864-0.22039-0.43956-0.09058-0.34442
   2 -13  -9   -0.47    1.52   0 0.96881-0.83927-0.21828-0.39339-0.08818-0.39712
   2 -12 -10   -0.86    1.31   0 0.96577-0.83908-0.22654-0.34120-0.09764-0.44475
   2 -11 -10    6.07    1.67   0 0.97066-0.84303-0.21304-0.30515-0.08218-0.46373
   2 -10 -11    0.30    1.29   0 0.96619-0.84073-0.22542-0.24834-0.09636-0.50137
   2  -9 -11    0.85    1.65   0 0.96996-0.84288-0.21506-0.20848-0.08448-0.51608
   2  -7 -12   16.03    1.34   0 0.96449-0.83952-0.22989-0.09917-0.10149-0.55346
   2  -6 -12    2.67    1.26   0 0.96588-0.84047-0.22626-0.05637-0.09732-0.55796
   2  -5 -12    9.96    1.52   0 0.96651-0.83975-0.22458-0.01131-0.09540-0.56165
   2  -4 -12   30.34    1.62   0 0.96619-0.83927-0.22542 0.03663-0.09636-0.56102
   2  -3 -12   21.91    1.54   0 0.96492-0.83871-0.22877 0.08758-0.10020-0.55575
   2  -1   8  214.07    3.01   0 0.96974-0.82027-0.21569 0.16943-0.08521 0.52663
   2   0 -11   -0.68    1.64   0 0.96922-0.84188-0.21716 0.21504-0.08689-0.51253
   2   2 -10    2.68    1.76   0 0.97023-0.84023-0.21427 0.30930-0.08358-0.46214
   2   3   6   -0.79    1.11   0 0.96703-0.81684-0.22318 0.36513-0.09379 0.42531
   2   4   5   21.40    1.30   0 0.96470-0.81563-0.22933 0.41878-0.10085 0.37718
   2   5   4  193.81    2.38   0 0.96577-0.81744-0.22654 0.46322-0.09764 0.31934
   2   6   3   29.89    1.83   0 0.97072-0.82357-0.21287 0.49691-0.08198 0.24882
   2   7  -4  153.49    4.42   0 0.97493-0.83473-0.20005 0.53203-0.06737-0.14871
   2   7  -3   24.89    2.05   0 0.96505-0.82426-0.22844 0.56150-0.09982-0.06128
   2   7  -1  270.99    3.47   0 0.96373-0.82082-0.23184 0.56366-0.10373 0.05198
   2   7   0  151.92    2.92   0 0.96840-0.82462-0.21943 0.55149-0.08949 0.09240
   3 -16   5   -0.14    1.95   0 0.96936-0.75245-0.21674-0.53809-0.08641 0.36723
   3 -15   6    0.74    2.33   0 0.97177-0.75416-0.20977-0.49834-0.07844 0.41428
   3 -14   7   -1.27    2.47   0 0.97329-0.75323-0.20520-0.45371-0.07323 0.46221
   3  -9 -13    0.89    1.77   0 0.96976-0.77174-0.21562-0.20581-0.08512-0.61975
   3  -8 -13    1.36    1.75   0 0.97103-0.77515-0.21196-0.16412-0.08095-0.62802
   3  -8  10    4.47    2.23   0 0.97732-0.75555-0.19217-0.18266-0.05841 0.61292
   3  -2  10    0.61    1.58   0 0.96986-0.74448-0.21534 0.12147-0.08480 0.63898
   3  -1 -13    1.20    1.67   0 0.96976-0.77464-0.21562 0.16921-0.08512-0.62591
   3   0 -13    4.79    1.42   0 0.96630-0.76928-0.22514 0.22581-0.09604-0.61387
   3   1   9   73.62    1.78   0 0.96609-0.74287-0.22570 0.27257-0.09668 0.59310
   3   2 -12    0.90    1.84   0 0.97064-0.77164-0.21309 0.30866-0.08223-0.57195
   3   3   8  145.24    2.06   0 0.96545-0.74185-0.22738 0.36867-0.09860 0.54117
   3   5 -10   13.05    2.35   0 0.97643-0.77236-0.19516 0.42900-0.06180-0.48329
   3   5   7   51.85    1.83   0 0.97108-0.74846-0.21182 0.44836-0.08078 0.46875
   3   6  -9   21.16    2.65   0 0.97996-0.77515-0.18279 0.46322-0.04778-0.44408
   3   6   6  280.22    2.82   0 0.97015-0.74846-0.21450 0.49832-0.08385 0.41703
   3   7   5  152.41    2.28   0 0.97167-0.75092-0.21008 0.54108-0.07879 0.35713
   3   8   3  112.27    2.09   0 0.96904-0.75188-0.21766 0.59666-0.08747 0.25692
   3   9  -4   29.47    2.29   0 0.97215-0.76090-0.20864 0.63498-0.07715-0.13647
   3   9  -3  123.61    2.87   0 0.96631-0.75450-0.22510 0.65188-0.09599-0.06256
   3   9  -2   42.16    1.75   0 0.96405-0.75088-0.23100 0.65739-0.10277-0.00132
   3   9  -1    0.93    1.14   0 0.96513-0.75171-0.22821 0.65337-0.09956 0.04823
   3   9   0  285.28    3.27   0 0.96865-0.75350-0.21873 0.64510-0.08869 0.09382
   4   0  11    0.01    1.71   0 0.97025-0.67180-0.21421 0.21628-0.08352 0.69222
   4   1 -14    0.92    1.87   0 0.96969-0.70192-0.21581 0.26429-0.08535-0.67615
   4   2  10   24.62    1.38   0 0.96503-0.66823-0.22849 0.32197-0.09988 0.65402
   4   3 -13   -1.15    1.62   0 0.97132-0.70430-0.21112 0.35216-0.07998-0.63081
   4   4   9   73.98    1.67   0 0.96535-0.66933-0.22765 0.41605-0.09892 0.59831
   4   5 -12    9.55    1.92   0 0.96993-0.69962-0.21514 0.44915-0.08457-0.56945
   4   6   8    6.70    1.59   0 0.97072-0.67504-0.21287 0.49663-0.08198 0.52757
   4   7   7   24.51    1.69   0 0.96976-0.67623-0.21562 0.54662-0.08512 0.47529
   4   8   6   51.15    1.86   0 0.97054-0.67767-0.21338 0.59145-0.08256 0.41769
   4   9   4   76.97    1.68   0 0.96513-0.67344-0.22821 0.65329-0.09956 0.32538
   4  10  -6    0.69    2.17   0 0.97257-0.69363-0.20737 0.67945-0.07570-0.24762
   4  10   2    0.97    1.20   0 0.96651-0.67783-0.22458 0.69709-0.09540 0.21008
   5   0  12    1.27    1.67   0 0.96965-0.59968-0.21594 0.21743-0.08549 0.75565
   5   3  11    1.28    1.72   0 0.96937-0.59959-0.21673 0.35993-0.08640 0.69972
   5   5  10   14.60    1.73   0 0.96976-0.60240-0.21562 0.45227-0.08512 0.64208
   5   6   9    7.37    1.15   0 0.96481-0.59709-0.22905 0.51206-0.10053 0.60163
   5  10   5    8.33    1.55   0 0.96791-0.60452-0.22079 0.69360-0.09105 0.37346
   5  11  -7    0.01    2.09   0 0.97438-0.62506-0.20181 0.72137-0.06936-0.30690
   5  11   3   60.24    1.60   0 0.96713-0.60574-0.22290 0.74214-0.09347 0.26665
   5  12  -4    0.13    1.79   0 0.97706-0.62332-0.19302 0.76702-0.05938-0.15426
   5  12  -3    1.29    1.58   0 0.96950-0.61579-0.21635 0.78346-0.08596-0.07213
   5  12  -2   17.75    1.82   0 0.96805-0.61236-0.22040 0.78823-0.09060-0.00902
   5  12  -1   34.09    1.94   0 0.96885-0.61233-0.21819 0.78619-0.08807 0.04303
   5  12   0    1.63    1.75   0 0.97035-0.61259-0.21393 0.78103-0.08320 0.09090
   6   0  13   -0.68    1.86   0 0.96951-0.52659-0.21632 0.21964-0.08593 0.80851
   6   3  12    3.30    1.79   0 0.96920-0.52683-0.21719 0.36059-0.08693 0.75644
   6   5  11   -0.34    1.63   0 0.96881-0.52812-0.21828 0.45756-0.08818 0.70168
   6   7  10   24.67    1.71   0 0.97154-0.53220-0.21047 0.54079-0.07924 0.63718
   6   8   9    1.01    1.59   0 0.96976-0.53039-0.21562 0.59492-0.08512 0.58945
   6   9   8    1.46    1.69   0 0.96865-0.52998-0.21874 0.64475-0.08869 0.53594
   6  10   7   28.96    1.81   0 0.97005-0.53345-0.21480 0.68696-0.08419 0.47801
   6  11   5    7.61    1.26   0 0.96503-0.52960-0.22849 0.74753-0.09988 0.38456
   6  12  -7   -0.38    1.69   0 0.96861-0.54996-0.21884 0.78589-0.08882-0.28969
   6  12   3    6.91    1.38   0 0.96535-0.53255-0.22765 0.79434-0.09892 0.27406
   6  12   4    0.46    1.62   0 0.97160-0.53758-0.21027 0.77781-0.07902 0.30793
   6  13  -4    7.17    1.87   0 0.97093-0.54584-0.21226 0.82815-0.08128-0.12597
   6  13  -3    0.25    1.74   0 0.96754-0.54275-0.22179 0.83621-0.09219-0.06493
   6  13  -2   51.74    1.89   0 0.96630-0.53942-0.22514 0.83991-0.09604-0.00139
   6  13  -1    0.75    1.74   0 0.96801-0.54006-0.22051 0.83766-0.09073 0.04395
   6  13   0    3.42    1.87   0 0.96952-0.54053-0.21630 0.83236-0.08591 0.09481
   6  13   1    1.80    1.52   0 0.97032-0.54068-0.21401 0.82412-0.08329 0.14561
   7   8  10    4.13    1.89   0 0.96953-0.45767-0.21629 0.59634-0.08589 0.64701
   7   9   9    0.71    1.33   0 0.96724-0.45606-0.22262 0.64874-0.09315 0.59648
   7  10   8    4.16    1.35   0 0.96744-0.45745-0.22207 0.69548-0.09251 0.54099
   7  11   7    6.04    1.77   0 0.96972-0.46163-0.21572 0.73656-0.08524 0.48067
   7  12   5   14.55    1.43   0 0.96545-0.45935-0.22738 0.79343-0.09860 0.38483
   7  13   3   -0.47    1.29   0 0.96640-0.46388-0.22486 0.83936-0.09572 0.26697
   7  14  -3   -0.13    2.02   0 0.97015-0.47328-0.21449 0.87714-0.08384-0.07017
   7  14  -2    0.80    1.95   0 0.96976-0.47179-0.21562 0.87991-0.08512-0.01405
   7  14  -1    2.32    1.76   0 0.96961-0.47050-0.21604 0.87907-0.08561 0.04092
   7  14   0   -1.31    1.86   0 0.97030-0.47112-0.21407 0.87439-0.08336 0.09044
   0  -9  -2  215.99    2.51   0 0.97277-0.97712-0.20580-0.21720-0.07614-0.03419
   0  -9  -1   74.82    1.82   0 0.97295-0.97626-0.20523-0.21774-0.07550 0.02008
   0  -8  -4  102.09    1.76   0 0.97221-0.97901-0.20749-0.16839-0.07807-0.14212
   0  -8  -3   12.98    1.62   0 0.97689-0.98051-0.19261-0.18368-0.06116-0.10202
   0  -8  -2  415.53    3.64   0 0.97800-0.98270-0.18881-0.18752-0.05685-0.05169
   0  -8   0  471.64    4.33   0 0.97797-0.98017-0.18889-0.18692-0.05694 0.05809
   0  -8   1   48.55    1.88   0 0.97378-0.97472-0.20269-0.17309-0.07260 0.12680
   0  -7  -4    0.97    1.51   0 0.97701-0.98180-0.19220-0.13659-0.06069-0.15735
   0  -6  -5    6.80    1.17   0 0.97351-0.98079-0.20354-0.07871-0.07357-0.20102
   0  -6   2 1123.94    9.42   0 0.97979-0.97919-0.18239-0.09827-0.04958 0.15975
   0  -5  -5    3.44    1.16   0 0.97494-0.98208-0.19901-0.03640-0.06842-0.20628
   0  -4  -5    0.56    1.19   0 0.97529-0.98227-0.19787 0.00919-0.06713-0.20739
   0  -3  -5    3.72    1.29   0 0.97414-0.98082-0.20156 0.06129-0.07132-0.20375
   0  -1  -4  279.43    3.44   0 0.97369-0.97838-0.20297 0.15743-0.07293-0.14847
   0   0  -2  292.25    5.70   0 0.97824-0.98034-0.18795 0.18926-0.05588-0.05528
   1 -13  -4    3.49    1.30   0 0.97211-0.90837-0.20777-0.40490-0.07839-0.13977
   1 -13  -3   87.77    1.87   0 0.97459-0.91023-0.20014-0.41206-0.06971-0.09277
   1 -13  -2   30.91    2.04   0 0.97691-0.90945-0.19254-0.41968-0.06107-0.04372
   1 -13  -1   38.71    1.92   0 0.97697-0.90925-0.19232-0.41979-0.06083 0.01094
   1 -13   0   43.03    1.96   0 0.97622-0.90706-0.19486-0.41675-0.06371 0.06698
   1 -12  -5    1.12    1.13   0 0.97547-0.91263-0.19731-0.36806-0.06649-0.20604
   1 -12   2   40.99    2.06   0 0.97893-0.90849-0.18550-0.37849-0.05310 0.16778
   1 -11  -6   72.59    2.00   0 0.97700-0.91437-0.19223-0.32690-0.06073-0.26403
   1 -10  -7    8.35    1.54   0 0.97674-0.91410-0.19311-0.27781-0.06173-0.31860
   1  -9  -8    1.05    1.14   0 0.97332-0.91378-0.20410-0.22004-0.07421-0.36332
   1  -8  -8    3.55    1.51   0 0.97697-0.91692-0.19232-0.18404-0.06082-0.37548
   1  -6  -9   11.20    1.21   0 0.97314-0.91408-0.20467-0.07799-0.07486-0.41781
   1  -5  -9    6.34    1.26   0 0.97405-0.91514-0.20184-0.03354-0.07164-0.42110
   1  -4  -9   98.70    1.93   0 0.97441-0.91413-0.20071 0.01213-0.07035-0.42408
   1  -3  -9   52.43    1.60   0 0.97351-0.91358-0.20354 0.06264-0.07357-0.42005
   1  -1   6 2140.82    8.89   0 0.97707-0.89966-0.19198 0.14803-0.06044 0.39015
   1   0  -8    0.53    1.69   0 0.97589-0.91386-0.19593 0.19620-0.06492-0.37194
   1   1   5  458.11    4.13   0 0.97691-0.90161-0.19252 0.24313-0.06106 0.33564
   1   3   3    2.74    1.53   0 0.97174-0.89696-0.20890 0.35004-0.07968 0.24521
   1   4  -4    6.93    3.70   0 0.99214-0.92356-0.12009 0.30876 0.02013-0.24019
   1   4   2  690.02    5.17   0 0.97709-0.90256-0.19192 0.38266-0.06037 0.16928
   2 -16  -3    2.03    1.23   0 0.97249-0.83703-0.20664-0.54730-0.07711-0.08408
   2 -16  -2   13.50    1.31   0 0.97387-0.83726-0.20240-0.55083-0.07228-0.03250
   2 -16  -1   -0.67    1.24   0 0.97387-0.83608-0.20240-0.55134-0.07228 0.02325
   2 -16   0   20.92    1.53   0 0.97277-0.83367-0.20580-0.54763-0.07614 0.08120
   2 -15  -5   21.82    2.01   0 0.97556-0.84147-0.19702-0.51136-0.06617-0.20389
   2 -15  -4    0.10    1.86   0 0.97849-0.84453-0.18708-0.51999-0.05489-0.16171
   2 -15   2    3.72    2.17   0 0.97755-0.83694-0.19037-0.51771-0.05861 0.17200
   2 -14  -7   15.38    1.32   0 0.97378-0.84366-0.20269-0.45620-0.07260-0.30724
   2 -14  -6    0.09    1.57   0 0.97772-0.84689-0.18978-0.47388-0.05795-0.26703
   2 -14   4    0.32    1.83   0 0.97712-0.83330-0.19182-0.46813-0.06026 0.28330
   2 -13  -8    0.26    1.17   0 0.97432-0.84476-0.20099-0.41323-0.07067-0.36260
   2 -13   5    0.23    2.37   0 0.98121-0.83586-0.17702-0.43544-0.04352 0.32228
   2 -12  -9    1.36    1.21   0 0.97341-0.84440-0.20382-0.36134-0.07389-0.41681
   2 -12   6    7.01    2.23   0 0.97981-0.83412-0.18231-0.38072-0.04950 0.38570
   2 -11  -9    0.61    1.72   0 0.97701-0.85006-0.19220-0.32832-0.06069-0.43280
   2 -10 -10   -0.56    1.18   0 0.97494-0.84735-0.19901-0.27416-0.06842-0.47487
   2  -9 -10   17.45    1.66   0 0.97841-0.85062-0.18736-0.23871-0.05521-0.48823
   2  -9   8   17.81    3.42   0 0.98996-0.84262-0.13527-0.28398 0.00327 0.44255
   2  -8 -11    1.97    1.21   0 0.97286-0.84549-0.20551-0.17100-0.07582-0.52479
   2  -7 -11    1.40    1.15   0 0.97512-0.84757-0.19844-0.13093-0.06778-0.53290
   2  -6 -11   11.03    1.74   0 0.97701-0.84921-0.19220-0.09212-0.06069-0.53828
   2  -5 -11   83.25    2.20   0 0.97782-0.85011-0.18941-0.04892-0.05753-0.54234
   2  -4 -11   11.86    1.82   0 0.97817-0.85023-0.18821-0.00269-0.05618-0.54404
   2  -3 -11   65.76    2.25   0 0.97774-0.84958-0.18969 0.04548-0.05785-0.54273
   2  -2 -11    9.13    1.87   0 0.97701-0.84719-0.19220 0.09588-0.06069-0.53936
   2  -1 -11   13.38    1.44   0 0.97351-0.84419-0.20354 0.15666-0.07357-0.52886
   2   0   8    9.80    1.31   0 0.97423-0.82404-0.20127 0.20238-0.07100 0.51017
   2   1 -10   24.25    1.79   0 0.97843-0.84809-0.18730 0.23219-0.05514-0.49181
   2   2   7  248.25    2.59   0 0.97258-0.82214-0.20636 0.30194-0.07679 0.46265
   2   3  -9   -1.23    1.74   0 0.97730-0.84631-0.19120 0.33106-0.05956-0.43155
   2   4   6   75.95    2.01   0 0.97734-0.82726-0.19106 0.38319-0.05940 0.38945
   2   5   5   30.15    1.76   0 0.97700-0.82813-0.19223 0.43115-0.06073 0.33564
   2   7   1   64.88    1.82   0 0.97314-0.82798-0.20467 0.53630-0.07486 0.13192
   2   7   2   68.04    2.07   0 0.97849-0.83216-0.18709 0.51949-0.05490 0.16477
   3 -17   3    2.74    1.76   0 0.97529-0.76143-0.19790-0.60104-0.06717 0.23635
   3 -14  -9   -0.59    1.54   0 0.97768-0.77917-0.18992-0.47390-0.05811-0.43081
   3 -13 -10   -1.01    1.78   0 0.97714-0.77923-0.19177-0.42299-0.06021-0.48211
   3 -12 -11    3.24    1.38   0 0.97485-0.77735-0.19929-0.36579-0.06874-0.53059
   3 -10 -12    1.20    1.30   0 0.97468-0.77795-0.19986-0.27081-0.06939-0.58488
   3  -9 -12   -1.88    1.67   0 0.97747-0.78183-0.19063-0.23626-0.05892-0.59473
   3  -7 -13   -1.02    1.30   0 0.97314-0.77777-0.20467-0.12725-0.07486-0.63241
   3  -6 -13    1.25    1.34   0 0.97459-0.77814-0.20014-0.08175-0.06971-0.63934
   3  -5 -13   -2.34    1.71   0 0.97620-0.77965-0.19490-0.04203-0.06375-0.64118
   3  -4 -13   -2.85    1.96   0 0.97629-0.77929-0.19461 0.00439-0.06343-0.64274
   3  -3 -13   -0.16    1.65   0 0.97608-0.77900-0.19532 0.05240-0.06423-0.64062
   3  -2 -13   10.27    1.36   0 0.97351-0.77659-0.20354 0.10864-0.07357-0.63597
   3  -1  10   17.12    1.44   0 0.97332-0.74967-0.20410 0.15752-0.07421 0.62603
   3   0  10   -0.58    1.85   0 0.97743-0.75268-0.19078 0.19180-0.05908 0.61276
   3   1 -12    3.80    2.31   0 0.97749-0.77793-0.19056 0.23890-0.05883-0.59569
   3   2   9    2.35    1.25   0 0.97305-0.74822-0.20495 0.30025-0.07518 0.57386
   3   3 -11    1.23    1.96   0 0.97936-0.77851-0.18394 0.32677-0.05134-0.54965
   3   4   8   41.01    1.51   0 0.97423-0.75138-0.20127 0.39087-0.07100 0.51293
   3   8   4    3.14    1.57   0 0.97687-0.75801-0.19266 0.57433-0.06121 0.28586
   3   9   1   25.66    1.39   0 0.97221-0.75515-0.20749 0.63356-0.07807 0.13726
   3   9   2    0.11    1.57   0 0.97697-0.76039-0.19234 0.61724-0.06085 0.17381
   4 -10  11    3.88    2.52   0 0.98390-0.69106-0.16605-0.30161-0.03117 0.64396
   4  -5  12    8.54    1.68   0 0.97945-0.68293-0.18364-0.04823-0.05100 0.71471
   4  -4  12    0.00    1.77   0 0.97701-0.67720-0.19220 0.00537-0.06069 0.72145
   4  -3  12    6.16    1.69   0 0.97960-0.68264-0.18308 0.04462-0.05037 0.71475
   4  -1 -14   -1.38    1.93   0 0.97714-0.71072-0.19177 0.14331-0.06021-0.70269
   4   0 -14    2.38    1.37   0 0.97405-0.70661-0.20184 0.20328-0.07164-0.69134
   4   1  11   -1.13    1.65   0 0.97608-0.67880-0.19532 0.24555-0.06423 0.67645
   4   3  10   34.56    1.43   0 0.97221-0.67627-0.20749 0.34998-0.07807 0.63200
   4   4  10   -0.11    1.64   0 0.97841-0.68157-0.18736 0.37750-0.05521 0.61032
   4   5   9  189.02    2.25   0 0.97369-0.67811-0.20297 0.43983-0.07293 0.57185
   4   6 -11   -0.91    1.82   0 0.97701-0.70533-0.19220 0.47442-0.06069-0.53819
   4   7 -10    0.67    2.20   0 0.98588-0.71073-0.15715 0.48559-0.02118-0.52037
   4   9   5   24.38    1.32   0 0.97351-0.68146-0.20354 0.62897-0.07357 0.35384
   4  10   3  316.50    2.84   0 0.97268-0.68247-0.20608 0.67910-0.07646 0.24695
   4  10   4    0.46    1.52   0 0.97849-0.68710-0.18708 0.66047-0.05489 0.28048
   4  11  -3    4.56    1.71   0 0.97726-0.69403-0.19134 0.71132-0.05972-0.10018
   4  11  -2   80.92    2.31   0 0.97506-0.69062-0.19863 0.71943-0.06799-0.03469
   4  11  -1   89.64    2.21   0 0.97473-0.68905-0.19969 0.72034-0.06920 0.02099
   4  11   0    6.93    1.64   0 0.97638-0.68993-0.19432 0.71555-0.06310 0.06876
   4  11   1  222.67    3.03   0 0.97829-0.69034-0.18777 0.70855-0.05567 0.11344
   5  -6  13    0.93    2.00   0 0.97897-0.60991-0.18537-0.09599-0.05295 0.77413
   5  -5  13   21.36    2.20   0 0.97759-0.60808-0.19021-0.04197-0.05843 0.78007
   5  -4  13   19.37    1.98   0 0.97732-0.60856-0.19113 0.00641-0.05948 0.78057
   5  -3  13    0.06    1.78   0 0.97776-0.60806-0.18964 0.04979-0.05779 0.77925
   5  -2  13   -0.16    1.62   0 0.97701-0.60593-0.19220 0.09969-0.06069 0.77601
   5   1  12    2.87    1.28   0 0.97268-0.60205-0.20608 0.25486-0.07646 0.74287
   5   2  12   36.60    1.97   0 0.97724-0.60805-0.19142 0.29036-0.05980 0.72475
   5   3 -14   -1.53    2.01   0 0.97784-0.63953-0.18935 0.33070-0.05747-0.70573
   5   4  11   35.75    1.60   0 0.97494-0.60886-0.19901 0.38845-0.06842 0.67696
   5   5 -13   -0.00    1.98   0 0.98100-0.63882-0.17783 0.41415-0.04443-0.65958
   5   6  10   18.44    1.71   0 0.97697-0.60948-0.19233 0.47959-0.06084 0.61595
   5   7   9   17.67    1.29   0 0.97387-0.60717-0.20240 0.53350-0.07228 0.57309
   5   8   8    2.04    1.26   0 0.97268-0.60557-0.20608 0.58512-0.07646 0.52311
   5   9   7   75.87    1.64   0 0.97314-0.60766-0.20467 0.63032-0.07486 0.46618
   5  10   6    3.06    1.53   0 0.97606-0.61094-0.19536 0.67085-0.06428 0.40238
   5  11   4   14.71    1.38   0 0.97351-0.61107-0.20354 0.72388-0.07357 0.30020
   5  12  -5   27.60    2.39   0 0.98094-0.62907-0.17808 0.74533-0.04472-0.22298
   5  12   1    4.55    1.29   0 0.97323-0.61406-0.20438 0.77170-0.07453 0.13722
   5  12   2   24.06    1.95   0 0.97709-0.61770-0.19191 0.76044-0.06037 0.17500
   6   1  13    0.31    1.33   0 0.97332-0.53081-0.20410 0.25496-0.07421 0.79606
   6   2  13    1.81    1.87   0 0.97743-0.53538-0.19078 0.28723-0.05908 0.78187
   6   4  12    9.84    1.34   0 0.97441-0.53436-0.20071 0.39060-0.07035 0.73676
   6   6  11    2.90    1.30   0 0.97503-0.53344-0.19872 0.48352-0.06810 0.68071
   6   9   9    1.86    1.79   0 0.97766-0.53824-0.18999 0.61609-0.05818 0.56064
   6  10   8   -1.11    1.72   0 0.97808-0.53982-0.18850 0.66230-0.05650 0.50452
   6  11   6    1.98    1.15   0 0.97286-0.53641-0.20551 0.72620-0.07582 0.41389
   6  12   5    0.18    1.81   0 0.97734-0.54204-0.19106 0.75926-0.05940 0.34273
   6  13  -5   13.42    1.97   0 0.97702-0.55351-0.19215 0.80775-0.06064-0.20307
   6  13   2    2.64    1.60   0 0.97610-0.54370-0.19523 0.81358-0.06413 0.18327
   7  10   9   -0.63    1.83   0 0.97672-0.46715-0.19319 0.66896-0.06182 0.56535
   7  11   8   20.92    1.89   0 0.97724-0.46814-0.19141 0.71356-0.05979 0.50789
   7  12   6   11.59    1.45   0 0.97277-0.46445-0.20580 0.77326-0.07614 0.41746
   7  13   4    8.19    1.41   0 0.97221-0.46704-0.20749 0.82231-0.07807 0.30898
   7  13   5    8.12    1.98   0 0.97766-0.47123-0.18996 0.80622-0.05815 0.34215
   7  14   1    0.60    1.31   0 0.97314-0.47102-0.20467 0.86691-0.07486 0.13977
   7  14   2    9.41    1.94   0 0.97692-0.47547-0.19251 0.85642-0.06105 0.18041
   0  -8  -1   47.80    1.69   0 0.97891-0.98234-0.18489-0.19112-0.05379-0.00070
   0  -7  -3  585.25    3.84   0 0.97978-0.98544-0.18176-0.14746-0.05024-0.11428
   0  -7  -2  758.76    4.79   0 0.98300-0.98660-0.16929-0.15979-0.03611-0.07325
   0  -7  -1    5.23    1.88   0 0.98404-0.98727-0.16490-0.16422-0.03116-0.02325
   0  -7   0   -0.96    1.98   0 0.98347-0.98563-0.16733-0.16425-0.03391 0.03550
   0  -7   1    6.07    1.83   0 0.98111-0.98185-0.17677-0.15166-0.04458 0.09920
   0  -6  -4   15.38    1.28   0 0.97875-0.98536-0.18546-0.09668-0.05444-0.16505
   0  -6  -3   56.83    2.06   0 0.98309-0.98830-0.16891-0.11322-0.03569-0.12895
   0  -5  -4  137.84    2.13   0 0.98070-0.98697-0.17834-0.05683-0.04636-0.17361
   0  -4  -4   66.54    2.12   0 0.98292-0.98668-0.16959-0.01843-0.03646-0.18338
   0  -3  -4    4.76    1.36   0 0.98137-0.98702-0.17577 0.03503-0.04345-0.17674
   0  -2  -4  223.22    3.01   0 0.97915-0.98457-0.18404 0.09071-0.05282-0.16765
   0  -1  -3  601.87    5.73   0 0.98298-0.98580-0.16936 0.12328-0.03619-0.12948
   0   0  -1   -0.49    2.89   0 0.98370-0.98546-0.16633 0.16476-0.03278-0.02288
   1 -12  -4    4.56    1.25   0 0.97867-0.91590-0.18575-0.37952-0.05476-0.16353
   1 -12  -3   65.62    1.97   0 0.98231-0.91592-0.17207-0.39305-0.03926-0.12139
   1 -12  -2   17.91    1.76   0 0.98343-0.91806-0.16750-0.39774-0.03409-0.07226
   1 -12  -1    2.82    1.59   0 0.98444-0.91735-0.16318-0.40284-0.02922-0.02418
   1 -12   0   43.23    1.94   0 0.98431-0.91662-0.16375-0.40099-0.02986 0.03345
   1 -12   1    2.94    1.64   0 0.98302-0.91362-0.16920-0.39546-0.03602 0.09281
   1 -11  -5   35.31    1.37   0 0.98085-0.91890-0.17777-0.34116-0.04571-0.22583
   1 -11   3    3.33    1.67   0 0.98365-0.91198-0.16657-0.35065-0.03305 0.20091
   1 -10  -6   24.32    1.32   0 0.98115-0.91997-0.17663-0.29575-0.04442-0.28245
   1 -10   4  137.99    3.59   0 0.98735-0.91396-0.14947-0.31927-0.01380 0.23672
   1  -9  -7   34.93    1.34   0 0.97978-0.91995-0.18176-0.24280-0.05024-0.33127
   1  -9   5  283.00    6.61   0 0.98573-0.91121-0.15736-0.26396-0.02266 0.30049
   1  -8  -7   -1.77    1.51   0 0.98312-0.92300-0.16877-0.20991-0.03553-0.34540
   1  -7  -8   44.88    1.44   0 0.97931-0.92005-0.18347-0.14699-0.05218-0.38485
   1  -6  -8   21.26    1.36   0 0.98130-0.92117-0.17606-0.10864-0.04377-0.39484
   1  -5  -8   32.27    1.78   0 0.98302-0.92240-0.16920-0.06719-0.03601-0.40097
   1  -4  -8  115.27    2.15   0 0.98362-0.92300-0.16668-0.02271-0.03317-0.40420
   1  -3  -8   39.06    1.78   0 0.98350-0.92283-0.16721 0.02504-0.03377-0.40387
   1  -2  -8  171.84    2.62   0 0.98300-0.92082-0.16925 0.07419-0.03608-0.40168
   1  -1  -8  239.61    2.69   0 0.97994-0.91907-0.18119 0.13346-0.04959-0.38880
   1   0   6    0.49    2.09   0 0.98247-0.90414-0.17142 0.17127-0.03852 0.36967
   1   1  -7    9.96    1.82   0 0.98302-0.91873-0.16920 0.21606-0.03601-0.34712
   1   2   5    5.53    1.86   0 0.98370-0.90602-0.16633 0.26414-0.03278 0.30718
   1   3   4  689.47    4.74   0 0.98300-0.90731-0.16929 0.31356-0.03612 0.25502
   1   5  -1  465.46    5.57   0 0.98308-0.91180-0.16896 0.40585-0.03574-0.01960
   1   5   0  220.71    3.70   0 0.98356-0.91094-0.16695 0.40440-0.03347 0.03283
   2 -15  -3   21.12    1.41   0 0.98078-0.84621-0.17806-0.52880-0.04604-0.11278
   2 -15  -2    0.80    1.63   0 0.98302-0.84562-0.16920-0.53563-0.03601-0.07036
   2 -15  -1    5.72    1.66   0 0.98316-0.84580-0.16862-0.53790-0.03536-0.01374
   2 -15   0    3.15    1.80   0 0.98294-0.84431-0.16953-0.53723-0.03639 0.03886
   2 -15   1  111.52    2.62   0 0.98194-0.84118-0.17355-0.53150-0.04094 0.10260
   2 -14  -5    9.33    1.82   0 0.98302-0.84783-0.16920-0.48975-0.03601-0.23182
   2 -14   3   70.79    2.33   0 0.98502-0.84278-0.16059-0.49758-0.02630 0.19745
   2 -13  -7   17.54    1.31   0 0.97963-0.84940-0.18233-0.43138-0.05088-0.32841
   2 -13  -6   10.25    1.61   0 0.98405-0.85271-0.16487-0.44851-0.03113-0.29340
   2 -12  -8   -0.34    1.15   0 0.97947-0.85036-0.18290-0.38336-0.05153-0.38331
   2 -11  -8    2.07    1.56   0 0.98342-0.85477-0.16751-0.35164-0.03411-0.40411
   2 -10  -9   16.13    1.67   0 0.98300-0.85069-0.16926-0.30207-0.03608-0.45149
   2  -8 -10    0.58    1.15   0 0.98107-0.85319-0.17691-0.19872-0.04474-0.50234
   2  -7 -10   21.08    1.68   0 0.98356-0.85536-0.16696-0.16427-0.03349-0.51109
   2  -6   9   47.39    2.62   0 0.98638-0.83633-0.15425-0.12502-0.01916 0.51663
   2  -5   9   26.20    2.02   0 0.98300-0.83233-0.16926-0.06304-0.03608 0.53308
   2  -4   9   -1.39    1.82   0 0.98210-0.83065-0.17292-0.01466-0.04022 0.53864
   2  -3   9  120.70    2.64   0 0.98280-0.83282-0.17010 0.03278-0.03704 0.53419
   2  -2   9   56.04    2.06   0 0.98315-0.83123-0.16866 0.07784-0.03540 0.53174
   2   0 -10    0.76    1.71   0 0.98323-0.85286-0.16834 0.16911-0.03504-0.51077
   2   1   8  213.60    2.49   0 0.97978-0.82782-0.18176 0.23200-0.05024 0.49076
   2   3   7  334.37    2.84   0 0.97994-0.82837-0.18119 0.32564-0.04959 0.43464
   2   4  -8   54.75    2.42   0 0.98342-0.84982-0.16755 0.35487-0.03415-0.40391
   2   5  -7    0.44    1.90   0 0.98743-0.85211-0.14902 0.38501-0.01329-0.36796
   2   6   4  155.23    2.13   0 0.97891-0.83028-0.18489 0.47039-0.05379 0.27393
   2   7   3  605.68    4.03   0 0.98342-0.83569-0.16752 0.50004-0.03411 0.19903
   3 -17  -3   -0.31    1.73   0 0.98302-0.77612-0.16920-0.62563-0.03601-0.12280
   3 -17  -2   -1.17    1.78   0 0.98302-0.77667-0.16920-0.63189-0.03601-0.06776
   3 -17  -1    2.30    1.98   0 0.98339-0.77615-0.16767-0.63460-0.03429-0.01691
   3 -17   0    0.54    1.83   0 0.98302-0.77487-0.16920-0.63373-0.03601 0.03883
   3 -17   1    0.03    1.90   0 0.98274-0.77222-0.17034-0.62899-0.03731 0.09788
   3 -17   2   -1.44    1.50   0 0.97947-0.76827-0.18290-0.61752-0.05153 0.16614
   3 -16  -6    0.59    1.37   0 0.98047-0.77871-0.17920-0.57501-0.04733-0.27671
   3 -16  -5   39.47    2.25   0 0.98397-0.78080-0.16519-0.58898-0.03149-0.23634
   3 -16   4    0.79    1.71   0 0.98188-0.76757-0.17377-0.58048-0.04119 0.26368
   3 -15  -7    2.05    1.81   0 0.98269-0.78159-0.17053-0.53527-0.03752-0.34375
   3 -14  -8    0.95    1.70   0 0.98338-0.78356-0.16769-0.49201-0.03431-0.40140
   3 -13  -9    0.19    1.75   0 0.98336-0.78379-0.16776-0.44427-0.03439-0.45481
   3 -12 -10   -0.26    1.62   0 0.98302-0.78298-0.16920-0.39135-0.03601-0.50351
   3 -11 -11   -0.91    1.32   0 0.97891-0.78245-0.18489-0.33429-0.05379-0.54467
   3 -10 -11   -0.34    1.63   0 0.98274-0.78535-0.17034-0.30177-0.03731-0.55957
   3  -9  10    0.07    2.27   0 0.98486-0.76096-0.16131-0.26164-0.02711 0.57892
   3  -8 -12    0.31    1.20   0 0.98032-0.78461-0.17977-0.19807-0.04798-0.60563
   3  -7 -12   -0.30    1.66   0 0.98274-0.78607-0.17034-0.16064-0.03731-0.61478
   3  -6 -12   40.05    1.97   0 0.98421-0.78695-0.16418-0.12092-0.03035-0.62268
   3  -4  11   31.26    1.82   0 0.98531-0.76053-0.15928-0.02576-0.02482 0.63238
   3  -3  11   17.36    1.68   0 0.98521-0.75986-0.15973 0.02212-0.02533 0.63301
   3  -1 -12   45.35    2.03   0 0.98411-0.78598-0.16461 0.11495-0.03083-0.62351
   3   0 -12   -2.41    1.74   0 0.98224-0.78381-0.17234 0.17119-0.03957-0.61255
   3   1  10    7.28    1.35   0 0.98115-0.75639-0.17663 0.22548-0.04442 0.59606
   3   3   9   34.88    1.45   0 0.97915-0.75416-0.18404 0.32894-0.05282 0.54961
   3   5   8    1.91    1.22   0 0.98145-0.75714-0.17549 0.41173-0.04313 0.48739
   3   6   7   -0.92    1.14   0 0.97978-0.75707-0.18176 0.46503-0.05024 0.43832
   3   7   6   18.77    1.29   0 0.98009-0.75789-0.18062 0.51364-0.04895 0.38056
   3   8   5   21.73    1.70   0 0.98295-0.76401-0.16947 0.55047-0.03632 0.31327
   3   9  -5    5.39    2.11   0 0.98565-0.77631-0.15770 0.58246-0.02304-0.24771
   3   9   3  137.44    2.06   0 0.98145-0.76300-0.17549 0.60161-0.04313 0.20939
   4  -7  12   13.39    1.94   0 0.98483-0.68819-0.16145-0.16584-0.02727 0.69218
   4  -6  12   -0.27    1.72   0 0.98145-0.68378-0.17549-0.10755-0.04313 0.70734
   4  -5 -14   -0.82    1.41   0 0.97994-0.71486-0.18119-0.05463-0.04959-0.71267
   4  -4 -14   -1.24    1.44   0 0.98024-0.71507-0.18005-0.00860-0.04830-0.71430
   4  -3 -14    1.22    1.39   0 0.98009-0.71357-0.18062 0.04216-0.04895-0.71432
   4  -2 -14   -2.61    1.43   0 0.97915-0.71343-0.18404 0.08986-0.05282-0.70969
   4  -2  12    0.30    1.23   0 0.98055-0.68210-0.17891 0.08640-0.04701 0.71080
   4  -1  12    8.43    1.69   0 0.98298-0.68610-0.16935 0.12605-0.03619 0.70088
   4   0  12   -0.53    1.58   0 0.98463-0.68599-0.16231 0.16378-0.02824 0.69310
   4   1 -13   -0.54    1.69   0 0.98397-0.71628-0.16518 0.21231-0.03148-0.67885
   4   2 -13   -1.91    1.93   0 0.98163-0.71290-0.17477 0.26791-0.04232-0.66179
   4   2  11    2.13    1.29   0 0.97955-0.68114-0.18262 0.27722-0.05121 0.66127
   4   3  11  131.50    2.40   0 0.98377-0.68605-0.16604 0.31207-0.03245 0.64051
   4   4 -12    0.39    1.73   0 0.98246-0.71179-0.17149 0.36308-0.03860-0.61429
   4   5  10    0.81    1.61   0 0.98370-0.68617-0.16633 0.40367-0.03278 0.58774
   4   6   9   12.17    1.23   0 0.98070-0.68436-0.17834 0.46369-0.04636 0.54477
   4   7   8   24.91    1.39   0 0.97899-0.68343-0.18461 0.51764-0.05347 0.49618
   4   8   7    7.54    1.25   0 0.97883-0.68409-0.18518 0.56452-0.05412 0.44252
   4   9   6    5.67    1.22   0 0.98040-0.68656-0.17948 0.60511-0.04765 0.38262
   4  10   5   27.36    1.67   0 0.98355-0.69067-0.16700 0.64168-0.03353 0.31136
   4  11  -4    7.08    1.88   0 0.98267-0.70102-0.17061 0.69091-0.03761-0.17681
   4  11   2   16.60    1.46   0 0.98115-0.69176-0.17663 0.69754-0.04442 0.15764
   4  11   3   -1.72    1.64   0 0.98374-0.69408-0.16619 0.68301-0.03261 0.20112
   5  -1  13   10.81    1.46   0 0.98040-0.61040-0.17948 0.13543-0.04765 0.76650
   5   0  13    2.46    1.83   0 0.98302-0.61217-0.16918 0.17090-0.03599 0.75790
   5   2 -14   -2.43    2.01   0 0.98370-0.64594-0.16633 0.26111-0.03278-0.72992
   5   3  12    0.01    1.39   0 0.98122-0.61081-0.17634 0.31966-0.04410 0.70956
   5   5  11    2.39    1.19   0 0.98047-0.61020-0.17920 0.41572-0.04733 0.65904
   5   7  10    6.38    1.73   0 0.98300-0.61431-0.16927 0.50263-0.03610 0.59211
   5   8   9    1.68    1.17   0 0.98122-0.61268-0.17634 0.55473-0.04410 0.54631
   5   9   8   10.66    1.27   0 0.98093-0.61402-0.17749 0.60441-0.04539 0.49029
   5  10   7    0.35    1.66   0 0.98302-0.61746-0.16920 0.64617-0.03601 0.43032
   5  11   5    0.29    1.20   0 0.97923-0.61604-0.18376 0.70397-0.05250 0.33345
   5  11   6    2.06    1.54   0 0.98352-0.61808-0.16711 0.68367-0.03366 0.36873
   5  12   3   31.30    1.54   0 0.98040-0.61891-0.17948 0.74747-0.04765 0.21751
   5  12   4    2.04    1.57   0 0.98424-0.62100-0.16404 0.73220-0.03019 0.25744
   6   3  13    3.05    1.40   0 0.98100-0.53756-0.17720 0.31933-0.04507 0.76743
   6   5  12   -0.22    1.36   0 0.97970-0.53784-0.18205 0.42007-0.05056 0.71747
   6   6  12    1.92    1.58   0 0.98379-0.54134-0.16599 0.44899-0.03239 0.69716
   6   7  11    2.31    1.34   0 0.98107-0.53913-0.17691 0.50798-0.04474 0.65777
   6   8  10   -0.23    1.21   0 0.97883-0.53886-0.18518 0.56438-0.05412 0.61096
   6  11   7    5.87    1.28   0 0.97955-0.54207-0.18262 0.70321-0.05121 0.44376
   6  12  -8    0.21    2.51   0 0.99097-0.57187-0.12842 0.69595 0.00976-0.44182
   6  12   6    0.91    1.82   0 0.98282-0.54619-0.17000 0.73936-0.03692 0.37630
   6  13  -6    0.07    1.92   0 0.98748-0.56527-0.14881 0.76645-0.01305-0.30970
   6  13   3   47.49    1.71   0 0.97891-0.54633-0.18489 0.80038-0.05379 0.22533
   6  13   4   87.56    2.41   0 0.98302-0.55039-0.16920 0.78576-0.03601 0.26198
   6  14  -2    2.14    1.89   0 0.98425-0.55637-0.16399 0.82597-0.03013-0.07026
   6  14  -1   10.10    1.94   0 0.98370-0.55476-0.16633 0.82909-0.03278-0.01513
   6  14   0    1.29    1.78   0 0.98397-0.55385-0.16518 0.82804-0.03148 0.04066
   7  12   7    1.08    1.29   0 0.97915-0.46979-0.18404 0.75186-0.05282 0.44821
   7  14   3    2.46    1.35   0 0.97963-0.47470-0.18233 0.84506-0.05088 0.22687
   0  -6  -2 1036.06    5.43   0 0.98612-0.99030-0.15514-0.12639-0.02101-0.08943
   0  -6  -1 1809.01    7.99   0 0.98806-0.99114-0.14541-0.13602-0.01001-0.04571
   0  -6   0    0.98    1.91   0 0.98810-0.99054-0.14518-0.13943-0.00975 0.00920
   0  -6   1 1899.94    9.98   0 0.98770-0.98783-0.14726-0.13445-0.01210 0.06628
   0  -5  -3   79.14    1.94   0 0.98538-0.99032-0.15858-0.07576-0.02490-0.14057
   0  -5  -2  383.60    3.91   0 0.98874-0.99266-0.14167-0.09254-0.00580-0.10493
   0  -5   2  408.36    6.62   0 0.98745-0.98646-0.14857-0.08551-0.01358 0.12242
   0  -4  -3    1.42    1.36   0 0.98671-0.99141-0.15227-0.03587-0.01776-0.14807
   0  -3  -3  777.78    5.45   0 0.98786-0.99096-0.14646 0.00652-0.01120-0.15450
   0  -2  -3    2.41    1.71   0 0.98600-0.99010-0.15572 0.06258-0.02166-0.14362
   0  -1  -2 1028.89    8.36   0 0.98879-0.99120-0.14138 0.09601-0.00547-0.10581
   1 -11  -4    9.24    1.30   0 0.98442-0.92185-0.16288-0.35430-0.02977-0.18752
   1 -11  -3   21.17    1.75   0 0.98784-0.92138-0.14656-0.37083-0.01131-0.15102
   1 -11   2    6.26    1.71   0 0.98875-0.91877-0.14163-0.37558-0.00575 0.11731
   1 -10  -5   -0.10    1.16   0 0.98550-0.92334-0.15801-0.31401-0.02425-0.24750
   1 -10  -4  188.53    2.45   0 0.98904-0.92539-0.13998-0.33053-0.00389-0.21382
   1  -9  -6    0.90    1.10   0 0.98506-0.92363-0.16002-0.26342-0.02652-0.30257
   1  -8  -6   24.78    1.66   0 0.98833-0.92641-0.14393-0.23257-0.00835-0.31948
   1  -7  -7   40.75    1.40   0 0.98581-0.92506-0.15658-0.17294-0.02263-0.36013
   1  -6  -7   19.64    1.67   0 0.98795-0.92657-0.14600-0.13593-0.01068-0.37209
   1  -4   7  142.20    3.18   0 0.98873-0.91122-0.14175-0.04490-0.00588 0.39070
   1  -3   7  220.61    3.59   0 0.98806-0.91023-0.14541 0.00603-0.01001 0.39468
   1  -2   7    2.06    1.82   0 0.98859-0.91022-0.14253 0.04882-0.00677 0.39130
   1   0  -7   13.29    1.85   0 0.98789-0.92332-0.14627 0.14718-0.01098-0.37194
   1   1   6 2110.40    7.88   0 0.98785-0.91099-0.14649 0.19616-0.01123 0.34063
   1   2  -6  127.19    3.04   0 0.98785-0.92205-0.14652 0.24177-0.01126-0.31752
   1   4   3   90.95    2.06   0 0.98435-0.90867-0.16317 0.35354-0.03009 0.19443
   1   5  -2   67.73    3.19   0 0.98753-0.91733-0.14819 0.38546-0.01315-0.09642
   1   5   1   84.26    2.11   0 0.98594-0.91205-0.15600 0.39352-0.02198 0.07675
   2 -14  -4    2.92    1.28   0 0.98513-0.85144-0.15973-0.49940-0.02620-0.19210
   2 -14  -3   79.41    2.25   0 0.98788-0.85142-0.14635-0.51263-0.01107-0.14877
   2 -14  -2   11.80    1.65   0 0.98911-0.85317-0.13961-0.51956-0.00348-0.10208
   2 -14   2   85.47    2.43   0 0.98854-0.84817-0.14279-0.51592-0.00706 0.12127
   2 -13  -5   24.78    1.82   0 0.98790-0.85399-0.14624-0.46581-0.01094-0.25893
   2 -12  -7    4.79    1.17   0 0.98461-0.85443-0.16202-0.40198-0.02879-0.35275
   2 -12  -6   94.58    2.11   0 0.98862-0.85702-0.14232-0.42300-0.00654-0.31889
   2 -11  -7   41.65    1.82   0 0.98859-0.85793-0.14249-0.37569-0.00672-0.37340
   2 -10  -8    3.31    1.58   0 0.98772-0.85693-0.14718-0.32246-0.01201-0.42379
   2  -9  -9    2.90    1.21   0 0.98506-0.85608-0.16002-0.26258-0.02652-0.46582
   2  -8  -9    0.78    1.52   0 0.98768-0.85836-0.14739-0.22796-0.01224-0.47989
   2  -7   9   10.12    2.18   0 0.99146-0.84208-0.12464-0.20267 0.01333 0.48393
   2  -6 -10    3.78    1.21   0 0.98519-0.85703-0.15944-0.12152-0.02587-0.51978
   2  -5 -10    4.35    1.12   0 0.98642-0.85714-0.15371-0.08084-0.01938-0.52737
   2  -4 -10   11.93    1.79   0 0.98790-0.85603-0.14624-0.04196-0.01094-0.53351
   2  -3 -10  119.03    2.43   0 0.98788-0.85625-0.14633 0.00515-0.01105-0.53440
   2  -2 -10    1.19    1.72   0 0.98790-0.85612-0.14624 0.05306-0.01094-0.53148
   2  -1 -10   24.55    1.47   0 0.98563-0.85563-0.15744 0.11020-0.02360-0.52262
   2  -1   9  111.23    2.07   0 0.98500-0.83280-0.16030 0.11541-0.02685 0.52267
   2   0   9    0.85    1.67   0 0.98790-0.83592-0.14624 0.14709-0.01094 0.50965
   2   2  -9    3.51    1.77   0 0.98689-0.85414-0.15139 0.24723-0.01676-0.47289
   2   2   8    3.73    1.21   0 0.98461-0.83251-0.16202 0.25685-0.02879 0.47064
   2   3   8    5.96    1.59   0 0.98885-0.83704-0.14105 0.28485-0.00510 0.44640
   2   4   7    5.04    1.21   0 0.98606-0.83488-0.15543 0.34557-0.02133 0.40678
   2   5   6  153.32    2.06   0 0.98487-0.83419-0.16088 0.39898-0.02750 0.35791
   2   6   5  245.51    2.49   0 0.98550-0.83580-0.15801 0.44320-0.02425 0.29968
   2   7   4   96.70    2.09   0 0.98790-0.83915-0.14625 0.47847-0.01096 0.23178
   2   8  -2  368.70    4.49   0 0.98846-0.84612-0.14320 0.52176-0.00753-0.10080
   2   8  -1  114.52    2.63   0 0.98649-0.84328-0.15338 0.53248-0.01901-0.03447
   2   8   0  507.92    4.08   0 0.98606-0.84141-0.15543 0.53415-0.02133 0.02251
   2   8   1  125.52    2.51   0 0.98784-0.84330-0.14658 0.52583-0.01133 0.06769
   3 -16  -4    2.08    1.56   0 0.98719-0.78192-0.14990-0.60008-0.01508-0.19996
   3 -16  -3    0.87    1.75   0 0.98855-0.78310-0.14273-0.61098-0.00699-0.15336
   3 -16   3    4.87    1.89   0 0.98790-0.77440-0.14624-0.60510-0.01094 0.18232
   3 -15  -6   -0.66    1.29   0 0.98642-0.78461-0.15371-0.55319-0.01938-0.30475
   3 -15   5    1.15    1.90   0 0.98812-0.77282-0.14508-0.56098-0.00965 0.28863
   3 -14  -7    8.12    1.67   0 0.98790-0.78613-0.14626-0.51265-0.01097-0.36800
   3 -13  -8    3.96    1.72   0 0.98804-0.78743-0.14548-0.46629-0.01009-0.42454
   3 -12  -9    2.15    1.68   0 0.98776-0.78690-0.14695-0.41581-0.01176-0.47628
   3 -11 -10    1.48    1.30   0 0.98550-0.78705-0.15801-0.35835-0.02425-0.52161
   3 -10 -10    7.29    1.64   0 0.98859-0.79007-0.14251-0.32795-0.00674-0.53712
   3  -9 -11    0.48    1.17   0 0.98538-0.78826-0.15858-0.26585-0.02490-0.57345
   3  -8 -11    7.97    1.70   0 0.98787-0.78920-0.14641-0.22970-0.01114-0.58776
   3  -6  11   -0.93    1.65   0 0.98838-0.76378-0.14364-0.13699-0.00802 0.61549
   3  -5 -12    2.77    1.36   0 0.98519-0.78743-0.15944-0.07344-0.02587-0.62897
   3  -5  11   -0.57    1.59   0 0.98715-0.76321-0.15012-0.08412-0.01533 0.62500
   3  -4 -12   13.23    1.39   0 0.98575-0.78843-0.15686-0.03184-0.02295-0.63099
   3  -3 -12   12.26    1.40   0 0.98594-0.78756-0.15600 0.01406-0.02198-0.63243
   3  -2 -12    1.11    1.35   0 0.98538-0.78678-0.15858 0.06726-0.02490-0.62953
   3  -2  11    1.34    1.25   0 0.98594-0.76023-0.15600 0.06094-0.02198 0.63018
   3  -1  11   32.26    1.96   0 0.98790-0.76470-0.14624 0.10240-0.01094 0.61919
   3   0  11    9.94    1.83   0 0.98885-0.76394-0.14105 0.14364-0.00510 0.61180
   3   2 -11   10.35    1.82   0 0.98779-0.78425-0.14682 0.24156-0.01160-0.58610
   3   2  10    0.97    1.20   0 0.98494-0.75929-0.16059 0.25444-0.02717 0.58089
   3   3  10   51.50    1.93   0 0.98842-0.76342-0.14345 0.28766-0.00781 0.55982
   3   4 -10   -0.33    1.68   0 0.98785-0.78627-0.14652 0.33475-0.01127-0.53305
   3   4   9   29.36    1.37   0 0.98442-0.75981-0.16288 0.35392-0.02977 0.52631
   3   5   9   -0.03    1.49   0 0.98838-0.76354-0.14364 0.37892-0.00802 0.50342
   3   6   8  344.50    3.07   0 0.98784-0.76658-0.14654 0.43309-0.01128 0.45373
   3   7   7    4.85    1.18   0 0.98654-0.76345-0.15313 0.48391-0.01873 0.40647
   3   8   6   13.37    1.61   0 0.98787-0.76709-0.14640 0.52659-0.01113 0.34371
   3   9   4  145.48    2.08   0 0.98569-0.76537-0.15715 0.58370-0.02328 0.24524
   3  10  -3   13.02    2.09   0 0.99002-0.77751-0.13415 0.60695 0.00266-0.16407
   3  10  -2    3.29    1.73   0 0.98682-0.77341-0.15174 0.62550-0.01715-0.08804
   3  10  -1    0.38    1.20   0 0.98494-0.77006-0.16059 0.63361-0.02717-0.02194
   3  10   0   55.79    1.66   0 0.98506-0.76913-0.16002 0.63313-0.02652 0.02925
   3  10   1    5.77    1.21   0 0.98618-0.76901-0.15486 0.62777-0.02068 0.07880
   3  10   2  257.76    2.98   0 0.98811-0.76986-0.14512 0.61864-0.00969 0.12214
   4 -10 -12   -1.14    1.28   0 0.98665-0.71979-0.15256-0.31862-0.01809-0.63375
   4  -8 -13   -0.62    1.36   0 0.98455-0.71850-0.16231-0.21458-0.02912-0.67782
   4  -8  12   -0.50    2.03   0 0.98973-0.69427-0.13595-0.23828 0.00064 0.66578
   4  -7 -13   -0.60    1.31   0 0.98636-0.72009-0.15400-0.17573-0.01971-0.68727
   4  -6 -13    0.84    1.83   0 0.98801-0.71991-0.14566-0.13537-0.01030-0.69650
   4  -5 -13    2.87    1.64   0 0.98868-0.72086-0.14203-0.09205-0.00621-0.70249
   4  -1 -13   -0.48    1.68   0 0.98833-0.72109-0.14393 0.09664-0.00835-0.70057
   4   0 -13   -0.62    1.77   0 0.98763-0.71898-0.14767 0.14738-0.01257-0.69340
   4   1  12    0.06    1.62   0 0.98790-0.68960-0.14624 0.19568-0.01094 0.68139
   4   2  12    1.34    1.61   0 0.98821-0.68870-0.14458 0.23778-0.00907 0.66884
   4   3 -12    9.12    1.85   0 0.98901-0.71860-0.14018 0.28159-0.00412-0.64916
   4   4  11    1.59    1.74   0 0.98762-0.68963-0.14771 0.33746-0.01261 0.62386
   4   5 -11    3.53    1.95   0 0.99107-0.71688-0.12738 0.36315 0.01026-0.60779
   4   6  10   29.64    1.77   0 0.98817-0.69104-0.14480 0.43094-0.00932 0.56255
   4   7   9   28.15    1.37   0 0.98636-0.69010-0.15400 0.48606-0.01971 0.51781
   4   8   8   44.44    1.48   0 0.98575-0.69017-0.15686 0.53676-0.02295 0.46615
   4   9   7   74.29    1.60   0 0.98624-0.69153-0.15457 0.58136-0.02036 0.40852
   4  10   6   98.89    2.12   0 0.98801-0.69430-0.14567 0.61991-0.01031 0.34395
   4  11  -5   25.05    2.31   0 0.99069-0.70985-0.12987 0.65022 0.00747-0.27613
   4  11   4   45.50    1.93   0 0.98789-0.69725-0.14630 0.66781-0.01102 0.23522
   4  12  -1   91.97    2.27   0 0.98922-0.70323-0.13893 0.70626-0.00271-0.04746
   4  12   0  128.41    2.55   0 0.98888-0.70144-0.14089 0.70836-0.00492 0.00937
   5   0 -14   -1.57    1.69   0 0.98870-0.65081-0.14192 0.14258-0.00607-0.75863
   5   1 -14   12.95    2.00   0 0.98790-0.64832-0.14624 0.19232-0.01094-0.74929
   5   1  13   11.88    1.42   0 0.98513-0.61514-0.15973 0.20929-0.02620 0.74596
   5   2  13    1.37    1.82   0 0.98778-0.61696-0.14689 0.24286-0.01168 0.73419
   5   4 -13    2.28    2.00   0 0.98821-0.64664-0.14459 0.33544-0.00909-0.69689
   5   4  12    1.48    1.33   0 0.98506-0.61421-0.16002 0.34855-0.02652 0.69306
   5   5  12    2.96    1.68   0 0.98859-0.61790-0.14249 0.38021-0.00672 0.67297
   5   6 -12   -0.33    1.75   0 0.98779-0.64510-0.14681 0.43424-0.01159-0.63981
   5   6  11    1.25    1.17   0 0.98538-0.61527-0.15858 0.44186-0.02490 0.63721
   5   8  10    0.35    1.65   0 0.98795-0.61887-0.14595 0.52546-0.01062 0.56734
   5   9   9   15.29    1.79   0 0.98789-0.62272-0.14628 0.57564-0.01099 0.51267
   5  10   8   -0.28    1.73   0 0.98790-0.62104-0.14624 0.62181-0.01094 0.45912
   5  11   7   10.92    1.76   0 0.98870-0.62271-0.14192 0.66334-0.00607 0.39586
   5  12  -6    0.90    2.06   0 0.99131-0.63973-0.12568 0.69445 0.01216-0.33531
   5  12   5    2.38    1.76   0 0.98790-0.62471-0.14624 0.71489-0.01094 0.29248
   5  13  -3   15.99    1.85   0 0.98846-0.63373-0.14323 0.75776-0.00756-0.15057
   5  13  -2    0.72    1.53   0 0.98606-0.62930-0.15543 0.77083-0.02133-0.07928
   5  13  -1    0.32    1.28   0 0.98506-0.62828-0.16002 0.77440-0.02652-0.02139
   5  13   0   -0.38    1.25   0 0.98519-0.62726-0.15944 0.77389-0.02587 0.03285
   5  13   1   21.17    1.39   0 0.98612-0.62646-0.15514 0.77005-0.02101 0.08200
   5  13   2   49.42    2.06   0 0.98787-0.62776-0.14637 0.76201-0.01110 0.12738
   6   8  11    1.03    1.36   0 0.98624-0.54436-0.15457 0.53229-0.02036 0.63400
   6   9  10   13.88    1.46   0 0.98500-0.54503-0.16030 0.58704-0.02685 0.58374
   6  10   9   18.63    1.57   0 0.98461-0.54524-0.16202 0.63531-0.02879 0.53147
   6  11   8    1.78    1.32   0 0.98538-0.54632-0.15858 0.67873-0.02490 0.47462
   6  12   7   -1.49    1.62   0 0.98746-0.55020-0.14854 0.71919-0.01354 0.40705
   6  13   5    0.38    1.38   0 0.98630-0.55140-0.15428 0.76938-0.02003 0.30302
   6  14  -4    0.49    1.92   0 0.98909-0.56357-0.13973 0.79994-0.00361-0.20550
   6  14  -3    2.96    1.90   0 0.98695-0.56027-0.15109 0.81547-0.01642-0.13831
   6  14   1   45.59    1.75   0 0.98494-0.55425-0.16059 0.82292-0.02717 0.09023
   6  14   2    2.28    1.70   0 0.98686-0.55398-0.15157 0.81589-0.01696 0.13739
   6  14   3   40.23    2.09   0 0.98843-0.55570-0.14339 0.80576-0.00773 0.18001
   0  -5  -1   -0.05    1.79   0 0.99148-0.99333-0.12329-0.11090 0.01363-0.06822
   0  -5   0    0.16    1.87   0 0.99148-0.99416-0.12329-0.11475 0.01363-0.01412
   0  -5   1    0.60    2.05   0 0.99179-0.99264-0.12098-0.11403 0.01623 0.03806
   0  -4  -2  246.61    3.22   0 0.99039-0.99391-0.13081-0.05673 0.00517-0.11673
   0  -4   2  348.02    7.89   0 0.99348-0.99283-0.10617-0.08057 0.03282 0.07568
   0  -3  -2  128.15    3.31   0 0.99148-0.99431-0.12329-0.01651 0.01363-0.12453
   0  -2  -2  496.22    5.55   0 0.99147-0.99365-0.12337 0.03066 0.01353-0.12451
   0  -1   2 1042.10   12.13   0 0.99137-0.98982-0.12407 0.07872 0.01275 0.09535
   1 -11  -2   79.17    1.79   0 0.98897-0.92423-0.13946-0.37812-0.00459-0.10455
   1 -11  -1  199.79    2.43   0 0.99021-0.92434-0.13196-0.38579 0.00387-0.05808
   1 -11   0  175.49    2.74   0 0.99121-0.92260-0.12527-0.39207 0.01141-0.00982
   1 -11   1    2.15    1.58   0 0.99101-0.92165-0.12661-0.38932 0.00990 0.04549
   1 -10  -3   -0.89    1.66   0 0.99140-0.92672-0.12387-0.34778 0.01298-0.17435
   1 -10   3   13.95    2.14   0 0.99314-0.92260-0.10953-0.35994 0.02906 0.13705
   1  -9  -5   94.94    1.79   0 0.98907-0.92682-0.13888-0.28422-0.00394-0.26989
   1  -9  -4   65.57    1.89   0 0.99216-0.92855-0.11809-0.30522 0.01947-0.23759
   1  -8  -5   93.90    2.02   0 0.99193-0.92888-0.11987-0.25631 0.01747-0.29066
   1  -7  -6    5.50    1.10   0 0.99052-0.92829-0.12994-0.19954 0.00615-0.33502
   1  -5  -7   47.47    1.46   0 0.98917-0.92738-0.13830-0.09607-0.00329-0.38041
   1  -5   7   58.51    2.52   0 0.99155-0.91580-0.12277-0.11055 0.01421 0.37081
   1  -4  -7    7.59    1.07   0 0.99012-0.92784-0.13254-0.05471 0.00322-0.38701
   1  -3  -7   93.04    1.84   0 0.99056-0.92727-0.12965-0.01110 0.00647-0.39150
   1  -2  -7   55.47    1.59   0 0.99039-0.92702-0.13081 0.03764 0.00517-0.38954
   1  -1  -7   11.78    1.28   0 0.98937-0.92603-0.13715 0.09132-0.00198-0.38166
   1  -1   7   28.56    1.56   0 0.98998-0.91214-0.13340 0.08773 0.00224 0.38199
   1   0   7 1940.63    7.67   0 0.99185-0.91402-0.12049 0.12310 0.01678 0.36747
   1   1  -6   -0.56    1.91   0 0.99251-0.92729-0.11518 0.16273 0.02273-0.35101
   1   2   6  152.92    2.59   0 0.99143-0.91507-0.12366 0.22077 0.01321 0.31629
   1   3  -5   30.22    2.45   0 0.99120-0.92351-0.12529 0.26778 0.01138-0.28523
   1   3   5   -0.24    1.24   0 0.98932-0.91211-0.13744 0.27844-0.00231 0.27800
   1   4   4    0.51    1.23   0 0.98956-0.91283-0.13600 0.32475-0.00068 0.22215
   1   5   2   67.84    1.92   0 0.98877-0.91360-0.14061 0.37799-0.00589 0.11591
   1   5   3   37.01    2.02   0 0.99171-0.91575-0.12158 0.35951 0.01556 0.14908
   2 -14  -1   18.61    1.38   0 0.98989-0.85375-0.13398-0.52523 0.00159-0.05366
   2 -14   0   23.96    1.71   0 0.99042-0.85276-0.13059-0.52805 0.00541-0.00270
   2 -14   1  104.07    2.20   0 0.98984-0.85170-0.13427-0.52490 0.00127 0.05638
   2 -13  -4   44.72    1.59   0 0.99007-0.85690-0.13283-0.47942 0.00290-0.21982
   2 -13  -3    7.96    1.82   0 0.99200-0.85786-0.11938-0.49303 0.01803-0.17981
   2 -13   4    5.47    1.80   0 0.99071-0.84800-0.12871-0.48285 0.00753 0.21513
   2 -12  -5    7.88    1.65   0 0.99156-0.85847-0.12271-0.44190 0.01428-0.28615
   2 -11  -6   66.26    2.01   0 0.99186-0.86010-0.12044-0.39754 0.01683-0.34297
   2 -10  -7   66.71    1.93   0 0.99151-0.86004-0.12303-0.34764 0.01392-0.39493
   2  -9  -8    0.37    1.12   0 0.99012-0.86011-0.13254-0.29250 0.00322-0.43801
   2  -7  -9    4.05    1.16   0 0.98961-0.85985-0.13571-0.19292-0.00036-0.49102
   2  -6  -9   30.56    1.77   0 0.99147-0.85921-0.12338-0.15884 0.01353-0.50415
   2  -5  -9    1.27    1.52   0 0.99230-0.86088-0.11692-0.11811 0.02078-0.51223
   2   0  -9    1.78    1.72   0 0.99186-0.85990-0.12040 0.12179 0.01687-0.51003
   2   1  -9   96.84    2.30   0 0.99068-0.85643-0.12889 0.17679 0.00733-0.49858
   2   1   9  114.90    2.04   0 0.98956-0.83774-0.13600 0.18490-0.00068 0.49613
   2   2   9   66.94    2.06   0 0.99190-0.84033-0.12015 0.21730 0.01716 0.47843
   2   3  -8    3.40    1.77   0 0.99220-0.85726-0.11779 0.25982 0.01981-0.45672
   2   4   8   80.04    2.07   0 0.99186-0.84041-0.12040 0.31189 0.01687 0.42348
   2   5   7  101.21    1.75   0 0.99052-0.83986-0.12994 0.36720 0.00615 0.37878
   2   6   6    6.46    1.21   0 0.99030-0.83951-0.13138 0.41608 0.00452 0.32688
   2   7   5  109.81    2.12   0 0.99147-0.84239-0.12334 0.45598 0.01357 0.26213
   2   8  -3    1.01    2.03   0 0.99321-0.85157-0.10889 0.48769 0.02978-0.19215
   2   8   2    2.08    1.18   0 0.98912-0.84212-0.13859 0.51712-0.00361 0.11619
   2   8   3  316.62    3.07   0 0.99147-0.84434-0.12337 0.50296 0.01354 0.15234
   3 -16  -2    0.68    1.25   0 0.98975-0.78419-0.13484-0.61894 0.00062-0.10774
   3 -16  -1   17.57    1.89   0 0.99107-0.78252-0.12624-0.62645 0.01031-0.05920
   3 -16   0    5.78    1.79   0 0.99147-0.78237-0.12334-0.62819 0.01357-0.00762
   3 -16   1   49.19    2.26   0 0.99116-0.78079-0.12558-0.62689 0.01105 0.04959
   3 -16   2    1.44    1.34   0 0.98965-0.77966-0.13542-0.61853-0.00003 0.11260
   3 -15  -5   13.04    1.41   0 0.98927-0.78706-0.13773-0.56809-0.00263-0.26768
   3 -15  -4    7.62    1.85   0 0.99156-0.78780-0.12271-0.58279 0.01428-0.22937
   3 -15   4    4.53    1.92   0 0.99276-0.78060-0.11304-0.59273 0.02514 0.19907
   3 -14  -6   33.97    1.89   0 0.99130-0.78627-0.12461-0.53359 0.01215-0.33541
   3 -14   6   16.19    2.47   0 0.99250-0.77772-0.11528-0.54248 0.02262 0.31197
   3 -13  -7    5.23    1.63   0 0.99148-0.78966-0.12329-0.48826 0.01363-0.39337
   3 -12  -8   17.75    1.72   0 0.99146-0.78935-0.12341-0.44132 0.01350-0.44711
   3 -11  -9   13.91    1.30   0 0.99025-0.79095-0.13167-0.38576 0.00420-0.49408
   3  -9 -10   -1.35    1.55   0 0.99114-0.79139-0.12575-0.29784 0.01086-0.55156
   3  -7 -11    0.42    1.21   0 0.98941-0.79110-0.13686-0.19378-0.00166-0.59662
   3  -7  11   16.43    2.03   0 0.99190-0.77025-0.12011-0.20801 0.01721 0.59022
   3  -6 -11    1.00    1.52   0 0.99079-0.79131-0.12813-0.15261 0.00818-0.60808
   3  -5 -11    1.02    1.76   0 0.99175-0.79147-0.12126-0.11345 0.01590-0.61621
   3  -1 -11   39.72    1.95   0 0.99239-0.79130-0.11618 0.06896 0.02161-0.62143
   3   0 -11    1.34    1.78   0 0.99160-0.78954-0.12242 0.12360 0.01460-0.61447
   3   1 -11   37.73    1.63   0 0.98975-0.78810-0.13484 0.18232 0.00062-0.60065
   3   1  11   37.51    1.90   0 0.99070-0.76700-0.12873 0.17855 0.00751 0.60046
   3   2  11    1.56    1.77   0 0.99220-0.76724-0.11779 0.21397 0.01981 0.58844
   3   3 -10    0.46    1.52   0 0.99284-0.78886-0.11228 0.25503 0.02598-0.57107
   3   4  10   15.26    1.64   0 0.99148-0.76875-0.12329 0.31551 0.01363 0.53900
   3   5  -9    4.94    2.01   0 0.99373-0.78735-0.10354 0.33943 0.03576-0.52539
   3   6   9   37.65    1.74   0 0.99209-0.76771-0.11866 0.40468 0.01883 0.47826
   3   7   8    4.45    1.65   0 0.99143-0.76810-0.12367 0.45581 0.01320 0.43008
   3   8   7  144.78    2.28   0 0.99152-0.76901-0.12303 0.50318 0.01393 0.37316
   3   9   5   16.52    1.27   0 0.98927-0.76754-0.13773 0.56389-0.00263 0.28063
   3  10   3   10.35    1.30   0 0.98998-0.77002-0.13340 0.60665 0.00224 0.16622
   3  10   4   54.14    1.95   0 0.99216-0.77196-0.11808 0.59213 0.01948 0.20282
   4 -15  -7   10.72    1.99   0 0.99179-0.71975-0.12098-0.58551 0.01623-0.39421
   4 -14  -8    1.92    1.59   0 0.99171-0.72124-0.12158-0.54045 0.01555-0.45292
   4 -13  -9    0.32    1.84   0 0.99190-0.72116-0.12011-0.49159 0.01721-0.50657
   4 -12 -10    4.27    1.95   0 0.99148-0.71976-0.12329-0.43950 0.01363-0.55483
   4 -11 -11   -0.04    1.34   0 0.98932-0.72121-0.13744-0.38153-0.00231-0.59485
   4 -11  11    3.60    2.90   0 0.99506-0.70454-0.08464-0.43111 0.05681 0.55409
   4 -10 -11    1.70    1.73   0 0.99167-0.72192-0.12184-0.34824 0.01525-0.61426
   4  -9 -12    0.09    1.24   0 0.98892-0.72122-0.13974-0.28487-0.00491-0.64701
   4  -8 -12    0.82    1.53   0 0.99106-0.72165-0.12630-0.24759 0.01025-0.66172
   4  -7 -12    1.77    1.52   0 0.99198-0.72271-0.11949-0.20953 0.01790-0.67356
   4  -5  13    0.64    1.73   0 0.99265-0.69679-0.11402-0.11954 0.02403 0.69496
   4  -4 -13   -0.01    1.41   0 0.98927-0.72117-0.13773-0.05110-0.00263-0.70450
   4  -4  13   -1.09    1.91   0 0.99164-0.69527-0.12213-0.06294 0.01493 0.70336
   4  -3 -13    0.71    1.35   0 0.98946-0.72015-0.13657-0.00213-0.00133-0.70705
   4  -3  13    8.03    1.79   0 0.99154-0.69609-0.12282-0.01603 0.01416 0.70483
   4  -2 -13   16.06    1.46   0 0.98927-0.72052-0.13773 0.04422-0.00263-0.70491
   4  -2  13   -0.06    1.74   0 0.99148-0.69472-0.12329 0.03221 0.01363 0.70533
   4  -1  13   21.02    1.86   0 0.99194-0.69558-0.11982 0.07548 0.01753 0.70094
   4   2 -12    3.77    1.86   0 0.99201-0.71997-0.11929 0.21435 0.01812-0.67159
   4   3  12    7.88    1.73   0 0.99148-0.69622-0.12329 0.26803 0.01363 0.65101
   4   5  11   -1.00    1.18   0 0.99034-0.69305-0.13109 0.36825 0.00485 0.60402
   4   7  10    2.99    1.65   0 0.99160-0.69531-0.12242 0.45496 0.01460 0.53956
   4   8   9    3.33    1.51   0 0.99065-0.69443-0.12907 0.50713 0.00712 0.49284
   4   9   8    3.53    1.52   0 0.99087-0.69522-0.12757 0.55494 0.00881 0.43814
   4  10   7    4.20    1.66   0 0.99152-0.69746-0.12300 0.59725 0.01395 0.37582
   4  11   5  184.25    2.23   0 0.99030-0.69712-0.13138 0.65200 0.00452 0.27459
   4  12  -3    3.35    1.91   0 0.99286-0.70843-0.11210 0.67951 0.02618-0.18509
   4  12  -2    6.58    1.76   0 0.99053-0.70478-0.12986 0.69779 0.00623-0.11026
   4  12   1   -0.07    1.29   0 0.98927-0.70089-0.13773 0.70441-0.00263 0.06248
   4  12   2   66.03    1.82   0 0.99034-0.70007-0.13109 0.69855 0.00485 0.11007
   4  12   3    1.04    1.77   0 0.99179-0.70051-0.12098 0.68900 0.01623 0.15401
   5  -3 -14    2.32    1.95   0 0.99148-0.65007-0.12329-0.01577 0.01363-0.77172
   5  -2 -14    1.99    1.99   0 0.99136-0.64989-0.12414 0.03220 0.01268-0.77105
   5  -1 -14    7.44    1.58   0 0.99030-0.65035-0.13138 0.08649 0.00452-0.76606
   5   0  14    0.15    1.86   0 0.99152-0.62187-0.12300 0.12668 0.01395 0.76046
   5   3 -13    1.55    1.94   0 0.99157-0.64932-0.12263 0.26747 0.01437-0.72204
   5   3  13    1.44    1.31   0 0.98961-0.61907-0.13571 0.27788-0.00036 0.72138
   5   4  13   22.25    2.01   0 0.99178-0.62155-0.12104 0.31288 0.01616 0.70474
   5   6  12   21.16    1.85   0 0.99146-0.62349-0.12340 0.40957 0.01351 0.65174
   5   7  11   -0.06    1.22   0 0.98922-0.62034-0.13802 0.46993-0.00296 0.61327
   5   9  10    6.96    1.84   0 0.99161-0.62308-0.12232 0.54920 0.01472 0.54113
   5  10   9    2.46    1.79   0 0.99148-0.62342-0.12331 0.59723 0.01360 0.48801
   5  11   8   29.62    1.80   0 0.99198-0.62518-0.11953 0.64112 0.01786 0.42731
   5  12   6   15.24    1.73   0 0.99075-0.62573-0.12841 0.69754 0.00787 0.32886
   5  13  -4   42.98    2.32   0 0.99195-0.63751-0.11973 0.73451 0.01763-0.22956
   5  13   3   15.16    1.46   0 0.98927-0.62700-0.13773 0.75220-0.00263 0.17427
   5  13   4   14.66    1.89   0 0.99147-0.62961-0.12333 0.73958 0.01358 0.21236
   6   9 -11    0.06    2.13   0 0.99288-0.57475-0.11199 0.53932 0.02631-0.62230
   6  10  10    0.15    1.40   0 0.98961-0.54985-0.13571 0.60943-0.00036 0.55699
   6  11   9    1.35    1.43   0 0.98970-0.54966-0.13513 0.65529 0.00029 0.50320
   6  12   8   16.73    1.69   0 0.99077-0.55200-0.12830 0.69803 0.00800 0.44010
   6  13   6    6.79    1.43   0 0.98937-0.55217-0.13715 0.75270-0.00198 0.34031
   6  13   7    3.79    1.65   0 0.99187-0.55405-0.12032 0.73418 0.01696 0.37503
   6  14   4   17.04    1.59   0 0.99021-0.55578-0.13196 0.79375 0.00387 0.22423
   6  14   5   23.68    1.89   0 0.99223-0.55705-0.11750 0.78061 0.02013 0.26239
   0  -4  -1    5.07    1.55   0 0.99292-0.99566-0.11141-0.07538 0.02644-0.08202
   0  -4   0  126.24    3.43   0 0.99443-0.99602-0.09489-0.09191 0.04493-0.04648
   0  -3  -1 1471.64    8.99   0 0.99418-0.99626-0.09809-0.04171 0.04135-0.09784
   0  -1  -1 1352.48   11.64   0 0.99399-0.99511-0.10044 0.05503 0.03873-0.09535
   0   0   1    0.09    1.90   0 0.99310-0.99210-0.10967 0.10967 0.02839 0.02723
   1 -10  -2  144.21    2.12   0 0.99298-0.92814-0.11083-0.35953 0.02709-0.13621
   1 -10  -1    5.61    1.67   0 0.99411-0.92757-0.09899-0.37220 0.04035-0.09514
   1 -10   2  129.62    2.85   0 0.99454-0.92541-0.09341-0.37676 0.04658 0.06373
   1  -9  -3   44.25    1.78   0 0.99414-0.92950-0.09863-0.32445 0.04075-0.20492
   1  -8  -4   36.93    1.68   0 0.99432-0.93042-0.09631-0.27965 0.04335-0.26220
   1  -7  -5    6.09    1.52   0 0.99397-0.92997-0.10072-0.22740 0.03841-0.31159
   1  -6  -6    3.05    1.18   0 0.99231-0.93006-0.11663-0.16561 0.02058-0.34879
   1  -6   7  174.70    4.52   0 0.99527-0.91979-0.07988-0.20092 0.06165 0.32345
   1  -5  -6   74.48    1.92   0 0.99390-0.92880-0.10150-0.13307 0.03755-0.36581
   1  -4  -6  146.49    2.36   0 0.99436-0.93093-0.09582-0.09161 0.04389-0.37266
   1   0  -6   -0.09    1.84   0 0.99432-0.92948-0.09631 0.09647 0.04335-0.37143
   1   1   7   30.84    1.94   0 0.99361-0.91601-0.10461 0.15383 0.03406 0.35059
   1   3   6  247.44    2.86   0 0.99390-0.91718-0.10146 0.24545 0.03759 0.29161
   1   4   5   33.62    1.45   0 0.99323-0.91550-0.10851 0.29920 0.02969 0.24451
   1   5   4    0.51    1.66   0 0.99400-0.91740-0.10038 0.33757 0.03880 0.18289
   1   6   0    6.24    2.05   0 0.99416-0.92061-0.09836 0.38312 0.04106-0.04058
   1   6   1   10.46    2.07   0 0.99402-0.91947-0.10010 0.38516 0.03911 0.01601
   1   6   2 1088.72    5.74   0 0.99447-0.91905-0.09436 0.37908 0.04552 0.06424
   2 -13  -2    1.22    1.66   0 0.99339-0.85790-0.10689-0.50498 0.03150-0.13975
   2 -13  -1   -0.00    1.72   0 0.99421-0.85762-0.09776-0.51448 0.04172-0.09461
   2 -13   2  265.44    3.45   0 0.99451-0.85509-0.09384-0.51799 0.04611 0.06615
   2 -13   3    0.81    1.71   0 0.99356-0.85266-0.10516-0.50683 0.03345 0.13273
   2 -12  -4   13.63    1.53   0 0.99381-0.85837-0.10247-0.46137 0.03646-0.25310
   2 -12   5   14.84    1.87   0 0.99428-0.85113-0.09691-0.46730 0.04268 0.23436
   2 -11  -5   14.37    1.65   0 0.99414-0.86113-0.09864-0.41933 0.04074-0.31273
   2 -10  -6    4.84    1.60   0 0.99414-0.86172-0.09863-0.37250 0.04075-0.36752
   2  -9  -7    4.29    1.43   0 0.99395-0.86064-0.10089-0.31997 0.03822-0.41739
   2  -8  -8    8.95    1.14   0 0.99217-0.86223-0.11779-0.25889 0.01927-0.45531
   2  -7  -8    0.53    1.55   0 0.99400-0.86131-0.10038-0.22781 0.03880-0.47347
   2  -5  10    3.58    1.70   0 0.99469-0.84470-0.09106-0.14303 0.04920 0.50137
   2  -4  -9    8.06    1.27   0 0.99292-0.86184-0.11141-0.07706 0.02644-0.51834
   2  -4  10   16.17    1.79   0 0.99383-0.84426-0.10226-0.08393 0.03669 0.51426
   2  -3  -9   -0.12    1.21   0 0.99329-0.86275-0.10793-0.03514 0.03034-0.52091
   2  -3  10   31.99    1.49   0 0.99301-0.84187-0.11054-0.02857 0.02741 0.52331
   2  -2  -9    2.37    1.55   0 0.99365-0.86121-0.10418 0.01098 0.03454-0.52399
   2  -2  10   38.96    1.49   0 0.99295-0.84143-0.11112 0.01919 0.02676 0.52393
   2  -1  -9   92.77    1.86   0 0.99304-0.86106-0.11025 0.06372 0.02774-0.51967
   2  -1  10    0.25    1.51   0 0.99329-0.84085-0.10793 0.06154 0.03034 0.52123
   2   0  10   70.91    2.24   0 0.99400-0.84240-0.10038 0.10285 0.03880 0.51195
   2   3   9  120.50    2.29   0 0.99389-0.84355-0.10160 0.24632 0.03743 0.45838
   2   5   8  204.84    2.59   0 0.99414-0.84239-0.09867 0.33692 0.04071 0.40007
   2   6   7   26.56    1.68   0 0.99395-0.84441-0.10091 0.38709 0.03820 0.34831
   2   7   6  130.51    2.24   0 0.99399-0.84414-0.10038 0.43298 0.03879 0.29219
   2   8   4  449.04    3.20   0 0.99317-0.84402-0.10909 0.48851 0.02904 0.19198
   2   9   0    6.10    1.78   0 0.99439-0.84900-0.09543 0.52159 0.04432-0.04237
   2   9   1  166.42    2.65   0 0.99423-0.84763-0.09753 0.52363 0.04198 0.01459
   3 -15  -3   33.15    1.62   0 0.99304-0.78833-0.11025-0.59608 0.02774-0.18831
   3 -15  -2   15.09    1.78   0 0.99409-0.78832-0.09922-0.60693 0.04009-0.14577
   3 -15   3   15.73    1.86   0 0.99450-0.78290-0.09398-0.61217 0.04595 0.12316
   3 -14  -5    7.51    1.33   0 0.99304-0.79010-0.11025-0.54879 0.02774-0.29944
   3 -13  -6   -0.10    1.62   0 0.99400-0.79039-0.10038-0.50958 0.03880-0.36359
   3 -13   7    9.10    2.59   0 0.99525-0.77909-0.08053-0.53017 0.06093 0.32813
   3 -12  -7    1.74    1.64   0 0.99398-0.79188-0.10057-0.46369 0.03859-0.41912
   3 -12   8   14.91    3.46   0 0.99474-0.77775-0.03379-0.52950 0.11252 0.33218
   3 -11  -8    5.02    1.58   0 0.99381-0.79212-0.10247-0.41256 0.03646-0.47011
   3 -10  -9   -0.65    1.22   0 0.99259-0.79308-0.11431-0.35805 0.02318-0.51196
   3 -10  10    1.04    2.98   0 0.99546-0.77673-0.05017-0.41981 0.09453 0.45943
   3  -9  -9   17.79    1.71   0 0.99421-0.79426-0.09776-0.32590 0.04172-0.53145
   3  -8 -10    4.79    1.27   0 0.99248-0.79299-0.11518-0.26114 0.02220-0.56810
   3  -8  11   41.11    2.63   0 0.99517-0.77427-0.08230-0.29281 0.05896 0.54903
   3  -7 -10    4.60    1.62   0 0.99400-0.79278-0.10038-0.22830 0.03880-0.58237
   3  -4 -11   16.66    1.40   0 0.99234-0.79305-0.11634-0.07180 0.02090-0.62038
   3  -4  12   -0.44    1.72   0 0.99425-0.76962-0.09732-0.08737 0.04221 0.61862
   3  -3 -11    1.71    1.40   0 0.99269-0.79228-0.11344-0.02647 0.02416-0.62457
   3  -3  12   24.16    2.07   0 0.99409-0.77029-0.09926-0.03972 0.04005 0.62219
   3  -2 -11   14.26    1.41   0 0.99272-0.79262-0.11315 0.01943 0.02448-0.62393
   3  -2  12   34.72    2.00   0 0.99402-0.77007-0.10013 0.00806 0.03907 0.62328
   3  -1  12    1.11    1.68   0 0.99414-0.76903-0.09866 0.05370 0.04072 0.62199
   3   0  12    0.14    1.44   0 0.99427-0.76849-0.09703 0.10003 0.04254 0.61667
   3   3  11   17.57    1.82   0 0.99387-0.77036-0.10181 0.24671 0.03720 0.57127
   3   5  10   12.93    1.22   0 0.99332-0.76772-0.10764 0.34594 0.03067 0.52162
   3   7   9   70.12    1.96   0 0.99437-0.77008-0.09572 0.42859 0.04400 0.45333
   3   8   8   18.63    1.69   0 0.99418-0.77054-0.09818 0.47796 0.04126 0.40123
   3   9   6   88.06    1.73   0 0.99231-0.76957-0.11663 0.54354 0.02058 0.31200
   3   9   7    6.32    1.57   0 0.99445-0.77170-0.09456 0.52104 0.04530 0.34257
   3  10  -4  114.59    3.32   0 0.99463-0.78231-0.09208 0.56512 0.04806-0.26354
   3  10   5   17.37    1.68   0 0.99398-0.77346-0.10054 0.57497 0.03861 0.24040
   3  11  -1   36.83    1.92   0 0.99431-0.77865-0.09646 0.61669 0.04318-0.09427
   3  11   0   13.06    1.69   0 0.99390-0.77811-0.10146 0.62221 0.03759-0.03342
   3  11   1    5.39    1.77   0 0.99399-0.77728-0.10039 0.62263 0.03878 0.01999
   3  11   2    4.48    1.64   0 0.99406-0.77531-0.09965 0.61975 0.03961 0.07456
   4 -17  -1    1.19    1.88   0 0.99402-0.71630-0.10009-0.69884 0.03912-0.08945
   4 -17   0   22.18    2.06   0 0.99426-0.71599-0.09718-0.70290 0.04237-0.03585
   4 -17   1    7.52    1.93   0 0.99435-0.71466-0.09601-0.70390 0.04367 0.01720
   4 -16  -5   -2.05    1.42   0 0.99275-0.71981-0.11286-0.64077 0.02481-0.29308
   4 -16  -4   13.09    1.93   0 0.99420-0.72014-0.09790-0.65573 0.04157-0.25522
   4 -15  -6    7.83    1.90   0 0.99400-0.72063-0.10038-0.60496 0.03880-0.36178
   4 -14  -7    1.77    1.73   0 0.99435-0.72219-0.09601-0.56272 0.04367-0.42336
   4 -13  -8   -0.56    1.55   0 0.99420-0.72376-0.09791-0.51786 0.04156-0.47585
   4 -12  -9   -1.85    1.76   0 0.99402-0.72408-0.10009-0.46655 0.03912-0.52661
   4 -11 -10    1.26    1.33   0 0.99320-0.72351-0.10880-0.40809 0.02936-0.57437
   4  -9 -11    1.45    1.23   0 0.99332-0.72392-0.10764-0.31479 0.03067-0.63026
   4  -9  12    6.64    2.06   0 0.99401-0.70047-0.10026-0.32285 0.03893 0.62547
   4  -6 -12    1.58    1.30   0 0.99317-0.72377-0.10909-0.17181 0.02904-0.68323
   4  -6  13    5.58    1.94   0 0.99402-0.69880-0.10003-0.18115 0.03918 0.67991
   4  -5 -12   11.38    1.93   0 0.99398-0.72387-0.10054-0.13443 0.03862-0.69130
   4  -4 -12   -1.51    1.74   0 0.99420-0.72558-0.09791-0.09239 0.04156-0.69616
   4   0 -12    0.69    1.71   0 0.99432-0.72258-0.09631 0.09767 0.04335-0.69692
   4   0  13    1.92    1.25   0 0.99255-0.69447-0.11460 0.11630 0.02286 0.69619
   4   1 -12   19.83    2.03   0 0.99393-0.72017-0.10108 0.14902 0.03801-0.68969
   4   1  13   24.91    1.76   0 0.99344-0.69644-0.10643 0.15622 0.03203 0.68623
   4   2  13    1.53    1.81   0 0.99425-0.69601-0.09729 0.19437 0.04225 0.67680
   4   4 -11    6.16    1.75   0 0.99441-0.72068-0.09514 0.28399 0.04465-0.64321
   4   4  12   -1.23    1.23   0 0.99292-0.69504-0.11141 0.30291 0.02644 0.63683
   4   5  12    9.34    1.61   0 0.99441-0.69709-0.09514 0.33373 0.04465 0.61904
   4   6 -10    0.18    2.06   0 0.99400-0.71953-0.10038 0.38754 0.03880-0.58578
   4   6  11   -0.39    1.16   0 0.99288-0.69555-0.11170 0.39736 0.02611 0.58246
   4   8  10   10.69    1.73   0 0.99404-0.69766-0.09980 0.47972 0.03945 0.51480
   4   9   9   16.18    1.75   0 0.99389-0.69930-0.10155 0.52908 0.03749 0.46236
   4  10   8    5.73    1.64   0 0.99401-0.69892-0.10025 0.57472 0.03894 0.40615
   4  11   6    1.06    1.14   0 0.99275-0.69823-0.11286 0.63368 0.02481 0.31072
   4  12   4  178.77    2.33   0 0.99313-0.70057-0.10938 0.67740 0.02871 0.19590
   4  12   5   21.24    1.73   0 0.99441-0.70118-0.09514 0.66348 0.04465 0.23523
   5  -6 -13   -0.49    1.91   0 0.99404-0.65540-0.09980-0.18416 0.03945-0.74597
   5   1 -13    6.93    1.73   0 0.99463-0.65405-0.09204 0.14002 0.04811-0.75448
   5   2 -13    5.50    1.88   0 0.99391-0.65124-0.10132 0.19694 0.03774-0.74349
   5   5 -12   -0.10    1.70   0 0.99404-0.64941-0.09980 0.33733 0.03945-0.69093
   5   5  13   17.29    1.84   0 0.99352-0.62393-0.10558 0.34428 0.03297 0.68783
   5   7 -11    1.62    1.84   0 0.99409-0.64804-0.09920 0.43041 0.04011-0.63674
   5   7  12    4.76    1.59   0 0.99372-0.62351-0.10345 0.43788 0.03537 0.63323
   5   8  11   24.74    1.40   0 0.99234-0.62339-0.11634 0.49641 0.02090 0.58907
   5   9  11   -1.77    1.65   0 0.99426-0.62509-0.09718 0.52284 0.04237 0.56413
   5  10  10   31.43    2.01   0 0.99423-0.62497-0.09756 0.57254 0.04195 0.51448
   5  11   9   17.35    1.81   0 0.99432-0.62576-0.09631 0.61838 0.04335 0.45825
   5  12   7   46.08    1.53   0 0.99301-0.62664-0.11054 0.67881 0.02741 0.36348
   5  13   5   10.94    1.42   0 0.99295-0.62948-0.11112 0.72584 0.02676 0.25396
   5  13   6   -2.08    1.64   0 0.99420-0.62928-0.09791 0.71115 0.04156 0.29177
   5  14  -2   51.11    2.14   0 0.99471-0.63774-0.09074 0.75279 0.04956-0.15137
   5  14  -1   39.56    2.19   0 0.99398-0.63647-0.10054 0.76311 0.03861-0.08558
   5  14   0   24.43    2.03   0 0.99354-0.63455-0.10538 0.76817 0.03320-0.02552
   5  14   1    1.35    1.74   0 0.99360-0.63265-0.10475 0.76885 0.03390 0.02857
   5  14   2    2.45    1.62   0 0.99394-0.63211-0.10098 0.76502 0.03813 0.07922
   5  14   3   -0.81    1.72   0 0.99400-0.62951-0.10038 0.75903 0.03880 0.13261
   6   7 -12    1.13    2.06   0 0.99494-0.57870-0.08695 0.42088 0.05378-0.70635
   6  10 -10    0.17    2.59   0 0.99557-0.57623-0.05521 0.52937 0.08897-0.62933
   6  13  -7    0.01    2.29   0 0.99536-0.57221-0.07764 0.69256 0.06414-0.44267
   6  14  -5   -0.04    1.62   0 0.99395-0.56866-0.10096 0.76310 0.03815-0.30659
   6  15  -2    0.28    1.94   0 0.99407-0.56494-0.09951 0.81056 0.03977-0.14094
   6  15  -1   22.17    1.93   0 0.99310-0.56336-0.10967 0.81964 0.02839-0.07407
   6  15   0    0.04    1.23   0 0.99272-0.56191-0.11315 0.82309 0.02448-0.01838
   6  15   1    1.93    1.32   0 0.99279-0.56001-0.11257 0.82302 0.02513 0.03867
   6  15   2   -0.63    1.34   0 0.99323-0.56033-0.10851 0.81863 0.02969 0.08626
   6  15   3   -2.33    1.88   0 0.99396-0.56038-0.10081 0.81185 0.03831 0.13259
   0  -4   1    7.14    2.62   0 0.99518-0.99538-0.08335-0.10174 0.05760-0.00524
   0  -3   0    0.45    2.72   0 0.99557-0.99665-0.07185-0.07011 0.07040-0.07054
   0  -2  -1 1342.13    9.57   0 0.99464-0.99635-0.09268 0.00007 0.04720-0.10391
   0  -2   3    2.68    2.35   0 0.99550-0.99327-0.07503-0.01789 0.06686 0.09638
   0  -1   3  599.75    7.20   0 0.99553-0.99294-0.07358 0.02816 0.06848 0.09456
   0   0   2  291.80    5.26   0 0.99507-0.99296-0.08569 0.08726 0.05500 0.05333
   1 -10   0   50.90    1.66   0 0.99472-0.92748-0.09151-0.37885 0.04850-0.04824
   1 -10   1   59.90    1.86   0 0.99490-0.92661-0.08860-0.38165 0.05175 0.00335
   1  -9  -2  102.59    2.21   0 0.99539-0.92820-0.07826-0.34472 0.06327-0.17234
   1  -9   4   18.80    2.30   0 0.99557-0.92367-0.07205-0.35093 0.07018 0.14950
   1  -8  -3   79.40    1.99   0 0.99554-0.93069-0.07352-0.30224 0.06854-0.23278
   1  -7  -4  302.38    3.00   0 0.99549-0.93118-0.07520-0.25342 0.06667-0.28578
   1  -6  -5  145.00    2.03   0 0.99502-0.93167-0.08656-0.19501 0.05402-0.32817
   1  -4   8   10.87    2.13   0 0.99567-0.91837-0.06422-0.12237 0.07886 0.36072
   1  -3  -6  137.89    2.14   0 0.99483-0.93128-0.08977-0.05020 0.05045-0.37927
   1  -3   8    4.71    1.86   0 0.99543-0.91764-0.07726-0.06221 0.06438 0.37594
   1  -2  -6  124.85    2.08   0 0.99502-0.93085-0.08656-0.00631 0.05402-0.38298
   1  -2   8  212.88    3.18   0 0.99525-0.91748-0.08188-0.01037 0.05924 0.38030
   1  -1  -6    0.64    1.24   0 0.99490-0.93072-0.08860 0.04184 0.05175-0.38009
   1  -1   8   -0.90    1.70   0 0.99533-0.91681-0.07986 0.03400 0.06150 0.37987
   1   0   8   -1.19    1.66   0 0.99545-0.91600-0.07665 0.07789 0.06507 0.37491
   1   2  -5   14.85    2.14   0 0.99559-0.92888-0.07110 0.16646 0.07123-0.34506
   1   2   7    0.01    1.21   0 0.99478-0.91575-0.09064 0.18562 0.04947 0.33575
   1   3   7  220.35    2.68   0 0.99556-0.91667-0.07261 0.21627 0.06955 0.31475
   1   4   6  101.51    2.15   0 0.99536-0.91808-0.07906 0.26998 0.06238 0.26711
   1   5  -3  747.78   12.97   0 0.99495-0.92516-0.03645 0.27376 0.10949-0.27358
   1   5   5  115.48    2.24   0 0.99540-0.91879-0.07802 0.31595 0.06354 0.21093
   1   6  -1  318.92    4.43   0 0.99533-0.92348-0.07980 0.36452 0.06156-0.11590
   1   6   3   49.30    1.59   0 0.99515-0.91880-0.08394 0.36832 0.05695 0.10756
   2 -13   0    1.39    1.23   0 0.99468-0.85704-0.09209-0.52015 0.04785-0.04636
   2 -13   1   71.04    1.84   0 0.99482-0.85624-0.09006-0.52180 0.05012 0.00676
   2 -12  -3    5.77    1.22   0 0.99487-0.86057-0.08918-0.47540 0.05110-0.21379
   2 -12  -2  138.06    2.56   0 0.99552-0.85997-0.07406-0.49072 0.06794-0.17561
   2 -11  -4   73.28    2.06   0 0.99542-0.86113-0.07754-0.43981 0.06407-0.28134
   2 -11   6   61.88    3.44   0 0.99560-0.85082-0.05363-0.46350 0.09057 0.24141
   2 -10  -5   18.64    1.67   0 0.99550-0.86237-0.07469-0.39539 0.06724-0.33990
   2  -9  -6   23.77    1.67   0 0.99543-0.86255-0.07723-0.34590 0.06442-0.39117
   2  -8  -7   15.99    1.20   0 0.99494-0.86347-0.08802-0.28787 0.05240-0.43468
   2  -8   9   45.89    3.08   0 0.99567-0.84756-0.06383-0.31155 0.07929 0.41730
   2  -6  -8    0.33    1.08   0 0.99472-0.86404-0.09151-0.19302 0.04850-0.48375
   2  -6  10    1.66    2.23   0 0.99566-0.84551-0.06671-0.21449 0.07610 0.47516
   2  -5  -8   46.19    1.90   0 0.99541-0.86196-0.07763-0.15667 0.06397-0.50038
   2   1  -8   27.82    1.89   0 0.99559-0.86151-0.07103 0.11905 0.07130-0.50830
   2   1  10    1.91    1.21   0 0.99466-0.84152-0.09239 0.14062 0.04752 0.50412
   2   2  -8    0.28    1.24   0 0.99490-0.86082-0.08860 0.18385 0.05175-0.48833
   2   2  10   43.61    1.92   0 0.99536-0.84404-0.07905 0.17605 0.06239 0.48859
   2   4  -7    0.44    1.78   0 0.99556-0.85963-0.07256 0.26198 0.06961-0.45115
   2   4   9   -0.19    1.25   0 0.99497-0.84226-0.08744 0.27746 0.05305 0.44291
   2   6   8   77.14    2.09   0 0.99545-0.84356-0.07639 0.36193 0.06535 0.37573
   2   7   7   73.87    1.98   0 0.99542-0.84439-0.07753 0.41019 0.06409 0.32196
   2   8   5    1.84    1.16   0 0.99470-0.84460-0.09180 0.47022 0.04817 0.22960
   2   8   6   32.69    1.70   0 0.99556-0.84513-0.07230 0.45165 0.06989 0.26104
   2   9  -1  114.54    2.72   0 0.99509-0.85096-0.08515 0.51125 0.05560-0.10837
   2   9   2  412.68    3.27   0 0.99461-0.84719-0.09326 0.51942 0.04655 0.06507
   2   9   3   47.67    1.50   0 0.99510-0.84663-0.08510 0.51126 0.05565 0.11071
   2   9   4    7.13    1.65   0 0.99552-0.84639-0.07413 0.49930 0.06787 0.15343
   3 -15  -1   11.96    1.29   0 0.99476-0.78770-0.09093-0.61538 0.04915-0.10084
   3 -15   0   -1.06    1.59   0 0.99527-0.78678-0.08131-0.62127 0.05987-0.05451
   3 -15   1    3.38    1.83   0 0.99529-0.78550-0.08084-0.62399 0.06040-0.00263
   3 -15   2    7.69    1.65   0 0.99507-0.78481-0.08563-0.62063 0.05506 0.05807
   3 -14  -4   42.81    1.64   0 0.99458-0.79088-0.09355-0.56531 0.04622-0.26217
   3 -14  -3   -0.61    1.74   0 0.99541-0.79041-0.07781-0.58169 0.06377-0.22282
   3 -14   5    1.06    1.84   0 0.99559-0.78203-0.07110-0.58767 0.07123 0.20652
   3 -13  -5    6.88    1.59   0 0.99531-0.79099-0.08036-0.52930 0.06093-0.33122
   3 -12  -6    4.69    1.64   0 0.99542-0.79217-0.07756-0.48703 0.06405-0.39005
   3 -11  -7    1.39    1.53   0 0.99542-0.79252-0.07752-0.43925 0.06409-0.44378
   3 -10  -8   28.85    1.36   0 0.99505-0.79418-0.08598-0.38442 0.05467-0.49021
   3  -8  -9    4.27    1.49   0 0.99532-0.79404-0.08025-0.29462 0.06106-0.54980
   3  -6 -10    1.50    1.16   0 0.99468-0.79449-0.09209-0.18968 0.04785-0.59373
   3  -6  12   11.52    1.91   0 0.99567-0.77249-0.06493-0.21627 0.07807 0.58400
   3  -5 -10   14.47    1.61   0 0.99537-0.79228-0.07895-0.15540 0.06251-0.60644
   3  -5  12    1.20    1.66   0 0.99541-0.77275-0.07779-0.15694 0.06380 0.60143
   3  -4 -10    1.31    1.63   0 0.99548-0.79468-0.07552-0.11238 0.06631-0.61256
   3   1 -10    2.69    1.61   0 0.99546-0.79245-0.07606 0.12407 0.06572-0.61087
   3   1  12    0.94    1.29   0 0.99499-0.76865-0.08714 0.13588 0.05337 0.60935
   3   2 -10  140.04    2.37   0 0.99480-0.79191-0.09035 0.18542 0.04980-0.59484
   3   2  12   33.64    2.03   0 0.99543-0.76993-0.07723 0.17374 0.06442 0.59797
   3   4  11   33.29    1.46   0 0.99483-0.76944-0.08977 0.28066 0.05045 0.55672
   3   5  11   -1.84    1.65   0 0.99548-0.76918-0.07562 0.31341 0.06620 0.53952
   3   6  -8   10.83    2.13   0 0.99559-0.78842-0.05336 0.33683 0.09087-0.52580
   3   6  10   -0.57    1.14   0 0.99494-0.76974-0.08802 0.37310 0.05240 0.49982
   3   8   9  100.84    2.20   0 0.99555-0.77084-0.07292 0.45275 0.06920 0.42849
   3   9   8    6.94    1.55   0 0.99556-0.77115-0.07269 0.49989 0.06947 0.37327
   3  10   6  116.35    1.83   0 0.99510-0.77258-0.08510 0.55884 0.05565 0.27723
   3  11  -2  194.83    3.12   0 0.99536-0.78132-0.07911 0.59968 0.06232-0.16787
   3  11   3  115.90    1.97   0 0.99470-0.77488-0.09180 0.61244 0.04817 0.12014
   3  11   4   69.78    2.10   0 0.99535-0.77590-0.07948 0.60059 0.06192 0.16171
   4 -16  -3    0.93    1.66   0 0.99534-0.71879-0.07959-0.66860 0.06179-0.22081
   4 -16  -2   10.83    1.72   0 0.99557-0.71916-0.07208-0.68091 0.07014-0.17447
   4 -16   4   12.54    2.03   0 0.99567-0.71241-0.06453-0.68788 0.07852 0.14666
   4 -15  -5   20.38    1.80   0 0.99524-0.72147-0.08200-0.62248 0.05911-0.32715
   4 -14  -6    0.33    1.71   0 0.99551-0.72215-0.07460-0.58430 0.06734-0.39188
   4 -14   8    0.43    2.48   0 0.99528-0.70768-0.04329-0.61492 0.10197 0.34223
   4 -13  -7   -1.08    1.46   0 0.99551-0.72415-0.07446-0.54180 0.06750-0.44685
   4 -12  -8   12.73    1.71   0 0.99555-0.72473-0.07314-0.49103 0.06896-0.50231
   4 -11  -9    2.32    1.69   0 0.99542-0.72334-0.07754-0.43837 0.06408-0.55140
   4 -10 -10    1.27    1.26   0 0.99470-0.72478-0.09180-0.37817 0.04817-0.59301
   4  -9 -10    2.14    1.69   0 0.99550-0.72480-0.07489-0.34844 0.06701-0.61108
   4  -8 -11    0.50    1.19   0 0.99454-0.72560-0.09413-0.28404 0.04557-0.64281
   4  -7 -11    4.43    1.67   0 0.99538-0.72365-0.07863-0.24918 0.06286-0.65927
   4  -7  13    7.34    1.95   0 0.99535-0.70032-0.07931-0.24961 0.06210 0.65691
   4  -3 -12    7.90    1.40   0 0.99468-0.72504-0.09209-0.04816 0.04785-0.70100
   4  -3  14    0.32    1.65   0 0.99555-0.69774-0.07300-0.06338 0.06912 0.70054
   4  -2 -12    3.23    1.32   0 0.99476-0.72440-0.09093-0.00202 0.04915-0.70298
   4  -2  14   -0.03    1.77   0 0.99558-0.69764-0.07139-0.02037 0.07091 0.70291
   4  -1 -12   22.03    1.39   0 0.99468-0.72426-0.09209 0.04556 0.04785-0.70125
   4  -1  14    4.33    1.65   0 0.99558-0.69794-0.07173 0.02665 0.07052 0.70213
   4   3 -11    0.04    1.67   0 0.99559-0.72210-0.07110 0.21404 0.07123-0.66965
   4   3  13    6.04    1.36   0 0.99500-0.69552-0.08685 0.23084 0.05370 0.66568
   4   4  13    0.79    1.79   0 0.99552-0.69678-0.07402 0.26538 0.06799 0.65138
   4   6  12    0.61    1.65   0 0.99534-0.69625-0.07956 0.36457 0.06182 0.60252
   4   7  11   15.92    1.31   0 0.99466-0.69678-0.09239 0.42478 0.04752 0.56152
   4   8  11   -1.36    1.58   0 0.99550-0.69761-0.07475 0.45311 0.06718 0.53817
   4   9  10   15.36    1.75   0 0.99543-0.69865-0.07703 0.50427 0.06463 0.48989
   4  10   9   86.85    2.20   0 0.99543-0.69990-0.07725 0.55158 0.06439 0.43505
   4  11   7   -0.08    1.17   0 0.99458-0.70023-0.09355 0.61452 0.04622 0.34242
   4  11   8   16.62    1.74   0 0.99554-0.70024-0.07326 0.59435 0.06883 0.37542
   4  12  -4   68.86    2.56   0 0.99541-0.71228-0.07778 0.64557 0.06381-0.27690
   4  12   6   25.88    1.82   0 0.99539-0.70293-0.07842 0.64694 0.06309 0.27207
   4  13  -1    2.01    1.72   0 0.99540-0.70846-0.07789 0.69388 0.06368-0.11266
   4  13   0   93.23    2.00   0 0.99500-0.70698-0.08685 0.70160 0.05370-0.04783
   4  13   1   10.00    1.36   0 0.99490-0.70562-0.08860 0.70349 0.05175 0.00900
   4  13   2   24.56    1.43   0 0.99505-0.70480-0.08598 0.70082 0.05467 0.06086
   4  13   3    4.12    1.71   0 0.99542-0.70493-0.07759 0.69435 0.06401 0.10681
   4  13   4    1.64    1.59   0 0.99560-0.70329-0.07080 0.68632 0.07156 0.15396
   5 -10 -11    0.29    1.81   0 0.99541-0.65572-0.07781-0.39432 0.06377-0.65915
   5  -8 -12    0.36    1.65   0 0.99518-0.65566-0.08335-0.29177 0.05760-0.71076
   5  -5 -13   -1.51    1.40   0 0.99466-0.65603-0.09239-0.14427 0.04752-0.75407
   5  -4 -13    4.57    1.45   0 0.99503-0.65539-0.08627-0.10069 0.05435-0.76149
   5  -3 -13   -0.61    1.79   0 0.99532-0.65522-0.08015-0.06215 0.06117-0.76556
   5  -2 -13    5.45    1.87   0 0.99538-0.65390-0.07864-0.01371 0.06285-0.76879
   5  -1 -13    7.81    1.93   0 0.99541-0.65356-0.07777 0.03171 0.06382-0.76824
   5   0 -13    3.07    1.72   0 0.99524-0.65385-0.08202 0.08398 0.05909-0.76364
   5   4 -12   -0.47    1.77   0 0.99557-0.65177-0.07226 0.26281 0.06993-0.72181
   5   6  13    5.79    1.41   0 0.99478-0.62327-0.09064 0.37652 0.04947 0.67143
   5   8  12    2.02    1.28   0 0.99502-0.62426-0.08656 0.46648 0.05402 0.61192
   5  10  11    2.62    1.69   0 0.99550-0.62530-0.07480 0.54681 0.06712 0.54108
   5  11  10   10.69    1.71   0 0.99553-0.62716-0.07372 0.59447 0.06832 0.48672
   5  12   8    0.66    1.23   0 0.99478-0.62695-0.09064 0.65911 0.04947 0.39712
   5  13  -5   20.65    2.22   0 0.99541-0.64249-0.07766 0.69285 0.06394-0.32959
   5  13   7   21.64    1.89   0 0.99541-0.63046-0.07774 0.69396 0.06385 0.32766
   5  14  -3    1.31    1.67   0 0.99560-0.64002-0.07051 0.73257 0.07188-0.22917
   5  14   4   31.42    1.60   0 0.99502-0.63205-0.08656 0.74839 0.05402 0.17305
   5  14   5    5.69    1.82   0 0.99550-0.63144-0.07489 0.73743 0.06701 0.21480
   6   4 -13    0.71    1.75   0 0.99564-0.58193-0.06817 0.25924 0.07447-0.78017
   6  15  -3    8.26    1.98   0 0.99518-0.56773-0.08329 0.79413 0.05767-0.21239
   0  -3   1 1512.92   14.09   0 0.99517-0.99524-0.04052-0.09893 0.10439-0.05115
   0  -3   3  800.56   14.82   0 0.99422-0.99238-0.02556-0.11410 0.12082 0.04246
   0  -2   0 3101.92   18.40   0 0.99548-0.99621-0.04847-0.04422 0.09563-0.09730
   0   0   3    0.22    2.36   0 0.99561-0.99341-0.05418 0.05436 0.08933 0.07823
   0   1   1 1349.61   11.57   0 0.99554-0.99407-0.05076 0.09971 0.09311-0.03919
   0   1   2 1019.51    8.27   0 0.99561-0.99320-0.05420 0.10308 0.08931 0.01914
   1  -9  -1  256.56    2.80   0 0.99566-0.92932-0.06530-0.35775 0.07702-0.13180
   1  -9   0   55.67    2.06   0 0.99557-0.92821-0.05193-0.37123 0.09182-0.09142
   1  -9   3  116.81    2.97   0 0.99540-0.92504-0.04619-0.37697 0.09814 0.06674
   1  -8  -2   10.18    1.70   0 0.99554-0.92975-0.05067-0.32492 0.09321-0.20255
   1  -6  -4  939.68    4.91   0 0.99561-0.93080-0.05392-0.22763 0.08962-0.30862
   1  -5  -5    0.01    1.15   0 0.99559-0.93201-0.07056-0.16682 0.07118-0.34257
   1  -4  -5  749.37    4.53   0 0.99562-0.93006-0.05461-0.13256 0.08885-0.36255
   1   1   8   -0.17    1.18   0 0.99565-0.91602-0.06705 0.11538 0.07508 0.36506
   1   2   8  209.92    2.72   0 0.99561-0.91673-0.05438 0.15125 0.08911 0.34996
   1   4   7  144.00    2.27   0 0.99560-0.91636-0.05390 0.24482 0.08963 0.29461
   1   5   6    1.16    1.48   0 0.99562-0.91778-0.05466 0.29287 0.08879 0.24387
   1   6   4   14.81    1.28   0 0.99562-0.91851-0.06910 0.35340 0.07281 0.14674
   1   6   5  217.55    2.64   0 0.99557-0.91748-0.05218 0.33739 0.09153 0.18291
   1   7   1  467.00    4.16   0 0.99555-0.92083-0.05106 0.38285 0.09277-0.03779
   1   7   2   62.38    2.10   0 0.99556-0.91998-0.05186 0.38386 0.09189 0.01797
   2 -12  -1    7.68    1.66   0 0.99567-0.85849-0.05951-0.50485 0.08343-0.13562
   2 -12   0   70.46    2.03   0 0.99554-0.85811-0.05080-0.51410 0.09306-0.09098
   2 -12   3   18.50    1.82   0 0.99545-0.85503-0.04748-0.51744 0.09673 0.06978
   2 -12   4   55.66    2.41   0 0.99567-0.85335-0.06083-0.50351 0.08198 0.13965
   2 -11  -3   37.76    1.83   0 0.99563-0.85915-0.05553-0.46154 0.08784-0.24960
   2 -10  -4    4.91    1.60   0 0.99553-0.86125-0.05037-0.42009 0.09353-0.31104
   2  -9  -5   57.23    1.83   0 0.99552-0.86198-0.05010-0.37323 0.09383-0.36587
   2  -8  -6   20.45    1.63   0 0.99561-0.86124-0.05446-0.32110 0.08902-0.41503
   2  -7  -7   11.91    1.17   0 0.99559-0.86329-0.07056-0.25789 0.07118-0.45366
   2  -6  -7   23.51    1.65   0 0.99561-0.86256-0.05424-0.22774 0.08926-0.47102
   2  -4  -8   56.69    1.57   0 0.99559-0.86357-0.07056-0.11676 0.07118-0.50806
   2  -3  -8    3.63    1.17   0 0.99567-0.86331-0.06354-0.07748 0.07897-0.51570
   2  -3  11   -1.15    1.57   0 0.99560-0.84328-0.05345-0.08513 0.09014 0.51571
   2  -2  -8    0.02    1.60   0 0.99561-0.86141-0.05418-0.03907 0.08933-0.52287
   2  -2  11   13.61    1.71   0 0.99565-0.84409-0.05709-0.03541 0.08611 0.51951
   2  -1  -8   26.71    1.80   0 0.99563-0.86110-0.05522 0.00931 0.08818-0.52420
   2  -1  11    1.89    1.53   0 0.99565-0.84320-0.05691 0.01104 0.08631 0.52149
   2   0  -8  115.24    2.38   0 0.99567-0.86157-0.06035 0.06157 0.08250-0.51907
   2   0  11    0.47    1.71   0 0.99564-0.84204-0.05652 0.05782 0.08674 0.51985
   2   1  11    2.47    1.75   0 0.99555-0.84174-0.05123 0.09985 0.09258 0.51365
   2   3  10   32.32    1.47   0 0.99563-0.84224-0.06851 0.21230 0.07346 0.47726
   2   4  10   15.17    1.69   0 0.99560-0.84247-0.05360 0.24496 0.08997 0.46106
   2   5   9   27.18    1.36   0 0.99562-0.84287-0.06880 0.30658 0.07313 0.42242
   2   6   9   45.97    1.82   0 0.99551-0.84245-0.04955 0.33532 0.09445 0.40129
   2   7   8  520.79    3.59   0 0.99561-0.84339-0.05391 0.38671 0.08963 0.35116
   2   8   7   63.73    1.97   0 0.99556-0.84412-0.05185 0.43174 0.09190 0.29406
   2   9  -2    0.49    1.74   0 0.99564-0.85336-0.05593 0.48350 0.08740-0.19473
   2   9   5   34.39    1.73   0 0.99566-0.84575-0.05876 0.48551 0.08426 0.19211
   2  10   1   56.10    2.03   0 0.99548-0.84901-0.04844 0.52181 0.09566-0.03900
   2  10   2   -0.44    1.65   0 0.99556-0.84835-0.05184 0.52225 0.09191 0.01929
   3 -14  -2   15.34    1.36   0 0.99567-0.78995-0.06384-0.59484 0.07864-0.18474
   3 -14  -1   31.20    1.84   0 0.99557-0.78886-0.05221-0.60682 0.09151-0.14250
   3 -14   4    1.29    1.60   0 0.99547-0.78307-0.04832-0.61088 0.09579 0.12764
   3 -13  -4   37.60    1.49   0 0.99567-0.79169-0.06325-0.54849 0.07929-0.29530
   3 -12  -5   65.05    1.96   0 0.99561-0.79148-0.05422-0.51043 0.08929-0.35961
   3 -11  -6   31.80    1.79   0 0.99559-0.79310-0.05332-0.46427 0.09028-0.41584
   3 -10  -7   32.33    1.73   0 0.99562-0.79166-0.05460-0.41506 0.08887-0.46845
   3  -9  -8    0.53    1.16   0 0.99565-0.79426-0.06705-0.35656 0.07508-0.51098
   3  -8  -8    2.53    1.42   0 0.99558-0.79453-0.05252-0.32663 0.09116-0.53041
   3  -7  -9    2.89    1.19   0 0.99564-0.79459-0.06734-0.26184 0.07475-0.56536
   3  -6  -9   24.36    1.74   0 0.99560-0.79429-0.05360-0.22842 0.08997-0.58011
   3  -3 -10   -0.83    1.26   0 0.99563-0.79512-0.06851-0.07469 0.07346-0.61731
   3  -3  13    1.75    1.57   0 0.99547-0.76928-0.04837-0.09073 0.09574 0.61866
   3  -2 -10  143.64    2.25   0 0.99566-0.79414-0.06530-0.02801 0.07702-0.62206
   3  -2  13   12.84    1.80   0 0.99550-0.77024-0.04935-0.04327 0.09467 0.62211
   3  -1 -10    1.30    1.35   0 0.99566-0.79367-0.06500 0.01894 0.07735-0.62257
   3  -1  13    4.42    1.71   0 0.99553-0.76950-0.05023 0.00523 0.09369 0.62407
   3   0 -10    0.89    1.31   0 0.99563-0.79321-0.06793 0.06904 0.07410-0.61902
   3   0  13   23.16    1.77   0 0.99547-0.76972-0.04832 0.05092 0.09579 0.62143
   3   3  12   26.30    1.43   0 0.99565-0.76976-0.06676 0.21042 0.07540 0.58637
   3   4  -9   34.92    2.16   0 0.99568-0.79039-0.06170 0.25106 0.08101-0.57073
   3   4  12   -0.49    1.81   0 0.99561-0.76946-0.05418 0.24600 0.08933 0.57278
   3   6  11   -0.78    1.62   0 0.99561-0.77047-0.05418 0.34069 0.08933 0.52104
   3   7  10   91.59    1.80   0 0.99563-0.76997-0.06793 0.40047 0.07410 0.47809
   3   9   9  199.23    2.55   0 0.99551-0.77052-0.04958 0.47665 0.09441 0.40280
   3  10   7    0.87    1.13   0 0.99565-0.77190-0.06617 0.53979 0.07605 0.31273
   3  11  -3  126.85    2.92   0 0.99546-0.78209-0.04800 0.56841 0.09615-0.25684
   3  11   5   76.92    1.70   0 0.99563-0.77375-0.06822 0.58916 0.07378 0.20425
   3  11   6   14.57    1.67   0 0.99560-0.77301-0.05344 0.57464 0.09014 0.24260
   3  12   0   14.68    1.69   0 0.99550-0.77857-0.04920 0.61730 0.09482-0.09094
   3  12   1    9.13    1.76   0 0.99561-0.77816-0.05442 0.62233 0.08906-0.02969
   3  12   2   14.01    1.92   0 0.99561-0.77701-0.05430 0.62278 0.08919 0.02441
   3  12   3    8.70    1.78   0 0.99554-0.77604-0.05067 0.61886 0.09321 0.07480
   4 -16  -1    0.04    1.31   0 0.99567-0.71870-0.06237-0.69088 0.08026-0.12856
   4 -16   0    1.20    1.80   0 0.99560-0.71678-0.05389-0.69874 0.08965-0.08490
   4 -16   1   -0.32    1.73   0 0.99554-0.71604-0.05067-0.70284 0.09321-0.03360
   4 -16   2   27.45    2.20   0 0.99551-0.71439-0.04979-0.70393 0.09418 0.02131
   4 -16   3   -1.23    1.79   0 0.99561-0.71462-0.05418-0.69800 0.08933 0.08177
   4 -15  -4    1.25    1.30   0 0.99566-0.72092-0.06588-0.64005 0.07637-0.29155
   4 -15  -3    9.03    1.83   0 0.99552-0.72080-0.05008-0.65555 0.09385-0.25338
   4 -15   6    4.07    2.19   0 0.99512-0.71000-0.03937-0.66575 0.10566 0.22986
   4 -14  -5   32.97    2.02   0 0.99560-0.72196-0.05367-0.60497 0.08989-0.35870
   4 -11  -8    8.28    1.74   0 0.99554-0.72380-0.05101-0.46692 0.09283-0.52644
   4 -10  -9    7.91    1.24   0 0.99567-0.72496-0.06033-0.40986 0.08253-0.57106
   4  -8 -10    0.57    1.52   0 0.99567-0.72495-0.05916-0.31669 0.08382-0.62796
   4  -6 -11    4.33    1.21   0 0.99560-0.72563-0.07026-0.21097 0.07151-0.67016
   4  -5 -11    5.05    1.62   0 0.99567-0.72472-0.05995-0.17438 0.08295-0.68147
   4  -4 -11    6.88    1.73   0 0.99557-0.72526-0.05213-0.13568 0.09159-0.68950
   4  -4  14    8.86    1.99   0 0.99567-0.69826-0.06073-0.12622 0.08209 0.69225
   4   0  14   13.68    1.49   0 0.99563-0.69695-0.06822 0.06952 0.07378 0.70015
   4   1  14    4.76    1.37   0 0.99567-0.69660-0.06354 0.11365 0.07897 0.69453
   4   2 -11    7.95    1.76   0 0.99561-0.72209-0.05418 0.14919 0.08933-0.68764
   4   2  14    4.18    1.82   0 0.99563-0.69668-0.05555 0.15257 0.08781 0.68684
   4   3  14    2.54    1.66   0 0.99545-0.69611-0.04774 0.19196 0.09644 0.67741
   4   5 -10    2.94    1.92   0 0.99531-0.72018-0.04372 0.28126 0.10087-0.64508
   4   5  13    0.43    1.66   0 0.99567-0.69609-0.06120 0.29936 0.08156 0.63735
   4   7  12   13.35    1.36   0 0.99568-0.69794-0.06150 0.39353 0.08123 0.58217
   4   9  11    5.81    1.72   0 0.99554-0.69735-0.05096 0.47855 0.09288 0.51627
   4  10  10    2.27    1.74   0 0.99560-0.69814-0.05364 0.52834 0.08993 0.46491
   4  11  -6   21.74    2.87   0 0.99471-0.71359-0.03238 0.55316 0.11334-0.43616
   4  11   9   -1.32    1.70   0 0.99559-0.69910-0.05301 0.57404 0.09062 0.40677
   4  12   7   11.34    1.27   0 0.99567-0.70043-0.06325 0.63143 0.07929 0.31034
   4  13  -2    9.69    1.66   0 0.99567-0.70970-0.06354 0.67869 0.07897-0.18251
   4  13   5   40.53    1.94   0 0.99567-0.70271-0.05973 0.67500 0.08319 0.19651
   5 -15  -6   -0.14    1.84   0 0.99561-0.65127-0.05418-0.64999 0.08933-0.41169
   5 -14  -7    1.67    1.70   0 0.99555-0.65268-0.05128-0.60778 0.09253-0.47101
   5 -13  -8    1.01    1.72   0 0.99554-0.65330-0.05096-0.56083 0.09288-0.52613
   5 -12  -9   -0.53    1.77   0 0.99562-0.65443-0.05477-0.51122 0.08868-0.57380
   5 -11 -10    4.07    1.43   0 0.99567-0.65497-0.06442-0.45253 0.07799-0.62104
   5  -9 -11    6.89    1.31   0 0.99568-0.65569-0.06208-0.36083 0.08059-0.67810
   5  -7 -12    2.23    1.27   0 0.99559-0.65564-0.07056-0.25768 0.07118-0.72371
   5  -6 -12    0.67    1.59   0 0.99564-0.65498-0.05609-0.22353 0.08722-0.73550
   5  -5 -12    1.05    1.74   0 0.99551-0.65461-0.04979-0.18427 0.09418-0.74654
   5   3 -12   -0.11    1.85   0 0.99558-0.65200-0.05272 0.19635 0.09094-0.74302
   5   6 -11   -0.66    1.74   0 0.99556-0.65100-0.05169 0.33488 0.09208-0.69074
   5   8 -10   15.17    2.54   0 0.99532-0.64846-0.04387 0.42073 0.10070-0.64306
   5  12   9    0.79    1.32   0 0.99561-0.62690-0.06968 0.63834 0.07216 0.42886
   5  13   8    6.51    1.28   0 0.99567-0.62857-0.06091 0.67664 0.08188 0.36412
   5  14   6   41.38    1.67   0 0.99568-0.63079-0.06179 0.72409 0.08091 0.25561
   5  15  -1    4.28    1.79   0 0.99534-0.63755-0.04446 0.75380 0.10005-0.14721
   5  15   0   20.95    1.99   0 0.99559-0.63661-0.05321 0.76335 0.09039-0.08255
   5  15   1   28.68    1.99   0 0.99565-0.63576-0.05724 0.76727 0.08594-0.02305
   5  15   2   23.75    2.04   0 0.99564-0.63449-0.05653 0.76726 0.08673 0.03058
   5  15   3    7.73    1.87   0 0.99560-0.63353-0.05337 0.76358 0.09022 0.08173
   5  15   4   -1.15    1.55   0 0.99553-0.63206-0.05052 0.75743 0.09337 0.12993
   6   3 -13   -0.09    1.91   0 0.99558-0.58309-0.05242 0.19406 0.09127-0.79848
   6   6 -12    1.12    2.05   0 0.99504-0.57916-0.03789 0.32328 0.10729-0.75705
   6  14  -6   -0.62    2.21   0 0.99522-0.57095-0.04158 0.70342 0.10322-0.42662
   0  -2   4  215.86    4.45   0 0.99430-0.99146-0.02698-0.06531 0.11867 0.09915
   0  -1   0    0.93    2.93   0 0.99420-0.99471-0.02579-0.01929 0.11999-0.11995
   0  -1   4  372.93    4.96   0 0.99497-0.99169-0.03739-0.00800 0.10724 0.11080
   0   0   4  201.60    3.52   0 0.99480-0.99115-0.03428 0.03620 0.11066 0.10744
   0   1   3  589.45    5.43   0 0.99522-0.99190-0.04250 0.09141 0.10161 0.06155
   0   1   4  375.33    4.21   0 0.99417-0.98993-0.02530 0.07442 0.12052 0.09745
   0   2   2  477.13    5.50   0 0.99428-0.99141-0.02670 0.12281 0.11898-0.01062
   1  -9   1   36.05    1.64   0 0.99522-0.92721-0.04250-0.38062 0.10161-0.04670
   1  -9   2  207.10    3.45   0 0.99495-0.92541-0.03700-0.38571 0.10767 0.00227
   1  -8  -1   63.78    2.14   0 0.99445-0.92789-0.02907-0.34681 0.11639-0.17097
   1  -8   5   11.67    2.58   0 0.99111-0.91795 0.00240-0.37806 0.15078 0.12392
   1  -7  -3  161.27    2.20   0 0.99541-0.93054-0.04777-0.28086 0.09580-0.26036
   1  -5  -4   36.42    1.99   0 0.99462-0.92867-0.03155-0.20241 0.11366-0.33224
   1  -5   8    9.57    1.82   0 0.99478-0.91834-0.03407-0.20009 0.11089 0.32886
   1  -3  -5   28.26    1.50   0 0.99533-0.93054-0.04543-0.09473 0.09838-0.37237
   1  -3   9    2.73    1.59   0 0.99397-0.91519-0.02293-0.11662 0.12312 0.37124
   1  -2  -5   15.34    1.38   0 0.99495-0.92963-0.03693-0.05600 0.10775-0.38199
   1  -2   9    5.26    1.71   0 0.99460-0.91585-0.03115-0.06152 0.11410 0.38122
   1  -1  -5    3.48    1.81   0 0.99457-0.92892-0.03077-0.01498 0.11452-0.38687
   1  -1   9    6.98    1.64   0 0.99487-0.91580-0.03555-0.00942 0.10926 0.38506
   1   0  -5  170.58    3.12   0 0.99463-0.92780-0.03159 0.03309 0.11362-0.38750
   1   0   9   98.82    2.26   0 0.99477-0.91568-0.03383 0.03616 0.11115 0.38305
   1   1  -5    3.59    1.44   0 0.99530-0.92882-0.04455 0.09344 0.09935-0.37316
   1   1   9    5.67    1.64   0 0.99450-0.91474-0.02980 0.07892 0.11559 0.37830
   1   3   8    4.84    1.20   0 0.99519-0.91506-0.04191 0.18508 0.10226 0.33815
   1   4   8    7.05    1.62   0 0.99427-0.91413-0.02667 0.21792 0.11902 0.32085
   1   5   7   56.84    1.85   0 0.99474-0.91575-0.03341 0.27174 0.11162 0.27282
   1   6  -2   10.45    2.10   0 0.99466-0.92350-0.03206 0.31653 0.11311-0.22205
   1   6   6   17.17    1.65   0 0.99469-0.91646-0.03263 0.31780 0.11247 0.21711
   1   7   0  211.82    3.07   0 0.99511-0.92118-0.04015 0.37192 0.10420-0.10387
   1   7   3    2.01    1.17   0 0.99537-0.91891-0.04660 0.37803 0.09709 0.06855
   1   7   4    3.04    1.08   0 0.99498-0.91755-0.03751 0.36858 0.10710 0.11369
   2 -12   1   51.53    1.64   0 0.99528-0.85730-0.04396-0.52078 0.10000-0.04355
   2 -12   2    3.74    1.13   0 0.99519-0.85580-0.04191-0.52340 0.10226 0.00916
   2 -11  -2    9.67    1.32   0 0.99510-0.85999-0.03986-0.47785 0.10452-0.21194
   2 -10  -3  142.48    2.42   0 0.99428-0.85939-0.02673-0.44357 0.11895-0.28150
   2 -10   7   15.60    3.29   0 0.98578-0.84025 0.03298-0.50276 0.18389 0.20304
   2  -8  -5   22.30    1.64   0 0.99425-0.86073-0.02638-0.34971 0.11934-0.39189
   2  -7  -6   39.68    1.39   0 0.99496-0.86203-0.03722-0.29171 0.10742-0.43485
   2  -7  10    9.57    2.20   0 0.99389-0.84506-0.02201-0.30583 0.12413 0.42759
   2  -5  -7   -0.14    1.03   0 0.99513-0.86280-0.04045-0.19697 0.10387-0.48400
   2  -5  11   17.15    1.84   0 0.99384-0.84331-0.02141-0.21205 0.12478 0.48118
   2  -4  -7    0.25    1.49   0 0.99430-0.86074-0.02696-0.16116 0.11870-0.50060
   2  -4  11   -0.67    1.52   0 0.99489-0.84460-0.03590-0.15074 0.10888 0.50023
   2   2  11   15.19    1.38   0 0.99523-0.84202-0.04279 0.13916 0.10129 0.50424
   2   3  -7   36.36    2.25   0 0.99459-0.85814-0.03102 0.17332 0.11424-0.49605
   2   3  11    1.36    1.66   0 0.99474-0.84044-0.03341 0.17625 0.11162 0.49505
   2   5  10    5.90    1.16   0 0.99504-0.84161-0.03869 0.27646 0.10581 0.44495
   2   7   9   11.49    1.65   0 0.99450-0.84130-0.02972 0.36238 0.11567 0.38012
   2   8  -4   28.63    2.55   0 0.99376-0.85298-0.02051 0.39931 0.12577-0.34298
   2   8   8   50.64    1.82   0 0.99455-0.84237-0.03053 0.41055 0.11478 0.32624
   2   9   6  181.42    2.16   0 0.99527-0.84382-0.04367 0.47045 0.10032 0.23082
   2   9   7    2.93    1.57   0 0.99423-0.84227-0.02608 0.45286 0.11967 0.26704
   2  10  -1  262.49    3.49   0 0.99398-0.84922-0.02309 0.49618 0.12294-0.17597
   2  10   0   19.27    1.38   0 0.99514-0.84946-0.04074 0.51380 0.10355-0.10161
   2  10   3  269.85    2.68   0 0.99533-0.84665-0.04543 0.51899 0.09838 0.06811
   2  10   4   40.72    1.48   0 0.99503-0.84502-0.03839 0.51205 0.10613 0.11517
   2  10   5  304.10    3.00   0 0.99435-0.84365-0.02763 0.50163 0.11796 0.15817
   3 -14   0  109.61    2.15   0 0.99524-0.78807-0.04308-0.61612 0.10097-0.09765
   3 -14   1    4.70    1.74   0 0.99484-0.78570-0.03507-0.62366 0.10979-0.05141
   3 -14   2   16.70    1.79   0 0.99465-0.78440-0.03198-0.62620 0.11319 0.00048
   3 -14   3   17.78    1.85   0 0.99486-0.78338-0.03544-0.62333 0.10938 0.05874
   3 -13  -3   14.34    1.34   0 0.99531-0.79062-0.04484-0.56680 0.09903-0.26084
   3 -13  -2   71.28    2.21   0 0.99437-0.78889-0.02789-0.58399 0.11768-0.22385
   3 -13   6    3.38    2.10   0 0.99370-0.77975-0.01987-0.59200 0.12648 0.20617
   3 -12  -4    2.20    1.65   0 0.99461-0.78963-0.03138-0.53267 0.11385-0.32968
   3 -11  -5    3.05    1.63   0 0.99440-0.79084-0.02830-0.49039 0.11723-0.38888
   3 -10  -6   20.76    1.66   0 0.99441-0.79171-0.02844-0.44206 0.11708-0.44256
   3  -9  -7   75.50    1.89   0 0.99475-0.79103-0.03348-0.38923 0.11154-0.49148
   3  -9  11    6.94    2.40   0 0.99338-0.77332-0.01656-0.40559 0.13010 0.47796
   3  -7  -8    1.90    1.53   0 0.99456-0.79213-0.03065-0.29851 0.11465-0.55021
   3  -7  12   -0.68    1.83   0 0.99469-0.77331-0.03253-0.29405 0.11258 0.55061
   3  -5  -9    3.84    1.22   0 0.99517-0.79375-0.04132-0.19335 0.10291-0.59310
   3  -4  -9   35.83    1.91   0 0.99453-0.79225-0.03022-0.15755 0.11512-0.60542
   3  -4  13   32.23    2.11   0 0.99472-0.77133-0.03309-0.15324 0.11197 0.60507
   3   1  13    3.46    1.23   0 0.99529-0.76888-0.04425 0.09288 0.09968 0.61782
   3   2  13   12.10    1.62   0 0.99497-0.76893-0.03729 0.13394 0.10735 0.60998
   3   3  -9   11.29    1.79   0 0.99481-0.78916-0.03449 0.17710 0.11043-0.60018
   3   3  13   -1.07    1.74   0 0.99452-0.76775-0.03004 0.17491 0.11532 0.60089
   3   5  12    1.12    1.15   0 0.99514-0.76822-0.04074 0.27863 0.10355 0.55970
   3   6  12   11.51    1.71   0 0.99427-0.76737-0.02666 0.31233 0.11903 0.54293
   3   7  11   17.30    1.32   0 0.99507-0.76855-0.03927 0.37215 0.10517 0.50241
   3   8  10    4.88    1.27   0 0.99538-0.76969-0.04689 0.42627 0.09677 0.45616
   3   9  10    0.72    1.50   0 0.99427-0.76784-0.02666 0.45298 0.11903 0.43336
   3  10   8   10.81    1.26   0 0.99535-0.77120-0.04601 0.51960 0.09774 0.34554
   3  10   9   -1.61    1.56   0 0.99457-0.76764-0.03077 0.50000 0.11452 0.37977
   3  11   7    5.86    1.21   0 0.99498-0.77073-0.03751 0.55878 0.10710 0.28134
   3  12  -1    5.96    1.69   0 0.99486-0.77891-0.03530 0.60353 0.10953-0.16054
   3  12   4    0.11    1.25   0 0.99528-0.77468-0.04396 0.61149 0.10000 0.12235
   3  12   5   26.90    1.82   0 0.99472-0.77340-0.03299 0.60181 0.11207 0.16632
   4 -15  -2    6.15    1.70   0 0.99469-0.71726-0.03252-0.67189 0.11260-0.21737
   4 -14  -4    1.78    1.80   0 0.99461-0.71897-0.03139-0.62537 0.11383-0.32800
   4 -13  -6   17.52    1.32   0 0.99541-0.72300-0.04777-0.56386 0.09580-0.42043
   4 -13   9    0.62    3.04   0 0.98978-0.70280 0.01123-0.62326 0.16037 0.33957
   4 -12  -7   -2.00    1.20   0 0.99538-0.72360-0.04689-0.51951 0.09677-0.47418
   4 -10  -8   10.30    1.68   0 0.99447-0.72295-0.02931-0.44122 0.11613-0.54959
   4  -9  -9    7.35    1.27   0 0.99518-0.72409-0.04162-0.38154 0.10258-0.59153
   4  -7 -10    0.50    1.17   0 0.99529-0.72489-0.04425-0.28701 0.09968-0.64197
   4  -6 -10    1.69    1.65   0 0.99455-0.72287-0.03048-0.25107 0.11483-0.65904
   4  -3 -11    0.67    1.27   0 0.99534-0.72386-0.04572-0.09413 0.09806-0.69725
   4  -2 -11    5.30    1.36   0 0.99517-0.72360-0.04132-0.05171 0.10291-0.70164
   4  -1 -11   24.50    1.49   0 0.99507-0.72295-0.03927-0.00682 0.10517-0.70381
   4   0 -11    1.13    1.24   0 0.99513-0.72245-0.04045 0.04227 0.10387-0.70262
   4   1 -11   24.66    1.53   0 0.99533-0.72281-0.04543 0.09334 0.09838-0.69675
   4   4  14    6.64    1.66   0 0.99500-0.69555-0.03781 0.22850 0.10678 0.66686
   4   6  13    5.38    1.40   0 0.99535-0.69629-0.04601 0.33066 0.09774 0.62181
   4   7  -9    3.53    2.04   0 0.99410-0.71669-0.02446 0.35472 0.12145-0.60961
   4   7  13    6.53    1.76   0 0.99453-0.69602-0.03019 0.36326 0.11516 0.60376
   4   8  12   -1.85    1.22   0 0.99525-0.69681-0.04337 0.42401 0.10064 0.56214
   4  10  11    1.57    1.85   0 0.99447-0.69601-0.02931 0.50436 0.11613 0.49338
   4  11  10    3.59    1.87   0 0.99452-0.69664-0.02997 0.55212 0.11540 0.43923
   4  12  -5    3.77    2.07   0 0.99281-0.71044-0.01115 0.57908 0.13601-0.40399
   4  12   8    1.60    1.16   0 0.99532-0.69871-0.04513 0.61363 0.09871 0.34629
   4  12   9    1.42    1.57   0 0.99420-0.69695-0.02579 0.59510 0.11999 0.37972
   4  13  -3    0.31    1.70   0 0.99487-0.70925-0.03546 0.65129 0.10936-0.26812
   4  13   6   80.78    1.87   0 0.99537-0.70134-0.04660 0.66206 0.09709 0.23777
   4  13   7   -0.94    1.67   0 0.99463-0.70000-0.03165 0.64847 0.11355 0.27474
   4  14  -1    7.00    1.74   0 0.99376-0.70669-0.02050 0.68291 0.12578-0.17523
   4  14   0    0.95    1.81   0 0.99460-0.70602-0.03124 0.69607 0.11400-0.10836
   4  14   1   44.05    1.65   0 0.99508-0.70608-0.03957 0.70185 0.10484-0.04420
   4  14   2    1.01    1.21   0 0.99517-0.70400-0.04132 0.70422 0.10291 0.01293
   4  14   3   87.16    1.92   0 0.99503-0.70380-0.03839 0.70074 0.10613 0.06420
   4  14   4   -1.16    1.79   0 0.99464-0.70263-0.03180 0.69548 0.11339 0.10993
   4  14   5   14.72    1.77   0 0.99411-0.70102-0.02463 0.68685 0.12126 0.15877
   5 -16  -3    2.21    1.78   0 0.99457-0.64807-0.03077-0.72058 0.11452-0.27304
   5 -15  -5    2.08    1.66   0 0.99475-0.65040-0.03348-0.66998 0.11154-0.37945
   5 -14  -6    6.17    1.78   0 0.99434-0.65025-0.02757-0.63179 0.11804-0.44155
   5 -13  -7    0.12    1.56   0 0.99435-0.65212-0.02769-0.58858 0.11790-0.49616
   5 -12  -8    0.38    1.67   0 0.99430-0.65182-0.02696-0.53747 0.11870-0.55217
   5 -11  -9    1.49    1.83   0 0.99464-0.65215-0.03179-0.48371 0.11340-0.59993
   5 -10 -10    8.45    1.37   0 0.99534-0.65490-0.04572-0.42473 0.09806-0.64055
   5  -9 -10   -2.00    1.73   0 0.99446-0.65414-0.02916-0.39717 0.11629-0.65882
   5  -8 -11   -2.33    1.26   0 0.99538-0.65547-0.04689-0.33140 0.09677-0.69306
   5  -7 -11    1.80    1.64   0 0.99458-0.65281-0.03087-0.29685 0.11441-0.71097
   5  -4 -12    0.57    1.34   0 0.99518-0.65481-0.04162-0.14792 0.10258-0.75396
   5  -3 -12    3.30    1.83   0 0.99464-0.65206-0.03185-0.10710 0.11333-0.76298
   5  -2 -12   -0.00    1.78   0 0.99455-0.65326-0.03048-0.06472 0.11484-0.76647
   5  -1 -12    2.97    1.72   0 0.99439-0.65181-0.02827-0.01677 0.11726-0.76992
   5   0 -12    2.99    1.69   0 0.99446-0.65171-0.02922 0.03145 0.11623-0.76917
   5   1 -12    2.57    1.74   0 0.99457-0.65061-0.03077 0.07950 0.11452-0.76621
   5   2 -12    0.54    1.64   0 0.99472-0.65081-0.03301 0.12880 0.11206-0.75883
   5  14  -4    1.53    1.75   0 0.99476-0.63889-0.03369 0.69772 0.11131-0.32390
   5  14   7    1.92    1.39   0 0.99539-0.62809-0.04718 0.71056 0.09644 0.29508
   5  15  -2   10.04    2.00   0 0.99424-0.63654-0.02620 0.73689 0.11954-0.22154
   5  15   5    6.27    1.39   0 0.99503-0.63003-0.03839 0.74884 0.10613 0.17588
   6  -7 -12    0.20    1.79   0 0.99447-0.58313-0.02931-0.29865 0.11613-0.76789
   6  -4 -13    0.59    1.38   0 0.99514-0.58478-0.04074-0.14843 0.10355-0.80885
   6  -3 -13   -1.72    1.82   0 0.99471-0.58338-0.03282-0.10891 0.11226-0.81593
   6  -2 -13   -0.14    1.89   0 0.99455-0.58326-0.03048-0.06430 0.11484-0.82051
   6  -1 -13    2.14    1.89   0 0.99441-0.58186-0.02847-0.01609 0.11705-0.82356
   6   0 -13    0.07    1.90   0 0.99449-0.58256-0.02960 0.02940 0.11581-0.82241
   6   1 -13   -0.01    1.84   0 0.99455-0.58095-0.03048 0.08029 0.11484-0.81977
   6   2 -13    0.65    1.63   0 0.99498-0.58161-0.03761 0.13465 0.10699-0.81170
   6   8 -11    0.05    2.04   0 0.99380-0.57660-0.02099 0.39828 0.12524-0.72078
   6  11  -9   -0.05    3.00   0 0.97702-0.55743 0.06844 0.45055 0.22190-0.70405
   0  -1   5   10.32    2.03   0 0.99234-0.98813-0.00718-0.03913 0.14032 0.13268
   0   0   5    0.09    1.70   0 0.99239-0.98803-0.00762 0.00798 0.13984 0.13575
   0   1   5   12.81    1.99   0 0.99215-0.98698-0.00557 0.05359 0.14208 0.13103
   0   2   1 1334.80    9.52   0 0.99305-0.99114-0.01349 0.10958 0.13343-0.07968
   0   2   3    3.15    1.73   0 0.99398-0.99027-0.02317 0.11866 0.12282 0.04038
   0   2   4  219.96    3.30   0 0.99280-0.98833-0.01118 0.10736 0.13595 0.08217
   1  -8   0   75.09    2.31   0 0.99240-0.92451-0.00769-0.36801 0.13976-0.14009
   1  -7  -2  216.18    2.59   0 0.99367-0.92773-0.01965-0.30910 0.12668-0.23656
   1  -6  -3   31.63    1.47   0 0.99383-0.92840-0.02141-0.26004 0.12475-0.28926
   1  -4  -4    5.51    1.25   0 0.99321-0.92795-0.01495-0.17266 0.13182-0.35077
   1  -4   9  147.89    3.07   0 0.99170-0.91401-0.00205-0.18478 0.14593 0.34816
   1   2   9    7.15    1.23   0 0.99390-0.91338-0.02229 0.11846 0.12378 0.37096
   1   3   9   -0.58    1.66   0 0.99267-0.91288-0.00997 0.15348 0.13728 0.35906
   1   5   8    9.29    1.64   0 0.99274-0.91225-0.01060 0.24866 0.13659 0.30380
   1   6   7  169.50    2.14   0 0.99318-0.91304-0.01466 0.30002 0.13214 0.25223
   1   7  -1  803.35    6.26   0 0.99288-0.92009-0.01187 0.34395 0.13520-0.18944
   1   7   5   57.25    1.58   0 0.99415-0.91539-0.02522 0.35754 0.12056 0.15429
   1   7   6  141.16    2.29   0 0.99259-0.91386-0.00929 0.34167 0.13802 0.19168
   1   8   1   96.65    2.41   0 0.99218-0.91717-0.00587 0.38505 0.14175-0.08588
   1   8   2  140.47    2.53   0 0.99299-0.91679-0.01289 0.39204 0.13407-0.02393
   1   8   3  488.78    3.68   0 0.99292-0.91590-0.01222 0.39149 0.13481 0.03018
   1   8   4  215.43    2.65   0 0.99233-0.91433-0.00705 0.38623 0.14046 0.07986
   2 -11  -1    2.78    1.13   0 0.99390-0.85767-0.02229-0.49493 0.12378-0.17743
   2 -11   0   10.01    1.71   0 0.99229-0.85481-0.00674-0.51071 0.14080-0.13958
   2 -11   5   38.77    2.32   0 0.99202-0.84944-0.00456-0.51322 0.14318 0.13215
   2 -10  -2    1.86    1.60   0 0.99232-0.85734-0.00702-0.46556 0.14050-0.24921
   2  -9  -4   98.03    1.75   0 0.99398-0.86007-0.02317-0.40000 0.12282-0.34085
   2  -7  -5   54.63    1.81   0 0.99175-0.85780-0.00243-0.32596 0.14551-0.41851
   2  -6  -6    4.85    1.10   0 0.99350-0.85998-0.01789-0.26385 0.12861-0.45647
   2  -3  -7   36.03    1.41   0 0.99336-0.85980-0.01642-0.12381 0.13021-0.51248
   2  -3  12    0.19    1.53   0 0.99189-0.83895-0.00351-0.13418 0.14433 0.51381
   2  -2  -7   24.36    1.78   0 0.99232-0.85818-0.00703-0.08550 0.14048-0.52263
   2  -2  12    2.98    1.59   0 0.99248-0.83959-0.00831-0.08461 0.13909 0.52240
   2  -1  12    5.18    1.70   0 0.99297-0.84044-0.01270-0.03255 0.13428 0.52613
   2   0  12    1.67    1.46   0 0.99275-0.83969-0.01070 0.01235 0.13648 0.52765
   2   1  -7   61.11    2.17   0 0.99160-0.85619-0.00128 0.05011 0.14676-0.52868
   2   1  12    2.45    1.66   0 0.99279-0.83866-0.01102 0.05964 0.13613 0.52560
   2   2  -7   23.14    2.03   0 0.99262-0.85635-0.00960 0.10544 0.13768-0.51917
   2   2  12    4.46    1.71   0 0.99223-0.83768-0.00625 0.10265 0.14134 0.52017
   2   4  11    1.72    1.13   0 0.99390-0.83929-0.02229 0.21238 0.12378 0.48277
   2   5  -6   13.40    2.35   0 0.99106-0.85294 0.00264 0.23472 0.15104-0.47770
   2   5  11   16.84    1.66   0 0.99247-0.83893-0.00831 0.24638 0.13909 0.46706
   2   6  10    1.49    1.15   0 0.99390-0.83976-0.02229 0.30701 0.12378 0.42847
   2   7  10    8.71    1.62   0 0.99207-0.83816-0.00498 0.33759 0.14272 0.40843
   2   8   9   43.35    1.85   0 0.99251-0.83980-0.00857 0.38844 0.13881 0.35772
   2   9  -3  161.28    3.49   0 0.99257-0.85031-0.00914 0.43535 0.13819-0.30018
   2   9   8   12.66    1.70   0 0.99236-0.84024-0.00733 0.43390 0.14016 0.30149
   2  10   6   45.29    1.51   0 0.99324-0.84159-0.01525 0.48899 0.13150 0.20009
   2  11   1   24.68    1.83   0 0.99182-0.84494-0.00302 0.52322 0.14486-0.08708
   2  11   2   32.29    1.86   0 0.99238-0.84464-0.00753 0.52849 0.13994-0.02705
   2  11   3   44.95    1.94   0 0.99238-0.84375-0.00755 0.52841 0.13992 0.02735
   2  11   4    5.41    1.76   0 0.99189-0.84172-0.00351 0.52509 0.14433 0.07898
   3 -13  -1  133.40    2.56   0 0.99275-0.78502-0.01070-0.60096 0.13648-0.18788
   3 -12  -3   28.52    1.91   0 0.99260-0.78662-0.00939-0.55430 0.13791-0.29892
   3 -11  -4    3.20    1.48   0 0.99189-0.78751-0.00354-0.51550 0.14430-0.36168
   3  -9  -6    1.08    1.50   0 0.99196-0.78843-0.00410-0.41973 0.14369-0.46990
   3  -8  -7   30.38    1.30   0 0.99318-0.79089-0.01466-0.36136 0.13214-0.51285
   3  -6  -8   11.07    1.16   0 0.99318-0.79110-0.01466-0.26714 0.13214-0.56763
   3  -6  13    0.10    1.82   0 0.99009-0.76721 0.00912-0.29048 0.15808 0.56074
   3  -5  13    3.83    1.61   0 0.99336-0.77003-0.01642-0.21798 0.13022 0.58768
   3  -3  -9   11.54    1.30   0 0.99383-0.79127-0.02141-0.11900 0.12475-0.61518
   3  -2  -9    4.26    1.27   0 0.99318-0.78998-0.01466-0.07831 0.13214-0.62299
   3  -2  14    3.84    1.58   0 0.99153-0.76586-0.00077-0.09098 0.14732 0.62347
   3  -1  -9   20.32    1.82   0 0.99245-0.78823-0.00810-0.03761 0.13932-0.62862
   3  -1  14    3.09    1.76   0 0.99189-0.76620-0.00351-0.04100 0.14433 0.62780
   3   0  -9   18.15    1.81   0 0.99241-0.78865-0.00772 0.00928 0.13973-0.62864
   3   0  14    0.84    1.81   0 0.99239-0.76455-0.00762 0.00948 0.13984 0.63062
   3   1  -9   21.92    1.81   0 0.99272-0.78797-0.01040 0.05890 0.13680-0.62618
   3   1  14    4.36    1.86   0 0.99181-0.76456-0.00293 0.05281 0.14497 0.62815
   3   2  -9    3.49    1.27   0 0.99377-0.78984-0.02082 0.11609 0.12539-0.61487
   3   4  13   28.45    1.53   0 0.99367-0.76713-0.01965 0.21068 0.12668 0.59020
   3   5  -8  118.33    3.22   0 0.99123-0.78449 0.00141 0.23553 0.14970-0.58475
   3   5  13    5.89    1.81   0 0.99245-0.76501-0.00811 0.24665 0.13931 0.57888
   3   7  12    0.91    1.63   0 0.99273-0.76544-0.01054 0.34335 0.13665 0.52701
   3   8  11   41.42    1.54   0 0.99377-0.76749-0.02082 0.40077 0.12539 0.48208
   3   9  11    6.76    1.59   0 0.99166-0.76508-0.00175 0.42874 0.14625 0.46172
   3  10  -5   18.12    2.65   0 0.99033-0.77885 0.00756 0.46601 0.15639-0.42616
   3  10  10    0.96    1.66   0 0.99196-0.76559-0.00410 0.47872 0.14369 0.40971
   3  11   8   25.64    1.38   0 0.99372-0.76910-0.02023 0.54114 0.12604 0.31701
   3  12  -2    0.93    1.67   0 0.99293-0.77741-0.01231 0.58063 0.13471-0.23971
   3  12   6    0.04    1.22   0 0.99390-0.77125-0.02229 0.59056 0.12378 0.20858
   3  12   7   42.47    1.94   0 0.99245-0.76927-0.00811 0.57664 0.13931 0.24887
   3  13   1   11.34    1.81   0 0.99241-0.77420-0.00774 0.62326 0.13971-0.08001
   3  13   2    2.30    1.75   0 0.99262-0.77370-0.00958 0.62734 0.13770-0.02300
   3  13   3   83.62    2.24   0 0.99286-0.77266-0.01166 0.62699 0.13542 0.03341
   3  13   4    8.56    1.77   0 0.99239-0.77091-0.00760 0.62336 0.13986 0.08416
   4 -15  -1   34.24    1.49   0 0.99390-0.71734-0.02229-0.68363 0.12378-0.17410
   4 -15   0   17.32    1.81   0 0.99266-0.71409-0.00990-0.69557 0.13735-0.13206
   4 -15   1   39.46    2.11   0 0.99182-0.71298-0.00302-0.70311 0.14486-0.08537
   4 -15   3    1.71    1.55   0 0.99104-0.71001 0.00279-0.70909 0.15120 0.01770
   4 -15   4   10.57    1.81   0 0.99170-0.70965-0.00206-0.70414 0.14592 0.07826
   4 -15   5   13.13    1.83   0 0.99301-0.70955-0.01305-0.69199 0.13391 0.14583
   4 -14  -3   38.51    1.68   0 0.99324-0.71806-0.01525-0.64376 0.13150-0.29139
   4 -13  -5   10.89    1.27   0 0.99410-0.72106-0.02463-0.58662 0.12121-0.39109
   4 -13  -4    2.75    1.59   0 0.99170-0.71676-0.00205-0.61002 0.14593-0.36130
   4 -12  -6    1.44    1.14   0 0.99377-0.72050-0.02082-0.54379 0.12539-0.45084
   4 -11  -7    5.64    1.28   0 0.99393-0.72170-0.02258-0.49447 0.12346-0.50354
   4  -9  -8   13.72    1.71   0 0.99239-0.71986-0.00762-0.41496 0.13984-0.57387
   4  -8  -9   21.50    1.34   0 0.99405-0.72342-0.02405-0.35173 0.12185-0.61068
   4  -7  -9    5.82    1.52   0 0.99228-0.71957-0.00664-0.32324 0.14092-0.63069
   4  -5 -10    4.06    1.20   0 0.99356-0.72148-0.01847-0.21578 0.12796-0.67283
   4  -4 -10   29.55    1.84   0 0.99232-0.72053-0.00703-0.18034 0.14048-0.68404
   4   4 -10   29.47    2.11   0 0.99293-0.71761-0.01237 0.20171 0.13465-0.67734
   4   9  12    6.27    1.38   0 0.99408-0.69510-0.02434 0.45098 0.12153 0.54339
   4  11  11    7.26    1.91   0 0.99234-0.69481-0.00717 0.52924 0.14034 0.46903
   4  12  10    6.97    1.86   0 0.99218-0.69404-0.00586 0.57606 0.14176 0.41257
   4  13   8    9.68    1.30   0 0.99339-0.69711-0.01671 0.63250 0.12989 0.31525
   4  14  -2    0.10    1.52   0 0.99126-0.70423 0.00118 0.66203 0.14944-0.25332
   4  14   6    0.40    1.63   0 0.99278-0.69901-0.01099 0.67799 0.13615 0.19842
   4  14   7    3.58    1.67   0 0.99175-0.69574-0.00248 0.66555 0.14545 0.24443
   5 -16  -2    1.59    1.32   0 0.99350-0.64678-0.01789-0.73499 0.12861-0.23356
   5 -16  -1   28.67    2.13   0 0.99201-0.64457-0.00449-0.74849 0.14326-0.19082
   5 -15  -4    5.33    1.38   0 0.99330-0.64845-0.01583-0.69005 0.13086-0.34454
   5 -14  -5    2.31    1.75   0 0.99204-0.64745-0.00469-0.65394 0.14304-0.41203
   5 -11  -8    5.80    1.66   0 0.99192-0.64985-0.00381-0.51344 0.14401-0.57719
   5 -10  -9    3.97    1.55   0 0.99269-0.65040-0.01020-0.45710 0.13702-0.62255
   5  -8 -10   11.95    1.69   0 0.99239-0.64971-0.00763-0.36697 0.13983-0.68047
   5  -6 -11    1.17    1.22   0 0.99364-0.65211-0.01935-0.26154 0.12700-0.72530
   5  -5 -11    9.29    1.77   0 0.99233-0.65097-0.00707-0.22774 0.14044-0.73752
   5   5 -11    7.85    1.78   0 0.99312-0.64749-0.01410 0.25066 0.13275-0.72904
   5  13  -6   -0.01    2.16   0 0.98796-0.63507 0.02171 0.59658 0.17175-0.49509
   5  15  -3    7.05    2.10   0 0.99154-0.63440-0.00090 0.71042 0.14718-0.30315
   5  16   0   12.16    1.91   0 0.99165-0.63147-0.00169 0.75988 0.14631-0.13761
   5  16   1   10.84    2.00   0 0.99264-0.63126-0.00973 0.76792 0.13754-0.07432
   5  16   2    2.33    1.79   0 0.99280-0.63040-0.01112 0.77122 0.13601-0.01861
   6 -10 -10   -3.19    1.80   0 0.99229-0.58102-0.00674-0.46575 0.14080-0.68144
   6  -9 -11    0.86    1.26   0 0.99390-0.58254-0.02229-0.39973 0.12378-0.72105
   6  -8 -11   -1.44    1.68   0 0.99227-0.58131-0.00659-0.37173 0.14096-0.73685
   6  -6 -12    0.77    1.31   0 0.99341-0.58191-0.01701-0.26338 0.12957-0.78156
   6  -5 -12   -0.61    1.83   0 0.99211-0.58007-0.00527-0.22829 0.14240-0.79375
   6   5 -12   -0.53    1.86   0 0.99270-0.57716-0.01026 0.24611 0.13696-0.78711
   0  -3   4   33.04    2.81   0 0.98908-0.98664 0.01531-0.15524 0.16483 0.05294
   0  -2   5   25.27    2.31   0 0.99034-0.98669 0.00748-0.10036 0.15632 0.11641
   0  -1   6    2.25    1.83   0 0.98820-0.98272 0.02038-0.06743 0.17033 0.15784
   0   0   6   20.09    2.04   0 0.98908-0.98346 0.01531-0.01399 0.16483 0.16347
   0   1   6    1.57    1.83   0 0.98885-0.98279 0.01668 0.03158 0.16632 0.16283
   0   2   5   24.75    1.49   0 0.99088-0.98527 0.00378 0.09223 0.15229 0.12075
   0   3   1 1460.13    9.00   0 0.98871-0.98631 0.01747 0.12568 0.16718-0.11326
   0   3   2  133.62    2.88   0 0.99149-0.98813-0.00062 0.14361 0.14749-0.03881
   0   3   3  784.03    5.27   0 0.99172-0.98745-0.00238 0.14541 0.14557 0.01795
   0   3   4   33.00    1.64   0 0.99084-0.98559 0.00407 0.13887 0.15261 0.06574
   0   3   5    4.89    1.78   0 0.98890-0.98297 0.01639 0.12669 0.16600 0.10717
   0   4   3    6.20    1.99   0 0.98839-0.98376 0.01932 0.17065 0.16918-0.00562
   1  -8   1   90.78    2.51   0 0.98979-0.92124 0.01097-0.38661 0.16011-0.10574
   1  -8   2  140.20    3.07   0 0.98738-0.91824 0.02481-0.40084 0.17513-0.06588
   1  -8   4  226.81    4.69   0 0.98529-0.91366 0.03518-0.41127 0.18634 0.03276
   1  -7  -1  809.38    5.08   0 0.99002-0.92325 0.00951-0.33773 0.15853-0.21391
   1  -7   7   77.27    4.90   0 0.98279-0.90780 0.04631-0.37485 0.19833 0.18615
   1  -6  -2    9.92    1.80   0 0.98911-0.92240 0.01512-0.29566 0.16462-0.27443
   1  -6   8  292.45    5.21   0 0.98804-0.91232 0.02123-0.30205 0.17125 0.26808
   1  -5  -3  709.18    4.45   0 0.99075-0.92514 0.00466-0.23859 0.15325-0.31828
   1  -3  -4   15.02    1.41   0 0.99101-0.92540 0.00290-0.14305 0.15133-0.37070
   1  -2  -4   18.93    2.06   0 0.98828-0.92211 0.01991-0.11264 0.16982-0.38902
   1  -2  10   14.23    1.68   0 0.98931-0.91020 0.01392-0.10659 0.16331 0.38580
   1  -1  10    0.47    1.09   0 0.99058-0.91012 0.00583-0.05193 0.15452 0.39565
   1   0  10   -0.22    1.17   0 0.99092-0.91024 0.00348-0.00143 0.15197 0.39774
   1   1  10    0.94    1.15   0 0.99067-0.90942 0.00524 0.04312 0.15388 0.39654
   1   2  10   18.29    1.67   0 0.98991-0.90874 0.01024 0.08597 0.15932 0.39056
   1   3  -4   14.31    2.35   0 0.98953-0.92091 0.01258 0.13060 0.16186-0.38050
   1   3  10   68.82    2.12   0 0.98876-0.90730 0.01722 0.12654 0.16690 0.38238
   1   4   9  154.66    2.15   0 0.99145-0.91053-0.00033 0.19084 0.14781 0.34657
   1   5   9   14.64    1.72   0 0.98941-0.90813 0.01336 0.22452 0.16271 0.33239
   1   6   8  296.90    2.64   0 0.99054-0.90967 0.00612 0.27880 0.15484 0.28471
   1   7   7   86.34    1.70   0 0.99054-0.91004 0.00612 0.32600 0.15484 0.22993
   1   8   0   77.73    2.38   0 0.98983-0.91551 0.01074 0.36818 0.15986-0.15871
   1   8   5    9.93    1.15   0 0.99117-0.91188 0.00172 0.37761 0.15005 0.12530
   1   8   6   -0.01    1.55   0 0.98924-0.91000 0.01434 0.36454 0.16377 0.16657
   1   9   3  117.81    2.28   0 0.98813-0.91045 0.02078 0.40565 0.17076-0.00536
   2 -11   1   22.58    1.42   0 0.99067-0.85300 0.00524-0.52267 0.15388-0.09833
   2 -11   2   32.92    1.89   0 0.98907-0.84993 0.01536-0.53280 0.16488-0.05380
   2 -11   3   45.87    2.14   0 0.98857-0.84873 0.01829-0.53592 0.16806-0.00225
   2 -11   4    3.97    1.72   0 0.98908-0.84775 0.01530-0.53276 0.16482 0.05601
   2 -10  -1  250.29    2.96   0 0.98866-0.85241 0.01778-0.48815 0.16751-0.22118
   2  -9  -3  164.53    2.17   0 0.99080-0.85621 0.00436-0.42733 0.15293-0.31662
   2  -8  -4   27.31    1.33   0 0.99071-0.85653 0.00495-0.38069 0.15357-0.37203
   2  -6  11    0.09    1.79   0 0.98953-0.84047 0.01258-0.29265 0.16186 0.44514
   2  -5  -6   13.12    1.16   0 0.99133-0.85752 0.00055-0.23506 0.14877-0.47683
   2  -4  -6   -0.48    1.51   0 0.98905-0.85543 0.01551-0.20472 0.16505-0.49427
   2  -4  12   21.27    1.85   0 0.98902-0.83739 0.01566-0.20232 0.16521 0.49531
   2  -1  -7   56.10    1.66   0 0.99153-0.85700-0.00092-0.04457 0.14717-0.52922
   2   0  -7    0.61    1.17   0 0.99125-0.85641 0.00114-0.00047 0.14941-0.53142
   2   3  12    0.33    1.23   0 0.99133-0.83666 0.00055 0.14392 0.14877 0.51168
   2   4  12   25.26    1.72   0 0.98996-0.83510 0.00988 0.18102 0.15893 0.50218
   2   5  12    0.44    1.58   0 0.98905-0.83180 0.01551 0.22049 0.16505 0.49164
   2   6  11    0.06    1.16   0 0.99075-0.83597 0.00466 0.28102 0.15325 0.45241
   2   7  11   63.46    2.02   0 0.98828-0.83336 0.01991 0.31309 0.16982 0.43599
   2   8  10   15.21    1.73   0 0.98947-0.83532 0.01295 0.36643 0.16227 0.38885
   2   9   9   30.16    1.83   0 0.98981-0.83541 0.01087 0.41598 0.16000 0.33636
   2  10  -2   -0.53    1.71   0 0.98949-0.84649 0.01287 0.45959 0.16218-0.27031
   2  10   7   14.33    1.30   0 0.99153-0.83851-0.00092 0.47472 0.14717 0.23990
   2  10   8   31.12    1.79   0 0.98904-0.83571 0.01555 0.45877 0.16509 0.27631
   2  11   0   11.46    1.75   0 0.99000-0.84369 0.00964 0.51061 0.15867-0.15570
   2  11   5   38.31    1.40   0 0.99097-0.83973 0.00319 0.51750 0.15165 0.12540
   2  11   6   55.88    1.89   0 0.98936-0.83779 0.01366 0.50725 0.16303 0.16860
   3 -13   0    4.14    1.28   0 0.99129-0.78435 0.00084-0.61280 0.14909-0.14688
   3 -13   1    8.88    1.76   0 0.98930-0.78014 0.01402-0.62560 0.16343-0.10590
   3 -13   2    0.79    1.66   0 0.98855-0.77963 0.01838-0.63159 0.16816-0.05553
   3 -13   3   80.73    2.40   0 0.98755-0.77723 0.02389-0.63581 0.17413-0.00643
   3 -13   4    8.83    1.76   0 0.98816-0.77684 0.02058-0.63280 0.17055 0.05197
   3 -13   5    4.01    1.72   0 0.98980-0.77695 0.01093-0.62224 0.16007 0.11717
   3 -12  -2   -0.39    1.68   0 0.98905-0.78223 0.01551-0.57484 0.16505-0.27027
   3 -10  -5   15.78    1.27   0 0.99145-0.78846-0.00033-0.46982 0.14781-0.41946
   3  -8  -6   -0.09    1.47   0 0.98823-0.78466 0.02020-0.39680 0.17013-0.49626
   3  -8  12    0.56    1.87   0 0.98965-0.76814 0.01185-0.38717 0.16108 0.50060
   3  -7  -7    2.97    1.08   0 0.99063-0.78756 0.00554-0.33507 0.15420-0.53588
   3  -5  -8  124.12    1.96   0 0.99129-0.78884 0.00084-0.23497 0.14909-0.58494
   3  -4  -8   37.53    1.95   0 0.98901-0.78585 0.01576-0.20294 0.16532-0.60065
   3  -4  14    2.31    1.91   0 0.98791-0.76293 0.02196-0.20843 0.17204 0.60018
   3  -3  14    3.66    1.66   0 0.99012-0.76465 0.00891-0.14920 0.15788 0.61454
   3   2  14    4.80    1.32   0 0.99129-0.76406 0.00084 0.09656 0.14909 0.62327
   3   3  14    2.62    1.40   0 0.99045-0.76250 0.00671 0.13744 0.15548 0.61726
   3   4  14    3.32    1.73   0 0.98918-0.76108 0.01474 0.17691 0.16421 0.60876
   3   6  13    0.45    1.29   0 0.99088-0.76324 0.00378 0.28299 0.15229 0.56430
   3   7  -7    0.27    2.26   0 0.98819-0.77998 0.02040 0.31245 0.17035-0.55169
   3   7  13   -0.36    1.72   0 0.98887-0.76063 0.01653 0.31725 0.16616 0.54946
   3   8  12    0.20    1.23   0 0.99067-0.76324 0.00524 0.37562 0.15388 0.50779
   3  10  11    0.27    1.80   0 0.98882-0.76137 0.01683 0.45782 0.16648 0.43939
   3  11  -4    1.79    1.76   0 0.98945-0.77644 0.01312 0.50773 0.16245-0.37712
   3  11   9   10.93    1.37   0 0.99165-0.76554-0.00180 0.52313 0.14621 0.35216
   3  11  10   39.48    2.02   0 0.98861-0.76235 0.01803 0.50389 0.16778 0.38485
   3  12  -3   35.54    2.43   0 0.98639-0.77217 0.02988 0.53773 0.18062-0.34070
   3  12   8   13.87    1.32   0 0.99050-0.76535 0.00642 0.56220 0.15516 0.28825
   3  13  -1  141.31    2.77   0 0.98813-0.77178 0.02077 0.59422 0.17075-0.22106
   3  13   0    4.18    1.30   0 0.99121-0.77287 0.00143 0.61401 0.14973-0.14499
   3  13   5    5.07    1.26   0 0.99153-0.76871-0.00092 0.61643 0.14717 0.13162
   3  13   6    4.45    1.33   0 0.99018-0.76613 0.00847 0.60753 0.15740 0.17658
   3  13   7   12.26    1.77   0 0.98824-0.76440 0.02016 0.59542 0.17009 0.21799
   4 -15   2    2.29    1.32   0 0.99113-0.71171 0.00202-0.70818 0.15037-0.03681
   4 -14  -2   -0.10    1.26   0 0.99113-0.71587 0.00202-0.66169 0.15037-0.25393
   4 -14  -1    9.08    1.71   0 0.98850-0.71180 0.01870-0.67776 0.16851-0.21897
   4 -14   7    1.69    2.13   0 0.98828-0.70309 0.01991-0.67824 0.16982 0.21841
   4 -13  -3   -1.52    1.66   0 0.98867-0.71445 0.01771-0.63204 0.16743-0.32622
   4 -12  -5    4.90    1.20   0 0.99075-0.71696 0.00466-0.56971 0.15325-0.42378
   4 -11  -6   23.53    1.34   0 0.99058-0.71820 0.00583-0.52291 0.15452-0.47941
   4 -10  -7    5.65    1.16   0 0.99121-0.71894 0.00143-0.47165 0.14973-0.52954
   4  -8  -8    8.85    1.60   0 0.98941-0.71638 0.01337-0.38884 0.16272-0.59657
   4  -6  -9   34.31    1.73   0 0.98995-0.71790 0.00996-0.29130 0.15902-0.64815
   4  -3 -10    5.62    1.22   0 0.99109-0.71866 0.00231-0.14213 0.15069-0.69483
   4  -2 -10    6.93    1.63   0 0.98973-0.71719 0.01134-0.10370 0.16052-0.70283
   4  -1 -10   -0.35    1.87   0 0.98905-0.71640 0.01551-0.06403 0.16505-0.70802
   4   0 -10   32.51    2.06   0 0.98854-0.71512 0.01844-0.01742 0.16823-0.71157
   4   1 -10    0.91    1.66   0 0.98905-0.71520 0.01551 0.03338 0.16505-0.71039
   4   2 -10    9.58    1.75   0 0.98920-0.71424 0.01458 0.08088 0.16404-0.70697
   4   3 -10    4.49    1.19   0 0.99105-0.71659 0.00260 0.13986 0.15101-0.69451
   4   6  -9   34.00    2.53   0 0.98723-0.71032 0.02559 0.25771 0.17597-0.66477
   4  13  -4    2.90    1.82   0 0.98960-0.70524 0.01219 0.60296 0.16144-0.37461
   4  13   9   -1.18    1.29   0 0.99141-0.69398-0.00004 0.61680 0.14813 0.34972
   4  14   8    1.84    1.87   0 0.98950-0.69250 0.01278 0.65226 0.16208 0.28375
   4  15   0   14.81    2.00   0 0.98868-0.69954 0.01764 0.69271 0.16736-0.16117
   4  15   1   42.50    1.98   0 0.99039-0.70053 0.00711 0.70275 0.15592-0.09439
   4  15   2    1.87    1.27   0 0.99113-0.69909 0.00202 0.70864 0.15037-0.03439
   4  15   3    1.76    1.32   0 0.99121-0.69814 0.00143 0.70920 0.14973 0.02114
   4  15   4    8.74    1.35   0 0.99080-0.69762 0.00436 0.70548 0.15293 0.07284
   4  15   5   10.64    1.80   0 0.98991-0.69544 0.01023 0.69999 0.15931 0.12247
   4  15   6    2.65    1.89   0 0.98844-0.69297 0.01903 0.69266 0.16886 0.16662
   5 -16   0   12.33    1.47   0 0.99050-0.64214 0.00642-0.75979 0.15516-0.14915
   5 -16   1   10.73    1.90   0 0.98896-0.64009 0.01605-0.76825 0.16563-0.10429
   5 -16   2    0.82    1.83   0 0.98796-0.63798 0.02167-0.77422 0.17172-0.05677
   5 -16   3    8.00    1.83   0 0.98767-0.63657 0.02325-0.77659 0.17344-0.00221
   5 -15  -3    6.23    1.34   0 0.99105-0.64615 0.00260-0.70794 0.15101-0.31091
   5 -15  -2   12.15    1.87   0 0.98822-0.64194 0.02025-0.72634 0.17018-0.27369
   5 -14  -4    0.10    1.74   0 0.98875-0.64383 0.01727-0.67589 0.16695-0.38118
   5 -13  -6   -0.86    1.15   0 0.99133-0.64858 0.00055-0.61347 0.14877-0.47032
   5 -12  -7   14.05    1.30   0 0.99133-0.64973 0.00055-0.56490 0.14877-0.52703
   5 -10  -8    4.74    1.62   0 0.98839-0.64593 0.01932-0.48917 0.16918-0.60272
   5  -9  -9    1.86    1.20   0 0.99041-0.64840 0.00700-0.42971 0.15580-0.64422
   5  -7 -10   -1.29    1.22   0 0.99058-0.64954 0.00583-0.33714 0.15452-0.69613
   5  -4 -11    2.00    1.27   0 0.99097-0.64896 0.00319-0.19008 0.15165-0.74981
   5  -3 -11   -0.79    1.65   0 0.98929-0.64725 0.01404-0.15636 0.16345-0.75883
   5  -2 -11    2.45    1.75   0 0.98841-0.64569 0.01921-0.11171 0.16906-0.76771
   5   3 -11   -0.59    1.79   0 0.98880-0.64460 0.01697 0.12413 0.16664-0.76464
   5   4 -11    1.00    1.54   0 0.99080-0.64542 0.00436 0.18661 0.15293-0.75039
   5   7 -10    0.77    1.69   0 0.98929-0.64169 0.01409 0.31873 0.16351-0.70594
   5   9  -9    0.81    2.19   0 0.98627-0.63694 0.03049 0.39691 0.18127-0.66827
   5  14  -5    0.23    2.05   0 0.98680-0.63153 0.02782 0.63622 0.17839-0.44557
   5  16  -1   31.44    2.31   0 0.98949-0.62986 0.01284 0.74542 0.16215-0.20891
   6 -14  -6   -0.16    1.88   0 0.98927-0.57568 0.01419-0.67258 0.16361-0.48313
   6 -13  -7    1.24    1.77   0 0.98900-0.57558 0.01580-0.62635 0.16536-0.54255
   6 -12  -8   -0.18    1.77   0 0.98929-0.57684 0.01404-0.57875 0.16345-0.59233
   6 -11  -9   -3.34    1.43   0 0.99067-0.57923 0.00524-0.52444 0.15388-0.63911
   6  -9 -10    8.49    1.75   0 0.98913-0.57688 0.01500-0.43621 0.16450-0.70445
   6  -7 -11   -1.24    1.53   0 0.98953-0.57851 0.01258-0.34175 0.16186-0.75354
   6  -4 -12    0.72    1.28   0 0.99084-0.57888 0.00407-0.19049 0.15261-0.80447
   6  -3 -12    3.60    1.82   0 0.98931-0.57668 0.01396-0.15287 0.16337-0.81382
   6  -2 -12   -1.27    1.78   0 0.98867-0.57684 0.01771-0.11292 0.16743-0.81999
   6   3 -12    1.39    1.94   0 0.98875-0.57389 0.01724 0.12715 0.16692-0.81813
   6   4 -12    0.86    1.72   0 0.98938-0.57431 0.01353 0.17661 0.16289-0.80812
   6   7 -11    0.66    1.71   0 0.98887-0.57170 0.01654 0.31762 0.16616-0.76404
   0  -3   5    5.53    2.04   0 0.98306-0.97993 0.04487-0.18497 0.19663 0.07633
   0  -2   6   14.56    1.96   0 0.98465-0.98033 0.03783-0.13047 0.18905 0.13838
   0   0   7    0.53    1.88   0 0.98445-0.97722 0.03878-0.03820 0.19007 0.19331
   0   1   0    0.92    1.73   0 0.98716-0.98669 0.02559 0.02486 0.17582-0.17590
   0   1   7  104.01    2.39   0 0.98443-0.97767 0.03887 0.00997 0.19017 0.19253
   0   2   6   15.90    1.36   0 0.98787-0.98145 0.02178 0.07428 0.17169 0.15600
   0   2   7   47.29    1.90   0 0.98366-0.97660 0.04227 0.05368 0.19383 0.18908
   0   3   6  103.43    1.92   0 0.98606-0.97920 0.03116 0.11222 0.18184 0.14617
   0   4   2  355.39    3.79   0 0.98727-0.98344 0.02501 0.16535 0.17519-0.06628
   0   4   4   66.23    1.80   0 0.98782-0.98215 0.02207 0.16832 0.17201 0.04631
   0   4   5   16.70    1.35   0 0.98618-0.97982 0.03057 0.15939 0.18121 0.09134
   0   4   6  224.21    2.73   0 0.98348-0.97630 0.04308 0.14728 0.19471 0.13335
   0   5   3   77.64    2.33   0 0.98386-0.97870 0.04139 0.19600 0.19288-0.02910
   0   5   4  149.30    2.54   0 0.98387-0.97785 0.04134 0.19612 0.19284 0.02583
   1  -8   3  515.78    5.57   0 0.98487-0.91445 0.03684-0.41293 0.18798-0.02393
   1  -7   0  213.50    3.32   0 0.98439-0.91674 0.03903-0.36758 0.19034-0.19110
   1  -5   9   13.54    1.85   0 0.98582-0.90905 0.03235-0.26612 0.18313 0.31119
   1  -4  -3  329.47    3.31   0 0.98588-0.91967 0.03204-0.21886 0.18279-0.34764
   1  -4  10    6.00    1.86   0 0.98141-0.90357 0.05170-0.23893 0.20398 0.34501
   1  -3  10   73.22    1.92   0 0.98688-0.90810 0.02706-0.16664 0.17741 0.37169
   1  -1  -4  928.16    6.06   0 0.98526-0.91833 0.03501-0.08019 0.18600-0.40509
   1  -1  11    5.10    1.48   0 0.98332-0.90233 0.04377-0.08913 0.19545 0.40767
   1   0  -4    0.17    2.02   0 0.98298-0.91590 0.04522-0.04501 0.19701-0.41546
   1   0  11    0.67    1.65   0 0.98412-0.90295 0.04024-0.03839 0.19165 0.41306
   1   1  11    6.87    1.81   0 0.98440-0.90267 0.03899 0.01030 0.19030 0.41441
   1   2  -4   17.57    2.43   0 0.98328-0.91511 0.04396 0.05206 0.19565-0.41421
   1   2  11    0.04    1.69   0 0.98392-0.90177 0.04112 0.05519 0.19259 0.41211
   1   4  10    6.89    1.23   0 0.98699-0.90540 0.02647 0.16466 0.17677 0.37246
   1   5  10   21.38    1.81   0 0.98473-0.90287 0.03750 0.20067 0.18869 0.36059
   1   6   9   40.92    1.47   0 0.98682-0.90504 0.02735 0.25797 0.17772 0.31663
   1   7  -2  223.03    4.13   0 0.98269-0.91033 0.04644 0.28521 0.19832-0.30689
   1   7   8  179.55    2.19   0 0.98744-0.90611 0.02413 0.30845 0.17423 0.26546
   1   7   9   69.88    1.98   0 0.98339-0.90150 0.04346 0.28886 0.19512 0.29975
   1   8  -1   65.50    2.40   0 0.98323-0.90959 0.04417 0.33469 0.19588-0.24952
   1   8   7   99.62    1.80   0 0.98688-0.90575 0.02706 0.35256 0.17741 0.20741
   1   8   8    8.84    1.68   0 0.98346-0.90235 0.04317 0.33563 0.19480 0.24497
   1   9   1   35.45    1.94   0 0.98526-0.90949 0.03502 0.39118 0.18601-0.13000
   1   9   2  215.64    2.51   0 0.98755-0.91038 0.02354 0.40268 0.17360-0.06286
   1   9   4   20.79    1.33   0 0.98766-0.90912 0.02295 0.40349 0.17296 0.04799
   1   9   5  264.26    2.57   0 0.98653-0.90710 0.02882 0.39780 0.17931 0.09597
   1   9   6   36.88    1.76   0 0.98458-0.90475 0.03816 0.38818 0.18941 0.14100
   2 -10   0   19.20    1.76   0 0.98439-0.84739 0.03905-0.50928 0.19037-0.18962
   2  -9  -2    0.31    1.09   0 0.98582-0.84993 0.03233-0.45656 0.18311-0.29133
   2  -8  -3    0.49    1.45   0 0.98483-0.84955 0.03702-0.41433 0.18817-0.35133
   2  -8  10   17.72    2.70   0 0.98047-0.83229 0.05542-0.43095 0.20797 0.34268
   2  -7  -4  134.52    2.20   0 0.98547-0.85067 0.03403-0.36248 0.18494-0.40314
   2  -6  -5   17.69    1.23   0 0.98798-0.85415 0.02120-0.30240 0.17106-0.44365
   2  -5  12    0.87    1.62   0 0.98448-0.83328 0.03862-0.27246 0.18990 0.47039
   2  -3  -6  188.97    2.59   0 0.98514-0.85014 0.03559-0.17534 0.18663-0.51400
   2  -2  13   20.46    2.00   0 0.98467-0.83224 0.03774-0.12948 0.18895 0.52624
   2  -1  13    9.39    1.31   0 0.98630-0.83312 0.02999-0.07476 0.18058 0.53449
   2   0  13    0.49    1.16   0 0.98694-0.83273 0.02676-0.02455 0.17709 0.53900
   2   1  13   10.19    1.33   0 0.98694-0.83298 0.02676 0.02260 0.17709 0.53814
   2   2  13   20.71    1.43   0 0.98647-0.83185 0.02911 0.06773 0.17963 0.53564
   2   3  13   16.27    1.87   0 0.98538-0.83046 0.03445 0.10999 0.18539 0.53040
   2   4  -6    0.41    2.05   0 0.98190-0.84423 0.04974 0.14039 0.20187-0.52927
   2   4  13   12.05    1.86   0 0.98397-0.82859 0.04094 0.15032 0.19240 0.52312
   2   6  12    7.15    1.23   0 0.98588-0.83087 0.03204 0.25357 0.18279 0.47753
   2   8  11   62.86    2.02   0 0.98506-0.83003 0.03597 0.34432 0.18705 0.41904
   2   9  10   17.38    1.36   0 0.98600-0.83125 0.03145 0.39523 0.18216 0.36953
   2  10   9   20.49    1.35   0 0.98576-0.83155 0.03262 0.44169 0.18343 0.31312
   2  11  -1    0.96    1.66   0 0.98558-0.83999 0.03350 0.48733 0.18438-0.23576
   2  11   7   73.83    1.69   0 0.98722-0.83417 0.02530 0.49607 0.17550 0.21124
   2  11   8    0.99    1.60   0 0.98451-0.83002 0.03848 0.48263 0.18975 0.25263
   2  12   1   55.64    1.97   0 0.98406-0.83618 0.04052 0.52742 0.19194-0.13393
   2  12   2    3.22    1.70   0 0.98600-0.83690 0.03145 0.53689 0.18216-0.06899
   2  12   3   17.89    1.40   0 0.98665-0.83677 0.02823 0.53993 0.17868-0.01106
   2  12   4   57.46    1.60   0 0.98642-0.83572 0.02940 0.53870 0.17994 0.04239
   2  12   5   14.76    1.78   0 0.98532-0.83409 0.03473 0.53395 0.18571 0.09159
   2  12   6    5.65    1.59   0 0.98381-0.83114 0.04162 0.52718 0.19313 0.13913
   3 -12  -1    5.75    1.38   0 0.98653-0.78003 0.02882-0.59387 0.17931-0.23171
   3 -12   7   45.70    2.91   0 0.97982-0.76493 0.05792-0.62225 0.21066 0.17614
   3 -11  -3  131.15    2.02   0 0.98771-0.78314 0.02266-0.54018 0.17264-0.33454
   3 -10  -4  108.65    1.85   0 0.98653-0.78242 0.02882-0.49906 0.17931-0.39610
   3  -9  -5    5.06    1.13   0 0.98676-0.78347 0.02764-0.45080 0.17804-0.44931
   3  -7  -6   21.01    1.60   0 0.98324-0.77952 0.04412-0.37300 0.19582-0.52235
   3  -7  13    0.52    1.80   0 0.98374-0.76198 0.04192-0.36936 0.19346 0.52284
   3  -6  -7   27.26    1.35   0 0.98710-0.78391 0.02589-0.30740 0.17614-0.55737
   3  -5  14    4.22    1.90   0 0.98392-0.76004 0.04115-0.27483 0.19262 0.57844
   3  -3  -8   57.23    1.59   0 0.98665-0.78298 0.02823-0.16834 0.17868-0.61444
   3  -2  -8    1.76    1.63   0 0.98430-0.78014 0.03945-0.13285 0.19079-0.62637
   3   0  15   -0.35    1.79   0 0.98464-0.75883 0.03790-0.03258 0.18912 0.63761
   3   3  -8   57.87    2.18   0 0.98217-0.77588 0.04864 0.09436 0.20069-0.63572
   3   4  -8   36.07    2.22   0 0.98574-0.77881 0.03273 0.15692 0.18354-0.61842
   3   5  14    2.94    1.41   0 0.98755-0.75920 0.02354 0.21553 0.17360 0.59895
   3   6  14   11.54    1.72   0 0.98533-0.75673 0.03468 0.25198 0.18565 0.58767
   3   8  13    1.18    1.25   0 0.98588-0.75728 0.03204 0.34876 0.18279 0.53533
   3   9  12    3.63    1.25   0 0.98771-0.75962 0.02266 0.40531 0.17264 0.49067
   3  10  12   22.30    1.95   0 0.98408-0.75580 0.04042 0.43457 0.19184 0.47137
   3  11  11    3.55    1.83   0 0.98456-0.75675 0.03826 0.48438 0.18951 0.41909
   3  12   9    3.39    1.25   0 0.98771-0.76106 0.02266 0.54659 0.17264 0.32611
   3  12  10    3.31    1.83   0 0.98406-0.75689 0.04053 0.52941 0.19196 0.36142
   3  13   8    2.23    1.59   0 0.98570-0.75966 0.03292 0.58363 0.18374 0.26032
   3  14   1    3.97    1.79   0 0.98467-0.76520 0.03774 0.62606 0.18895-0.12908
   3  14   2   16.20    1.40   0 0.98642-0.76659 0.02940 0.63291 0.17994-0.06550
   3  14   3   19.39    1.40   0 0.98694-0.76582 0.02676 0.63606 0.17709-0.00771
   3  14   4    1.90    1.36   0 0.98676-0.76401 0.02764 0.63558 0.17804 0.04651
   3  14   5    1.35    1.63   0 0.98588-0.76217 0.03204 0.63126 0.18279 0.09663
   3  14   6   18.14    1.85   0 0.98426-0.76019 0.03962 0.62394 0.19098 0.14337
   4 -14   0    0.07    1.65   0 0.98445-0.70567 0.03878-0.69358 0.19007-0.18598
   4 -14   1   41.40    1.99   0 0.98272-0.70388 0.04632-0.70541 0.19820-0.13938
   4 -14   6    1.55    2.01   0 0.98243-0.69925 0.04756-0.70615 0.19953 0.13260
   4 -13  -2   10.71    1.77   0 0.98407-0.70838 0.04049-0.65241 0.19191-0.29771
   4 -12  -4   66.82    1.68   0 0.98630-0.71253 0.02999-0.59469 0.18058-0.39574
   4 -11  -5   23.15    1.77   0 0.98523-0.71109 0.03517-0.55254 0.18618-0.45601
   4 -10  -6    3.88    1.17   0 0.98570-0.71276 0.03292-0.50278 0.18374-0.50870
   4  -9  -7   16.61    1.26   0 0.98722-0.71494 0.02530-0.44821 0.17550-0.55498
   4  -7  -8    1.41    1.16   0 0.98588-0.71305 0.03204-0.36100 0.18279-0.61768
   4  -5  -9    2.94    1.14   0 0.98722-0.71453 0.02530-0.25996 0.17550-0.66472
   4  -4  -9    0.04    1.64   0 0.98445-0.71139 0.03878-0.22626 0.19007-0.68006
   4   8  -8    8.68    2.42   0 0.97804-0.69868 0.06451 0.31368 0.21771-0.65117
   4  14  -3   43.29    2.20   0 0.98463-0.69922 0.03793 0.62461 0.18916-0.34686
   4  15  -1   38.16    2.19   0 0.98522-0.69765 0.03520 0.67424 0.18621-0.23443
   4  16   2   30.40    1.89   0 0.98300-0.69231 0.04514 0.71193 0.19692-0.08007
   4  16   3    1.41    1.80   0 0.98383-0.69050 0.04154 0.71693 0.19305-0.02208
   4  16   4   13.03    1.92   0 0.98370-0.68990 0.04211 0.71626 0.19366 0.03356
   4  16   5   -2.98    1.65   0 0.98373-0.68844 0.04200 0.71289 0.19354 0.08345
   5 -15  -1    4.26    1.80   0 0.98453-0.63706 0.03840-0.74221 0.18966-0.23985
   5 -14  -3    1.95    1.78   0 0.98448-0.63894 0.03862-0.69705 0.18990-0.34969
   5 -13  -5   18.38    1.42   0 0.98710-0.64340 0.02589-0.63723 0.17614-0.44501
   5 -12  -6    0.65    1.17   0 0.98653-0.64303 0.02882-0.59312 0.17931-0.50357
   5 -11  -7   -0.27    1.20   0 0.98694-0.64451 0.02676-0.54565 0.17709-0.55347
   5  -9  -8    1.03    1.70   0 0.98373-0.64075 0.04200-0.46482 0.19354-0.62718
   5  -8  -9    6.80    1.28   0 0.98694-0.64459 0.02676-0.40300 0.17709-0.66497
   5  -6 -10    1.99    1.15   0 0.98787-0.64562 0.02178-0.30304 0.17169-0.71499
   5  -5 -10   10.24    1.81   0 0.98458-0.64179 0.03819-0.27134 0.18944-0.73085
   5  -1 -11    0.23    1.29   0 0.98716-0.64440 0.02559-0.07371 0.17582-0.77275
   5   0 -11    2.91    1.18   0 0.98653-0.64261 0.02882-0.02695 0.17931-0.77687
   5   1 -11    0.44    1.26   0 0.98653-0.64220 0.02882 0.02054 0.17931-0.77695
   5   2 -11    1.81    1.27   0 0.98710-0.64228 0.02589 0.07069 0.17614-0.77341
   5   6 -10    0.54    1.83   0 0.97960-0.63222 0.05876 0.22516 0.21156-0.74990
   5  15  -4   -0.35    1.85   0 0.98181-0.62441 0.05009 0.66057 0.20225-0.41711
   5  16  -2    2.72    1.90   0 0.98501-0.62548 0.03618 0.72256 0.18726-0.28935
   6 -15  -4    3.18    1.38   0 0.98688-0.57185 0.02706-0.73229 0.17741-0.39095
   6 -14  -5   18.11    1.94   0 0.98461-0.56996 0.03801-0.69577 0.18924-0.45618
   6 -13  -6    4.95    1.73   0 0.98376-0.56989 0.04183-0.65330 0.19336-0.51601
   6 -12  -7   -0.02    1.73   0 0.98409-0.57153 0.04039-0.60739 0.19180-0.56823
   6 -11  -8   -0.99    1.71   0 0.98445-0.57108 0.03878-0.55397 0.19007-0.62121
   6 -10  -9    0.09    1.26   0 0.98682-0.57502 0.02735-0.49923 0.17772-0.66283
   6  -8 -10    0.38    1.20   0 0.98600-0.57436 0.03145-0.40935 0.18216-0.72239
   6  -6 -11   -0.21    1.24   0 0.98738-0.57583 0.02442-0.30808 0.17455-0.76974
   6  -5 -11   -0.62    1.79   0 0.98451-0.57241 0.03848-0.27486 0.18975-0.78456
   6  -1 -12    3.10    1.37   0 0.98733-0.57390 0.02471-0.06933 0.17487-0.82626
   6   0 -12    7.45    1.29   0 0.98682-0.57410 0.02735-0.02723 0.17772-0.82827
   6   1 -12    1.47    1.37   0 0.98676-0.57244 0.02764 0.02222 0.17804-0.82914
   6   2 -12    0.53    1.29   0 0.98733-0.57255 0.02471 0.07238 0.17487-0.82576
   6   6 -11    0.04    1.89   0 0.98319-0.56555 0.04432 0.24336 0.19604-0.79552
   6   9 -10    5.35    2.48   0 0.98197-0.56251 0.04943 0.37669 0.20154-0.74220
   7  -5 -12    0.20    1.38   0 0.98594-0.50394 0.03175-0.26785 0.18248-0.83165
   7  -4 -12   -0.46    1.84   0 0.98392-0.50170 0.04112-0.23060 0.19259-0.84389
   0  -3   6  101.05    3.25   0 0.97580-0.97182 0.07188-0.21138 0.22593 0.10186
   0  -2   7   47.24    2.19   0 0.97742-0.97209 0.06628-0.15874 0.21995 0.16269
   0  -1   7  108.82    2.23   0 0.98216-0.97621 0.04824-0.09400 0.20060 0.18204
   0   0   8  503.69    4.14   0 0.97763-0.97038 0.06554-0.06332 0.21916 0.21830
   0   1   8  132.07    2.52   0 0.97864-0.97100 0.06191-0.01278 0.21527 0.22229
   0   2   0 3153.62   18.32   0 0.98223-0.98124 0.04795 0.04827 0.20029-0.20119
   0   2   8   49.20    1.93   0 0.97844-0.97028 0.06263 0.03383 0.21605 0.22169
   0   3   7   12.38    1.21   0 0.98216-0.97451 0.04824 0.09544 0.20060 0.18250
   0   3   8  101.43    2.05   0 0.97723-0.96867 0.06694 0.07693 0.22065 0.21687
   0   4   1    3.63    1.77   0 0.98286-0.98045 0.04532 0.14246 0.19746-0.14347
   0   4   7    3.41    1.46   0 0.97972-0.97189 0.05787 0.13231 0.21094 0.17261
   0   5   2  385.83    3.69   0 0.98180-0.97767 0.04970 0.18780 0.20218-0.09304
   0   5   5   10.46    1.22   0 0.98258-0.97578 0.04649 0.19067 0.19871 0.07525
   0   5   6    2.31    1.43   0 0.98018-0.97262 0.05613 0.18047 0.20908 0.11968
   0   6   3   57.30    2.07   0 0.97810-0.97274 0.06387 0.22093 0.21737-0.05397
   0   6   4   15.64    1.74   0 0.97879-0.97284 0.06133 0.22271 0.21466 0.00385
   0   6   5    7.42    1.60   0 0.97797-0.97092 0.06431 0.22033 0.21784 0.05595
   1  -7   1  452.08    4.66   0 0.97678-0.90827 0.06851-0.39723 0.22234-0.16792
   1  -6  -1  314.01    3.37   0 0.98173-0.91463 0.05000-0.33126 0.20249-0.25817
   1  -5  -2   58.60    1.84   0 0.98230-0.91559 0.04766-0.28157 0.19997-0.31028
   1  -3  -3  706.44    5.16   0 0.97905-0.91190 0.06040-0.19995 0.21365-0.37834
   1  -3  11   21.35    1.68   0 0.97595-0.89613 0.07137-0.21057 0.22539 0.37870
   1  -2  11    0.07    1.58   0 0.98048-0.90003 0.05497-0.14790 0.20783 0.39675
   1   1  -4  952.46    7.20   0 0.98173-0.91396 0.05000-0.00077 0.20249-0.42140
   1   3  11   19.90    1.37   0 0.98279-0.90064 0.04561 0.09760 0.19777 0.40632
   1   4  11   20.69    1.29   0 0.98100-0.89868 0.05292 0.13771 0.20563 0.39864
   1   5  11    4.57    1.64   0 0.97865-0.89579 0.06187 0.17610 0.21523 0.38971
   1   6  10   47.49    1.51   0 0.98188-0.89981 0.04941 0.23547 0.20186 0.34733
   1   7  10   26.14    1.75   0 0.97844-0.89537 0.06261 0.27027 0.21603 0.33322
   1   8   9   44.58    1.86   0 0.97922-0.89711 0.05977 0.31973 0.21298 0.28209
   1   9   0   56.54    2.15   0 0.98029-0.90572 0.05570 0.37039 0.20861-0.20731
   1   9   7   39.57    1.37   0 0.98202-0.90123 0.04883 0.37770 0.20123 0.18391
   1   9   8    8.32    1.63   0 0.97860-0.89653 0.06206 0.36522 0.21543 0.22488
   1  10   2  136.32    2.38   0 0.97929-0.90268 0.05950 0.41415 0.21269-0.10172
   1  10   3   14.04    1.37   0 0.98115-0.90355 0.05234 0.42050 0.20500-0.03864
   1  10   4  125.11    1.97   0 0.98130-0.90275 0.05175 0.42171 0.20437 0.01638
   1  10   5   -0.49    1.17   0 0.98040-0.90145 0.05526 0.41777 0.20814 0.06688
   1  10   6   39.68    1.86   0 0.97871-0.89837 0.06165 0.41231 0.21499 0.11504
   2 -10   1   58.74    2.08   0 0.97910-0.83996 0.06020-0.53054 0.21345-0.15717
   2 -10   6   48.67    3.21   0 0.96943-0.82540 0.09192-0.56264 0.24726 0.08295
   2  -9  -1  113.82    2.33   0 0.97881-0.84130 0.06128-0.48451 0.21460-0.26813
   2  -7  11   61.05    2.75   0 0.97923-0.82980 0.05970-0.38784 0.21291 0.39273
   2  -6  -4  104.84    2.18   0 0.97847-0.84314 0.06252-0.34392 0.21592-0.43383
   2  -6  12    6.12    2.10   0 0.97456-0.82405 0.07601-0.35641 0.23034 0.43089
   2  -5  -5   24.71    1.34   0 0.98307-0.84831 0.04444-0.27835 0.19651-0.46953
   2  -4  13   14.70    1.79   0 0.97713-0.82483 0.06731-0.25303 0.22105 0.49425
   2  -3  13   18.31    1.55   0 0.98209-0.82901 0.04853-0.18840 0.20092 0.51428
   2  -2  -6   14.86    1.37   0 0.98188-0.84680 0.04941-0.14179 0.20186-0.52920
   2  -1  -6    8.52    1.76   0 0.97843-0.84246 0.06268-0.10859 0.21610-0.54363
   2   0  14   -1.10    1.69   0 0.97818-0.82301 0.06358-0.05931 0.21706 0.55126
   2   1  14    5.40    1.71   0 0.97839-0.82279 0.06280-0.01280 0.21622 0.55407
   2   2  14   -0.94    1.76   0 0.97842-0.82273 0.06271 0.03569 0.21613 0.55267
   2   3  14    7.81    1.63   0 0.97733-0.82173 0.06659 0.07842 0.22028 0.54939
   2   5  13   22.58    1.42   0 0.98202-0.82597 0.04883 0.18953 0.20123 0.51446
   2   6  13    1.15    1.70   0 0.97874-0.82382 0.06153 0.22523 0.21487 0.50335
   2   7  12    0.33    1.14   0 0.98300-0.82765 0.04473 0.28897 0.19683 0.46318
   2   8  12   12.70    1.72   0 0.97954-0.82342 0.05855 0.32106 0.21167 0.44948
   2   9  11    1.72    1.22   0 0.98122-0.82538 0.05204 0.37532 0.20469 0.40201
   2  10  -3  145.50    3.49   0 0.97557-0.83270 0.07265 0.40035 0.22676-0.38900
   2  10  10    1.30    1.21   0 0.98166-0.82632 0.05029 0.42416 0.20280 0.34907
   2  11  -2   12.04    1.99   0 0.97556-0.83156 0.07270 0.44699 0.22681-0.33392
   2  11   9    3.34    1.26   0 0.98078-0.82602 0.05380 0.46784 0.20657 0.29058
   2  12   0   70.64    2.14   0 0.97986-0.83366 0.05733 0.51041 0.21036-0.20727
   2  12   7    0.28    1.13   0 0.98151-0.82884 0.05087 0.51746 0.20343 0.18210
   2  12   8   -1.04    1.62   0 0.97854-0.82488 0.06227 0.50612 0.21566 0.22444
   2  13   3    1.05    1.76   0 0.97841-0.82840 0.06272 0.55233 0.21614-0.04811
   2  13   4    9.76    1.75   0 0.97858-0.82824 0.06211 0.55330 0.21549 0.00645
   2  13   5   13.07    1.67   0 0.97800-0.82686 0.06420 0.55105 0.21773 0.05872
   3 -12   0   14.31    1.35   0 0.98251-0.77466 0.04678-0.61174 0.19903-0.19666
   3 -12   1    7.70    1.59   0 0.97833-0.77003 0.06301-0.62768 0.21646-0.15848
   3 -11  -2  189.45    2.39   0 0.98251-0.77660 0.04678-0.56421 0.19903-0.30672
   3 -10  -3   12.54    1.74   0 0.97968-0.77342 0.05803-0.52861 0.21112-0.37312
   3  -9  -4   27.14    1.73   0 0.97882-0.77328 0.06124-0.48405 0.21456-0.43078
   3  -8  -5  161.54    2.09   0 0.98040-0.77613 0.05526-0.43091 0.20814-0.48008
   3  -6  14    8.70    1.95   0 0.97659-0.75227 0.06917-0.34923 0.22304 0.54890
   3  -5  -7   70.17    1.66   0 0.98300-0.77933 0.04473-0.27879 0.19683-0.57800
   3  -4  -7  104.65    2.16   0 0.97824-0.77397 0.06335-0.25091 0.21681-0.59764
   3  -1  -8   39.76    1.50   0 0.98216-0.77755 0.04824-0.09364 0.20060-0.63614
   3   0  -8   -1.27    1.57   0 0.97968-0.77518 0.05803-0.05961 0.21112-0.64280
   3   1  -8   40.77    2.07   0 0.97959-0.77384 0.05835-0.00964 0.21146-0.64660
   3   2  -8   -1.29    1.67   0 0.97945-0.77393 0.05891 0.03372 0.21206-0.64517
   3  13  -2   73.78    2.29   0 0.98149-0.76628 0.05096 0.56403 0.20352-0.30830
   3  13   9   11.13    1.34   0 0.98237-0.75733 0.04736 0.56820 0.19966 0.29855
   3  14   0  112.38    2.22   0 0.98144-0.76423 0.05117 0.61120 0.20375-0.19863
   3  14   7   11.19    1.30   0 0.98216-0.75847 0.04824 0.61397 0.20060 0.18826
   3  14   8   14.83    1.95   0 0.97933-0.75442 0.05935 0.60338 0.21253 0.23155
   3  15   3   19.54    1.79   0 0.97816-0.75723 0.06365 0.64600 0.21714-0.04807
   3  15   4    6.49    1.80   0 0.97834-0.75622 0.06298 0.64787 0.21642 0.00783
   3  15   5    4.56    1.81   0 0.97794-0.75508 0.06443 0.64545 0.21797 0.06069
   4 -14   2   -0.62    1.79   0 0.97952-0.69978 0.05862-0.71513 0.21175-0.09638
   4 -14   3   89.41    2.51   0 0.97846-0.69721 0.06255-0.72171 0.21596-0.04649
   4 -14   4    0.73    1.65   0 0.97789-0.69592 0.06460-0.72350 0.21816 0.00506
   4 -14   5   15.87    1.93   0 0.97879-0.69518 0.06133-0.72024 0.21465 0.06457
   4 -13  -1    4.29    1.68   0 0.97870-0.70150 0.06168-0.67192 0.21503-0.26599
   4 -12  -3    3.40    1.29   0 0.98048-0.70431 0.05497-0.61986 0.20783-0.36898
   4 -11  -4    5.38    1.63   0 0.97838-0.70278 0.06285-0.58072 0.21628-0.43171
   4 -10  -5   33.96    1.80   0 0.97805-0.70370 0.06402-0.53442 0.21753-0.48742
   4  -9  -6   63.54    1.89   0 0.97904-0.70430 0.06042-0.48318 0.21368-0.53807
   4  -8  -7   25.70    1.29   0 0.98216-0.70899 0.04824-0.42389 0.20060-0.58060
   4  -6  -8    0.64    1.12   0 0.98144-0.70800 0.05117-0.33289 0.20375-0.63843
   4  -3  -9    0.97    1.28   0 0.98122-0.70754 0.05204-0.19213 0.20469-0.69400
   4  -2  -9   51.46    2.03   0 0.97809-0.70390 0.06390-0.15716 0.21741-0.70619
   4   5  -9    3.83    1.77   0 0.97969-0.70280 0.05800 0.17922 0.21109-0.69865
   4  15  -2    7.39    1.71   0 0.97852-0.69206 0.06234 0.64732 0.21573-0.31866
   4  16   0    2.18    1.91   0 0.97771-0.68754 0.06527 0.69197 0.21887-0.21250
   4  16   1   -0.89    1.58   0 0.97987-0.68996 0.05730 0.70429 0.21034-0.15222
   5 -15   0   19.61    1.54   0 0.98159-0.63296 0.05058-0.75680 0.20312-0.19720
   5 -15   1   27.15    1.97   0 0.97822-0.62874 0.06344-0.76928 0.21691-0.15566
   5 -14  -2   53.88    2.17   0 0.97921-0.63142 0.05978-0.71824 0.21299-0.31639
   5 -13  -4   44.13    1.68   0 0.98173-0.63665 0.05000-0.66163 0.20249-0.41646
   5 -12  -5   21.46    1.70   0 0.98013-0.63590 0.05632-0.62056 0.20928-0.47748
   5 -11  -6    1.68    1.50   0 0.97956-0.63525 0.05848-0.57381 0.21160-0.53425
   5 -10  -7    1.42    1.23   0 0.98137-0.63773 0.05146-0.52156 0.20406-0.58316
   5  -8  -8    0.91    1.61   0 0.97805-0.63420 0.06402-0.43986 0.21753-0.65084
   5  -7  -9    3.50    1.21   0 0.98286-0.64051 0.04532-0.37335 0.19746-0.68541
   5  -6  -9    1.73    1.63   0 0.97828-0.63480 0.06320-0.34486 0.21665-0.70531
   5  -4 -10    0.10    1.22   0 0.98188-0.63940 0.04941-0.23919 0.20186-0.74363
   5  -3 -10    9.16    1.74   0 0.97854-0.63545 0.06226-0.20286 0.21565-0.75751
   5   5 -10   12.50    1.74   0 0.97545-0.62927 0.07306 0.16263 0.22720-0.76933
   5  16  -3   -0.42    1.69   0 0.97545-0.61756 0.07306 0.68469 0.22720-0.38757
   6 -15  -3    6.60    1.42   0 0.98244-0.56637 0.04707-0.75240 0.19934-0.35717
   6 -15  -2   -2.21    1.75   0 0.97810-0.56180 0.06387-0.77205 0.21738-0.31946
   6 -14  -4    1.45    1.79   0 0.97907-0.56322 0.06031-0.71828 0.21356-0.42705
   6 -10  -8   -0.13    1.63   0 0.97886-0.56560 0.06110-0.53252 0.21441-0.64395
   6  -9  -9    1.71    1.30   0 0.98223-0.56923 0.04795-0.47040 0.20029-0.68789
   6  -7 -10    2.23    1.19   0 0.98195-0.56902 0.04912-0.37692 0.20155-0.74344
   6  -6 -10    0.22    1.46   0 0.97748-0.56389 0.06606-0.34711 0.21972-0.76156
   6  -4 -11   -0.83    1.33   0 0.98173-0.56926 0.05000-0.23934 0.20249-0.79796
   6  -3 -11    1.85    1.80   0 0.97875-0.56509 0.06148-0.20063 0.21481-0.81129
   6   5 -11   -0.77    1.58   0 0.97752-0.56069 0.06592 0.17110 0.21956-0.81844
   7 -10  -9    4.59    1.86   0 0.97888-0.49528 0.06103-0.53004 0.21433-0.70056
   7  -9 -10   -1.11    1.36   0 0.98244-0.50004 0.04707-0.47152 0.19934-0.73817
   7  -8 -10   -0.26    1.61   0 0.97805-0.49458 0.06402-0.44328 0.21753-0.75900
   7  -7 -11    3.04    1.32   0 0.98293-0.50009 0.04502-0.37235 0.19714-0.79278
   7  -6 -11   -2.93    1.83   0 0.97886-0.49601 0.06110-0.34425 0.21441-0.80780
   7  -3 -12    1.26    1.38   0 0.98100-0.49750 0.05292-0.19138 0.20563-0.85570
   7  -2 -12   -0.75    1.77   0 0.97878-0.49530 0.06139-0.15593 0.21472-0.86395
   7  -1 -12   -0.02    1.63   0 0.97870-0.49348 0.06168-0.10636 0.21503-0.87223
   7   4 -12   -0.97    1.97   0 0.97805-0.49213 0.06402 0.12564 0.21753-0.86896
   7   5 -12    0.15    1.97   0 0.97870-0.49137 0.06168 0.17641 0.21503-0.86012
   0  -1   8  130.49    2.34   0 0.97455-0.96793 0.07593-0.12129 0.23047 0.20714
   0   0   9   -1.66    1.55   0 0.97065-0.96115 0.08814-0.08688 0.24348 0.24763
   0   1   9   75.57    2.15   0 0.97154-0.96281 0.08545-0.03667 0.24062 0.25187
   0   2   9    3.78    1.59   0 0.97181-0.96263 0.08462 0.01044 0.23973 0.25352
   0   3   0    0.37    1.89   0 0.97594-0.97488 0.07128 0.07077 0.22549-0.22521
   0   3   9  106.42    2.23   0 0.97092-0.96171 0.08734 0.05578 0.24263 0.25001
   0   4   8   69.93    1.61   0 0.97516-0.96615 0.07390 0.11669 0.22829 0.20941
   0   5   1    0.89    1.38   0 0.97569-0.97291 0.07215 0.16435 0.22643-0.17105
   0   5   7   16.87    1.21   0 0.97671-0.96816 0.06865 0.16918 0.22269 0.16053
   0   5   8    1.18    1.60   0 0.97200-0.96285 0.08404 0.15292 0.23911 0.20059
   0   6   2 1067.57    5.60   0 0.97499-0.97046 0.07448 0.21020 0.22892-0.12014
   0   6   6   -0.32    1.06   0 0.97586-0.96824 0.07157 0.21185 0.22580 0.10309
   0   6   7   30.96    1.73   0 0.97263-0.96389 0.08207 0.20296 0.23702 0.14648
   0   7   3  589.09    4.08   0 0.97127-0.96551 0.08628 0.24540 0.24151-0.07759
   0   7   4    1.41    1.53   0 0.97283-0.96636 0.08146 0.24951 0.23637-0.01623
   0   7   5  207.99    2.58   0 0.97233-0.96505 0.08301 0.24922 0.23802 0.03547
   0   7   6   90.72    2.08   0 0.97069-0.96256 0.08804 0.24376 0.24337 0.08489
   1  -6   0    5.24    1.94   0 0.96948-0.90116 0.09163-0.37345 0.24719-0.24773
   1  -6   9   42.31    2.82   0 0.96960-0.89281 0.09129-0.37242 0.24683 0.24758
   1  -5  10   21.52    2.14   0 0.97123-0.89294 0.08639-0.32055 0.24162 0.30725
   1  -4  -2    9.85    2.09   0 0.97153-0.90447 0.08548-0.27205 0.24066-0.35021
   1  -2  -3  665.82    5.33   0 0.97069-0.90342 0.08803-0.18027 0.24337-0.40802
   1  -1  12   14.68    1.72   0 0.97253-0.89121 0.08238-0.12778 0.23734 0.42161
   1   0  12    1.94    1.12   0 0.97490-0.89258 0.07477-0.07376 0.22923 0.43034
   1   1  12   13.70    1.37   0 0.97586-0.89362 0.07157-0.02186 0.22580 0.43302
   1   2  12   -0.78    1.23   0 0.97586-0.89318 0.07157 0.02506 0.22580 0.43305
   1   3  12   15.28    1.32   0 0.97508-0.89181 0.07419 0.06961 0.22861 0.43043
   1   4  12    3.77    1.52   0 0.97327-0.88988 0.08005 0.11043 0.23487 0.42546
   1   5  12    0.64    1.71   0 0.97123-0.88710 0.08640 0.15130 0.24163 0.41831
   1   6  11    0.13    1.17   0 0.97586-0.89255 0.07157 0.21343 0.22580 0.37806
   1   7  11    2.21    1.64   0 0.97218-0.88816 0.08350 0.24832 0.23854 0.36687
   1   8  10   15.14    1.26   0 0.97410-0.89103 0.07739 0.30199 0.23202 0.31731
   1   9  -1  259.10    3.55   0 0.96882-0.89541 0.09356 0.33255 0.24924-0.30299
   1   9   9    1.78    1.20   0 0.97437-0.89136 0.07652 0.34960 0.23109 0.26463
   1  10   1   57.69    1.71   0 0.97551-0.89961 0.07273 0.40060 0.22705-0.17144
   1  10   7    0.73    1.03   0 0.97612-0.89485 0.07069 0.40286 0.22487 0.16144
   1  10   8   91.58    2.04   0 0.97264-0.89063 0.08204 0.39213 0.23699 0.20271
   1  11   3    4.95    1.65   0 0.97197-0.89415 0.08413 0.43689 0.23921-0.07298
   1  11   4  111.79    2.28   0 0.97303-0.89441 0.08082 0.44013 0.23569-0.01529
   1  11   5   16.41    1.71   0 0.97284-0.89296 0.08141 0.43977 0.23631 0.03915
   1  11   6   35.56    1.68   0 0.97149-0.89067 0.08561 0.43536 0.24078 0.08968
   2 -10   2   -0.24    1.63   0 0.97324-0.83339 0.08015-0.54883 0.23497-0.12198
   2 -10   3  267.13    3.73   0 0.96994-0.82953 0.09027-0.56115 0.24575-0.08065
   2 -10   5  295.24    4.69   0 0.96477-0.82171 0.10487-0.57568 0.26123 0.01398
   2  -9   0    8.55    1.69   0 0.97069-0.83303 0.08804-0.51097 0.24337-0.24220
   2  -8  -2  348.32    3.02   0 0.97620-0.84001 0.07040-0.44612 0.22456-0.33315
   2  -7  -3   31.71    1.35   0 0.97594-0.83995 0.07128-0.39978 0.22549-0.38897
   2  -5  13   18.61    1.85   0 0.96818-0.81658 0.09540-0.32899 0.25119 0.46417
   2  -4  -5   60.62    1.66   0 0.97704-0.84183 0.06749-0.25441 0.22144-0.49430
   2  -2  14   -1.10    1.66   0 0.97250-0.81963 0.08248-0.17341 0.23745 0.53360
   2  -1  14    5.39    1.37   0 0.97603-0.82157 0.07098-0.11617 0.22518 0.54503
   2   0  -6   11.30    1.39   0 0.97560-0.83986 0.07244-0.07064 0.22674-0.55355
   2   1  -6    9.38    1.93   0 0.97317-0.83673 0.08036-0.03183 0.23519-0.56147
   2   2  -6   17.28    2.00   0 0.97293-0.83607 0.08115 0.01471 0.23603-0.56258
   2   3  -6  189.72    3.50   0 0.97502-0.83752 0.07439 0.06864 0.22882-0.55554
   2   4  14   -1.92    1.35   0 0.97594-0.81984 0.07128 0.12074 0.22549 0.54412
   2   5  14    3.52    1.38   0 0.97392-0.81684 0.07797 0.15997 0.23265 0.53827
   2   6  14    5.09    1.87   0 0.97123-0.81450 0.08640 0.19875 0.24163 0.52868
   2   7  13    4.89    1.31   0 0.97637-0.81937 0.06982 0.26266 0.22393 0.49216
   2   8  13    2.79    1.73   0 0.97219-0.81564 0.08346 0.29698 0.23850 0.47871
   2   9  -4   96.44    3.79   0 0.96283-0.82195 0.11002 0.31621 0.26667-0.48312
   2   9  12    8.70    1.28   0 0.97534-0.81906 0.07331 0.35360 0.22767 0.43273
   2  10  11   29.57    1.56   0 0.97654-0.82050 0.06924 0.40541 0.22331 0.38252
   2  10  12    0.84    1.57   0 0.97180-0.81290 0.08466 0.38562 0.23977 0.41692
   2  11  10    0.29    1.31   0 0.97629-0.82143 0.07011 0.45150 0.22425 0.32601
   2  11  11    4.73    1.82   0 0.97085-0.81482 0.08756 0.43340 0.24287 0.36387
   2  12  -1    6.83    1.67   0 0.97165-0.82647 0.08513 0.48295 0.24028-0.29182
   2  12   9   -1.08    1.17   0 0.97464-0.82026 0.07564 0.49290 0.23016 0.26512
   2  12  10   18.10    1.71   0 0.96991-0.81484 0.09037 0.47783 0.24586 0.30491
   2  13   1   73.06    2.20   0 0.97258-0.82549 0.08223 0.53288 0.23718-0.17973
   2  13   2  262.99    2.84   0 0.97646-0.82798 0.06953 0.54560 0.22362-0.11142
   2  13   6   32.42    1.56   0 0.97646-0.82461 0.06953 0.54584 0.22362 0.10825
   2  13   7    5.83    1.12   0 0.97419-0.82129 0.07710 0.53822 0.23171 0.15581
   2  13   8   19.39    1.70   0 0.97122-0.81723 0.08643 0.52874 0.24166 0.20005
   3 -12   2   17.82    1.59   0 0.97407-0.76432 0.07748-0.64216 0.23212-0.11961
   3 -12   3    9.51    1.71   0 0.97091-0.76032 0.08738-0.65255 0.24267-0.07636
   3 -12   4   -0.15    1.60   0 0.97022-0.75944 0.08945-0.65655 0.24487-0.02031
   3 -12   5   27.87    2.33   0 0.96858-0.75574 0.09425-0.65962 0.24997 0.02622
   3 -12   6    0.60    1.77   0 0.97246-0.75883 0.08262-0.64827 0.23761 0.09417
   3 -11  -1   34.06    1.49   0 0.97612-0.76921 0.07069-0.58833 0.22487-0.27714
   3 -10  -2    5.88    1.68   0 0.97137-0.76440 0.08598-0.55739 0.24118-0.34800
   3  -9  12    2.46    2.44   0 0.96814-0.74707 0.09551-0.51808 0.25131 0.41022
   3  -8  13    0.71    2.30   0 0.96887-0.74609 0.09341-0.46814 0.24908 0.46579
   3  -7  -5   26.48    1.71   0 0.97189-0.76661 0.08438-0.41276 0.23948-0.51052
   3  -6  -6  160.13    2.12   0 0.97704-0.77282 0.06749-0.34895 0.22144-0.54771
   3  -3  -7   18.58    1.64   0 0.97298-0.76830 0.08099-0.22094 0.23586-0.61638
   3   6  -7   26.20    2.38   0 0.96639-0.75819 0.10043 0.18414 0.25653-0.63653
   3  14  -1   30.37    1.62   0 0.97516-0.75886 0.07390 0.58830 0.22829-0.27874
   3  15   1    1.59    1.71   0 0.97329-0.75449 0.08001 0.62969 0.23482-0.17557
   3  15   2    9.42    1.34   0 0.97646-0.75727 0.06953 0.63982 0.22362-0.10954
   3  15   6    3.11    1.37   0 0.97646-0.75232 0.06953 0.64122 0.22362 0.11063
   3  15   7    8.24    1.41   0 0.97437-0.74943 0.07652 0.63396 0.23109 0.15751
   4 -13   0   87.93    2.20   0 0.97352-0.69502 0.07927-0.69102 0.23403-0.22951
   4 -13   8    7.01    2.52   0 0.96769-0.68051 0.09680-0.70952 0.25268 0.19015
   4 -12  -2    8.66    1.63   0 0.97356-0.69732 0.07913-0.64360 0.23389-0.33916
   4  -8  -6    1.17    1.56   0 0.97160-0.69690 0.08526-0.46181 0.24041-0.56574
   4  -7  -7   34.86    1.37   0 0.97594-0.70237 0.07128-0.39997 0.22549-0.60504
   4  -5  -8   16.57    1.32   0 0.97637-0.70252 0.06982-0.30411 0.22393-0.65839
   4  -4  -8   28.13    1.84   0 0.97089-0.69712 0.08743-0.27427 0.24273-0.67693
   4  -1  -9    2.74    1.26   0 0.97543-0.70105 0.07302-0.11867 0.22736-0.71623
   4   0  -9   -0.30    1.68   0 0.97246-0.69784 0.08262-0.08360 0.23761-0.72404
   4   1  -9    1.82    1.68   0 0.97164-0.69626 0.08514-0.03617 0.24029-0.72911
   4   2  -9   51.05    2.05   0 0.97146-0.69623 0.08571 0.01006 0.24090-0.72958
   4   3  -9   -0.05    1.64   0 0.97236-0.69631 0.08291 0.06078 0.23792-0.72655
   4   4  -9    0.14    1.17   0 0.97534-0.69948 0.07331 0.11491 0.22767-0.71631
   4  13  -5   11.27    2.45   0 0.96508-0.68264 0.10403 0.51117 0.26034-0.52804
   4  14  -4    0.75    2.03   0 0.96695-0.68295 0.09887 0.56451 0.25488-0.46805
   4  16  -1    0.27    1.92   0 0.97027-0.68170 0.08930 0.66935 0.24472-0.29383
   5 -15   2   23.69    1.58   0 0.97543-0.62484 0.07302-0.77922 0.22736-0.11191
   5 -15   3    8.91    1.95   0 0.97283-0.62048 0.08146-0.78722 0.23637-0.06607
   5 -15   4    0.56    1.77   0 0.97197-0.61936 0.08412-0.78999 0.23921-0.01491
   5 -15   5    4.50    1.88   0 0.97193-0.61817 0.08424-0.78925 0.23933 0.03972
   5 -14  -1   37.00    1.54   0 0.97410-0.62635 0.07739-0.73647 0.23202-0.28092
   5 -13  -3   17.27    1.40   0 0.97516-0.62905 0.07390-0.68558 0.22829-0.38713
   5 -12  -4   -1.20    1.66   0 0.97208-0.62655 0.08379-0.64902 0.23885-0.45033
   5 -11  -5   19.74    1.76   0 0.97113-0.62618 0.08669-0.60399 0.24194-0.51044
   5 -10  -6   28.19    1.77   0 0.97173-0.62711 0.08486-0.55434 0.23999-0.56354
   5  -9  -7    2.81    1.23   0 0.97437-0.63010 0.07652-0.49939 0.23109-0.61011
   5  -7  -8    1.91    1.55   0 0.97152-0.62728 0.08553-0.41411 0.24070-0.67385
   5  -5  -9   17.10    1.74   0 0.97272-0.62884 0.08179-0.31595 0.23672-0.72374
   5  -2 -10    0.84    1.34   0 0.97551-0.63142 0.07273-0.16480 0.22705-0.76978
   5  -1 -10    5.07    1.78   0 0.97237-0.62799 0.08289-0.12784 0.23789-0.77935
   5   0 -10   -0.37    1.82   0 0.97180-0.62746 0.08466-0.08240 0.23977-0.78562
   5   3 -10    8.54    1.65   0 0.96934-0.62411 0.09205 0.05097 0.24764-0.78997
   5   4 -10    0.24    1.67   0 0.97161-0.62572 0.08524 0.10340 0.24039-0.78309
   5   8  -9    7.06    2.13   0 0.96627-0.61766 0.10077 0.27780 0.25689-0.74417
   6 -15  -1   20.65    2.02   0 0.97173-0.55348 0.08487-0.78966 0.24000-0.28781
   6 -14  -3    0.15    1.82   0 0.97246-0.55534 0.08262-0.74098 0.23761-0.39637
   6 -13  -5   10.83    1.33   0 0.97704-0.56225 0.06749-0.67907 0.22144-0.48864
   6 -12  -6   12.42    1.33   0 0.97620-0.56151 0.07040-0.63480 0.22456-0.54634
   6 -11  -7   14.13    1.33   0 0.97704-0.56355 0.06749-0.58474 0.22144-0.59822
   6  -9  -8    6.47    1.67   0 0.97181-0.55790 0.08461-0.50594 0.23973-0.67130
   6  -8  -9    1.13    1.25   0 0.97671-0.56307 0.06865-0.44374 0.22269-0.71009
   6  -7  -9    2.83    1.50   0 0.97036-0.55619 0.08901-0.41714 0.24441-0.73127
   6  -5 -10    0.71    1.67   0 0.97245-0.55848 0.08265-0.31577 0.23764-0.77875
   6  -2 -11    1.62    1.42   0 0.97594-0.56190 0.07128-0.16278 0.22549-0.82169
   6  -1 -11    0.92    1.59   0 0.97356-0.55915 0.07913-0.12342 0.23389-0.83016
   6   0 -11   -0.26    1.59   0 0.97180-0.55708 0.08466-0.08172 0.23977-0.83646
   6   1 -11    1.74    1.71   0 0.97068-0.55552 0.08807-0.03808 0.24341-0.84035
   6   2 -11    5.62    1.81   0 0.97007-0.55548 0.08989 0.00543 0.24534-0.84095
   6   3 -11    2.09    1.83   0 0.97120-0.55536 0.08648 0.05825 0.24172-0.83868
   6   4 -11   -0.82    1.80   0 0.97232-0.55618 0.08306 0.10580 0.23807-0.83312
   6   8 -10    0.97    2.06   0 0.96778-0.54896 0.09656 0.28443 0.25242-0.79346
   7 -13  -6    1.63    1.34   0 0.97464-0.48913 0.07564-0.68633 0.23016-0.55222
   7 -12  -7    1.71    1.36   0 0.97481-0.48991 0.07506-0.63871 0.22954-0.60652
   7 -11  -8    3.26    1.40   0 0.97620-0.49183 0.07040-0.58653 0.22456-0.65604
   7  -9  -9    0.74    1.81   0 0.97246-0.48829 0.08262-0.50432 0.23761-0.72379
   7  -7 -10    1.23    1.70   0 0.97183-0.48781 0.08455-0.41198 0.23966-0.78043
   7  -5 -11    3.72    1.38   0 0.97472-0.49093 0.07535-0.30801 0.22985-0.82509
   7  -4 -11   -0.91    1.78   0 0.97113-0.48765 0.08669-0.27616 0.24194-0.83809
   7   0 -12    0.30    1.39   0 0.97543-0.49117 0.07302-0.07259 0.22736-0.87680
   7   1 -12   -0.48    1.31   0 0.97455-0.48984 0.07593-0.02819 0.23047-0.87985
   7   2 -12    0.58    1.30   0 0.97455-0.48907 0.07593 0.02208 0.23047-0.88017
   7   3 -12    0.13    1.32   0 0.97543-0.48987 0.07302 0.06938 0.22736-0.87699
   0  -3   7   11.12    1.89   0 0.96694-0.96211 0.09824-0.23827 0.25449 0.12821
   0  -2   8   44.59    1.84   0 0.96836-0.96236 0.09418-0.18709 0.25018 0.18729
   0  -1   9   69.20    2.16   0 0.96531-0.95801 0.10274-0.14845 0.25926 0.23320
   0   1  10    4.05    1.61   0 0.96285-0.95303 0.10930-0.06111 0.26621 0.28198
   0   2  10   11.36    1.73   0 0.96356-0.95398 0.10742-0.01181 0.26421 0.28383
   0   3  10    1.17    1.62   0 0.96343-0.95300 0.10778 0.03471 0.26459 0.28416
   0   4   0  127.27    3.06   0 0.96816-0.96645 0.09476 0.09561 0.25079-0.25133
   0   4   9   19.76    1.40   0 0.96917-0.95953 0.09186 0.09854 0.24771 0.24511
   0   4  10   62.31    2.09   0 0.96199-0.95162 0.11153 0.07851 0.26856 0.27931
   0   5   9  186.21    2.25   0 0.96631-0.95673 0.09998 0.13769 0.25633 0.23661
   0   6   1 1799.92    7.77   0 0.96704-0.96363 0.09795 0.18676 0.25418-0.19967
   0   6   8   -0.41    1.15   0 0.96836-0.95900 0.09418 0.18970 0.25018 0.18815
   0   6   9   48.73    1.89   0 0.96294-0.95268 0.10905 0.17548 0.26594 0.22739
   0   7   2  753.78    4.56   0 0.96662-0.96202 0.09911 0.23271 0.25541-0.14603
   0   7   7    1.77    1.10   0 0.96776-0.95874 0.09592 0.23534 0.25202 0.13272
   0   7   8   12.57    1.69   0 0.96363-0.95408 0.10723 0.22448 0.26402 0.17439
   0   8   3   14.23    1.61   0 0.96296-0.95712 0.10901 0.26969 0.26590-0.10097
   0   8   4   94.88    2.03   0 0.96544-0.95860 0.10237 0.27662 0.25886-0.03966
   0   8   5   63.41    1.56   0 0.96568-0.95823 0.10171 0.27716 0.25817 0.01572
   0   8   6   84.64    1.99   0 0.96435-0.95628 0.10532 0.27358 0.26199 0.06660
   0   8   7    2.13    1.59   0 0.96279-0.95221 0.10945 0.26797 0.26636 0.11736
   1  -7   2   54.68    2.47   0 0.96539-0.89527 0.10250-0.43131 0.25901-0.15033
   1  -5  -1  424.45    4.01   0 0.96755-0.89971 0.09650-0.33047 0.25264-0.30823
   1  -4  11   19.86    1.80   0 0.96724-0.88847 0.09737-0.28414 0.25356 0.35015
   1  -3  12   12.48    1.76   0 0.96131-0.88096 0.11327-0.25367 0.27041 0.38836
   1  -2  12   -0.49    1.19   0 0.96836-0.88766 0.09418-0.18604 0.25018 0.40891
   1   0  13    3.59    1.62   0 0.96332-0.88014 0.10806-0.10662 0.26489 0.44911
   1   1  13   -0.61    1.64   0 0.96353-0.88232 0.10750-0.05850 0.26430 0.45289
   1   2  13    1.70    1.48   0 0.96558-0.88204 0.10200-0.00627 0.25848 0.45637
   1   3  13   20.31    1.90   0 0.96526-0.88194 0.10287 0.04061 0.25940 0.45427
   1   4  13   10.20    1.72   0 0.96399-0.88036 0.10628 0.08491 0.26301 0.45077
   1   5  13    3.01    1.72   0 0.96198-0.87772 0.11154 0.12619 0.26858 0.44590
   1   6  -3   32.18    3.17   0 0.95831-0.88792 0.12077 0.16417 0.27831-0.44163
   1   6  12    1.97    1.22   0 0.96816-0.88405 0.09476 0.19004 0.25079 0.40950
   1   7  12    1.10    1.61   0 0.96451-0.88008 0.10490 0.22722 0.26154 0.39890
   1   8  -2   11.57    1.87   0 0.96326-0.89143 0.10821 0.27040 0.26505-0.37301
   1   8  11   11.14    1.26   0 0.96765-0.88440 0.09621 0.28278 0.25233 0.35183
   1   9  10    0.11    1.20   0 0.96887-0.88596 0.09273 0.33394 0.24864 0.30051
   1   9  11   96.15    2.24   0 0.96238-0.87876 0.11053 0.31600 0.26750 0.33756
   1  10   0   50.00    1.72   0 0.96735-0.89280 0.09708 0.37617 0.25326-0.25170
   1  10   9   31.70    1.40   0 0.96816-0.88572 0.09476 0.37889 0.25079 0.24444
   1  10  10   13.75    1.73   0 0.96286-0.87940 0.10928 0.36456 0.26618 0.28406
   1  11   1    0.25    1.62   0 0.96315-0.88758 0.10851 0.41039 0.26537-0.20989
   1  11   2    6.65    1.21   0 0.96887-0.89230 0.09273 0.42775 0.24864-0.13714
   1  11   7   12.20    1.23   0 0.96887-0.88757 0.09273 0.42847 0.24864 0.13728
   1  11   8   -0.85    1.48   0 0.96353-0.88397 0.10750 0.41866 0.26430 0.18022
   1  12   3   14.80    1.64   0 0.96114-0.88332 0.11371 0.45338 0.27086-0.10454
   1  12   4   13.73    1.70   0 0.96308-0.88429 0.10869 0.45939 0.26556-0.04412
   1  12   5   25.73    1.73   0 0.96350-0.88379 0.10757 0.46058 0.26438 0.01205
   1  12   6    7.83    1.58   0 0.96258-0.88202 0.11000 0.45809 0.26694 0.06435
   2 -10   4   37.51    2.09   0 0.96549-0.82344 0.10225-0.57298 0.25874-0.03899
   2  -9   1  162.37    2.74   0 0.96022-0.82103 0.11605-0.53939 0.27333-0.21825
   2  -8  -1   95.77    2.29   0 0.96392-0.82566 0.10648-0.48211 0.26322-0.31738
   2  -7  -2   77.24    2.11   0 0.96245-0.82554 0.11034-0.43888 0.26730-0.37666
   2  -6  -3  300.71    3.11   0 0.96370-0.82676 0.10705-0.38800 0.26383-0.42746
   2  -5  -4  726.70    4.23   0 0.96927-0.83323 0.09157-0.32537 0.24740-0.46587
   2  -4  14    1.08    1.67   0 0.96202-0.80780 0.11144-0.29738 0.26846 0.49836
   2  -3  -5   59.32    1.65   0 0.96966-0.83382 0.09041-0.22980 0.24617-0.51894
   2  -3  14    8.48    1.50   0 0.96796-0.81500 0.09534-0.23450 0.25141 0.51847
   2  -2  -5    4.46    1.63   0 0.96153-0.82523 0.11270-0.20545 0.26980-0.54249
   2  -1  15    3.02    1.76   0 0.96237-0.80705 0.11054-0.15542 0.26751 0.55745
   2   0  15    0.87    1.79   0 0.96504-0.80946 0.10345-0.10165 0.26001 0.56557
   2   1  15    4.40    1.40   0 0.96652-0.81084 0.09940-0.05082 0.25571 0.56985
   2   2  15    5.56    1.39   0 0.96714-0.81072 0.09766-0.00233 0.25387 0.57179
   2   3  15    0.55    1.32   0 0.96673-0.81070 0.09882 0.04647 0.25510 0.56956
   2   7  14    5.69    1.37   0 0.96776-0.81074 0.09592 0.23746 0.25202 0.51913
   2   9  13    3.99    1.26   0 0.96786-0.81084 0.09563 0.33161 0.25172 0.46496
   2  12  11    1.11    1.83   0 0.96370-0.80814 0.10706 0.46283 0.26384 0.34368
   2  13   0    1.00    1.67   0 0.96568-0.81920 0.10171 0.51398 0.25817-0.25453
   2  13   9    2.92    1.26   0 0.96704-0.81220 0.09795 0.51813 0.25418 0.24330
   2  13  10    5.68    1.82   0 0.96210-0.80701 0.11125 0.50475 0.26827 0.28370
   2  14   2   78.53    2.20   0 0.96386-0.81606 0.10662 0.55537 0.26337-0.14989
   2  14   3   72.37    1.83   0 0.96704-0.81814 0.09795 0.56423 0.25418-0.08614
   2  14   4    2.60    1.28   0 0.96836-0.81830 0.09418 0.56851 0.25018-0.02729
   2  14   5   28.16    1.49   0 0.96847-0.81746 0.09389 0.56846 0.24987 0.02789
   2  14   6    1.70    1.29   0 0.96735-0.81491 0.09708 0.56611 0.25326 0.07970
   2  14   7    4.30    1.76   0 0.96462-0.81229 0.10460 0.56021 0.26123 0.12708
   2  14   8    1.65    1.66   0 0.96242-0.80801 0.11042 0.55254 0.26739 0.17480
   3 -11   0   11.99    1.35   0 0.96847-0.76017 0.09389-0.61154 0.24987-0.24821
   3  -9  -3  115.04    1.94   0 0.96877-0.76244 0.09302-0.51590 0.24894-0.41140
   3  -8  -4    6.33    1.21   0 0.96917-0.76308 0.09186-0.46787 0.24771-0.46517
   3  -6  -5   26.70    1.74   0 0.96210-0.75664 0.11125-0.39254 0.26827-0.54024
   3  -5  -6   30.51    1.33   0 0.96946-0.76453 0.09099-0.32474 0.24678-0.57329
   3  -2  -7    1.43    1.07   0 0.96745-0.76201 0.09679-0.19008 0.25295-0.63369
   3  -1  -7   55.05    1.96   0 0.96229-0.75681 0.11076-0.15608 0.26775-0.64889
   3  12  -4    0.49    1.59   0 0.96483-0.75134 0.10403 0.46430 0.26062-0.47509
   3  13  -3   12.32    1.88   0 0.96579-0.75224 0.10142 0.51364 0.25786-0.41729
   3  14  -2   14.33    1.74   0 0.96284-0.74766 0.10932 0.55288 0.26623-0.37092
   3  15   0   -0.73    1.59   0 0.96536-0.74830 0.10258 0.61061 0.25909-0.25717
   3  16   2   -0.51    1.73   0 0.96320-0.74299 0.10836 0.64856 0.26522-0.15318
   3  16   3    7.89    1.68   0 0.96610-0.74570 0.10055 0.65642 0.25694-0.08701
   3  16   4   -0.85    1.30   0 0.96735-0.74547 0.09708 0.66069 0.25326-0.03136
   3  16   5    0.08    1.24   0 0.96745-0.74462 0.09679 0.66101 0.25295 0.02378
   4 -13   1   12.32    1.32   0 0.96796-0.68896 0.09534-0.70703 0.25141-0.19323
   4 -13   2   24.77    1.90   0 0.96245-0.68194 0.11034-0.72246 0.26730-0.15493
   4 -13   7    0.41    2.08   0 0.95986-0.67501 0.11693-0.73176 0.27427 0.11476
   4 -12  -1   84.50    2.32   0 0.96525-0.68710 0.10288-0.66759 0.25941-0.31080
   4 -12  10    4.34    3.18   0 0.94485-0.65541 0.15109-0.71601 0.31010 0.24223
   4 -11  -3    2.47    1.20   0 0.96956-0.69279 0.09070-0.60863 0.24648-0.40724
   4 -10  -4    2.81    1.17   0 0.96796-0.69178 0.09534-0.56634 0.25141-0.46679
   4  -9  -5   10.35    1.14   0 0.96857-0.69305 0.09360-0.51642 0.24956-0.52053
   4  -7  -6   83.18    2.01   0 0.96183-0.68671 0.11194-0.44018 0.26899-0.59443
   4  -6  -7    2.68    1.13   0 0.96836-0.69379 0.09418-0.37573 0.25018-0.62961
   4  -3  -8   52.13    1.99   0 0.96445-0.68902 0.10506-0.24475 0.26172-0.69578
   4   7  -8   -0.13    2.12   0 0.95569-0.67694 0.12707 0.20435 0.28495-0.71651
   4  15  -3    8.61    1.85   0 0.96382-0.67939 0.10674 0.60323 0.26350-0.42070
   5 -14   0   22.12    1.40   0 0.96816-0.61919 0.09476-0.75409 0.25079-0.24571
   5 -14   1   -0.11    1.72   0 0.96276-0.61377 0.10952-0.76997 0.26644-0.20483
   5 -13  -2   -0.98    1.29   0 0.96745-0.62036 0.09679-0.70945 0.25295-0.35543
   5 -12  -3    0.62    1.70   0 0.96276-0.61554 0.10952-0.67462 0.26644-0.42617
   5  -9  -6    6.22    1.49   0 0.96200-0.61697 0.11149-0.53499 0.26853-0.59246
   5  -8  -7    0.89    1.16   0 0.96579-0.62073 0.10142-0.47722 0.25786-0.63660
   5  -6  -8   25.95    1.85   0 0.96365-0.61894 0.10717-0.38779 0.26396-0.69647
   5  -4  -9   34.64    1.39   0 0.96714-0.62265 0.09766-0.28464 0.25387-0.74143
   5  -3  -9   15.50    1.68   0 0.96153-0.61719 0.11270-0.25206 0.26980-0.75749
   5   1 -10    5.98    1.30   0 0.96877-0.62382 0.09302-0.04477 0.24894-0.79092
   5   2 -10   -0.81    1.20   0 0.96826-0.62287 0.09447-0.00062 0.25048-0.79261
   5  15  -5   -0.27    2.17   0 0.95402-0.59878 0.13098 0.57847 0.28905-0.55823
   6 -15   0    1.07    1.66   0 0.96610-0.54622 0.10055-0.80635 0.25694-0.25106
   6 -14  -2    0.35    1.83   0 0.96413-0.54630 0.10591-0.76357 0.26262-0.36336
   6 -13  -4    9.35    1.41   0 0.96877-0.55259 0.09302-0.70433 0.24894-0.46230
   6 -12  -5    1.65    1.20   0 0.96683-0.55050 0.09853-0.66283 0.25479-0.52300
   6 -11  -6   -0.98    1.22   0 0.96683-0.55174 0.09853-0.61742 0.25479-0.57528
   6 -10  -7    4.68    1.26   0 0.96857-0.55399 0.09360-0.56330 0.24956-0.62682
   6  -8  -8    3.39    1.60   0 0.96371-0.54869 0.10701-0.48217 0.26379-0.69566
   6  -6  -9    4.29    1.65   0 0.96337-0.54863 0.10792-0.38908 0.26474-0.75182
   6  -4 -10    7.16    1.26   0 0.96755-0.55293 0.09650-0.28300 0.25264-0.79474
   6  -3 -10   -1.39    1.70   0 0.96298-0.54882 0.10894-0.25174 0.26583-0.80787
   7 -14  -4    8.78    1.50   0 0.96796-0.48118 0.09534-0.75343 0.25141-0.46322
   7 -13  -5   13.92    1.77   0 0.96538-0.47923 0.10252-0.71322 0.25903-0.52549
   7 -12  -6    2.77    1.74   0 0.96451-0.47818 0.10489-0.66824 0.26153-0.58301
   7 -11  -7    1.61    1.30   0 0.96568-0.47994 0.10171-0.61829 0.25817-0.63481
   7 -10  -8   -0.08    1.27   0 0.96826-0.48370 0.09447-0.56608 0.25048-0.67943
   7  -8  -9    5.89    1.61   0 0.96469-0.47974 0.10440-0.47906 0.26102-0.74606
   7  -6 -10    8.25    1.62   0 0.96548-0.48185 0.10226-0.38277 0.25875-0.79850
   7  -3 -11    1.38    1.29   0 0.96600-0.48105 0.10084-0.23943 0.25725-0.85267
   7  -2 -11    0.51    1.87   0 0.96276-0.47817 0.10952-0.20471 0.26644-0.86311
   7   7 -11    1.84    1.90   0 0.96385-0.47535 0.10665 0.22657 0.26340-0.85663
   8  -7 -10    1.12    1.64   0 0.96153-0.40641 0.11270-0.44037 0.26980-0.80959
   8  -5 -11    0.32    1.92   0 0.96440-0.40928 0.10518-0.33772 0.26185-0.85607
   0  -4   5   15.34    2.70   0 0.95118-0.94825 0.13722-0.32447 0.29579-0.02330
   0  -4   6  223.25    4.69   0 0.95014-0.94646 0.13954-0.32663 0.29821 0.02889
   0  -3   8   98.27    2.69   0 0.95642-0.95092 0.12510-0.26519 0.28308 0.15427
   0  -2   9    1.78    1.53   0 0.95777-0.95074 0.12185-0.21513 0.27966 0.21353
   0  -1  10    4.64    1.53   0 0.95449-0.94614 0.12967-0.17525 0.28787 0.26055
   0   0  10    1.19    1.14   0 0.95983-0.95077 0.11678-0.11549 0.27432 0.27434
   0   1  11    2.27    1.81   0 0.95260-0.94202 0.13401-0.08513 0.29243 0.31058
   0   2  11   25.51    1.90   0 0.95423-0.94371 0.13027-0.03407 0.28850 0.31401
   0   3  11    8.67    1.77   0 0.95443-0.94374 0.12979 0.01346 0.28800 0.31455
   0   4  11    2.66    1.61   0 0.95369-0.94202 0.13152 0.05904 0.28981 0.31361
   0   5   0    0.00    1.33   0 0.95913-0.95751 0.11852 0.11635 0.27614-0.27604
   0   5  10  238.80    2.54   0 0.95960-0.94899 0.11736 0.12035 0.27492 0.27310
   0   6  10  167.23    2.41   0 0.95637-0.94535 0.12523 0.15970 0.28321 0.26505
   0   7   1    4.74    1.83   0 0.95679-0.95344 0.12423 0.20737 0.28216-0.22714
   0   7   9   10.10    1.20   0 0.95855-0.94804 0.11996 0.21168 0.27766 0.21600
   0   7  10  151.29    2.35   0 0.95221-0.94100 0.13490 0.19699 0.29336 0.25506
   0   8   2  410.61    3.40   0 0.95713-0.95210 0.12342 0.25554 0.28130-0.17162
   0   8   8    7.53    1.14   0 0.95808-0.94821 0.12111 0.25850 0.27887 0.15941
   0   8   9    4.91    1.63   0 0.95326-0.94241 0.13251 0.24648 0.29085 0.20336
   0   9   3   21.91    1.68   0 0.95328-0.94719 0.13246 0.29384 0.29080-0.12570
   0   9   4  327.09    2.80   0 0.95689-0.94976 0.12399 0.30231 0.28191-0.06235
   0   9   5   35.29    1.49   0 0.95784-0.95007 0.12169 0.30483 0.27948-0.00494
   0   9   6   49.98    1.43   0 0.95713-0.94864 0.12342 0.30302 0.28130 0.04807
   0   9   7   55.32    1.85   0 0.95512-0.94564 0.12819 0.29814 0.28631 0.09768
   1  -7   3    0.86    1.77   0 0.95144-0.88046 0.13664-0.46632 0.29518-0.13129
   1  -7   8  203.61    6.39   0 0.94228-0.86634 0.15618-0.48632 0.31558 0.12278
   1  -6   1    9.13    1.95   0 0.95041-0.88120 0.13894-0.42026 0.29759-0.24425
   1  -6  10   43.41    2.73   0 0.94654-0.86910 0.14733-0.42871 0.30636 0.24212
   1  -5  11    2.87    1.81   0 0.95258-0.87326 0.13407-0.36829 0.29249 0.31098
   1  -4  12    4.61    1.57   0 0.95011-0.86985 0.13960-0.32652 0.29828 0.36018
   1  -3  -2 3099.11   10.90   0 0.95561-0.88775 0.12704-0.26640 0.28511-0.39523
   1  -2  13    0.39    1.70   0 0.95392-0.87179 0.13099-0.22312 0.28926 0.42439
   1  -1  -3  194.91    3.27   0 0.95948-0.89172 0.11765-0.16268 0.27523-0.43984
   1  -1  13    0.41    1.23   0 0.95948-0.87720 0.11765-0.16274 0.27523 0.43908
   1   1  14    9.09    1.68   0 0.95220-0.86848 0.13492-0.08549 0.29338 0.47481
   1   2  14    4.01    1.75   0 0.95391-0.86915 0.13102-0.03408 0.28929 0.47932
   1   3  14    3.12    1.68   0 0.95402-0.86907 0.13076 0.01343 0.28901 0.47996
   1   4  14    2.97    1.81   0 0.95407-0.86754 0.13063 0.06040 0.28888 0.47869
   1   6  13    0.11    1.24   0 0.95925-0.87485 0.11823 0.16846 0.27584 0.43770
   1   7  13    4.38    1.68   0 0.95547-0.87064 0.12737 0.20646 0.28546 0.42963
   1   8  12    3.22    1.17   0 0.96006-0.87544 0.11621 0.26409 0.27371 0.38673
   1   9  12    2.42    1.69   0 0.95465-0.87013 0.12929 0.29866 0.28747 0.37343
   1  10  -1    5.87    1.76   0 0.95157-0.87782 0.13634 0.33680 0.29487-0.34752
   1  10  11   19.88    1.81   0 0.95641-0.87268 0.12514 0.34854 0.28312 0.32176
   1  11   0  175.93    2.85   0 0.95174-0.87710 0.13596 0.38461 0.29447-0.29217
   1  11   9   -2.15    1.21   0 0.96120-0.87855 0.11332 0.40825 0.27066 0.22347
   1  11  10    5.92    1.68   0 0.95572-0.87225 0.12678 0.39492 0.28484 0.26606
   1  12   2   39.40    1.98   0 0.95639-0.87934 0.12519 0.44268 0.28316-0.17131
   1  12   7   41.90    1.46   0 0.96040-0.87924 0.11534 0.45274 0.27279 0.11325
   1  12   8    2.47    1.19   0 0.95725-0.87480 0.12313 0.44582 0.28100 0.16035
   1  12   9   14.41    1.72   0 0.95325-0.86995 0.13254 0.43565 0.29088 0.20529
   1  13   5   47.40    1.91   0 0.95264-0.87299 0.13393 0.48125 0.29234-0.01521
   1  13   6    0.03    1.69   0 0.95321-0.87153 0.13262 0.48118 0.29097 0.03814
   2  -8  11   59.26    3.66   0 0.94525-0.79556 0.15007-0.52646 0.30922 0.29546
   2  -7  12    0.69    1.85   0 0.95482-0.80442 0.12888-0.45679 0.28705 0.37238
   2  -6  13    0.56    1.73   0 0.95359-0.80183 0.13176-0.41211 0.29007 0.42396
   2  -4  -4    3.30    1.28   0 0.95796-0.82159 0.12140-0.30927 0.27918-0.49701
   2  -3  15   -0.59    1.71   0 0.95233-0.79803 0.13463-0.27010 0.29308 0.52772
   2  -2  15    3.92    1.66   0 0.95748-0.80299 0.12255-0.21472 0.28039 0.54439
   2  -1  -5   96.09    2.42   0 0.95236-0.81567 0.13457-0.17962 0.29301-0.56566
   2  11  -3   40.05    2.49   0 0.94897-0.80640 0.14211 0.37852 0.30091-0.46152
   2  12  -2  136.01    2.81   0 0.95442-0.81067 0.12984 0.43798 0.28805-0.39381
   2  13  -1    1.62    1.58   0 0.95330-0.80779 0.13242 0.48268 0.29076-0.34161
   2  14   1  108.12    2.13   0 0.95784-0.81107 0.12169 0.54044 0.27948-0.22057
   2  14   9   -0.21    1.23   0 0.95819-0.80374 0.12082 0.54338 0.27857 0.21667
   2  15   3    7.94    1.75   0 0.95369-0.80419 0.13152 0.57829 0.28981-0.12085
   2  15   4    1.33    1.68   0 0.95490-0.80558 0.12872 0.58427 0.28687-0.06312
   2  15   5    1.11    1.62   0 0.95480-0.80507 0.12893 0.58718 0.28710-0.00737
   2  15   6    4.79    1.57   0 0.95632-0.80440 0.12536 0.58490 0.28335 0.05002
   2  15   7    1.12    1.86   0 0.95470-0.80115 0.12917 0.58190 0.28735 0.10056
   2  15   8    0.90    1.69   0 0.95169-0.79774 0.13607 0.57543 0.29458 0.14848
   3 -11   1    7.01    1.21   0 0.96029-0.75129 0.11563-0.63364 0.27310-0.21660
   3 -11   2    3.26    1.59   0 0.95190-0.74211 0.13560-0.65423 0.29409-0.18240
   3 -10  -1    0.38    1.15   0 0.96086-0.75302 0.11419-0.58589 0.27157-0.32399
   3  -9  -2   39.55    1.82   0 0.95578-0.74857 0.12664-0.54963 0.28469-0.39262
   3  -8  -3   88.43    2.09   0 0.95436-0.74756 0.12996-0.50542 0.28818-0.45087
   3  -7  -4   71.02    1.69   0 0.95689-0.75113 0.12399-0.45235 0.28191-0.49944
   3  -4  -6   13.52    1.17   0 0.96097-0.75574 0.11390-0.30083 0.27127-0.59767
   3   0  -7   13.40    1.67   0 0.95689-0.75076 0.12399-0.12235 0.28191-0.66274
   3   1  -7   54.59    2.11   0 0.95225-0.74582 0.13482-0.08573 0.29327-0.67370
   3   4  -7   95.11    2.98   0 0.94909-0.74170 0.14184 0.04854 0.30063-0.68053
   3   5  -7   67.18    2.57   0 0.95449-0.74646 0.12967 0.10780 0.28788-0.66760
   3  11  -5    2.92    2.37   0 0.94423-0.73259 0.15219 0.36806 0.31143-0.58004
   3  15  -1   13.98    1.86   0 0.95635-0.74093 0.12528 0.58400 0.28326-0.33235
   3  16   1   46.83    2.07   0 0.95745-0.73981 0.12263 0.63402 0.28047-0.21951
   3  17   3    5.36    1.67   0 0.95118-0.73063 0.13721 0.66756 0.29578-0.12542
   4 -13   3    5.60    1.55   0 0.95713-0.67582 0.12342-0.73512 0.28130-0.11385
   4 -13   4    2.85    1.60   0 0.95339-0.67110 0.13220-0.74426 0.29053-0.06821
   4 -13   5   37.93    2.12   0 0.95104-0.66709 0.13753-0.74988 0.29612-0.01893
   4 -13   6   76.33    2.75   0 0.95169-0.66688 0.13607-0.74839 0.29459 0.03725
   4 -12   0  122.21    2.50   0 0.95631-0.67744 0.12536-0.69021 0.28335-0.28041
   4 -11  -2   73.49    1.73   0 0.95925-0.68236 0.11823-0.63575 0.27584-0.38240
   4 -10  -3  167.31    2.57   0 0.95558-0.67876 0.12711-0.59737 0.28518-0.44670
   4  -9  -4   37.04    1.83   0 0.95463-0.67796 0.12934-0.55217 0.28753-0.50341
   4  -8  -5   -0.64    1.15   0 0.95713-0.68187 0.12342-0.50189 0.28130-0.54927
   4  -5  -7   93.32    1.82   0 0.96017-0.68539 0.11592-0.34998 0.27340-0.65340
   4  -2  -8    0.09    1.28   0 0.95878-0.68402 0.11938-0.21571 0.27705-0.71009
   4  -1  -8   27.97    1.94   0 0.95275-0.67735 0.13368-0.17900 0.29208-0.72629
   4  16  -2   10.87    1.89   0 0.95760-0.67261 0.12226 0.63447 0.28009-0.38174
   5 -14   2    4.44    1.74   0 0.95542-0.60421 0.12748-0.78515 0.28558-0.17147
   5 -14   3    0.48    1.61   0 0.95093-0.59907 0.13779-0.79667 0.29639-0.12785
   5 -13  -1   -0.41    1.24   0 0.95890-0.61119 0.11909-0.73160 0.27675-0.32461
   5 -12  -2   17.14    1.66   0 0.95222-0.60464 0.13488-0.70049 0.29334-0.39895
   5 -11  -4   77.32    1.73   0 0.96017-0.61417 0.11592-0.63345 0.27340-0.48840
   5 -10  -5    1.89    1.20   0 0.95994-0.61400 0.11650-0.58759 0.27401-0.54358
   5  -7  -7   11.96    1.61   0 0.95629-0.61189 0.12543-0.45375 0.28342-0.66213
   5  -5  -8   16.94    1.78   0 0.95584-0.61111 0.12650-0.36075 0.28454-0.71774
   5  -2  -9    8.46    1.76   0 0.95522-0.61004 0.12796-0.22061 0.28608-0.77283
   5   7  -9    2.83    1.78   0 0.95208-0.60344 0.13521 0.19615 0.29368-0.78106
   5  10  -8    6.10    2.71   0 0.93722-0.58695 0.16624 0.30686 0.32603-0.75616
   5  14  -6   -0.03    2.50   0 0.91733-0.56565 0.20179 0.46565 0.36266-0.68569
   6 -15   1   -0.18    1.34   0 0.96052-0.54111 0.11505-0.82106 0.27249-0.20997
   6 -15   2    0.05    1.76   0 0.95464-0.53422 0.12932-0.83409 0.28750-0.17047
   6 -15   3    0.47    1.67   0 0.95015-0.52780 0.13951-0.84505 0.29819-0.12862
   6 -14  -1    9.87    1.68   0 0.95665-0.53769 0.12457-0.78377 0.28251-0.33145
   6 -13  -3    0.15    1.32   0 0.95936-0.54261 0.11794-0.73083 0.27553-0.43183
   6 -12  -4   33.79    1.90   0 0.95591-0.53909 0.12632-0.69109 0.28435-0.49768
   6 -11  -5   -1.75    1.66   0 0.95452-0.53867 0.12960-0.64826 0.28780-0.55336
   6 -10  -6    2.33    1.66   0 0.95523-0.53914 0.12793-0.59721 0.28605-0.60817
   6  -9  -7   16.06    1.32   0 0.95902-0.54420 0.11880-0.54190 0.27644-0.65411
   6  -7  -8   12.43    1.77   0 0.95470-0.53961 0.12916-0.45780 0.28734-0.71910
   6  -5  -9    6.80    1.71   0 0.95604-0.54091 0.12601-0.36066 0.28403-0.77144
   6  -2 -10    1.38    1.32   0 0.95737-0.54213 0.12284-0.21572 0.28069-0.82255
   6  -1 -10    1.77    1.81   0 0.95421-0.53886 0.13032-0.17648 0.28856-0.83375
   6   7 -10   -0.02    1.81   0 0.95525-0.53673 0.12788 0.20176 0.28599-0.82646
   6  10  -9   -0.41    2.38   0 0.94885-0.52840 0.14237 0.33019 0.30118-0.78820
   7 -14  -3    4.70    1.42   0 0.95936-0.47197 0.11794-0.77699 0.27553-0.43271
   7 -13  -4    7.06    1.86   0 0.95501-0.46710 0.12846-0.74004 0.28660-0.49867
   7 -12  -5    5.86    1.75   0 0.95321-0.46572 0.13262-0.69760 0.29097-0.55825
   7 -11  -6   -0.31    1.77   0 0.95377-0.46810 0.13133-0.65148 0.28961-0.61009
   7 -10  -7    5.18    1.80   0 0.95510-0.46917 0.12825-0.59763 0.28638-0.66251
   7  -9  -8    1.61    1.34   0 0.95960-0.47430 0.11736-0.54055 0.27492-0.70669
   7  -7  -9    0.41    1.22   0 0.95701-0.47247 0.12370-0.45502 0.28160-0.76574
   7  -5 -10    4.92    1.35   0 0.95925-0.47541 0.11823-0.35219 0.27584-0.81634
   7  -4 -10    1.34    1.83   0 0.95246-0.46715 0.13434-0.32124 0.29278-0.83350
   7  -1 -11    2.19    1.36   0 0.95819-0.47266 0.12082-0.16609 0.27857-0.87420
   7   0 -11   -0.27    1.75   0 0.95445-0.46896 0.12975-0.13074 0.28795-0.88193
   7   1 -11    2.00    1.72   0 0.95356-0.46745 0.13182-0.08260 0.29013-0.88824
   7   4 -11    0.01    1.76   0 0.95246-0.46471 0.13434 0.05461 0.29278-0.89093
   7   5 -11    1.54    2.09   0 0.95334-0.46580 0.13233 0.10609 0.29067-0.88534
   7   6 -11   -1.04    1.74   0 0.95611-0.46866 0.12586 0.15618 0.28387-0.87600
   8 -11  -7    6.05    2.03   0 0.95468-0.39832 0.12922-0.64553 0.28740-0.66267
   8 -10  -8    4.07    1.40   0 0.95796-0.40217 0.12140-0.59120 0.27918-0.70966
   8  -8  -9    2.29    1.91   0 0.95422-0.39860 0.13029-0.50620 0.28852-0.77448
   8  -6 -10   -0.76    1.77   0 0.95421-0.39929 0.13032-0.41438 0.28856-0.82686
   8  -4 -11    0.81    1.48   0 0.95902-0.40373 0.11880-0.30531 0.27644-0.87080
   8  -3 -11    0.25    1.93   0 0.95421-0.39855 0.13032-0.27004 0.28856-0.88452
   0  -4   7    3.80    1.72   0 0.94327-0.93851 0.15374-0.34116 0.31345 0.06891
   0  -3   9   96.94    2.62   0 0.94465-0.93804 0.15086-0.29111 0.31046 0.18169
   0  -2  10   11.23    1.70   0 0.94571-0.93800 0.14865-0.24148 0.30816 0.23892
   0  -1  11    1.94    1.51   0 0.94212-0.93288 0.15607-0.20207 0.31588 0.28668
   0   0  11    0.17    1.20   0 0.94852-0.93916 0.14264-0.13980 0.30189 0.30081
   0   1  12    2.23    1.59   0 0.94068-0.92934 0.15898-0.11009 0.31891 0.33885
   0   2  12    3.17    1.69   0 0.94321-0.93156 0.15385-0.05761 0.31357 0.34451
   0   3  12    2.67    1.72   0 0.94402-0.93224 0.15217-0.00849 0.31183 0.34648
   0   4  12   19.47    1.74   0 0.94372-0.93183 0.15280 0.03777 0.31247 0.34493
   0   5  11    4.54    1.21   0 0.95138-0.94028 0.13633 0.10178 0.29529 0.30746
   0   5  12    8.91    1.79   0 0.94198-0.92998 0.15636 0.08171 0.31618 0.34174
   0   6   0   -0.21    1.46   0 0.94891-0.94699 0.14178 0.14019 0.30099-0.30091
   0   6  11   33.48    1.44   0 0.94839-0.93714 0.14293 0.14178 0.30219 0.30075
   0   7  11   28.02    1.78   0 0.94458-0.93302 0.15102 0.18097 0.31062 0.29217
   0   8   1   47.18    2.06   0 0.94551-0.94188 0.14906 0.22976 0.30858-0.25362
   0   8  10    0.22    1.13   0 0.94706-0.93582 0.14579 0.23417 0.30517 0.24262
   0   9   2  209.03    2.77   0 0.94592-0.94101 0.14821 0.27800 0.30770-0.19779
   0   9   8   15.46    1.27   0 0.95163-0.94150 0.13576 0.29044 0.29469 0.14440
   0   9   9   21.37    1.35   0 0.94692-0.93626 0.14608 0.28011 0.30547 0.18834
   0   9  10    3.50    1.50   0 0.94202-0.92902 0.15629 0.26938 0.31611 0.23194
   0  10   3    0.59    1.64   0 0.94226-0.93633 0.15579 0.31743 0.31559-0.14989
   0  10   4   71.97    1.70   0 0.94692-0.93991 0.14608 0.32735 0.30547-0.08574
   0  10   5  434.26    3.17   0 0.94878-0.94106 0.14207 0.33142 0.30129-0.02674
   0  10   6    0.22    1.17   0 0.94878-0.94034 0.14207 0.33105 0.30129 0.02724
   0  10   7   21.65    1.23   0 0.94719-0.93771 0.14550 0.32786 0.30488 0.07949
   0  10   8    1.42    1.55   0 0.94365-0.93386 0.15293 0.32153 0.31262 0.12780
   1  -5   0  197.28    3.41   0 0.94326-0.87449 0.15374-0.38780 0.31346-0.31450
   1  -4  -1  158.40    3.25   0 0.94560-0.87733 0.14888-0.33566 0.30840-0.36397
   1  -3  13   20.24    1.87   0 0.94410-0.86307 0.15202-0.29197 0.31167 0.40148
   1  -1  14   10.51    1.74   0 0.94392-0.86104 0.15238-0.19768 0.31205 0.45640
   1   0  -3 1477.82    9.03   0 0.94457-0.87634 0.15103-0.14891 0.31064-0.47470
   1   0  14   -0.38    1.21   0 0.94878-0.86640 0.14207-0.13765 0.30129 0.46710
   1   5  14    0.26    1.38   0 0.95112-0.86682 0.13691 0.10340 0.29589 0.47241
   1   6  14    1.51    1.38   0 0.94852-0.86336 0.14264 0.14379 0.30189 0.46793
   1   7  14   -0.72    1.85   0 0.94448-0.86055 0.15122 0.18387 0.31084 0.45889
   1   8  13    3.29    1.27   0 0.95125-0.86601 0.13662 0.24406 0.29559 0.41926
   1   9  -2  101.23    2.81   0 0.94136-0.86902 0.15761 0.26858 0.31748-0.42510
   1   9  13   -0.26    1.58   0 0.94482-0.86138 0.15051 0.27990 0.31009 0.40628
   1  10  12   24.91    1.56   0 0.94878-0.86454 0.14207 0.33190 0.30129 0.35849
   1  11  11   65.36    1.85   0 0.94931-0.86503 0.14092 0.38081 0.30009 0.30608
   1  11  12    0.30    1.85   0 0.94275-0.85683 0.15479 0.36686 0.31455 0.34285
   1  12   1    2.87    1.20   0 0.94799-0.87229 0.14379 0.42409 0.30308-0.24572
   1  12  10   -0.63    1.30   0 0.94772-0.86441 0.14436 0.42522 0.30368 0.24521
   1  12  11    3.75    1.70   0 0.94365-0.85655 0.15293 0.41295 0.31262 0.28817
   1  13   2    4.89    1.78   0 0.94217-0.86504 0.15597 0.45812 0.31578-0.20342
   1  13   3    5.69    1.31   0 0.94786-0.87010 0.14407 0.47120 0.30338-0.13607
   1  13   4    0.16    1.31   0 0.95125-0.87265 0.13662 0.47820 0.29559-0.07574
   1  13   7   10.43    1.23   0 0.95048-0.86949 0.13834 0.47707 0.29739 0.08942
   1  13   8    1.19    1.20   0 0.94772-0.86531 0.14436 0.47197 0.30368 0.13761
   1  13   9    0.35    1.67   0 0.94393-0.86043 0.15236 0.46389 0.31202 0.18397
   2  -9   2  406.38    4.18   0 0.94796-0.80784 0.14385-0.56724 0.30315-0.19345
   2  -8   0  500.16    3.92   0 0.94931-0.81073 0.14092-0.51680 0.30009-0.29986
   2  -7  -1  241.22    3.09   0 0.94358-0.80547 0.15309-0.48163 0.31279-0.36734
   2  -6  -2   16.84    1.77   0 0.94365-0.80630 0.15293-0.43444 0.31262-0.42162
   2  -5  -3  491.61    3.66   0 0.94865-0.81176 0.14235-0.37632 0.30159-0.46543
   2  -5  14    3.69    1.82   0 0.94684-0.79496 0.14626-0.37976 0.30567 0.46353
   2  -4  15    1.50    1.67   0 0.94303-0.78763 0.15422-0.33800 0.31395 0.50497
   2  -3  -4  365.40    3.60   0 0.94384-0.80693 0.15256-0.29198 0.31223-0.53044
   2   0  -5   -0.35    1.93   0 0.94303-0.80631 0.15422-0.15640 0.31395-0.58547
   2  14   0   23.69    1.83   0 0.94786-0.80197 0.14407 0.51816 0.30338-0.29913
   2  15   1  105.38    2.47   0 0.94035-0.79384 0.15963 0.54960 0.31958-0.25992
   2  15   2   35.40    1.60   0 0.94852-0.80090 0.14264 0.56668 0.30189-0.18796
   2  16   4   15.97    1.88   0 0.94196-0.79140 0.15640 0.60039 0.31623-0.09232
   2  16   5    0.81    1.74   0 0.94379-0.79178 0.15265 0.60483 0.31232-0.03417
   2  16   6    1.19    1.85   0 0.94393-0.79105 0.15236 0.60533 0.31202 0.02094
   3 -11   3  111.80    2.47   0 0.94238-0.73124 0.15555-0.67355 0.31534-0.14946
   3 -11   8   14.65    2.65   0 0.93421-0.71726 0.17156-0.69114 0.33194 0.10811
   3 -10   0   54.09    1.61   0 0.94825-0.73961 0.14321-0.61370 0.30249-0.30104
   3  -6  -4  511.62    3.67   0 0.94165-0.73528 0.15703-0.43824 0.31688-0.53434
   3  -5  -5    2.24    1.14   0 0.95009-0.74415 0.13920-0.37507 0.29829-0.56927
   3  -3  -6  214.04    2.41   0 0.95138-0.74562 0.13633-0.27597 0.29529-0.62167
   3   2  -7    0.24    1.29   0 0.94891-0.74247 0.14178-0.04956 0.30099-0.68061
   3   3  -7   21.33    1.87   0 0.94724-0.74002 0.14541-0.00231 0.30478-0.68463
   3  14  -3    0.20    1.97   0 0.93569-0.72180 0.16875 0.49509 0.32903-0.48901
   3  15  -2   14.61    1.93   0 0.93764-0.72322 0.16498 0.54473 0.32513-0.42846
   3  16   0    7.89    1.42   0 0.94839-0.73217 0.14293 0.61325 0.30219-0.29607
   3  17   2    7.45    1.90   0 0.94618-0.72689 0.14766 0.65722 0.30712-0.19191
   4 -12   1    0.10    1.52   0 0.94517-0.66594 0.14979-0.71223 0.30935-0.24887
   4 -11  -1   86.54    1.83   0 0.94692-0.66852 0.14608-0.66361 0.30547-0.35725
   4 -10  -2   12.64    1.61   0 0.94112-0.66329 0.15809-0.62874 0.31798-0.42523
   4  -7  -5   97.04    2.19   0 0.94356-0.66770 0.15313-0.48143 0.31283-0.58372
   4  -6  -6    9.85    1.26   0 0.95086-0.67576 0.13748-0.41898 0.29649-0.62168
   4  -4  -7   -0.81    1.31   0 0.95086-0.67581 0.13748-0.32808 0.29649-0.67412
   4  -3  -7   49.90    1.89   0 0.94119-0.66552 0.15796-0.29776 0.31785-0.69793
   4   0  -8  110.33    2.09   0 0.94706-0.67133 0.14579-0.14431 0.30517-0.73914
   4   1  -8   24.77    1.89   0 0.94203-0.66586 0.15625-0.10741 0.31607-0.75004
   4   5  -8   17.00    1.86   0 0.93856-0.66119 0.16319 0.07372 0.32327-0.75669
   4   6  -8    0.45    1.69   0 0.94365-0.66530 0.15293 0.13106 0.31262-0.74465
   5 -14   4   29.19    2.11   0 0.94665-0.59335 0.14665-0.80600 0.30607-0.08198
   5 -14   5    5.94    1.88   0 0.94374-0.58977 0.15275-0.81138 0.31243-0.03380
   5 -14   6   38.34    2.23   0 0.94352-0.58789 0.15320-0.81238 0.31290 0.02115
   5 -14   7    1.58    1.85   0 0.94639-0.59107 0.14722-0.80523 0.30667 0.08257
   5 -13   0    0.39    1.22   0 0.94957-0.60089 0.14035-0.75245 0.29949-0.29270
   5 -13   1   20.79    1.72   0 0.94000-0.58958 0.16035-0.77217 0.32032-0.26140
   5 -11  -3    4.49    1.20   0 0.94719-0.59977 0.14550-0.66347 0.30488-0.46477
   5 -10  -4    0.71    1.68   0 0.94544-0.59842 0.14922-0.62024 0.30875-0.52340
   5  -9  -5    5.89    1.14   0 0.94639-0.60040 0.14722-0.57000 0.30667-0.57623
   5  -8  -6   -1.80    1.19   0 0.95009-0.60478 0.13920-0.51769 0.29829-0.61980
   5  -6  -7    1.86    1.68   0 0.94513-0.59930 0.14988-0.43172 0.30944-0.68754
   5  -4  -8    2.45    1.22   0 0.94719-0.60217 0.14550-0.33305 0.30488-0.73805
   5  -1  -9    7.73    1.35   0 0.95009-0.60517 0.13920-0.18519 0.29829-0.78551
   5   0  -9   10.89    1.95   0 0.94462-0.59860 0.15093-0.14984 0.31053-0.79775
   5   1  -9    6.28    1.72   0 0.94042-0.59506 0.15949-0.11105 0.31943-0.80645
   5   6  -9   -0.36    1.70   0 0.94310-0.59528 0.15408 0.12823 0.31381-0.80189
   6 -14   0    1.32    1.28   0 0.94799-0.52801 0.14379-0.80291 0.30308-0.29759
   6 -13  -2   49.97    1.74   0 0.94878-0.53049 0.14207-0.75403 0.30129-0.40483
   6 -12  -3    8.11    1.78   0 0.94345-0.52561 0.15335-0.71828 0.31305-0.47182
   6  -9  -6   26.56    1.81   0 0.94314-0.52744 0.15398-0.57702 0.31371-0.63687
   6  -8  -7   -0.90    1.22   0 0.94799-0.53278 0.14379-0.52241 0.30308-0.67852
   6  -6  -8    2.38    1.63   0 0.94503-0.52934 0.15008-0.43200 0.30965-0.74195
   6  -4  -9    0.02    1.22   0 0.94812-0.53322 0.14350-0.33398 0.30278-0.78826
   6   0 -10    4.29    1.30   0 0.94812-0.53269 0.14350-0.14209 0.30278-0.84388
   6   1 -10    0.42    1.64   0 0.94434-0.52798 0.15151-0.10284 0.31113-0.85223
   6   2 -10    2.78    1.82   0 0.94184-0.52574 0.15664-0.06057 0.31648-0.85739
   6   3 -10    0.42    1.64   0 0.94057-0.52363 0.15921-0.01574 0.31914-0.86037
   6   4 -10    3.86    1.95   0 0.94099-0.52444 0.15835 0.03115 0.31825-0.85915
   6   5 -10    0.61    1.71   0 0.94324-0.52563 0.15379 0.08422 0.31351-0.85447
   6   6 -10    0.11    1.56   0 0.94585-0.52832 0.14836 0.13306 0.30786-0.84620
   6  12  -8    0.13    2.78   0 0.89918-0.47872 0.22974 0.33897 0.39145-0.81544
   7 -14  -2    5.58    1.40   0 0.94957-0.46001 0.14035-0.79949 0.29949-0.40217
   7 -13  -3    3.02    1.86   0 0.94361-0.45496 0.15303-0.76478 0.31271-0.47065
   7  -9  -7    1.14    1.69   0 0.94367-0.45722 0.15291-0.57579 0.31259-0.68924
   7  -8  -8    0.36    1.28   0 0.94957-0.46439 0.14035-0.51893 0.29949-0.72873
   7  -6  -9   14.35    1.36   0 0.94839-0.46370 0.14293-0.42448 0.30219-0.78793
   7  -3 -10    4.09    1.80   0 0.94489-0.45908 0.15038-0.28974 0.30996-0.84901
   7   2 -11   -0.79    1.38   0 0.95035-0.46399 0.13863-0.04535 0.29769-0.89243
   7   3 -11    2.49    1.36   0 0.94957-0.46257 0.14035 0.00318 0.29949-0.89402
   7   9 -10   -0.07    1.88   0 0.94296-0.45284 0.15436 0.27106 0.31410-0.85505
   8 -10  -7    8.45    1.91   0 0.94323-0.38615 0.15380-0.62401 0.31352-0.68949
   8  -9  -8    8.66    1.50   0 0.94759-0.39157 0.14464-0.56803 0.30398-0.73367
   8  -7  -9    0.57    1.76   0 0.94434-0.38825 0.15151-0.47975 0.31113-0.79585
   8  -5 -10    1.19    1.69   0 0.94478-0.38989 0.15061-0.38271 0.31020-0.84597
   8  -2 -11   -0.23    1.47   0 0.94825-0.39256 0.14321-0.23875 0.30249-0.89580
   8  -1 -11   -1.05    1.83   0 0.94345-0.38736 0.15336-0.20153 0.31306-0.90693
  -1   2   5   15.32    1.87   0 0.92984-0.99557 0.17914-0.08488 0.33999-0.06762
  -1   2   6  162.50    2.61   0 0.93208-0.99723 0.17502-0.07988 0.33575-0.00868
  -1   2   7  112.89    2.25   0 0.93143-0.99524 0.17623-0.08193 0.33699 0.04456
  -1   3   5   30.35    1.93   0 0.93317-0.99868 0.17300-0.03008 0.33366-0.06175
  -1   3   6  134.73    2.11   0 0.93505-0.99970 0.16944-0.02649 0.32998-0.00320
  -1   3   7  225.56    2.73   0 0.93360-0.99760 0.17218-0.02928 0.33282 0.04882
  -1   3   8   38.95    1.76   0 0.93047-0.99288 0.17800-0.03762 0.33882 0.09842
  -1   4   5  752.52    4.56   0 0.93343-0.99873 0.17251 0.01763 0.33315-0.06089
  -1   4   6  137.34    2.06   0 0.93520-0.99954 0.16916 0.02107 0.32969-0.00272
  -1   4   7    8.61    1.47   0 0.93395-0.99744 0.17154 0.01828 0.33215 0.05096
  -1   4   8  125.73    2.25   0 0.93072-0.99320 0.17753 0.01038 0.33833 0.09897
  -1   5   5   -1.93    1.67   0 0.93181-0.99668 0.17553 0.06036 0.33627-0.06357
  -1   5   6   79.93    1.96   0 0.93335-0.99745 0.17266 0.06472 0.33331-0.00610
  -1   5   7   50.74    1.83   0 0.93236-0.99563 0.17450 0.06250 0.33521 0.04736
  -1   5   8   32.63    1.71   0 0.92942-0.99174 0.17990 0.05449 0.34077 0.09695
  -1   6   6    3.24    1.56   0 0.93037-0.99382 0.17818 0.10497 0.33900-0.01124
  -1   6   7   16.78    1.60   0 0.92941-0.99238 0.17992 0.10227 0.34079 0.04292
   0  -4   8  104.36    2.87   0 0.93215-0.92619 0.17489-0.36388 0.33561 0.10135
   0  -3  10    0.90    1.63   0 0.93116-0.92286 0.17673-0.31720 0.33750 0.21046
   0  -2  11   43.00    1.90   0 0.93174-0.92236 0.17566-0.27052 0.33640 0.26542
   0  -1  12    2.16    1.54   0 0.92917-0.91773 0.18035-0.22583 0.34124 0.31495
   0   0  12    2.20    1.49   0 0.93513-0.92485 0.16929-0.16776 0.32983 0.32846
   0   2  13    0.49    1.68   0 0.93188-0.91781 0.17539-0.07902 0.33613 0.37490
   0   3  13    0.29    1.81   0 0.93173-0.91943 0.17567-0.03241 0.33642 0.37713
   0   4  13   -0.02    1.74   0 0.93173-0.91945 0.17567 0.01495 0.33642 0.37756
   0   5  13    1.52    1.78   0 0.93179-0.91781 0.17557 0.06234 0.33631 0.37619
   0   6  12    3.49    1.19   0 0.93930-0.92688 0.16120 0.12430 0.32145 0.33718
   0   6  13   -0.62    1.58   0 0.93188-0.91525 0.17539 0.10797 0.33613 0.37173
   0   7   0   -0.30    1.42   0 0.93698-0.93510 0.16575 0.16366 0.32617-0.32634
   0   7  12    1.01    1.14   0 0.93580-0.92299 0.16802 0.16462 0.32852 0.33029
   0   8  11    2.26    1.17   0 0.93973-0.92756 0.16034 0.21945 0.32057 0.28351
   0   8  12   -1.16    1.67   0 0.93165-0.91858 0.17582 0.20417 0.33657 0.32031
   0   9   1   69.50    2.16   0 0.93275-0.92925 0.17378 0.25221 0.33446-0.27941
   0   9  11    4.99    1.52   0 0.93369-0.92173 0.17203 0.25532 0.33266 0.27236
   0  10   2   38.38    1.88   0 0.93367-0.92877 0.17206 0.30118 0.33269-0.22275
   0  10   9    1.63    1.16   0 0.93973-0.92872 0.16034 0.31369 0.32057 0.17394
   0  10  10   10.13    1.54   0 0.93431-0.92258 0.17086 0.30287 0.33145 0.21725
   0  11   3   89.70    2.15   0 0.93023-0.92479 0.17843 0.34111 0.33926-0.17135
   0  11   4   54.67    1.59   0 0.93580-0.92886 0.16802 0.35272 0.32852-0.10865
   0  11   5    9.11    1.19   0 0.93873-0.93084 0.16234 0.35835 0.32263-0.04788
   0  11   6   17.07    1.20   0 0.93930-0.93087 0.16120 0.35906 0.32145 0.00826
   0  11   7   14.89    1.25   0 0.93815-0.92885 0.16347 0.35724 0.32381 0.06043
   0  11   8   28.85    1.36   0 0.93550-0.92537 0.16859 0.35237 0.32910 0.11040
   0  11   9   15.00    1.69   0 0.93199-0.92065 0.17520 0.34474 0.33593 0.15796
   1  -7   4    1.54    1.78   0 0.92982-0.85719 0.17917-0.50869 0.34003-0.12289
   1  -5  12    0.70    1.73   0 0.93000-0.84969 0.17886-0.41329 0.33970 0.31897
   1  -4  13    0.02    1.82   0 0.93188-0.84905 0.17539-0.36110 0.33613 0.37565
   1  -2  -2   61.44    3.07   0 0.93244-0.86418 0.17435-0.26608 0.33505-0.44488
   1  -2  14    4.63    1.63   0 0.93580-0.85304 0.16802-0.26048 0.32852 0.44053
   1   0  15   -2.71    1.77   0 0.93204-0.84889 0.17511-0.17091 0.33584 0.48755
   1   1  15   -0.17    1.33   0 0.93668-0.85288 0.16632-0.11463 0.32675 0.49621
   1   2  15   -0.23    1.34   0 0.93901-0.85503 0.16177-0.06292 0.32204 0.50113
   1   3  15   -0.14    1.25   0 0.94002-0.85573 0.15977-0.01374 0.31998 0.50322
   1   4  15    3.55    1.39   0 0.93988-0.85452 0.16006 0.03166 0.32027 0.50409
   1   7  -3  154.64    4.46   0 0.92402-0.85442 0.18950 0.14394 0.35064-0.51143
   1  11  -1  158.64    2.96   0 0.93161-0.85856 0.17589 0.34471 0.33664-0.38819
   1  12   0   43.68    1.93   0 0.93368-0.85954 0.17203 0.39552 0.33266-0.33058
   1  13   1   43.08    1.96   0 0.93154-0.85609 0.17603 0.43843 0.33678-0.27845
   1  13  10    2.04    1.27   0 0.93858-0.85504 0.16262 0.45397 0.32293 0.22793
   1  14   3   34.11    1.92   0 0.93293-0.85593 0.17344 0.48842 0.33411-0.16738
   1  14   4   21.83    1.45   0 0.93771-0.85981 0.16433 0.49747 0.32469-0.10325
   1  14   5   12.22    1.36   0 0.94002-0.86124 0.15977 0.50212 0.31998-0.04382
   1  14   6    0.29    1.24   0 0.94045-0.86043 0.15892 0.50388 0.31909 0.01010
   1  14   7    1.75    1.23   0 0.93930-0.85817 0.16120 0.50227 0.32145 0.06491
   1  14   8   19.77    1.34   0 0.93698-0.85563 0.16575 0.49640 0.32617 0.11490
   1  14   9   -0.84    1.70   0 0.93188-0.85103 0.17539 0.49025 0.33613 0.16127
   2  -9   3   38.74    2.19   0 0.93385-0.79208 0.17172-0.59562 0.33234-0.16725
   2  -8   1  112.99    2.55   0 0.93042-0.79012 0.17809-0.55413 0.33891-0.28574
   2  -7  13    0.29    2.18   0 0.92451-0.77241 0.18864-0.51665 0.34976 0.36205
   2  -6  14   -1.23    2.14   0 0.92509-0.77389 0.18762-0.46670 0.34872 0.41945
   2   1  -5  140.56    3.01   0 0.93194-0.79454 0.17528-0.12497 0.33602-0.60838
   2   6  -5   14.50    3.09   0 0.90661-0.76723 0.21800 0.06806 0.37974-0.64961
   2  13  -2    0.52    1.67   0 0.92895-0.78555 0.18076 0.43453 0.34166-0.44788
   2  14  -1   10.36    1.86   0 0.93188-0.78722 0.17539 0.48480 0.33613-0.38700
   2  15   0   -1.54    1.70   0 0.92934-0.78225 0.18006 0.52542 0.34094-0.33901
   2  16   2    0.75    1.75   0 0.93188-0.78285 0.17539 0.58071 0.33613-0.22257
   2  16   3   -0.88    1.25   0 0.93742-0.78844 0.16490 0.59235 0.32528-0.15970
   3 -11   4   53.77    2.15   0 0.93319-0.71994 0.17297-0.69120 0.33363-0.11229
   3 -11   5   73.40    2.59   0 0.92667-0.71221 0.18483-0.70373 0.34585-0.07194
   3 -11   7    7.59    2.09   0 0.92355-0.70716 0.19032-0.70974 0.35148 0.03334
   3 -10   1    6.36    1.66   0 0.93344-0.72314 0.17249-0.64305 0.33314-0.27586
   3  -9  -1    1.83    1.11   0 0.93959-0.73045 0.16063-0.58505 0.32086-0.37254
   3  -8  -2   40.79    1.42   0 0.93580-0.72789 0.16802-0.54381 0.32852-0.43617
   3  -7  -3  321.14    2.81   0 0.93654-0.72922 0.16660-0.49515 0.32705-0.48964
   3  -4  -5  497.05    3.46   0 0.93594-0.72962 0.16774-0.35458 0.32822-0.59992
   3  -2  -6  132.56    2.10   0 0.94059-0.73427 0.15864-0.25114 0.31880-0.64486
   3  -1  -6   67.07    2.12   0 0.92944-0.72311 0.17986-0.22326 0.34074-0.66731
   3  13  -4    0.32    2.69   0 0.93073-0.71821 0.17751 0.43476 0.33831-0.55071
   3  16  -1   19.17    1.93   0 0.93307-0.71862 0.17319 0.58334 0.33385-0.38247
   3  17   1   -0.77    1.30   0 0.93829-0.71959 0.16319 0.64117 0.32352-0.26660
   4 -12   2   64.90    1.76   0 0.93639-0.65504 0.16689-0.73189 0.32734-0.21446
   4 -11   0    5.34    1.84   0 0.93318-0.65323 0.17298-0.69098 0.33364-0.33009
   4  -9  -3   18.55    1.33   0 0.93815-0.66038 0.16347-0.58691 0.32381-0.48521
   4  -8  -4   87.94    1.78   0 0.93901-0.66201 0.16177-0.53762 0.32204-0.53805
   4  -5  -6  287.42    2.66   0 0.93815-0.66225 0.16347-0.39764 0.32381-0.64905
   4  -2  -7    8.73    1.72   0 0.93034-0.65446 0.17822-0.26952 0.33904-0.71906
   4   2  -8    1.04    1.26   0 0.93800-0.66130 0.16376-0.06846 0.32411-0.75822
   4   3  -8   62.09    2.30   0 0.93497-0.65824 0.16960-0.02651 0.33015-0.76321
   4   4  -8   33.06    2.07   0 0.93464-0.65767 0.17022 0.02017 0.33079-0.76357
   4  15  -4    0.19    1.77   0 0.93249-0.64792 0.17426 0.53514 0.33496-0.54775
   4  16  -3    1.44    1.62   0 0.93314-0.64795 0.17305 0.58511 0.33372-0.49241
   5 -13   2   44.27    2.17   0 0.93043-0.57796 0.17806-0.79022 0.33888-0.22761
   5 -12  -1   28.17    1.53   0 0.93930-0.58981 0.16120-0.72601 0.32145-0.37172
   5 -11  -2    8.39    1.73   0 0.93202-0.58320 0.17513-0.69241 0.33586-0.44121
   5  -8  -5  166.11    2.45   0 0.93073-0.58374 0.17751-0.55155 0.33831-0.60959
   5  -7  -6    7.56    1.21   0 0.93668-0.59023 0.16632-0.49498 0.32675-0.65093
   5  -5  -7   -0.39    1.64   0 0.93188-0.58548 0.17539-0.40896 0.33613-0.71229
   5  -3  -8   10.28    1.30   0 0.93756-0.59217 0.16461-0.30458 0.32499-0.75766
   5   2  -9    4.45    1.26   0 0.93683-0.59054 0.16603-0.07142 0.32646-0.81386
   5   3  -9   20.95    1.88   0 0.93399-0.58749 0.17146-0.02837 0.33207-0.81843
   5   4  -9   48.97    2.13   0 0.93342-0.58646 0.17252 0.01831 0.33317-0.81916
   5   5  -9   16.95    1.82   0 0.93647-0.58967 0.16672 0.06977 0.32717-0.81374
   6 -14   1   46.20    1.74   0 0.93901-0.51732 0.16177-0.82132 0.32204-0.26071
   6 -14   2    3.10    1.76   0 0.93034-0.50796 0.17822-0.83735 0.33904-0.22405
   6 -13  -1    7.96    1.45   0 0.93698-0.51627 0.16575-0.77757 0.32617-0.37543
   6 -12  -2    0.10    1.56   0 0.92926-0.50962 0.18020-0.74522 0.34108-0.44497
   6 -11  -4    1.81    1.19   0 0.94045-0.52239 0.15892-0.67680 0.31909-0.53252
   6 -10  -5   17.38    1.36   0 0.94031-0.52357 0.15921-0.62932 0.31939-0.58742
   6  -7  -7   14.08    1.32   0 0.93550-0.51890 0.16859-0.49774 0.32910-0.70654
   6  -5  -8   48.71    1.83   0 0.93402-0.51839 0.17139-0.40584 0.33200-0.76354
   6  -3  -9   15.71    1.41   0 0.93988-0.52456 0.16006-0.29996 0.32027-0.80702
   6  -2  -9   28.29    1.96   0 0.93163-0.51612 0.17586-0.26641 0.33661-0.82389
   6   9  -9    1.98    2.09   0 0.91977-0.50033 0.19678 0.22997 0.35810-0.84156
   7 -14  -1    3.20    1.32   0 0.93916-0.44848 0.16148-0.82038 0.32175-0.36972
   7 -14   0   -0.50    1.65   0 0.93019-0.43900 0.17850-0.84135 0.33933-0.33091
   7 -13  -2   -0.24    1.80   0 0.93081-0.44064 0.17737-0.78932 0.33817-0.44102
   7 -12  -4    6.84    1.37   0 0.93973-0.45148 0.16034-0.72490 0.32057-0.53270
   7 -11  -5   14.60    1.35   0 0.93858-0.45097 0.16262-0.68025 0.32293-0.58958
   7 -10  -6   34.47    1.62   0 0.94002-0.45369 0.15977-0.63005 0.31998-0.64148
   7  -8  -7   11.13    1.81   0 0.93065-0.44418 0.17765-0.55140 0.33846-0.71645
   7  -7  -8    4.35    1.31   0 0.93858-0.45316 0.16262-0.49140 0.32293-0.75380
   7  -5  -9    5.34    1.32   0 0.93887-0.45255 0.16205-0.39685 0.32234-0.80797
   7  -4  -9    4.48    1.70   0 0.92926-0.44396 0.18020-0.36671 0.34108-0.82662
   7  -2 -10    9.52    1.46   0 0.93873-0.45373 0.16234-0.25526 0.32263-0.86241
   7  -1 -10    1.20    1.87   0 0.93176-0.44540 0.17562-0.22087 0.33636-0.87594
   7   8 -10   -0.24    1.79   0 0.93034-0.44113 0.17822 0.19994 0.33904-0.88102
   8 -13  -3    2.10    1.80   0 0.93142-0.36995 0.17624-0.79271 0.33700-0.49559
   8 -12  -5    2.02    1.33   0 0.94031-0.38177 0.15921-0.72359 0.31939-0.58544
   8 -11  -6    2.15    1.39   0 0.94045-0.38251 0.15892-0.67598 0.31909-0.63977
   8  -9  -7   -2.42    1.81   0 0.93089-0.37380 0.17723-0.60405 0.33802-0.71293
   8  -8  -8    4.36    1.38   0 0.93609-0.37960 0.16745-0.54284 0.32793-0.75793
   8  -6  -9    0.49    1.63   0 0.93188-0.37712 0.17539-0.45360 0.33613-0.81568
   8  -4 -10   10.00    1.50   0 0.93844-0.38182 0.16291-0.35142 0.32322-0.86257
   8  -3 -10    1.45    1.85   0 0.93019-0.37359 0.17850-0.31804 0.33933-0.87879
   8   0 -11    1.47    1.37   0 0.93858-0.38184 0.16262-0.16044 0.32293-0.91704
   8   1 -11   -1.04    1.71   0 0.93340-0.37753 0.17256-0.12613 0.33321-0.92398
   8   2 -11    1.98    1.86   0 0.93159-0.37449 0.17593-0.07921 0.33668-0.93020
   8   3 -11   -0.30    1.84   0 0.92988-0.37249 0.17907-0.03508 0.33992-0.93351
   8   4 -11    1.49    1.93   0 0.93054-0.37274 0.17787 0.01357 0.33868-0.93376
  -1   1   5    5.05    1.83   0 0.92164-0.98780 0.19338-0.14592 0.35418-0.08314
  -1   1   6    0.09    1.28   0 0.92569-0.99116 0.18633-0.13811 0.34699-0.01931
  -1   1   7   10.14    1.29   0 0.92521-0.98970 0.18718-0.13964 0.34785 0.03410
  -1   1   8  234.40    2.99   0 0.92133-0.98508 0.19391-0.14724 0.35473 0.08168
  -1   1   9    4.94    1.60   0 0.91537-0.97807 0.20389-0.15733 0.36488 0.12674
  -1   2   4   19.07    2.11   0 0.92128-0.98812 0.19401-0.09939 0.35482-0.13749
  -1   2   8  164.12    2.25   0 0.92728-0.99052 0.18351-0.08963 0.34410 0.09274
  -1   2   9   22.12    1.79   0 0.92148-0.98374 0.19366-0.09979 0.35447 0.13703
  -1   3   4   14.73    1.46   0 0.92649-0.99301 0.18492-0.04268 0.34554-0.12787
  -1   3   9   55.18    1.60   0 0.92425-0.98649 0.18887-0.04798 0.34958 0.14248
  -1   3  10   20.86    1.80   0 0.91691-0.97822 0.20136-0.06048 0.36230 0.18452
  -1   4   4    7.03    1.29   0 0.92744-0.99388 0.18323 0.00644 0.34381-0.12559
  -1   4   9  231.42    2.52   0 0.92505-0.98712 0.18746 0.00052 0.34814 0.14416
  -1   4  10   58.76    2.08   0 0.91824-0.97919 0.19914-0.01102 0.36005 0.18730
  -1   5   4   37.74    1.59   0 0.92601-0.99208 0.18577 0.05083 0.34641-0.12793
  -1   5   9    5.86    1.29   0 0.92408-0.98598 0.18916 0.04713 0.34987 0.14275
  -1   5  10   44.35    1.94   0 0.91797-0.97832 0.19959 0.03581 0.36051 0.18743
  -1   6   4  949.12    4.75   0 0.92230-0.98816 0.19226 0.09147 0.35303-0.13442
  -1   6   5  147.48    2.08   0 0.92791-0.99284 0.18238 0.10109 0.34294-0.06946
  -1   6   8   81.34    1.70   0 0.92633-0.98883 0.18520 0.09754 0.34583 0.09215
  -1   6   9   10.62    1.56   0 0.92181-0.98343 0.19310 0.09024 0.35390 0.13846
  -1   6  10   91.80    2.04   0 0.91582-0.97632 0.20317 0.07924 0.36414 0.18368
  -1   7   4  296.53    2.98   0 0.91710-0.98254 0.20104 0.12984 0.36198-0.14307
  -1   7   5    5.37    1.10   0 0.92262-0.98746 0.19169 0.13876 0.35246-0.07957
  -1   7   6    8.38    1.13   0 0.92489-0.98889 0.18775 0.14310 0.34843-0.02007
  -1   7   7   43.31    1.41   0 0.92473-0.98774 0.18803 0.14228 0.34872 0.03490
  -1   7   8   42.28    1.43   0 0.92213-0.98463 0.19254 0.13745 0.35332 0.08491
  -1   7   9    1.37    1.52   0 0.91823-0.97936 0.19916 0.13227 0.36007 0.13260
  -1   8   5   93.34    1.97   0 0.91619-0.98075 0.20255 0.17512 0.36352-0.08961
  -1   8   6   22.23    1.66   0 0.91896-0.98268 0.19794 0.17922 0.35883-0.03064
  -1   8   7    1.95    1.53   0 0.91877-0.98172 0.19825 0.18074 0.35914 0.02404
  -1   8   8   -0.12    1.50   0 0.91799-0.97878 0.19957 0.17846 0.36048 0.07506
   0  -4   9   23.17    2.06   0 0.91893-0.91204 0.19799-0.38770 0.35888 0.13249
   0  -3  11    9.46    1.74   0 0.91445-0.90545 0.20541-0.34810 0.36642 0.23501
   0  -2  12    0.80    1.64   0 0.91548-0.90554 0.20371-0.29705 0.36470 0.29293
   0   0  13    0.54    1.63   0 0.91883-0.90893 0.19816-0.19735 0.35905 0.35520
   0   1  13    0.61    1.09   0 0.92633-0.91499 0.18520-0.13507 0.34583 0.36720
   0   2  14    5.16    1.59   0 0.91545-0.90276 0.20377-0.10931 0.36476 0.40277
   0   3  14   -2.03    1.77   0 0.91841-0.90580 0.19886-0.05358 0.35977 0.40641
   0   4  14    4.50    1.88   0 0.91885-0.90592 0.19812-0.00706 0.35901 0.40901
   0   5  14    2.05    1.74   0 0.91853-0.90518 0.19867 0.03907 0.35957 0.40838
   0   6  14    3.23    1.83   0 0.91740-0.90309 0.20054 0.08466 0.36147 0.40572
   0   7  13    0.78    1.26   0 0.92553-0.91242 0.18662 0.14715 0.34728 0.36557
   0   8   0  458.93    4.08   0 0.92376-0.92205 0.18972 0.18938 0.35045-0.34895
   0   8  13    1.55    1.60   0 0.91947-0.90818 0.19708 0.18467 0.35795 0.35892
   0   9  12   -1.59    1.25   0 0.92553-0.91340 0.18662 0.24214 0.34728 0.30921
   0   9  13    0.44    1.60   0 0.91630-0.90271 0.20237 0.22427 0.36333 0.35002
   0  10   1  453.85    3.86   0 0.91895-0.91580 0.19796 0.27511 0.35884-0.30182
   0  10  11   -0.46    1.31   0 0.92728-0.91549 0.18351 0.29196 0.34410 0.25724
   0  10  12   -2.03    1.82   0 0.91908-0.90695 0.19774 0.27767 0.35862 0.29825
   0  11   2   28.19    1.82   0 0.91962-0.91573 0.19683 0.32314 0.35769-0.24574
   0  11  10    5.45    1.26   0 0.92617-0.91492 0.18549 0.33549 0.34612 0.20258
   0  11  11    2.19    1.77   0 0.91887-0.90781 0.19809 0.32411 0.35898 0.24590
   0  12   3    5.12    1.63   0 0.91669-0.91079 0.20172 0.36488 0.36267-0.19720
   0  12   4    9.49    1.28   0 0.92311-0.91712 0.19085 0.37626 0.35160-0.12998
   0  12   5    2.07    1.17   0 0.92696-0.91930 0.18407 0.38433 0.34468-0.07070
   0  12   6   19.42    1.28   0 0.92823-0.92090 0.18181 0.38466 0.34236-0.01109
   0  12   7   -0.46    1.15   0 0.92775-0.91884 0.18266 0.38599 0.34323 0.03858
   0  12   8    1.01    1.28   0 0.92585-0.91555 0.18605 0.38294 0.34670 0.09179
   0  12   9   -0.27    1.26   0 0.92230-0.91153 0.19226 0.37694 0.35303 0.13832
   0  12  10   -2.49    1.68   0 0.91816-0.90574 0.19929 0.36883 0.36020 0.18579
   0  13   6    2.43    1.64   0 0.91661-0.90805 0.20186 0.41337 0.36282-0.03299
   0  13   7   13.95    1.75   0 0.91692-0.90757 0.20134 0.41309 0.36228 0.02453
   1  -7   5   61.31    3.62   0 0.90190-0.82893 0.22506-0.55501 0.38629-0.11358
   1  -7   9   58.45    4.10   0 0.90277-0.82607 0.22375-0.55496 0.38497 0.10727
   1  -6   2  965.40    7.48   0 0.91979-0.84883 0.19654-0.47814 0.35740-0.24942
   1  -6  11    1.36    1.86   0 0.91917-0.84079 0.19758-0.47947 0.35846 0.24598
   1  -3  14   -0.63    1.58   0 0.91883-0.83880 0.19816-0.34024 0.35905 0.41484
   1  -2  15   -0.69    1.85   0 0.91698-0.83358 0.20125-0.29043 0.36219 0.45899
   1  -1  15    0.51    1.26   0 0.92521-0.84194 0.18718-0.23079 0.34785 0.47614
   1   1  -3  191.76    4.00   0 0.92521-0.85693 0.18718-0.13724 0.34785-0.51185
   1  10  -2  123.65    2.94   0 0.91825-0.84667 0.19912 0.27485 0.36003-0.46573
   1  14   2   31.68    1.57   0 0.92473-0.84976 0.18803 0.47380 0.34872-0.23394
   1  15   3    1.32    1.79   0 0.91630-0.83895 0.20237 0.50744 0.36333-0.19665
   1  15   4    1.74    1.96   0 0.92200-0.84380 0.19277 0.51826 0.35356-0.13305
   1  15   5   -1.14    1.44   0 0.92585-0.84660 0.18605 0.52396 0.34670-0.07407
   1  15   6    0.09    1.28   0 0.92712-0.84712 0.18379 0.52666 0.34439-0.01692
   1  15   7    0.39    1.32   0 0.92665-0.84591 0.18464 0.52629 0.34525 0.03709
   1  15   8   -0.62    1.35   0 0.92473-0.84320 0.18803 0.52331 0.34872 0.08848
   2  -9   4    4.22    1.70   0 0.91895-0.77581 0.19795-0.62260 0.35884-0.13907
   2  -7   0   99.35    2.50   0 0.91883-0.77928 0.19816-0.52656 0.35905-0.35951
   2  -5  -2  267.63    3.22   0 0.91855-0.78043 0.19863-0.43192 0.35952-0.46915
   2  -4  -3  165.00    2.42   0 0.92854-0.79085 0.18124-0.36714 0.34178-0.50596
   2  -2  -4   17.13    1.48   0 0.92681-0.78957 0.18436-0.27582 0.34496-0.56323
   2   2  -5    3.63    1.93   0 0.92077-0.78288 0.19487-0.09850 0.35570-0.62750
   2   3  -5   58.26    2.85   0 0.91131-0.77341 0.21047-0.06629 0.37155-0.64316
   2  10  -4    2.41    1.97   0 0.91904-0.77853 0.19781 0.27643 0.35869-0.57318
   2  12  -3    5.37    1.80   0 0.91880-0.77742 0.19821 0.36939 0.35910-0.51765
   2  16   1   -2.75    1.82   0 0.91924-0.77249 0.19746 0.55954 0.35834-0.30352
   2  17   3   -5.36    1.94   0 0.91908-0.77013 0.19774 0.60679 0.35862-0.19425
   2  17   4   -1.14    1.36   0 0.92473-0.77471 0.18803 0.61673 0.34872-0.13022
   3 -11   6   18.46    2.04   0 0.92171-0.70626 0.19326-0.71178 0.35406-0.02318
   3 -10   2  207.35    3.05   0 0.91825-0.70708 0.19913-0.66992 0.36004-0.24985
   3  -9   0  240.18    2.93   0 0.92040-0.71020 0.19551-0.61847 0.35635-0.35562
   3  -5  -4  618.12    3.84   0 0.92295-0.71568 0.19113-0.42423 0.35189-0.56975
   3  -3  -5    8.33    1.65   0 0.91909-0.71229 0.19772-0.33749 0.35860-0.62929
   3   0  -6   -0.34    1.67   0 0.91790-0.71108 0.19971-0.20215 0.36062-0.68610
   3  17   0   -1.75    1.45   0 0.92537-0.70771 0.18690 0.61702 0.34756-0.34725
   4 -12   3    1.51    1.25   0 0.92633-0.64390 0.18520-0.75049 0.34583-0.17715
   4 -12   4  153.80    2.91   0 0.91763-0.63417 0.20017-0.76595 0.36109-0.13968
   4 -12   9    1.31    2.20   0 0.91403-0.62640 0.20609-0.77019 0.36711 0.12950
   4 -11   1  167.39    2.71   0 0.91851-0.63760 0.19869-0.71653 0.35959-0.30286
   4 -10  -1   29.94    1.47   0 0.92344-0.64381 0.19028-0.66037 0.35102-0.40374
   4  -9  -2    1.10    1.63   0 0.91782-0.63863 0.19985-0.62377 0.36077-0.46650
   4  -8  -3   -0.51    1.55   0 0.91790-0.64022 0.19971-0.57950 0.36062-0.51928
   4  -7  -4   -0.52    1.59   0 0.91949-0.64225 0.19704-0.52794 0.35791-0.56996
   4  -6  -5  143.93    2.08   0 0.92728-0.65029 0.18351-0.46364 0.34410-0.61550
   4  -4  -6    5.92    1.20   0 0.92376-0.64788 0.18972-0.37642 0.35045-0.67502
   4  -1  -7  109.28    2.35   0 0.91869-0.64226 0.19839-0.24266 0.35929-0.73870
   4   9  -7   12.63    2.72   0 0.89559-0.61510 0.23440 0.19169 0.39568-0.77330
   4  14  -5   -1.54    2.66   0 0.90344-0.62213 0.22273 0.44359 0.38394-0.65186
   5 -13   3   15.41    1.96   0 0.92032-0.56647 0.19563-0.80780 0.35648-0.18800
   5 -12   0    0.96    1.24   0 0.92585-0.57528 0.18605-0.75147 0.34670-0.34055
   5 -11  -1   13.31    1.68   0 0.91545-0.56522 0.20377-0.72123 0.36476-0.41602
   5 -10  -3    1.50    1.13   0 0.92823-0.57966 0.18181-0.65362 0.34236-0.50098
   5  -9  -4   22.22    1.37   0 0.92760-0.58000 0.18294-0.60493 0.34352-0.55916
   5  -6  -6  158.09    2.45   0 0.92135-0.57458 0.19388-0.47389 0.35469-0.67929
   5  -4  -7  149.90    2.54   0 0.91970-0.57282 0.19669-0.38221 0.35755-0.73635
   5  -2  -8   20.69    1.44   0 0.92791-0.58213 0.18238-0.27398 0.34294-0.77624
   5  -1  -8    9.78    1.77   0 0.91816-0.57259 0.19929-0.24406 0.36020-0.79300
   5   9  -8    1.98    2.23   0 0.90667-0.55722 0.21778 0.20973 0.37894-0.81106
   6 -14   3   33.10    2.14   0 0.92135-0.49650 0.19389-0.85288 0.35470-0.18453
   6 -14   4   18.13    1.89   0 0.91472-0.48984 0.20497-0.86448 0.36597-0.14101
   6 -13   0    8.59    1.34   0 0.92473-0.50299 0.18803-0.79992 0.34872-0.34317
   6 -11  -3    1.47    1.22   0 0.92408-0.50498 0.18916-0.70765 0.34987-0.50717
   6 -10  -4    1.16    1.20   0 0.92230-0.50375 0.19226-0.66367 0.35303-0.56521
   6  -9  -5    9.11    1.21   0 0.92376-0.50587 0.18972-0.61230 0.35045-0.61927
   6  -8  -6   76.16    1.76   0 0.92807-0.51067 0.18209-0.55665 0.34265-0.66649
   6  -6  -7    3.18    1.53   0 0.92181-0.50523 0.19310-0.47495 0.35390-0.73100
   6  -4  -8   11.61    1.32   0 0.92246-0.50616 0.19197-0.37782 0.35275-0.78513
   6  -1  -9   13.91    1.46   0 0.92327-0.50732 0.19057-0.23553 0.35131-0.83804
   6   0  -9    0.81    1.68   0 0.91798-0.49990 0.19958-0.19942 0.36050-0.85158
   7 -14   1   -0.53    1.80   0 0.91748-0.42454 0.20041-0.85947 0.36134-0.29970
   7 -13  -1   10.39    1.92   0 0.91716-0.42637 0.20094-0.81245 0.36188-0.41036
   7 -12  -3   10.70    1.41   0 0.92473-0.43565 0.18803-0.75234 0.34872-0.50578
   7 -11  -4    1.55    1.54   0 0.92181-0.43274 0.19310-0.71130 0.35390-0.56480
   7 -10  -5    3.46    1.54   0 0.92023-0.43244 0.19579-0.66354 0.35664-0.62086
   7  -9  -6   16.01    1.41   0 0.92473-0.43708 0.18803-0.61023 0.34872-0.67072
   7  -7  -7    1.30    1.52   0 0.91671-0.42856 0.20169-0.53150 0.36264-0.73986
   7  -6  -8    4.60    1.32   0 0.92649-0.44000 0.18492-0.46678 0.34554-0.77621
   7  -3  -9    8.40    1.81   0 0.91883-0.43273 0.19816-0.33743 0.35905-0.84422
   7   0 -10    0.99    1.25   0 0.92585-0.43876 0.18605-0.18555 0.34670-0.88687
   7   1 -10   -0.64    1.64   0 0.91966-0.43259 0.19676-0.15127 0.35762-0.89619
   7   2 -10    7.33    1.83   0 0.91579-0.42873 0.20321-0.10632 0.36419-0.90428
   7   6 -10    7.89    1.81   0 0.91356-0.42459 0.20685 0.07671 0.36788-0.90844
   7   7 -10    0.12    1.79   0 0.91832-0.42942 0.19901 0.13370 0.35991-0.89929
   8 -12  -4    1.90    1.40   0 0.92521-0.36562 0.18718-0.75235 0.34785-0.55760
   8 -11  -5    6.54    1.31   0 0.92392-0.36488 0.18944-0.70680 0.35016-0.61516
   8 -10  -6    1.92    1.36   0 0.92553-0.36708 0.18662-0.65755 0.34728-0.66667
   8  -7  -8    0.51    1.30   0 0.92360-0.36658 0.19000-0.52229 0.35073-0.77782
   8  -5  -9   11.81    1.34   0 0.92360-0.36733 0.19000-0.42337 0.35073-0.83554
   8  -2 -10   11.10    1.76   0 0.92184-0.36601 0.19304-0.28512 0.35383-0.89263
   9  -9  -7    4.17    1.86   0 0.91834-0.28941 0.19898-0.62215 0.35989-0.73423
   9  -6  -9   -1.30    1.31   0 0.92230-0.29493 0.19226-0.47733 0.35303-0.83397
   9  -3 -10   -0.36    2.05   0 0.91698-0.28908 0.20125-0.34035 0.36219-0.90034
  -1   0   5  166.73    3.09   0 0.90664-0.97282 0.21935-0.21824 0.37938-0.10811
  -1   0   6   -0.11    1.33   0 0.91413-0.97938 0.20743-0.20608 0.36739-0.03967
  -1   0   7   11.81    1.35   0 0.91499-0.97930 0.20603-0.20508 0.36598 0.01507
  -1   0   8    0.22    1.19   0 0.91205-0.97553 0.21080-0.20856 0.37078 0.06636
  -1   0   9  132.00    2.58   0 0.90586-0.96837 0.22056-0.21970 0.38060 0.11031
  -1   1   4  935.50    5.95   0 0.91065-0.97739 0.21304-0.16458 0.37304-0.15624
  -1   1  10    1.13    1.68   0 0.90558-0.96835 0.22099-0.17295 0.38103 0.16772
  -1   2   3  638.87    5.26   0 0.90371-0.97106 0.22387-0.12792 0.38392-0.22194
  -1   2  10   -0.09    1.18   0 0.91396-0.97504 0.20771-0.11025 0.36768 0.17852
  -1   2  11    3.67    1.80   0 0.90421-0.96413 0.22311-0.12796 0.38315 0.21838
  -1   3   3  691.81    4.90   0 0.91275-0.97980 0.20967-0.06676 0.36965-0.20732
  -1   3  11    8.16    1.73   0 0.90799-0.96792 0.21724-0.07444 0.37727 0.22461
  -1   4   3  341.00    3.37   0 0.91584-0.98268 0.20462-0.01452 0.36456-0.20206
  -1   4  11   -0.52    1.21   0 0.91012-0.96975 0.21388-0.02162 0.37388 0.22671
  -1   5   3  713.20    4.49   0 0.91516-0.98183 0.20574 0.03152 0.36569-0.20300
  -1   5  11   49.42    1.60   0 0.91012-0.96922 0.21388 0.02292 0.37388 0.22785
  -1   6   3   31.16    1.49   0 0.91205-0.97838 0.21080 0.07377 0.37078-0.20782
  -1   6  11    0.28    1.52   0 0.90871-0.96737 0.21611 0.07002 0.37613 0.22537
  -1   7   3  155.45    2.48   0 0.90652-0.97278 0.21954 0.11217 0.37957-0.21631
  -1   7  10    0.13    1.16   0 0.91292-0.97272 0.20939 0.12406 0.36937 0.17606
  -1   7  11    3.67    1.69   0 0.90535-0.96436 0.22134 0.11112 0.38138 0.22121
  -1   8   4   35.26    1.33   0 0.91065-0.97556 0.21304 0.16565 0.37304-0.15459
  -1   8   9   14.05    1.25   0 0.91396-0.97417 0.20771 0.17105 0.36768 0.12463
  -1   8  10    2.46    1.49   0 0.90785-0.96782 0.21746 0.16342 0.37749 0.17040
  -1   9   4   62.66    1.89   0 0.90221-0.96681 0.22614 0.20031 0.38619-0.16803
  -1   9   5   95.22    2.08   0 0.90869-0.97276 0.21615 0.20983 0.37617-0.10290
  -1   9   6    0.99    1.09   0 0.91222-0.97481 0.21051 0.21615 0.37050-0.04316
  -1   9   7   34.41    1.33   0 0.91257-0.97477 0.20995 0.21602 0.36994 0.01293
  -1   9   8   -1.34    1.17   0 0.91118-0.97222 0.21220 0.21485 0.37219 0.06332
  -1   9   9   -1.24    1.58   0 0.90666-0.96834 0.21932 0.20863 0.37936 0.11253
  -1   9  10    0.60    1.61   0 0.90510-0.96127 0.22174 0.20412 0.38178 0.16311
  -1  10   6   28.43    1.77   0 0.90418-0.96601 0.22315 0.25035 0.38319-0.05499
  -1  10   7    5.55    1.53   0 0.90537-0.96631 0.22132 0.25162 0.38136 0.00078
  -1  10   8   39.42    1.81   0 0.90427-0.96418 0.22301 0.25046 0.38305 0.05458
   0  -4  10   55.00    2.34   0 0.90416-0.89580 0.22318-0.41113 0.38323 0.16379
   0  -1  13   -0.89    1.27   0 0.91188-0.90047 0.21108-0.25334 0.37107 0.34079
   0   0  14    3.14    1.67   0 0.90463-0.89087 0.22246-0.21962 0.38250 0.38434
   0   1  14    0.23    1.19   0 0.91118-0.89863 0.21220-0.15975 0.37219 0.39454
   0   3  15   13.76    1.96   0 0.90314-0.88790 0.22473-0.08133 0.38478 0.43805
   0   4  -1    7.48    2.51   0 0.91153-0.91162 0.21164-0.02191 0.37163-0.42641
   0   4  15    1.76    1.96   0 0.90477-0.88959 0.22225-0.03121 0.38229 0.44050
   0   5  -1    0.94    1.54   0 0.91153-0.91094 0.21164 0.02440 0.37163-0.42711
   0   6  -1 1803.85    9.80   0 0.90545-0.90466 0.22119 0.06391 0.38123-0.43597
   0   7  14    1.27    1.36   0 0.91464-0.89958 0.20659 0.12804 0.36654 0.40072
   0   9   0   -0.21    1.18   0 0.91012-0.90772 0.21388 0.21015 0.37388-0.37545
   0  11   1   19.95    1.77   0 0.90514-0.90079 0.22167 0.29831 0.38172-0.32578
   0  11  12   -0.23    1.33   0 0.91275-0.89885 0.20967 0.31401 0.36965 0.28578
   0  12   2   23.98    1.87   0 0.90563-0.90084 0.22092 0.34642 0.38096-0.26990
   0  12  11    4.30    1.49   0 0.91205-0.89817 0.21080 0.35929 0.37078 0.23157
   0  13   3    9.93    1.70   0 0.90228-0.89573 0.22605 0.38906 0.38609-0.22084
   0  13   4   65.76    1.78   0 0.90995-0.90354 0.21415 0.40065 0.37416-0.15318
   0  13   5   11.32    1.28   0 0.91499-0.90728 0.20603 0.40870 0.36598-0.09084
   0  13   8    1.11    1.21   0 0.91584-0.90464 0.20462 0.41208 0.36456 0.07339
   0  13   9    3.08    1.40   0 0.91275-0.90063 0.20967 0.40731 0.36965 0.12312
   0  13  10    2.36    1.59   0 0.90787-0.89525 0.21743 0.40030 0.37746 0.17083
   0  14   6    1.00    1.80   0 0.90423-0.89485 0.22307 0.43987 0.38311-0.05303
   0  14   7   13.53    1.79   0 0.90548-0.89535 0.22115 0.44017 0.38119 0.00352
   0  14   8   -0.05    1.66   0 0.90467-0.89287 0.22239 0.44028 0.38243 0.05391
   1  -5   1   79.89    2.79   0 0.90367-0.83374 0.22392-0.45820 0.38397-0.32998
   1  -5  13    1.07    1.77   0 0.90331-0.82141 0.22448-0.45930 0.38452 0.32882
   1  -4  14    1.41    1.76   0 0.90469-0.82173 0.22236-0.40919 0.38241 0.38604
   1  -3  -1  288.98    4.00   0 0.91118-0.84229 0.21220-0.35164 0.37219-0.42760
   1  -3  15    0.32    1.74   0 0.90549-0.81944 0.22114-0.35700 0.38118 0.43692
   1   8  -3   78.71    3.23   0 0.89629-0.82609 0.23495 0.14423 0.39499-0.55744
   1  12  -1    1.71    1.55   0 0.90874-0.83611 0.21606 0.35236 0.37608-0.43024
   1  13   0   35.01    1.50   0 0.91430-0.84098 0.20715 0.40785 0.36711-0.36389
   1  14   1   35.51    1.57   0 0.91240-0.83837 0.21023 0.45175 0.37022-0.31173
   1  15   2    1.02    1.65   0 0.90693-0.83004 0.21890 0.49119 0.37894-0.26888
   1  16   4   17.33    1.88   0 0.90632-0.82857 0.21985 0.53655 0.37989-0.15728
   1  16   5   -0.09    1.28   0 0.91083-0.83087 0.21276 0.54502 0.37276-0.10091
   1  16   6    0.59    1.31   0 0.91327-0.83227 0.20883 0.54912 0.36881-0.04219
   1  16   7    0.15    1.39   0 0.91327-0.83176 0.20883 0.55005 0.36881 0.01275
   2  -9   5   36.47    2.26   0 0.90502-0.76158 0.22186-0.64552 0.38190-0.10699
   2  -9   8   19.97    3.23   0 0.87347-0.72554 0.26639-0.69156 0.42616 0.01278
   2  -8   2    2.44    1.79   0 0.90729-0.76597 0.21835-0.59507 0.37838-0.26753
   2  -8  12   10.07    2.82   0 0.89416-0.74275 0.23805-0.61471 0.39808 0.26033
   2  -6  -1  667.23    4.47   0 0.91550-0.77677 0.20518-0.48640 0.36513-0.41945
   2  -3  -3   54.16    2.27   0 0.90410-0.76651 0.22328-0.36299 0.38332-0.54653
   2  -1  -4   92.96    2.53   0 0.90645-0.76915 0.21964-0.26474 0.37967-0.59727
   2   4  -5   56.78    2.75   0 0.90331-0.76510 0.22448-0.03445 0.38453-0.65638
   2   5  -5   21.88    2.60   0 0.89993-0.76116 0.22957 0.00765 0.38962-0.66148
   2  14  -2   14.56    1.82   0 0.90379-0.75990 0.22375 0.43778 0.38379-0.48888
   2  15  -1    1.14    1.79   0 0.90603-0.76100 0.22030 0.48909 0.38034-0.43352
   2  16   0   18.29    1.93   0 0.90529-0.75978 0.22145 0.53459 0.38149-0.37600
   2  17   2   -2.14    1.46   0 0.91083-0.76234 0.21276 0.59171 0.37276-0.26452
   3 -10   3   10.00    1.76   0 0.90201-0.69021 0.22646-0.69725 0.38651-0.21975
   3  -8  -1   20.67    1.28   0 0.91327-0.70412 0.20883-0.58461 0.36881-0.42181
   3  -7  -2  155.30    2.16   0 0.91153-0.70337 0.21164-0.54026 0.37163-0.47954
   3  -6  -3    0.94    1.13   0 0.91481-0.70689 0.20631-0.48977 0.36626-0.52712
   3   1  -6   63.36    2.23   0 0.90448-0.69757 0.22268-0.17427 0.38273-0.70824
   3   8  -6   -0.06    2.50   0 0.86717-0.65786 0.27446 0.10325 0.43409-0.75655
   3  15  -3   32.44    2.30   0 0.90517-0.69243 0.22162 0.48797 0.38166-0.53882
   3  16  -2   -1.90    1.73   0 0.90675-0.69188 0.21918 0.53808 0.37922-0.48795
   3  17  -1   -2.31    1.98   0 0.90594-0.68947 0.22044 0.58381 0.38048-0.43421
   4 -12   5   21.30    1.90   0 0.90929-0.62433 0.21520-0.77996 0.37522-0.09661
   4 -12   6   26.11    2.00   0 0.90499-0.61977 0.22191-0.78725 0.38195-0.04890
   4 -12   7   13.34    2.03   0 0.90358-0.61735 0.22406-0.78982 0.38411 0.00413
   4 -12   8    0.25    1.87   0 0.90614-0.61891 0.22013-0.78511 0.38017 0.06347
   4 -11   2   16.77    1.74   0 0.90359-0.62220 0.22406-0.74224 0.38410-0.27090
   4 -10   0   30.53    1.87   0 0.90517-0.62554 0.22163-0.69247 0.38167-0.37803
   4  -5  -5   33.53    1.48   0 0.90977-0.63331 0.21443-0.44842 0.37445-0.64494
   4  -3  -6    0.12    1.57   0 0.90871-0.63194 0.21611-0.35820 0.37613-0.70060
   4   0  -7    0.93    1.67   0 0.90743-0.63078 0.21813-0.21824 0.37816-0.75686
   5 -13   4   15.46    1.46   0 0.91257-0.55804 0.20995-0.82201 0.36994-0.14477
   5 -13   5    9.00    1.81   0 0.90576-0.55008 0.22071-0.83327 0.38075-0.10058
   5 -13   6    1.80    1.60   0 0.90206-0.54572 0.22637-0.83989 0.38642-0.05203
   5 -13   7   20.75    1.92   0 0.89888-0.54208 0.23114-0.84317 0.39119-0.00066
   5 -13   8    3.90    1.93   0 0.90213-0.54401 0.22627-0.83914 0.38632 0.05800
   5 -12   1    3.71    1.27   0 0.91257-0.56127 0.20995-0.77521 0.36994-0.30907
   5 -10  -2    8.68    1.21   0 0.90942-0.56010 0.21499-0.68598 0.37501-0.47990
   5  -9  -3  111.20    2.25   0 0.90649-0.55793 0.21959-0.64287 0.37963-0.53937
   5  -8  -4  218.03    2.66   0 0.90788-0.56024 0.21742-0.59328 0.37744-0.59197
   5  -7  -5   27.35    1.40   0 0.91327-0.56668 0.20883-0.53752 0.36881-0.63789
   5  -5  -6    5.73    1.76   0 0.90536-0.55873 0.22133-0.45672 0.38137-0.70474
   5  -3  -7    1.23    1.76   0 0.90576-0.55918 0.22071-0.36147 0.38075-0.75785
   5   0  -8    2.09    1.72   0 0.90761-0.56111 0.21785-0.21753 0.37787-0.80949
   6 -14   5   21.13    1.93   0 0.90935-0.48296 0.21510-0.87430 0.37512-0.09304
   6 -14   6    4.15    1.86   0 0.90570-0.47933 0.22080-0.87954 0.38084-0.04431
   6 -13   1    0.67    1.13   0 0.91292-0.49073 0.20939-0.82174 0.36937-0.30723
   6 -12  -1    3.43    1.31   0 0.91447-0.49378 0.20687-0.77230 0.36683-0.41485
   6 -11  -2   -1.16    1.61   0 0.90603-0.48691 0.22030-0.73856 0.38034-0.48032
   6 -10  -3   17.61    1.62   0 0.90308-0.48460 0.22483-0.69599 0.38488-0.54302
   6  -9  -4   44.95    1.79   0 0.90239-0.48441 0.22587-0.64952 0.38592-0.59858
   6  -8  -5   90.45    2.17   0 0.90561-0.48818 0.22094-0.59723 0.38098-0.64844
   6  -7  -6   45.33    1.52   0 0.91257-0.49596 0.20995-0.53911 0.36994-0.69243
   6  -5  -7   44.13    1.95   0 0.90757-0.49144 0.21790-0.45266 0.37793-0.75496
   6  -3  -8   43.40    1.61   0 0.91100-0.49557 0.21248-0.35288 0.37248-0.80402
   6   1  -9   12.91    1.97   0 0.90805-0.49180 0.21715-0.16930 0.37717-0.86333
   6   2  -9   25.74    1.99   0 0.90111-0.48458 0.22781-0.13311 0.38786-0.87348
   6   7  -9    2.22    1.96   0 0.89644-0.47831 0.23474 0.09605 0.39478-0.88056
   6   8  -9    0.53    1.84   0 0.90682-0.48827 0.21907 0.15944 0.37910-0.86548
   7 -14   2    8.16    1.91   0 0.90729-0.41395 0.21835-0.87719 0.37838-0.26009
   7 -13   0    7.50    1.82   0 0.90399-0.41195 0.22343-0.83624 0.38348-0.37582
   7 -12  -2    3.56    1.34   0 0.90924-0.41877 0.21527-0.78064 0.37529-0.47649
   7 -11  -3   13.02    1.72   0 0.90459-0.41571 0.22251-0.74092 0.38256-0.53925
   7 -10  -4   18.42    1.66   0 0.90239-0.41436 0.22587-0.69634 0.38592-0.59719
   7  -9  -5   10.78    1.65   0 0.90404-0.41648 0.22336-0.64742 0.38341-0.64899
   7  -8  -6   20.63    1.77   0 0.90872-0.42132 0.21610-0.59215 0.37612-0.69727
   7  -5  -8    0.88    1.25   0 0.91447-0.42769 0.20687-0.44297 0.36683-0.79743
   7  -2  -9    4.09    1.67   0 0.90885-0.42279 0.21589-0.30988 0.37591-0.86025
   7   3 -10    1.10    1.29   0 0.91292-0.42578 0.20939-0.06771 0.36937-0.90982
   7   4 -10    3.02    1.69   0 0.90966-0.42270 0.21462-0.02545 0.37463-0.91319
   7   5 -10    4.87    1.72   0 0.91054-0.42331 0.21321 0.02282 0.37321-0.91276
   8 -13  -2    5.89    1.42   0 0.91550-0.35497 0.20518-0.81706 0.36513-0.46551
   8 -12  -3   -0.58    1.30   0 0.90977-0.35029 0.21443-0.78132 0.37445-0.52702
   8 -11  -4   -1.48    1.74   0 0.90612-0.34728 0.22016-0.73889 0.38020-0.58729
   8 -10  -5    2.14    1.76   0 0.90601-0.34706 0.22033-0.69004 0.38037-0.64450
   8  -9  -6   -0.38    1.33   0 0.90995-0.35228 0.21415-0.64068 0.37416-0.69132
   8  -8  -7   -0.06    1.35   0 0.91584-0.35878 0.20462-0.58439 0.36456-0.73671
   8  -6  -8    2.18    1.21   0 0.91100-0.35370 0.21248-0.49535 0.37248-0.80164
   8  -4  -9    0.06    1.36   0 0.91309-0.35661 0.20911-0.40079 0.36909-0.85170
   8  -3  -9   21.55    1.81   0 0.90207-0.34527 0.22636-0.36814 0.38641-0.87068
   8  -1 -10    3.90    1.44   0 0.91447-0.35895 0.20687-0.25427 0.36683-0.90520
   8   0 -10   -0.52    1.92   0 0.90639-0.34963 0.21974-0.22173 0.37978-0.91709
   9 -10  -6    0.36    1.41   0 0.91447-0.28625 0.20687-0.68018 0.36683-0.68266
   9  -8  -7   -0.28    1.92   0 0.90449-0.27628 0.22267-0.60300 0.38271-0.75550
   9  -7  -8    1.26    1.38   0 0.91205-0.28420 0.21080-0.54060 0.37078-0.79879
   9  -5  -9   -1.58    1.31   0 0.91170-0.28460 0.21136-0.45012 0.37135-0.85295
   9  -2 -10    5.54    1.81   0 0.90889-0.28200 0.21583-0.31026 0.37585-0.91377
  -1  -1   6   -0.29    1.86   0 0.89192-0.95728 0.24147-0.28853 0.40072-0.07300
  -1  -1   7   10.28    1.35   0 0.89613-0.96100 0.23540-0.28142 0.39467-0.01334
  -1  -1   8  231.48    3.24   0 0.89518-0.95894 0.23678-0.28272 0.39604 0.04004
  -1  -1   9    2.50    1.73   0 0.89026-0.95262 0.24384-0.29037 0.40307 0.08809
  -1   0   4    0.09    2.02   0 0.88901-0.95547 0.24560-0.24570 0.40482-0.18721
  -1   0  10   -0.51    1.11   0 0.89726-0.95884 0.23374-0.23212 0.39302 0.15346
  -1   0  11   42.91    1.94   0 0.88621-0.94703 0.24949-0.24869 0.40869 0.19234
  -1   1  11    8.52    1.40   0 0.89726-0.95759 0.23374-0.18515 0.39302 0.20809
  -1   2  12    2.95    1.74   0 0.89250-0.95167 0.24065-0.14530 0.39990 0.25658
  -1   3  12    3.75    1.32   0 0.89726-0.95612 0.23374-0.09089 0.39302 0.26352
  -1   4   2   10.70    2.06   0 0.89211-0.95987 0.24120-0.05126 0.40045-0.29305
  -1   4  12   19.03    1.44   0 0.89969-0.95839 0.23014-0.03973 0.38942 0.26682
  -1   4  13    0.23    1.75   0 0.88901-0.94579 0.24560-0.05456 0.40482 0.30465
  -1   5   2   61.67    1.87   0 0.89442-0.96197 0.23789-0.00061 0.39715-0.28953
  -1   5  12    9.54    1.40   0 0.90025-0.95850 0.22931 0.00816 0.38859 0.26838
  -1   5  13    2.33    1.76   0 0.88929-0.94623 0.24520-0.00786 0.40443 0.30723
  -1   6   2    9.79    1.77   0 0.89235-0.96000 0.24086 0.04377 0.40011-0.29204
  -1   6  12    7.87    1.28   0 0.89913-0.95770 0.23097 0.05387 0.39025 0.26537
  -1   6  13   -1.15    1.77   0 0.88842-0.94553 0.24642 0.03823 0.40564 0.30651
  -1   7   2  228.89    2.92   0 0.88893-0.95554 0.24571 0.08583 0.40494-0.29673
  -1   7  12    0.56    1.19   0 0.89669-0.95461 0.23457 0.09755 0.39384 0.26348
  -1   7  13    3.99    1.59   0 0.88738-0.94332 0.24787 0.08359 0.40708 0.30384
  -1   8   3   78.18    1.66   0 0.89951-0.96546 0.23042 0.14870 0.38970-0.22671
  -1   8  11    2.24    1.22   0 0.90154-0.96000 0.22737 0.15186 0.38664 0.21578
  -1   8  12    1.72    1.63   0 0.89308-0.95072 0.23982 0.13959 0.39907 0.25828
  -1   9   3   43.40    1.80   0 0.89073-0.95650 0.24317 0.18307 0.40241-0.23918
  -1   9  11    1.99    1.22   0 0.89632-0.95458 0.23513 0.19141 0.39440 0.20813
  -1   9  12    8.19    1.67   0 0.88923-0.94542 0.24528 0.18077 0.40451 0.25191
  -1  10   4  184.78    2.55   0 0.89224-0.95711 0.24102 0.23234 0.40027-0.18233
  -1  10   5   -0.84    1.17   0 0.89988-0.96366 0.22987 0.24242 0.38914-0.11701
  -1  10   9   -0.51    1.14   0 0.90062-0.96093 0.22876 0.24485 0.38803 0.10328
  -1  10  10   21.66    1.37   0 0.89594-0.95541 0.23568 0.23799 0.39495 0.15194
  -1  10  11   -0.48    1.65   0 0.89008-0.94835 0.24409 0.22990 0.40332 0.19751
  -1  11   5   37.27    1.79   0 0.89007-0.95281 0.24410 0.27634 0.40333-0.13025
  -1  11   6   61.76    1.80   0 0.89384-0.95645 0.23872 0.28191 0.39798-0.07020
  -1  11   7   34.20    1.41   0 0.89537-0.95733 0.23651 0.28411 0.39577-0.01312
  -1  11   8    3.07    1.15   0 0.89499-0.95570 0.23706 0.28374 0.39632 0.04192
  -1  11   9    4.99    1.64   0 0.89229-0.95259 0.24094 0.27962 0.40019 0.09201
  -1  11  10    1.72    1.58   0 0.89001-0.94671 0.24419 0.27530 0.40342 0.14319
   0  -4  11    0.39    1.74   0 0.88929-0.87849 0.24520-0.43227 0.40442 0.19697
   0  -3  12    3.50    1.55   0 0.89434-0.88442 0.23800-0.37939 0.39726 0.26220
   0  -2  13    1.59    1.57   0 0.89612-0.88477 0.23542-0.32893 0.39469 0.31887
   0  -1  14    0.42    1.69   0 0.89058-0.87894 0.24338-0.28990 0.40262 0.36655
   0   1  15    0.73    1.79   0 0.89346-0.87893 0.23927-0.19025 0.39852 0.42389
   0   2  15    0.77    1.36   0 0.89951-0.88459 0.23042-0.13409 0.38970 0.43261
   0   3  -1 1530.36   14.02   0 0.89607-0.89626 0.23549-0.09198 0.39476-0.45024
   0   7  -1    5.39    1.92   0 0.89548-0.89447 0.23635 0.09585 0.39561-0.45079
   0  10   0   12.87    1.68   0 0.89480-0.89249 0.23734 0.23599 0.39660-0.39642
   0  12   1   10.08    1.75   0 0.88852-0.88436 0.24628 0.32066 0.40550-0.34950
   0  13   2   68.31    2.19   0 0.88998-0.88409 0.24422 0.37083 0.40346-0.29290
   0  14   4    2.66    1.33   0 0.89499-0.88817 0.23706 0.42572 0.39632-0.17588
   0  14   5   34.64    1.50   0 0.90081-0.89338 0.22848 0.43391 0.38775-0.11269
   0  14   9    1.03    1.19   0 0.90118-0.88966 0.22792 0.43550 0.38720 0.10742
   0  15   6    2.66    1.72   0 0.89029-0.88062 0.24379 0.46568 0.40303-0.07300
   0  15   7   -1.87    1.81   0 0.89076-0.88145 0.24312 0.46774 0.40236-0.01959
   0  15   8    2.61    1.84   0 0.89095-0.88035 0.24285 0.46699 0.40209 0.03753
   1  -7   6  158.09    5.98   0 0.83913-0.76286 0.30800-0.63833 0.46600-0.13858
   1  -7  10   23.62    2.98   0 0.87316-0.79389 0.26699-0.59650 0.42598 0.12230
   1  -6  12    1.80    1.74   0 0.88984-0.80895 0.24443-0.52654 0.40366 0.25490
   1  -4   0  258.12    3.78   0 0.90025-0.83073 0.22931-0.41621 0.38859-0.38918
   1  -1  -2 4628.17   15.75   0 0.89801-0.82940 0.23264-0.27772 0.39191-0.50168
   1   2  -3  629.25    8.01   0 0.89385-0.82530 0.23870-0.14234 0.39796-0.56179
   1  11  -2   78.16    2.49   0 0.89336-0.82208 0.23941 0.28119 0.39867-0.50625
   1  13  -1   44.83    1.99   0 0.88803-0.81475 0.24697 0.36730 0.40618-0.45851
   1  14   0   33.68    1.95   0 0.89269-0.81925 0.24037 0.42184 0.39962-0.39716
   1  15   1   56.21    2.26   0 0.89185-0.81758 0.24158 0.46766 0.40082-0.34328
   1  16   2    7.95    1.77   0 0.88774-0.81125 0.24738 0.50829 0.40659-0.29463
   1  16   3   24.25    1.44   0 0.89857-0.82234 0.23181 0.52442 0.39108-0.22375
   1  17   4    4.46    1.84   0 0.88915-0.80952 0.24540 0.55788 0.40463-0.18271
   1  17   5   11.64    1.72   0 0.89352-0.81496 0.23918 0.56505 0.39843-0.12182
   2  -9   6  231.40    4.45   0 0.89028-0.74525 0.24380-0.66789 0.40303-0.07345
   2  -9   7    4.12    2.42   0 0.87779-0.73125 0.26090-0.68546 0.41998-0.03608
   2  -7   1   61.60    2.37   0 0.88851-0.74829 0.24629-0.57520 0.40551-0.35065
   2  -7  14    3.28    2.25   0 0.87715-0.72455 0.26175-0.59010 0.42082 0.34878
   2  13  -3    7.41    2.15   0 0.88558-0.74381 0.25036 0.36467 0.40955-0.56974
   2  17   1   10.18    1.43   0 0.89764-0.75190 0.23319 0.57203 0.39246-0.33292
   3 -10   4   49.80    2.11   0 0.88426-0.67073 0.25218-0.72341 0.41135-0.19066
   3  -9   1   25.51    1.42   0 0.89951-0.68923 0.23042-0.65362 0.38970-0.33260
   3  -8   0  132.99    2.43   0 0.88645-0.67655 0.24917-0.62522 0.40836-0.40702
   3  -5  -3  350.79    3.33   0 0.88815-0.68032 0.24680-0.48081 0.40602-0.56845
   3  -4  -4    9.02    1.30   0 0.90154-0.69468 0.22737-0.41398 0.38664-0.60316
   3  -2  -5    1.48    1.13   0 0.90136-0.69449 0.22765-0.32183 0.38692-0.65754
   3   2  -6  103.87    2.67   0 0.89124-0.68391 0.24244-0.14641 0.40169-0.72725
   3  12  -5   70.18    4.02   0 0.87562-0.66512 0.26377 0.30401 0.42282-0.69133
   3  14  -4   49.28    2.89   0 0.88346-0.67246 0.25327 0.40869 0.41243-0.62555
   4 -11   3    3.24    1.65   0 0.88715-0.60347 0.24819-0.76743 0.40739-0.23859
   4  -9  -1   38.62    1.49   0 0.89556-0.61605 0.23623-0.65969 0.39550-0.44670
   4  -8  -2  211.17    2.66   0 0.89133-0.61273 0.24231-0.61814 0.40156-0.50766
   4  -7  -3    1.16    1.55   0 0.89177-0.61303 0.24169-0.57087 0.40093-0.56069
   4  -6  -4  318.81    2.82   0 0.89876-0.62129 0.23153-0.51304 0.39080-0.60632
   4  -4  -5   23.73    1.83   0 0.88893-0.61190 0.24571-0.43270 0.40493-0.67514
   4  -2  -6  264.72    2.97   0 0.89067-0.61360 0.24326-0.33583 0.40249-0.72700
   4   1  -7  105.54    2.10   0 0.89575-0.61895 0.23596-0.18749 0.39522-0.77426
   4  16  -4   -0.52    1.96   0 0.88333-0.59910 0.25345 0.50431 0.41262-0.62878
   5 -12   2   20.25    1.49   0 0.89839-0.54588 0.23208-0.79735 0.39136-0.27634
   5 -11   0    4.20    1.29   0 0.89801-0.54643 0.23264-0.75092 0.39191-0.38687
   5 -10  -1    2.11    1.72   0 0.88963-0.53892 0.24473-0.71841 0.40396-0.45453
   5  -6  -5    3.20    1.70   0 0.89269-0.54483 0.24037-0.52249 0.39962-0.66810
   5  -2  -7    1.40    1.69   0 0.89150-0.54461 0.24207-0.33552 0.40132-0.77957
   5   1  -8    9.65    1.42   0 0.89857-0.55226 0.23181-0.18379 0.39108-0.82340
   5   2  -8   17.36    1.84   0 0.88975-0.54334 0.24455-0.14890 0.40378-0.83610
   5   8  -8    3.57    2.02   0 0.88597-0.53795 0.24983 0.12816 0.40903-0.84163
   6 -13   2    2.27    1.26   0 0.90062-0.47677 0.22876-0.84122 0.38803-0.27229
   6 -13   3   45.75    2.20   0 0.88890-0.46468 0.24575-0.85872 0.40498-0.23442
   6 -12   0    9.40    1.34   0 0.89839-0.47763 0.23208-0.79671 0.39136-0.38481
   6 -11  -1   15.60    1.80   0 0.88778-0.46709 0.24731-0.76545 0.40653-0.45579
   6  -6  -6   48.24    1.50   0 0.89423-0.47674 0.23816-0.51996 0.39743-0.71940
   6  -4  -7    1.40    1.70   0 0.89153-0.47428 0.24202-0.42968 0.40127-0.77840
   6  -2  -8   37.30    1.54   0 0.89820-0.48211 0.23236-0.32587 0.39163-0.82285
   6   3  -9   19.01    1.81   0 0.89557-0.47819 0.23621-0.09412 0.39548-0.88165
   6   4  -9    1.35    1.80   0 0.89153-0.47447 0.24202-0.05136 0.40127-0.88697
   6   5  -9    5.95    1.76   0 0.89008-0.47285 0.24408-0.00699 0.40332-0.88910
   6   6  -9    2.86    1.67   0 0.89081-0.47317 0.24306 0.04212 0.40230-0.88774
   7 -14   3    0.53    1.36   0 0.89764-0.40224 0.23319-0.89255 0.39246-0.22078
   7 -13   1   28.98    2.05   0 0.88989-0.39733 0.24435-0.85692 0.40358-0.34163
   7 -12  -1   33.62    2.00   0 0.89195-0.40060 0.24143-0.80630 0.40068-0.44697
   7  -7  -6   35.47    2.00   0 0.89055-0.40277 0.24343-0.57276 0.40266-0.72325
   7  -6  -7   -0.43    1.19   0 0.90099-0.41400 0.22820-0.51261 0.38748-0.76141
   7  -4  -8    4.02    1.26   0 0.90062-0.41419 0.22876-0.41571 0.38803-0.81839
   7  -3  -8    2.61    1.62   0 0.88724-0.39971 0.24807-0.38847 0.40728-0.83851
   7  -1  -9    0.93    1.32   0 0.89876-0.41198 0.23153-0.27700 0.39080-0.87608
   7   0  -9    0.11    1.77   0 0.88959-0.40274 0.24477-0.24624 0.40400-0.88928
   7  10  -9   -0.05    2.33   0 0.88233-0.39232 0.25482 0.21787 0.41397-0.89941
   8 -13  -1    3.71    1.43   0 0.90081-0.33820 0.22848-0.84031 0.38775-0.43408
   8 -12  -2    0.80    1.83   0 0.89231-0.33043 0.24092-0.80562 0.40017-0.50127
   8 -11  -3   13.55    1.78   0 0.88756-0.32646 0.24762-0.76595 0.40683-0.56281
   8  -9  -5    4.44    1.67   0 0.88704-0.32816 0.24834-0.67147 0.40755-0.67263
   8  -8  -6   12.67    1.79   0 0.89189-0.33382 0.24152-0.61785 0.40076-0.71994
   8  -7  -7    1.79    1.31   0 0.90006-0.34186 0.22959-0.55834 0.38886-0.76377
   8  -5  -8    0.78    1.23   0 0.89669-0.33905 0.23457-0.46863 0.39384-0.82313
   8  -2  -9    1.52    1.89   0 0.89037-0.33292 0.24367-0.33625 0.40291-0.88769
   8   1 -10    2.82    1.36   0 0.89951-0.34245 0.23042-0.18094 0.38970-0.92829
   8   2 -10   13.25    1.96   0 0.89292-0.33618 0.24005-0.14535 0.39930-0.93661
   8   3 -10    2.19    1.89   0 0.88842-0.33077 0.24642-0.10250 0.40564-0.94399
   8   4 -10   10.39    1.78   0 0.88506-0.32643 0.25108-0.06134 0.41027-0.94887
   8   6 -10    0.29    1.80   0 0.89037-0.33026 0.24367 0.04423 0.40291-0.94821
   8   7 -10    1.21    2.03   0 0.88740-0.32879 0.24784 0.08547 0.40705-0.94573
   9 -11  -4    1.32    1.65   0 0.89037-0.26235 0.24367-0.75485 0.40291-0.60836
   9 -10  -5    0.66    1.34   0 0.89403-0.26456 0.23844-0.71027 0.39770-0.65930
   9  -9  -6    1.16    1.36   0 0.89726-0.26775 0.23374-0.65650 0.39302-0.71195
   9  -7  -7   -0.02    1.65   0 0.88704-0.25819 0.24834-0.57691 0.40755-0.78109
   9  -6  -8    0.34    1.29   0 0.89782-0.27007 0.23291-0.51682 0.39219-0.81854
   9  -4  -9    2.55    1.38   0 0.89932-0.27157 0.23070-0.41729 0.38997-0.87307
   9  -3  -9    3.83    1.82   0 0.88888-0.25960 0.24578-0.38612 0.40500-0.89065
   9  -1 -10    1.02    1.42   0 0.89932-0.27191 0.23070-0.27540 0.38997-0.92743
   9   0 -10    0.81    1.85   0 0.89095-0.26333 0.24285-0.24023 0.40209-0.93939
  -1  -1   5    4.66    1.92   0 0.87653-0.94355 0.26232-0.30787 0.42113-0.14962
  -1  -1  10   -0.33    1.14   0 0.88102-0.94338 0.25633-0.30203 0.41521 0.13148
  -1  -1  11    7.05    1.61   0 0.87090-0.93139 0.26965-0.31618 0.42835 0.17279
  -1   0  12    1.22    1.64   0 0.87295-0.93311 0.26700-0.26624 0.42574 0.23119
  -1   1   3  192.57    3.27   0 0.88384-0.95169 0.25251-0.20401 0.41143-0.24957
  -1   1  12   -0.37    1.22   0 0.88464-0.94480 0.25141-0.20216 0.41034 0.24579
  -1   1  13    7.13    1.67   0 0.87174-0.92969 0.26858-0.22030 0.42730 0.28315
  -1   2  13    6.26    1.64   0 0.87882-0.93776 0.25928-0.16374 0.41813 0.29318
  -1   3   2 3099.44   10.84   0 0.88344-0.95163 0.25306-0.11000 0.41197-0.30434
  -1   3  13   11.08    1.42   0 0.88424-0.94304 0.25196-0.10918 0.41089 0.30030
  -1   3  14   -1.28    1.58   0 0.87206-0.92857 0.26816-0.12413 0.42688 0.33607
  -1   4  14    2.36    1.76   0 0.87395-0.93115 0.26570-0.07548 0.42447 0.34239
  -1   5  14    6.07    1.80   0 0.87570-0.93295 0.26341-0.02580 0.42221 0.34412
  -1   6  14    1.40    1.84   0 0.87500-0.93262 0.26433 0.02073 0.42311 0.34474
  -1   7  14   -0.01    1.84   0 0.87405-0.93144 0.26558 0.06767 0.42435 0.34151
  -1   8   2   12.16    1.26   0 0.88122-0.94808 0.25606 0.12246 0.41494-0.30662
  -1   8  13    0.84    1.24   0 0.88304-0.94008 0.25360 0.12575 0.41251 0.29982
  -1   9   2  101.00    2.23   0 0.87301-0.93927 0.26693 0.15889 0.42567-0.31662
  -1   9  13   18.28    1.38   0 0.87838-0.93599 0.25988 0.16627 0.41872 0.29264
  -1  10   3    1.56    1.20   0 0.88021-0.94607 0.25742 0.21582 0.41629-0.25218
  -1  10  12   -0.55    1.25   0 0.88203-0.94001 0.25497 0.21945 0.41386 0.24207
  -1  11   4   10.80    1.26   0 0.88122-0.94599 0.25606 0.26366 0.41494-0.19661
  -1  11  11    0.93    1.30   0 0.88243-0.94049 0.25442 0.26661 0.41332 0.18952
  -1  11  12    4.20    1.79   0 0.87488-0.93238 0.26450 0.25685 0.42328 0.23463
  -1  12   5    0.39    1.36   0 0.87776-0.94106 0.26069 0.30709 0.41952-0.14560
  -1  12   6    4.16    1.15   0 0.88263-0.94531 0.25415 0.31372 0.41305-0.08492
  -1  12   7   12.57    1.29   0 0.88503-0.94682 0.25087 0.31671 0.40980-0.02619
  -1  12   8    0.67    1.16   0 0.88483-0.94572 0.25114 0.31720 0.41007 0.02850
  -1  12   9   21.47    1.41   0 0.88304-0.94306 0.25360 0.31392 0.41251 0.08019
  -1  12  10    0.20    1.26   0 0.87919-0.93837 0.25879 0.30971 0.41764 0.12853
  -1  12  11   18.29    1.98   0 0.87423-0.93192 0.26534 0.30225 0.42411 0.17830
  -1  13   6    0.28    1.49   0 0.87405-0.93319 0.26558 0.34498 0.42435-0.09718
  -1  13   7   17.29    1.71   0 0.87397-0.93486 0.26568 0.34922 0.42444-0.04107
  -1  13   8   11.18    1.70   0 0.87434-0.93483 0.26520 0.34912 0.42397 0.01430
  -1  13   9    1.69    1.65   0 0.87405-0.93184 0.26558 0.34849 0.42435 0.06823
   0  -5   7   14.76    2.27   0 0.86928-0.86389 0.27172-0.50702 0.43039-0.04818
   0  -5   8    0.69    1.99   0 0.87089-0.86486 0.26967-0.50581 0.42837 0.01020
   0  -5   9  173.20    3.96   0 0.86540-0.85865 0.27663-0.51195 0.43521 0.05674
   0  -4  12   20.14    2.05   0 0.86507-0.85545 0.27705-0.46554 0.43562 0.22094
   0  -3  13    0.93    1.59   0 0.87433-0.86384 0.26521-0.40619 0.42398 0.28914
   0  -2  14    7.00    1.81   0 0.87563-0.86406 0.26352-0.35710 0.42231 0.34448
   0  -1  15    0.47    1.70   0 0.87112-0.85800 0.26937-0.31527 0.42808 0.39434
   0   0  15   -1.50    1.28   0 0.88404-0.87143 0.25224-0.24895 0.41116 0.41058
   0   8  -1   48.14    1.85   0 0.88344-0.88223 0.25306 0.12611 0.41197-0.46642
   0   9  -1   69.84    2.41   0 0.86918-0.86804 0.27185 0.15447 0.43052-0.48419
   0  11   0    0.07    1.60   0 0.87405-0.87332 0.26558 0.25758 0.42435-0.42438
   0  13   1   10.69    1.70   0 0.86954-0.86583 0.27140 0.34349 0.43007-0.37303
   0  14   2    0.01    1.71   0 0.87405-0.86675 0.26558 0.39419 0.42435-0.31312
   0  14   3   17.86    1.39   0 0.88543-0.87981 0.25032 0.41137 0.40926-0.24376
   0  15   4   38.79    1.92   0 0.87851-0.87171 0.25971 0.44938 0.41855-0.19819
   0  15   5   16.59    1.48   0 0.88563-0.87803 0.25005 0.45886 0.40898-0.13335
   0  16   6   18.48    1.93   0 0.87425-0.86519 0.26531 0.49042 0.42408-0.09414
   0  16   7    1.32    1.88   0 0.87632-0.86605 0.26260 0.49497 0.42140-0.03629
   1  -6   3   57.05    2.71   0 0.87399-0.80186 0.26565-0.54791 0.42442-0.26153
   1  -5  14    0.36    1.72   0 0.87405-0.79135 0.26558-0.50002 0.42435 0.34368
   1  -4  15    2.80    1.91   0 0.87570-0.79274 0.26341-0.45064 0.42221 0.40117
   1   9  -3   42.85    2.62   0 0.86919-0.79912 0.27185 0.15455 0.43051-0.59254
   1  12  -2   17.05    1.73   0 0.86709-0.79601 0.27450 0.29328 0.43312-0.53959
   1  15   0    6.59    1.73   0 0.86884-0.79560 0.27229 0.43734 0.43095-0.42709
   1  16   1   46.79    2.05   0 0.86952-0.79507 0.27142 0.48458 0.43009-0.37136
   1  17   3    3.74    1.65   0 0.87720-0.80016 0.26144 0.54506 0.42027-0.25323
   2  -8   3  316.28    4.12   0 0.87879-0.73671 0.25933-0.63565 0.41817-0.25384
   2  -6   0    3.39    1.91   0 0.87756-0.73819 0.26097-0.54267 0.41979-0.41868
   2  -5  -1    0.23    1.85   0 0.87405-0.73480 0.26558-0.49896 0.42435-0.47625
   2  -4  -2   19.65    1.60   0 0.88642-0.74828 0.24895-0.43532 0.40790-0.51673
   2  -2  -3   36.25    2.32   0 0.87188-0.73400 0.26839-0.36022 0.42711-0.59057
   2   0  -4  303.14    3.62   0 0.88102-0.74333 0.25633-0.25408 0.41521-0.63280
   2  11  -4   78.92    3.24   0 0.87380-0.73335 0.26591 0.25497 0.42467-0.64013
   2  15  -2    0.95    1.66   0 0.87270-0.72861 0.26733 0.44158 0.42607-0.53146
   2  16  -1    0.07    1.68   0 0.87601-0.73156 0.26300 0.49477 0.42180-0.47609
   2  17   0    9.56    1.94   0 0.87756-0.73363 0.26097 0.54239 0.41979-0.41534
   3 -10   5   19.61    2.03   0 0.86551-0.65044 0.27650-0.74815 0.43508-0.16070
   3  -9   2    0.45    1.66   0 0.87419-0.66225 0.26539-0.69009 0.42416-0.31168
   3  -7  -1  341.75    3.06   0 0.87960-0.67025 0.25824-0.58696 0.41710-0.47038
   3  -6  -2  369.52    3.14   0 0.88021-0.67151 0.25742-0.53868 0.41629-0.52420
   3  -3  -4    7.62    1.78   0 0.87550-0.66774 0.26368-0.40362 0.42247-0.63913
   3  -1  -5   10.98    1.32   0 0.87980-0.67229 0.25797-0.30318 0.41683-0.68826
   3   3  -6  218.79    3.52   0 0.87856-0.67104 0.25963-0.11618 0.41848-0.74383
   3   4  -6   12.68    1.99   0 0.86733-0.65989 0.27420-0.08311 0.43282-0.75791
   3   7  -6   18.35    2.56   0 0.85919-0.65131 0.28430 0.04831 0.44272-0.76748
   3  16  -3    0.80    1.96   0 0.86614-0.65272 0.27570 0.48012 0.43430-0.59303
   3  17  -2    2.77    1.81   0 0.87488-0.66107 0.26450 0.53986 0.42328-0.52735
   4 -11   4   43.38    2.01   0 0.87041-0.58593 0.27028-0.78896 0.42897-0.20821
   4 -11  11    2.62    3.00   0 0.83610-0.54325 0.31115-0.82964 0.46880 0.13526
   4 -10   1   21.32    1.34   0 0.88344-0.60232 0.25306-0.72372 0.41197-0.35432
   4  -5  -4  146.05    2.44   0 0.87351-0.59575 0.26628-0.49995 0.42504-0.64147
   4  -1  -6    4.24    1.73   0 0.87273-0.59532 0.26730-0.31303 0.42604-0.75141
   4   2  -7    7.81    1.31   0 0.88444-0.60767 0.25169-0.15580 0.41061-0.78943
   4   3  -7   42.65    2.16   0 0.87407-0.59695 0.26555-0.12187 0.42432-0.80325
   4   8  -7   23.86    2.48   0 0.86984-0.59178 0.27101 0.10820 0.42969-0.80774
   5 -12   3   29.87    1.60   0 0.88384-0.53017 0.25251-0.81798 0.41143-0.24290
   5 -12   4    3.64    1.85   0 0.87029-0.51545 0.27044-0.83678 0.42913-0.20603
   5 -11   1   67.06    2.07   0 0.87838-0.52639 0.25987-0.77766 0.41871-0.35959
   5  -9  -2  106.80    1.91   0 0.88183-0.53252 0.25524-0.67840 0.41413-0.51953
   5  -8  -3   18.75    1.36   0 0.88102-0.53242 0.25633-0.63225 0.41521-0.57554
   5  -7  -4  367.34    2.96   0 0.88464-0.53666 0.25141-0.57995 0.41034-0.62512
   5  -5  -5   71.46    2.00   0 0.87035-0.52245 0.27036-0.50380 0.42905-0.69912
   5  -4  -6   14.02    1.31   0 0.88662-0.53988 0.24867-0.43577 0.40762-0.73125
   5  -1  -7   39.00    2.06   0 0.87543-0.52835 0.26378-0.30918 0.42257-0.80080
   5   3  -8   12.12    1.34   0 0.88163-0.53483 0.25551-0.11266 0.41440-0.84657
   5   4  -8    3.15    1.70   0 0.87514-0.52782 0.26415-0.07423 0.42293-0.85495
   5   5  -8   14.27    1.90   0 0.87206-0.52520 0.26816-0.03027 0.42688-0.85902
   5   6  -8   32.66    2.13   0 0.87141-0.52408 0.26900 0.01601 0.42771-0.85986
   5   7  -8    0.25    1.86   0 0.87384-0.52536 0.26585 0.06622 0.42461-0.85642
   6 -13   4   84.65    2.46   0 0.87637-0.45090 0.26254-0.87502 0.42134-0.19604
   6 -12   1    1.37    1.25   0 0.88143-0.45869 0.25579-0.82131 0.41467-0.35360
   6 -10  -2   33.90    1.42   0 0.88021-0.46012 0.25742-0.72789 0.41629-0.52038
   6  -9  -3   58.02    1.90   0 0.87756-0.45844 0.26097-0.68421 0.41979-0.57853
   6  -8  -4   36.79    1.40   0 0.87899-0.46061 0.25906-0.63483 0.41791-0.63123
   6  -7  -5    0.30    1.11   0 0.88464-0.46686 0.25141-0.58291 0.41034-0.67560
   6  -5  -6   -0.56    1.69   0 0.87446-0.45704 0.26504-0.50223 0.42381-0.74387
   6  -3  -7   53.65    2.09   0 0.87436-0.45706 0.26517-0.40487 0.42394-0.80115
   6  -1  -8   49.05    1.70   0 0.88523-0.46853 0.25059-0.29625 0.40953-0.84116
   6   0  -8  165.59    2.93   0 0.87261-0.45604 0.26745-0.26496 0.42619-0.85808
   6  11  -8    0.48    2.31   0 0.86540-0.44565 0.27663 0.24610 0.43521-0.86679
   7 -13   2   21.03    1.96   0 0.87467-0.37994 0.26477-0.87737 0.42354-0.30640
   7 -12   0    1.38    1.81   0 0.87413-0.38156 0.26547-0.83067 0.42424-0.41699
   7 -11  -2    3.55    1.27   0 0.88424-0.39290 0.25196-0.76992 0.41089-0.51353
   7 -10  -3    1.66    1.24   0 0.88021-0.38981 0.25742-0.72852 0.41629-0.57337
   7  -9  -4    0.93    1.24   0 0.87980-0.39008 0.25797-0.68169 0.41683-0.62858
   7  -8  -5    1.52    1.26   0 0.88324-0.39418 0.25333-0.62972 0.41224-0.67866
   7  -6  -6   36.59    1.85   0 0.87091-0.38276 0.26964-0.55047 0.42834-0.75045
   7  -5  -7    1.55    1.24   0 0.88424-0.39625 0.25196-0.48674 0.41089-0.78693
   7  -2  -8   22.00    2.00   0 0.87249-0.38532 0.26761-0.35932 0.42634-0.85755
   7   1  -9    1.97    1.35   0 0.87899-0.39138 0.25906-0.21008 0.41791-0.90300
   7   2  -9    0.31    1.79   0 0.87070-0.38278 0.26991-0.17363 0.42861-0.91415
   7   9  -9   -0.29    1.89   0 0.86574-0.37577 0.27621 0.14918 0.43479-0.92006
   8 -13   0    0.48    1.35   0 0.88563-0.32356 0.25005-0.86302 0.40898-0.39825
   8 -13   1    1.33    1.71   0 0.87028-0.30629 0.27046-0.88287 0.42914-0.36625
   8 -12  -1    2.54    1.87   0 0.87446-0.31188 0.26504-0.83075 0.42381-0.47033
   8 -10  -4    2.85    1.26   0 0.88523-0.32496 0.25059-0.72122 0.40953-0.62013
   8  -7  -6   -1.85    1.75   0 0.87332-0.31465 0.26653-0.59854 0.42528-0.74405
   8  -6  -7    1.76    1.28   0 0.88324-0.32470 0.25333-0.53505 0.41224-0.78715
   8  -4  -8    0.90    1.27   0 0.88223-0.32410 0.25470-0.44190 0.41359-0.84325
   8  -1  -9    1.07    1.77   0 0.87792-0.32023 0.26048-0.30564 0.41932-0.90285
   8   5 -10   -0.96    1.44   0 0.88324-0.32452 0.25333-0.01766 0.41224-0.95093
   9 -11  -3   -2.25    1.86   0 0.87394-0.24313 0.26572-0.78484 0.42448-0.57690
   9 -10  -4    2.23    1.88   0 0.87217-0.24118 0.26802-0.73822 0.42675-0.63648
   9  -9  -5   -3.14    1.84   0 0.87394-0.24427 0.26572-0.69108 0.42448-0.68656
   9  -8  -6    0.33    1.39   0 0.87879-0.24968 0.25933-0.63766 0.41818-0.73488
   9  -5  -8    0.03    1.33   0 0.88324-0.25500 0.25333-0.49045 0.41224-0.83896
   9  -2  -9    1.68    1.92   0 0.87438-0.24609 0.26515-0.35704 0.42392-0.90607
   9   1 -10    2.26    1.48   0 0.88344-0.25509 0.25306-0.20350 0.41197-0.94991
   9   2 -10    2.09    2.10   0 0.87653-0.24795 0.26232-0.16543 0.42113-0.95895
   9   3 -10    0.68    2.01   0 0.87108-0.24221 0.26942-0.12518 0.42812-0.96630
  -2   3   7   31.80    1.75   0 0.85409-0.98846 0.28989-0.14759 0.44863-0.06810
  -2   3   8    4.16    1.57   0 0.85644-0.99022 0.28708-0.14504 0.44589-0.01066
  -2   3   9    0.18    1.62   0 0.85575-0.98846 0.28790-0.14529 0.44669 0.04317
  -2   4   6   -1.38    1.50   0 0.85542-0.98989 0.28830-0.09965 0.44708-0.12152
  -2   4   7   -0.42    1.43   0 0.85851-0.99500 0.28456-0.09452 0.44344-0.06089
  -2   4   8   53.90    1.56   0 0.86223-0.99632 0.28000-0.09047 0.43899-0.00357
  -2   4   9   10.10    1.25   0 0.86070-0.99411 0.28188-0.09241 0.44082 0.04948
  -2   4  10   11.56    1.73   0 0.85694-0.98906 0.28648-0.09761 0.44530 0.09990
  -2   5   6   11.77    1.64   0 0.85873-0.99397 0.28429-0.04790 0.44317-0.11655
  -2   5   7   -0.05    1.10   0 0.86396-0.99855 0.27785-0.04112 0.43688-0.05601
  -2   5   8   42.98    1.48   0 0.86568-0.99932 0.27569-0.03872 0.43477 0.00068
  -2   5   9    3.31    1.18   0 0.86396-0.99694 0.27785-0.04082 0.43688 0.05443
  -2   5  10    4.07    1.50   0 0.85891-0.99196 0.28407-0.04652 0.44296 0.10444
  -2   5  11   72.76    2.14   0 0.85489-0.98468 0.28895-0.05230 0.44771 0.15276
  -2   6   6    4.86    1.53   0 0.85879-0.99499 0.28422 0.00056 0.44311-0.11504
  -2   6   7   24.86    1.25   0 0.86503-0.99916 0.27650 0.00760 0.43557-0.05416
  -2   6   8    2.31    1.09   0 0.86611-0.99973 0.27516 0.00927 0.43425 0.00254
  -2   6   9   33.75    1.40   0 0.86482-0.99746 0.27677 0.00707 0.43583 0.05473
  -2   6  10    1.89    1.20   0 0.86070-0.99263 0.28188 0.00277 0.44082 0.10560
  -2   6  11   11.54    1.68   0 0.85628-0.98551 0.28726-0.00370 0.44607 0.15446
  -2   7   6   42.89    1.76   0 0.85859-0.99343 0.28446 0.04693 0.44334-0.11679
  -2   7   7   10.10    1.15   0 0.86353-0.99745 0.27839 0.05296 0.43741-0.05600
  -2   7   8    2.84    1.07   0 0.86482-0.99809 0.27677 0.05425 0.43583 0.00022
  -2   7   9    2.45    1.05   0 0.86353-0.99584 0.27839 0.05341 0.43741 0.05414
  -2   7  10   22.28    1.58   0 0.85971-0.99143 0.28310 0.04812 0.44201 0.10394
  -2   7  11    3.37    1.61   0 0.85523-0.98457 0.28853 0.04287 0.44730 0.15307
  -2   8   6   22.05    1.61   0 0.85637-0.98982 0.28716 0.09130 0.44597-0.11931
  -2   8   7   13.60    1.48   0 0.86005-0.99380 0.28268 0.09600 0.44161-0.06025
  -2   8   8    7.18    1.07   0 0.86179-0.99461 0.28054 0.09743 0.43951-0.00341
  -2   8   9   -1.08    1.40   0 0.85851-0.99279 0.28456 0.09593 0.44344 0.04861
  -2   8  10    0.21    1.50   0 0.85653-0.98839 0.28697 0.09227 0.44578 0.10121
  -2   9   7    1.86    1.53   0 0.85606-0.98840 0.28753 0.13791 0.44633-0.06469
  -2   9   8   -0.31    1.53   0 0.85675-0.98944 0.28670 0.13930 0.44552-0.01013
  -2   9   9    2.19    1.61   0 0.85653-0.98763 0.28697 0.13912 0.44578 0.04553
  -2   9  10   14.90    1.51   0 0.85393-0.98370 0.29009 0.13524 0.44882 0.09698
  -1  -2   6  113.70    2.86   0 0.85190-0.91803 0.29250-0.38601 0.45117-0.12520
  -1  -2   7   73.47    2.35   0 0.86353-0.92938 0.27839-0.37202 0.43741-0.05657
  -1  -2   8  159.50    2.65   0 0.86653-0.93160 0.27462-0.36833 0.43372 0.00207
  -1  -2   9   22.37    1.50   0 0.86353-0.92780 0.27839-0.37205 0.43741 0.05313
  -1  -2  10   -1.68    1.58   0 0.85642-0.91998 0.28710-0.37979 0.44591 0.10057
  -1  -1  12    0.54    1.54   0 0.85611-0.91722 0.28747-0.33398 0.44627 0.21021
  -1   0  13    0.29    1.65   0 0.85719-0.91848 0.28617-0.28370 0.44500 0.26611
  -1   1  14    3.26    1.68   0 0.85552-0.91345 0.28818-0.23933 0.44697 0.31833
  -1   2   2   48.12    2.33   0 0.86396-0.93259 0.27785-0.18215 0.43688-0.32923
  -1   2  14    3.67    1.25   0 0.86353-0.92252 0.27839-0.18199 0.43741 0.32853
  -1   3  15    2.83    1.82   0 0.85603-0.91152 0.28757-0.14394 0.44637 0.37281
  -1   4  15    3.07    1.80   0 0.85698-0.91561 0.28642-0.09574 0.44525 0.37744
  -1   5   1  398.87    4.15   0 0.85626-0.92465 0.28730-0.04966 0.44610-0.39246
  -1   6   1  309.61    3.60   0 0.85867-0.92686 0.28437 0.00026 0.44325-0.38955
  -1   7   1  794.32    5.15   0 0.85664-0.92460 0.28683 0.04527 0.44565-0.39166
  -1  10   2  145.21    2.38   0 0.86091-0.92758 0.28162 0.19149 0.44057-0.33149
  -1  11   3   20.38    1.34   0 0.86824-0.93358 0.27246 0.24771 0.43160-0.26766
  -1  12   3   52.49    2.04   0 0.85588-0.92028 0.28775 0.27955 0.44654-0.28192
  -1  12   4    5.57    1.22   0 0.86845-0.93270 0.27219 0.29575 0.43134-0.21238
  -1  13   4    2.87    1.77   0 0.85559-0.91873 0.28810 0.32645 0.44688-0.22786
  -1  13   5   21.53    1.40   0 0.86439-0.92765 0.27731 0.33747 0.43636-0.16198
  -1  13  10    2.81    1.23   0 0.86888-0.92771 0.27165 0.34443 0.43081 0.11703
  -1  14   6    3.31    1.75   0 0.85680-0.91862 0.28664 0.37618 0.44546-0.11682
  -1  14   7   -0.46    1.54   0 0.85840-0.92131 0.28469 0.38066 0.44357-0.06123
  -1  14   8    2.24    1.23   0 0.86158-0.92177 0.28081 0.38233 0.43977-0.00153
  -1  14   9    1.25    1.47   0 0.86070-0.91996 0.28188 0.38128 0.44082 0.05220
   0  -5  10  208.52    4.00   0 0.85464-0.84673 0.28924-0.52470 0.44799 0.09887
   0  -3  14    0.55    1.69   0 0.85229-0.84144 0.29204-0.43264 0.45071 0.31624
   0  -2  15    0.02    1.83   0 0.85297-0.84097 0.29124-0.38439 0.44994 0.37187
   0  10  -1  509.39    4.64   0 0.85259-0.85082 0.29168 0.18155 0.45037-0.50399
   0  12   0  103.97    2.33   0 0.85910-0.85608 0.28384 0.28380 0.44274-0.44132
   0  15   2   -0.17    1.51   0 0.85364-0.84588 0.29044 0.41557 0.44916-0.34050
   0  15   3   66.45    1.78   0 0.86718-0.86122 0.27381 0.43524 0.43293-0.26658
   0  16   4   17.50    1.91   0 0.85983-0.85303 0.28295 0.47378 0.44187-0.22024
   0  16   5    5.07    1.42   0 0.86824-0.85991 0.27246 0.48492 0.43160-0.15608
   1  -7  11    2.31    2.31   0 0.83953-0.76018 0.30679-0.63640 0.46501 0.13735
   1  -6  13    0.20    1.84   0 0.85453-0.77483 0.28937-0.57205 0.44812 0.26521
   1  -2  -1    6.75    2.90   0 0.85431-0.78482 0.28964-0.38210 0.44838-0.50403
   1  14  -1    5.12    1.71   0 0.86040-0.78708 0.28225 0.38033 0.44119-0.49347
   1  17   2    0.64    1.26   0 0.86396-0.78664 0.27785 0.52715 0.43688-0.32508
   2  14  -3   79.76    2.93   0 0.84566-0.70451 0.29980 0.36245 0.45825-0.61786
   3 -10   6  117.01    3.30   0 0.84710-0.63144 0.29814-0.77018 0.45664-0.12755
   3 -10  10    1.02    2.84   0 0.81752-0.59801 0.33061-0.80160 0.48785 0.06145
   3  -8   1  144.10    2.64   0 0.85308-0.64229 0.29111-0.66738 0.44981-0.39428
   3  -4  -3   76.29    2.24   0 0.85523-0.64721 0.28853-0.47488 0.44730-0.60995
   3   0  -5   64.34    2.29   0 0.85610-0.64869 0.28748-0.28503 0.44629-0.71753
   3   5  -6   27.17    2.24   0 0.85777-0.64942 0.28547-0.04739 0.44432-0.76914
   3   6  -6  144.79    3.56   0 0.85440-0.64605 0.28952-0.00424 0.44827-0.77313
   4 -11   5  188.60    3.19   0 0.85365-0.56860 0.29042-0.80945 0.44915-0.17345
   4 -10   2   -1.39    1.61   0 0.85807-0.57708 0.28509-0.75538 0.44396-0.32844
   4  -9   0   18.25    1.32   0 0.86866-0.58828 0.27192-0.69531 0.43107-0.42866
   4  -8  -1   17.97    1.61   0 0.86049-0.58068 0.28215-0.65841 0.44108-0.49338
   4  -7  -2   20.99    1.60   0 0.85834-0.57944 0.28477-0.61330 0.44364-0.55042
   4  -6  -3  138.97    2.10   0 0.86266-0.58407 0.27946-0.56054 0.43846-0.60012
   4  -3  -5  374.84    3.08   0 0.86503-0.58740 0.27650-0.41560 0.43557-0.70610
   4   0  -6  481.03    3.94   0 0.85229-0.57505 0.29204-0.28958 0.45072-0.77564
   4   4  -7    0.64    1.36   0 0.86482-0.58623 0.27677-0.08712 0.43583-0.81486
   4   5  -7   88.25    2.72   0 0.85794-0.57982 0.28526-0.04738 0.44412-0.82244
   4   6  -7    3.15    1.69   0 0.85586-0.57726 0.28777-0.00281 0.44656-0.82533
   4   7  -7   30.22    2.24   0 0.85778-0.57899 0.28546 0.04677 0.44431-0.82251
   4  15  -5   -0.25    2.40   0 0.79883-0.51764 0.34942 0.36771 0.50571-0.77834
   5 -12   5    3.57    1.69   0 0.85589-0.50096 0.28774-0.85346 0.44653-0.16873
   5 -11   2   22.29    1.85   0 0.85758-0.50457 0.28569-0.80386 0.44454-0.33132
   5 -10   0   50.96    1.62   0 0.86353-0.51269 0.27839-0.74913 0.43741-0.43377
   5  -9  -1   22.59    1.85   0 0.85369-0.50330 0.29038-0.71323 0.44910-0.50092
   5  -6  -4   12.90    1.70   0 0.85775-0.50873 0.28549-0.56701 0.44434-0.65909
   5  -3  -6   13.19    1.40   0 0.86611-0.51838 0.27516-0.41461 0.43425-0.75816
   5   0  -7   53.86    2.24   0 0.85894-0.51154 0.28403-0.28159 0.44292-0.82107
   6 -13   5   -0.08    1.36   0 0.86589-0.44250 0.27542-0.88762 0.43451-0.15236
   6 -13   6    5.22    1.95   0 0.85637-0.43005 0.28716-0.89925 0.44597-0.11193
   6 -13   7    1.11    1.87   0 0.85027-0.42324 0.29443-0.90666 0.45304-0.06412
   6 -12   2   83.09    1.91   0 0.86374-0.44024 0.27812-0.84352 0.43715-0.32263
   6 -11   0    1.25    1.24   0 0.86611-0.44465 0.27516-0.79386 0.43425-0.42778
   6 -10  -1    1.31    1.72   0 0.85542-0.43431 0.28830-0.75937 0.44708-0.49629
   6  -7  -4   24.97    1.72   0 0.85297-0.43435 0.29124-0.61926 0.44994-0.66413
   6  -6  -5   46.88    1.54   0 0.86179-0.44349 0.28054-0.56162 0.43951-0.70825
   6  -4  -6    0.07    1.71   0 0.85341-0.43492 0.29070-0.47822 0.44942-0.77197
   6  -2  -7   58.15    2.23   0 0.85646-0.43866 0.28706-0.37902 0.44587-0.82328
   6   1  -8   51.86    2.38   0 0.85928-0.44157 0.28363-0.23411 0.44253-0.87392
   7 -13   3    0.99    1.74   0 0.85709-0.36276 0.28629-0.89498 0.44512-0.27375
   7 -12   1    1.30    1.76   0 0.85520-0.36217 0.28857-0.85363 0.44734-0.38603
   7 -11  -1   10.48    1.38   0 0.86266-0.37148 0.27946-0.79687 0.43846-0.48702
   7 -10  -2    3.49    1.74   0 0.85595-0.36490 0.28766-0.75874 0.44646-0.54938
   7  -9  -3    5.33    1.58   0 0.85411-0.36255 0.28987-0.71468 0.44861-0.60737
   7  -8  -4    5.99    1.68   0 0.85508-0.36571 0.28871-0.66511 0.44748-0.65990
   7  -7  -5    4.10    1.32   0 0.86070-0.37161 0.28188-0.61122 0.44082-0.70735
   7  -4  -7   35.36    1.47   0 0.86632-0.37868 0.27489-0.46151 0.43398-0.81003
   7  -1  -8   11.08    1.92   0 0.85725-0.36876 0.28609-0.33073 0.44493-0.87564
   7   3  -9    8.55    1.43   0 0.86223-0.37347 0.28000-0.13673 0.43899-0.92370
   7   4  -9    6.04    2.03   0 0.85657-0.36776 0.28692-0.09668 0.44573-0.93081
   7   5  -9    7.75    2.03   0 0.85279-0.36447 0.29145-0.05357 0.45014-0.93537
   7   6  -9   13.13    1.85   0 0.85062-0.36229 0.29402-0.00979 0.45264-0.93750
   7   7  -9    0.95    1.83   0 0.85162-0.36193 0.29283 0.04038 0.45149-0.93661
   7   8  -9    4.82    1.93   0 0.85598-0.36661 0.28763 0.09166 0.44643-0.93100
   8 -13   2   20.29    2.04   0 0.85470-0.28946 0.28917-0.90226 0.44792-0.33019
   8 -12   0   25.26    2.07   0 0.85505-0.29247 0.28875-0.85361 0.44752-0.44028
   8 -11  -2    3.52    1.35   0 0.86589-0.30449 0.27542-0.79365 0.43451-0.53531
   8 -10  -3    5.77    1.24   0 0.86179-0.30117 0.28054-0.75124 0.43951-0.59539
   8  -9  -4    4.38    1.28   0 0.86158-0.30148 0.28081-0.70418 0.43977-0.65052
   8  -8  -5    0.09    1.34   0 0.86525-0.30615 0.27623-0.65512 0.43530-0.69815
   8  -5  -7    1.09    1.26   0 0.86546-0.30635 0.27596-0.51098 0.43504-0.80978
   8  -3  -8    2.84    1.40   0 0.86696-0.30810 0.27408-0.41451 0.43319-0.86252
   8   0  -9   -0.79    1.37   0 0.86696-0.30823 0.27408-0.27578 0.43319-0.91611
   8   1  -9    0.21    1.84   0 0.85653-0.29757 0.28697-0.24092 0.44578-0.92913
   9 -12  -1    3.12    1.77   0 0.85895-0.22698 0.28402-0.84718 0.44291-0.48757
   9 -11  -2    1.45    1.74   0 0.85518-0.22103 0.28859-0.81044 0.44736-0.54917
   9  -7  -6    1.17    1.89   0 0.85895-0.22884 0.28402-0.61317 0.44291-0.76165
   9  -6  -7    0.64    1.25   0 0.86951-0.23992 0.27083-0.55281 0.43001-0.80355
   9  -4  -8    7.86    1.36   0 0.86781-0.23899 0.27300-0.46013 0.43213-0.86020
   9  -3  -8    1.03    1.75   0 0.85274-0.22332 0.29150-0.43076 0.45020-0.87912
   9  -1  -9   -1.19    1.49   0 0.86288-0.23363 0.27919-0.32795 0.43820-0.91990
  10  -6  -7    2.65    1.73   0 0.85983-0.15953 0.28295-0.56440 0.44187-0.81394
  10  -4  -8    1.82    1.95   0 0.85817-0.15803 0.28498-0.47204 0.44384-0.87096
  -2   2   7   24.76    1.79   0 0.84063-0.97649 0.30475-0.20934 0.46353-0.08370
  -2   2   8    1.16    1.10   0 0.84513-0.97990 0.29959-0.20449 0.45856-0.02246
  -2   2   9    4.61    1.19   0 0.84421-0.97871 0.30065-0.20516 0.45958 0.03141
  -2   2  10    2.23    1.74   0 0.83882-0.97370 0.30679-0.21168 0.46549 0.08150
  -2   2  11    7.66    1.86   0 0.83595-0.96692 0.31001-0.21474 0.46859 0.13073
  -2   3   6  185.69    2.35   0 0.84513-0.98128 0.29959-0.15688 0.45856-0.13319
  -2   3  10  109.88    1.98   0 0.85036-0.98350 0.29348-0.15096 0.45265 0.09242
  -2   3  11   57.34    1.72   0 0.84352-0.97602 0.30145-0.15902 0.46034 0.13940
  -2   3  12   17.32    1.84   0 0.83624-0.96599 0.30968-0.16740 0.46828 0.18684
  -2   4   5   62.73    2.01   0 0.84154-0.97819 0.30371-0.11373 0.46253-0.19153
  -2   4  11   13.54    1.37   0 0.84991-0.98189 0.29402-0.10411 0.45316 0.14701
  -2   4  12   74.27    2.21   0 0.84073-0.97244 0.30463-0.11498 0.46342 0.19118
  -2   5   5   21.31    1.33   0 0.84764-0.98385 0.29668-0.05956 0.45574-0.18498
  -2   5  12   30.41    1.53   0 0.84467-0.97594 0.30012-0.06313 0.45907 0.19582
  -2   5  13   -0.62    1.76   0 0.83465-0.96462 0.31146-0.07401 0.46998 0.24022
  -2   6   4  107.20    2.18   0 0.83390-0.97052 0.31228-0.02806 0.47077-0.25410
  -2   6   5   16.84    1.21   0 0.84969-0.98576 0.29428-0.00966 0.45342-0.18248
  -2   6  12    4.63    1.29   0 0.84628-0.97726 0.29827-0.01335 0.45727 0.19758
  -2   6  13    0.75    1.81   0 0.83771-0.96630 0.30804-0.02317 0.46670 0.24263
  -2   7   4  127.49    2.22   0 0.83425-0.97057 0.31189 0.01960 0.47040-0.25363
  -2   7   5   53.63    1.47   0 0.84901-0.98480 0.29508 0.03647 0.45419-0.18290
  -2   7  12   13.25    1.29   0 0.84582-0.97672 0.29880 0.03214 0.45779 0.19707
  -2   7  13   -0.51    1.73   0 0.83724-0.96646 0.30857 0.02430 0.46720 0.24107
  -2   8   5   22.26    1.28   0 0.84605-0.98146 0.29853 0.07998 0.45753-0.18585
  -2   8  11    0.74    1.20   0 0.85127-0.98222 0.29242 0.08709 0.45161 0.14933
  -2   8  12    5.71    1.19   0 0.84398-0.97407 0.30092 0.07830 0.45983 0.19622
  -2   8  13    4.41    1.79   0 0.83672-0.96399 0.30915 0.06984 0.46776 0.24123
  -2   9   5   54.90    1.83   0 0.84047-0.97590 0.30492 0.12112 0.46370-0.19194
  -2   9   6   23.66    1.26   0 0.84969-0.98419 0.29428 0.13158 0.45342-0.12661
  -2   9  11   -0.90    1.20   0 0.84719-0.97828 0.29721 0.13002 0.45625 0.14316
  -2   9  12    3.91    1.69   0 0.83984-0.97037 0.30564 0.12157 0.46438 0.19184
  -2  10   5   16.41    1.60   0 0.83352-0.96863 0.31270 0.16061 0.47117-0.19898
  -2  10   6    2.51    1.15   0 0.84283-0.97698 0.30224 0.17115 0.46111-0.13402
  -2  10   7   65.59    1.57   0 0.84787-0.98148 0.29641 0.17681 0.45548-0.07393
  -2  10   8    1.47    1.16   0 0.84991-0.98274 0.29402 0.17980 0.45316-0.01641
  -2  10   9   16.58    1.37   0 0.84946-0.98165 0.29455 0.17853 0.45368 0.03733
  -2  10  10    1.03    1.15   0 0.84673-0.97795 0.29774 0.17631 0.45676 0.08954
  -2  10  11   -0.23    1.57   0 0.83993-0.97280 0.30554 0.17059 0.46429 0.13715
  -2  10  12    3.20    1.75   0 0.83644-0.96489 0.30947 0.16413 0.46807 0.18713
  -2  11   6   57.87    1.83   0 0.83492-0.96828 0.31116 0.20914 0.46969-0.14230
  -2  11   7   39.65    1.81   0 0.83975-0.97311 0.30574 0.21465 0.46449-0.08277
  -2  11   8    1.91    1.51   0 0.84102-0.97474 0.30430 0.21793 0.46309-0.02548
  -2  11   9    8.92    1.53   0 0.84168-0.97383 0.30355 0.21789 0.46237 0.03017
  -2  11  10    2.88    1.69   0 0.83981-0.97084 0.30567 0.21492 0.46442 0.08152
  -2  11  11    4.09    1.81   0 0.83660-0.96531 0.30928 0.21130 0.46789 0.13253
  -2  12   9   -2.01    1.58   0 0.83547-0.96485 0.31054 0.25569 0.46910 0.01911
  -1  -2  11    3.15    1.13   0 0.84513-0.90824 0.29959-0.39274 0.45856 0.14271
  -1  -2  12    2.29    1.52   0 0.83359-0.89459 0.31262-0.40566 0.47110 0.18342
  -1  -1   4  938.84    7.35   0 0.84060-0.90873 0.30478-0.35083 0.46356-0.24724
  -1  -1  13    7.66    1.82   0 0.83958-0.90107 0.30593-0.35218 0.46467 0.24564
  -1   0   3 1482.17    8.94   0 0.84329-0.91179 0.30171-0.30049 0.46060-0.29881
  -1   0  14   -1.21    1.74   0 0.83888-0.90086 0.30673-0.30406 0.46543 0.30061
  -1   1  15    0.39    1.81   0 0.83689-0.89592 0.30896-0.25817 0.46758 0.35118
  -1   2  15    0.14    1.32   0 0.84605-0.90576 0.29853-0.20045 0.45753 0.36226
  -1   4   1  155.74    2.89   0 0.84536-0.91428 0.29933-0.10883 0.45830-0.40500
  -1   8   1   62.88    1.78   0 0.85059-0.91836 0.29322 0.08588 0.45239-0.39838
  -1   9   1  256.55    3.10   0 0.84228-0.90987 0.30287 0.12349 0.46172-0.40753
  -1  11   2   79.14    1.80   0 0.84810-0.91460 0.29614 0.22443 0.45522-0.34594
  -1  12   2   16.66    1.81   0 0.83477-0.90057 0.31132 0.25637 0.46985-0.36014
  -1  13   3   84.45    2.30   0 0.83954-0.90490 0.30598 0.30892 0.46471-0.30022
  -1  14   4  112.32    2.44   0 0.83886-0.90325 0.30674 0.35524 0.46545-0.24602
  -1  14   5   27.38    1.49   0 0.84946-0.91318 0.29455 0.36692 0.45368-0.17968
  -1  15   5    9.15    1.69   0 0.83483-0.89699 0.31125 0.39745 0.46978-0.19576
  -1  15   6   24.03    1.96   0 0.84144-0.90395 0.30382 0.40534 0.46264-0.13357
  -1  15   7    1.14    1.24   0 0.84559-0.90704 0.29906 0.41165 0.45804-0.07467
  -1  15   8    7.71    1.35   0 0.84764-0.90849 0.29668 0.41309 0.45574-0.01800
   0  -5   6    2.44    2.48   0 0.83091-0.82714 0.31557-0.55018 0.47393-0.14690
   0  -5  11    2.80    1.88   0 0.83691-0.82921 0.30894-0.54359 0.46756 0.13385
   0  -4  13    0.37    1.60   0 0.84190-0.83316 0.30330-0.49076 0.46213 0.24999
   0  11  -1   21.47    1.87   0 0.83400-0.83195 0.31217 0.20807 0.47066-0.52423
   0  13   0   -0.17    1.63   0 0.83818-0.83460 0.30751 0.30774 0.46619-0.46539
   0  14   1   48.63    1.69   0 0.84833-0.84431 0.29588 0.36622 0.45496-0.39851
   0  16   3   30.25    1.57   0 0.84696-0.84136 0.29747 0.45851 0.45651-0.29027
   0  17   4   -0.17    1.79   0 0.83865-0.83122 0.30699 0.49855 0.46569-0.24806
   0  17   5    0.75    1.32   0 0.84923-0.84071 0.29482 0.51044 0.45393-0.17892
   1  -5   2   63.60    2.87   0 0.83354-0.76254 0.31268-0.54754 0.47116-0.36302
   1   0  -2    0.63    2.84   0 0.83832-0.76917 0.30735-0.30723 0.46604-0.57431
   1   3  -3  602.30    9.95   0 0.83514-0.76632 0.31091-0.16713 0.46945-0.63285
   1  10  -3    0.82    1.73   0 0.83955-0.76844 0.30597 0.16736 0.46470-0.62735
   1  13  -2   27.57    1.94   0 0.83798-0.76573 0.30773 0.30729 0.46640-0.57328
   1  15  -1    9.60    1.69   0 0.83290-0.75963 0.31339 0.39570 0.47183-0.52325
   1  16   0    6.80    1.84   0 0.84167-0.76770 0.30356 0.45266 0.46238-0.45974
   1  17   1   -0.13    1.66   0 0.83771-0.76366 0.30804 0.50276 0.46670-0.41009
   2  -8   4  447.30    5.02   0 0.84135-0.69853 0.30392-0.68042 0.46273-0.24401
   2  -8  13    0.98    2.54   0 0.83496-0.68486 0.31110-0.68635 0.46964 0.24317
   2  -7   2   64.67    2.02   0 0.84582-0.70471 0.29880-0.62803 0.45779-0.34851
   2  -3  -2 4195.72   11.69   0 0.84260-0.70374 0.30250-0.44187 0.46136-0.57032
   2   1  -4  107.10    2.59   0 0.84901-0.71063 0.29508-0.24557 0.45419-0.67147
   2  12  -4   12.30    2.29   0 0.82385-0.68292 0.32319 0.24474 0.48121-0.69638
   2  16  -2   16.78    1.91   0 0.83591-0.69256 0.31005 0.44590 0.46863-0.57329
   2  17  -1   -0.42    1.62   0 0.84144-0.69598 0.30382 0.50343 0.46264-0.51748
   3 -10   7   -0.55    2.06   0 0.82892-0.61490 0.31773-0.78786 0.47600-0.08945
   3 -10   9    0.16    2.40   0 0.81271-0.59543 0.33482-0.80640 0.49229 0.00323
   3  -9   3  173.07    2.91   0 0.84397-0.63157 0.30093-0.72477 0.45984-0.29455
   3  -7   0   38.55    1.94   0 0.83945-0.62916 0.30608-0.63496 0.46482-0.46334
   3  -6  -1   62.13    2.11   0 0.83646-0.62714 0.30944-0.59090 0.46804-0.52155
   3  -5  -2   96.11    2.33   0 0.84116-0.63212 0.30415-0.53816 0.46295-0.57091
   3  -2  -4  296.11    3.06   0 0.84444-0.63617 0.30039-0.39245 0.45932-0.67624
   3  15  -4    6.43    2.34   0 0.82727-0.61652 0.31952 0.38976 0.47771-0.69037
   4 -11   6    0.44    1.64   0 0.83677-0.55150 0.30909-0.82741 0.46771-0.13620
   4 -11  10    3.22    2.57   0 0.81466-0.52437 0.33282-0.85138 0.49039 0.06024
   4 -10   3  286.01    3.33   0 0.83384-0.55085 0.31235-0.78360 0.47084-0.30460
   4  -9   1  108.77    2.29   0 0.83797-0.55650 0.30775-0.73123 0.46642-0.40937
   4  -4  -4   82.56    1.76   0 0.84329-0.56488 0.30171-0.48817 0.46060-0.67659
   4  -2  -5    5.20    1.68   0 0.83810-0.55953 0.30760-0.40141 0.46628-0.73562
   5 -12   6   16.71    1.86   0 0.84272-0.48626 0.30237-0.86811 0.46123-0.12852
   5 -12   7   44.11    2.30   0 0.83388-0.47621 0.31231-0.87862 0.47080-0.08361
   5 -12   8    1.34    1.86   0 0.82772-0.47073 0.31904-0.88436 0.47725-0.03425
   5 -12   9    3.56    2.15   0 0.82876-0.47032 0.31791-0.88445 0.47617 0.02112
   5 -11   3   61.23    2.14   0 0.83635-0.48275 0.30956-0.82827 0.46816-0.30037
   5 -10   1    4.13    1.86   0 0.83713-0.48516 0.30869-0.77990 0.46732-0.40900
   5  -8  -2   54.36    1.60   0 0.84923-0.49967 0.29482-0.67081 0.45393-0.55978
   5  -7  -3    1.42    1.22   0 0.85059-0.50094 0.29322-0.62331 0.45239-0.61165
   5  -4  -5  175.98    2.25   0 0.84444-0.49616 0.30039-0.48700 0.45932-0.72868
   5  -2  -6  251.20    2.70   0 0.84375-0.49558 0.30118-0.39332 0.46009-0.78365
   5   1  -7   40.32    2.04   0 0.84190-0.49381 0.30330-0.25420 0.46213-0.83999
   6 -12   3    6.62    1.33   0 0.84559-0.42187 0.29906-0.86429 0.45804-0.28864
   6 -11   1   13.50    1.41   0 0.84306-0.42035 0.30198-0.82021 0.46085-0.40036
   6  -9  -2    9.56    1.21   0 0.84923-0.42961 0.29482-0.71819 0.45393-0.55797
   6  -8  -3  118.71    1.98   0 0.84833-0.42862 0.29588-0.67174 0.45496-0.61422
   6  -5  -5    7.28    1.75   0 0.83659-0.41787 0.30930-0.54353 0.46790-0.73672
   6  -1  -7    5.89    1.88   0 0.83780-0.41866 0.30794-0.35378 0.46660-0.84405
   6   2  -8   34.69    1.69   0 0.84673-0.42847 0.29774-0.20179 0.45676-0.88780
   6   3  -8   40.60    2.13   0 0.83639-0.41831 0.30951-0.16660 0.46811-0.89964
   6  10  -8    1.88    2.12   0 0.82903-0.40922 0.31762 0.15486 0.47589-0.90438
   7 -13   4    6.44    1.41   0 0.84582-0.35028 0.29880-0.91136 0.45779-0.23065
   7 -13   5    3.12    1.89   0 0.83423-0.33801 0.31191-0.92479 0.47042-0.19053
   7 -12   2    1.85    1.65   0 0.83583-0.34166 0.31014-0.87541 0.46872-0.35318
   7 -11   0   23.57    1.90   0 0.83943-0.34660 0.30611-0.82420 0.46484-0.45782
   7  -6  -5    3.62    1.70   0 0.83649-0.34634 0.30941-0.59190 0.46801-0.73544
   7  -5  -6    0.85    1.20   0 0.84901-0.35955 0.29508-0.53015 0.45419-0.77541
   7  -3  -7    8.97    1.33   0 0.84742-0.35901 0.29694-0.43712 0.45599-0.83166
   7   0  -8   -0.17    1.77   0 0.84005-0.35215 0.30541-0.30640 0.46416-0.89066
   8 -13   3    0.28    1.89   0 0.83865-0.27374 0.30699-0.91932 0.46569-0.29310
   8 -12   1    0.28    1.80   0 0.83771-0.27363 0.30804-0.87665 0.46670-0.40459
   8 -11  -1    1.15    1.35   0 0.84329-0.28089 0.30171-0.81981 0.46060-0.50710
   8 -10  -2   -0.50    1.75   0 0.83724-0.27601 0.30857-0.78157 0.46720-0.56698
   8  -9  -3   18.07    1.70   0 0.83417-0.27259 0.31198-0.73547 0.47048-0.62737
   8  -8  -4    0.11    1.71   0 0.83677-0.27627 0.30909-0.68851 0.46771-0.67736
   8  -7  -5   43.83    1.91   0 0.84130-0.28129 0.30398-0.63262 0.46279-0.72815
   8  -6  -6    5.23    1.24   0 0.85149-0.29187 0.29215-0.57428 0.45136-0.77133
   8  -4  -7    0.36    1.20   0 0.84650-0.28726 0.29800-0.48834 0.45702-0.82999
   8  -2  -8    1.31    1.35   0 0.85127-0.29176 0.29242-0.38538 0.45161-0.88102
   8  -1  -8   10.48    1.84   0 0.83643-0.27817 0.30948-0.35515 0.46808-0.89771
   8   2  -9   -0.05    1.29   0 0.84605-0.28621 0.29853-0.20538 0.45753-0.94071
   8   3  -9   15.52    2.03   0 0.83759-0.27842 0.30818-0.16575 0.46683-0.95059
   9 -12   0    0.84    1.95   0 0.83960-0.20600 0.30591-0.86974 0.46464-0.45523
   9 -10  -3    2.88    1.33   0 0.84787-0.21597 0.29641-0.76696 0.45548-0.61032
   9  -9  -4    7.38    1.41   0 0.84764-0.21682 0.29668-0.71964 0.45574-0.66539
   9  -8  -5   21.64    1.62   0 0.85127-0.22035 0.29242-0.66830 0.45161-0.71607
   9  -6  -6   -1.87    1.78   0 0.83771-0.20760 0.30804-0.59200 0.46670-0.78370
   9  -5  -7    3.33    1.30   0 0.85127-0.22098 0.29242-0.52703 0.45161-0.82555
   9  -2  -8    9.05    1.97   0 0.83700-0.20745 0.30883-0.40166 0.46746-0.89620
   9   0  -9    1.63    1.46   0 0.85104-0.22094 0.29269-0.29082 0.45187-0.93499
   9   1  -9    0.17    1.96   0 0.83771-0.20813 0.30804-0.25792 0.46670-0.94723
  10  -9  -4    0.08    1.97   0 0.83829-0.13700 0.30738-0.73159 0.46607-0.67201
  10  -8  -5   -2.48    1.44   0 0.84214-0.14117 0.30303-0.68105 0.46187-0.72254
  10  -7  -6    0.05    1.46   0 0.84923-0.14862 0.29482-0.62598 0.45393-0.76952
  10  -5  -7   -0.84    1.66   0 0.83970-0.14087 0.30580-0.54085 0.46454-0.83277
  10  -3  -8    1.02    1.48   0 0.84237-0.14159 0.30277-0.44234 0.46162-0.88883
  -2   1   7   57.57    2.06   0 0.82203-0.95820 0.32456-0.27623 0.48303-0.10322
  -2   1   8   25.83    1.39   0 0.82834-0.96380 0.31779-0.26946 0.47657-0.04189
  -2   1   9   85.37    1.86   0 0.82931-0.96402 0.31675-0.26854 0.47557 0.01412
  -2   1  10   23.01    1.38   0 0.82641-0.96012 0.31988-0.27190 0.47856 0.06627
  -2   1  11   21.25    1.92   0 0.81978-0.95290 0.32694-0.27869 0.48529 0.11449
  -2   2   6   13.80    1.26   0 0.83051-0.96711 0.31544-0.21995 0.47432-0.14930
  -2   2  12   31.53    1.55   0 0.82472-0.95663 0.32170-0.22646 0.48030 0.17395
  -2   2  13    7.22    1.65   0 0.81387-0.94443 0.33309-0.23714 0.49113 0.21766
  -2   3   5   55.12    1.63   0 0.83027-0.96733 0.31570-0.17265 0.47457-0.20387
  -2   3  13    1.26    1.66   0 0.82252-0.95398 0.32404-0.18083 0.48253 0.22810
  -2   4   4    2.76    1.80   0 0.82081-0.95838 0.32585-0.13634 0.48426-0.26724
  -2   4  13    2.13    1.30   0 0.83003-0.96076 0.31596-0.12543 0.47482 0.23533
  -2   4  14    2.66    1.83   0 0.81806-0.94723 0.32874-0.13808 0.48701 0.27723
  -2   5   4  719.26    4.22   0 0.82955-0.96670 0.31649-0.07903 0.47532-0.25886
  -2   5  14    0.40    1.62   0 0.82203-0.95167 0.32456-0.08655 0.48303 0.28191
  -2   6  14    2.46    1.38   0 0.82423-0.95391 0.32222-0.03683 0.48080 0.28446
  -2   7  14    0.64    1.43   0 0.82496-0.95466 0.32144 0.01222 0.48005 0.28350
  -2   8   4   26.60    1.34   0 0.83122-0.96760 0.31465 0.06441 0.47357-0.25669
  -2   9   4   89.98    1.77   0 0.82641-0.96251 0.31988 0.10644 0.47856-0.26116
  -2   9  13    1.33    1.26   0 0.83146-0.96092 0.31439 0.11283 0.47331 0.23728
  -2  10   4    3.15    1.64   0 0.81884-0.95509 0.32793 0.14511 0.48623-0.26928
  -2  11   5   11.24    1.16   0 0.82447-0.95963 0.32196 0.19847 0.48055-0.20826
  -2  11  12    2.70    1.31   0 0.82883-0.95867 0.31727 0.20453 0.47607 0.18003
  -2  12   5    6.33    1.51   0 0.81394-0.94901 0.33301 0.23487 0.49106-0.21853
  -2  12   6   75.13    1.74   0 0.82374-0.95815 0.32274 0.24504 0.48129-0.15390
  -2  12   7    3.66    1.17   0 0.82979-0.96339 0.31622 0.25166 0.47507-0.09311
  -2  12   8    2.20    1.18   0 0.83265-0.96542 0.31308 0.25555 0.47206-0.03486
  -2  12  10    0.47    1.32   0 0.83098-0.96238 0.31492 0.25413 0.47382 0.07088
  -2  12  11   -1.50    1.37   0 0.82714-0.95768 0.31910 0.25016 0.47781 0.12155
  -2  13   7   15.61    1.76   0 0.81884-0.95237 0.32793 0.28667 0.48623-0.10451
  -2  13   8   -0.71    1.48   0 0.82019-0.95462 0.32650 0.29150 0.48488-0.04846
  -2  13   9    1.55    1.53   0 0.82034-0.95471 0.32635 0.29250 0.48473 0.00911
  -2  13  10    0.48    1.81   0 0.81982-0.95271 0.32689 0.29073 0.48525 0.06022
  -1  -3   8   35.33    2.17   0 0.81905-0.88490 0.32770-0.46826 0.48602-0.05024
  -1  -3   9   54.02    2.26   0 0.82185-0.88687 0.32475-0.46543 0.48321 0.00749
  -1  -3  10   20.49    1.91   0 0.81856-0.88245 0.32821-0.46858 0.48650 0.05907
  -1  -3  11    8.89    1.58   0 0.80972-0.87241 0.33733-0.47789 0.49516 0.10525
  -1  -2   5   14.55    2.03   0 0.81808-0.88569 0.32871-0.42185 0.48698-0.21603
  -1  -2  13    6.06    1.76   0 0.81724-0.87718 0.32959-0.42260 0.48782 0.22123
  -1  -1  14    2.88    1.78   0 0.82150-0.88181 0.32512-0.37131 0.48356 0.28196
  -1   0  15   -0.21    1.75   0 0.81970-0.88103 0.32702-0.32381 0.48537 0.33489
  -1   1   2 4638.62   15.78   0 0.82399-0.89297 0.32248-0.27375 0.48105-0.37383
  -1   3   1  285.81    3.98   0 0.82301-0.89232 0.32352-0.18019 0.48204-0.42885
  -1  10   1    5.20    1.21   0 0.83122-0.89932 0.31465 0.15936 0.47357-0.41813
  -1  11   1  206.64    2.87   0 0.81856-0.88624 0.32821 0.19223 0.48651-0.43185
  -1  13   2   28.13    2.11   0 0.81857-0.88473 0.32820 0.28650 0.48650-0.37651
  -1  14   3   22.24    1.76   0 0.82270-0.88865 0.32385 0.33795 0.48235-0.31752
  -1  15   4    0.23    1.89   0 0.81982-0.88521 0.32689 0.38428 0.48525-0.26806
  -1  16   5   23.73    2.02   0 0.81767-0.87994 0.32915 0.42640 0.48739-0.21291
  -1  16   6    2.32    1.40   0 0.82472-0.88705 0.32170 0.43614 0.48030-0.15118
  -1  16   7    0.85    1.44   0 0.82979-0.89154 0.31622 0.44196 0.47507-0.09117
   0  -5  12    9.13    1.89   0 0.81706-0.80771 0.32978-0.56456 0.48800 0.16818
   0  -4  14    8.88    1.88   0 0.81806-0.80741 0.32874-0.51617 0.48701 0.27908
   0  -3  15   15.75    1.85   0 0.82624-0.81509 0.32007-0.46099 0.47874 0.34255
   0  12  -1    8.91    1.65   0 0.81371-0.81156 0.33325 0.23413 0.49129-0.54474
   0  14   0    1.73    1.69   0 0.81809-0.81381 0.32870 0.33227 0.48697-0.48502
   0  15   1    4.62    1.32   0 0.82617-0.82211 0.32014 0.38929 0.47881-0.42278
   0  16   2   33.32    1.62   0 0.82834-0.82420 0.31779 0.43817 0.47657-0.36493
   0  17   3   38.05    1.75   0 0.82496-0.81938 0.32144 0.48281 0.48005-0.31382
   1  -7  12    0.20    2.37   0 0.80426-0.72491 0.34282-0.67122 0.50035 0.15587
   1  -6  14    0.64    1.86   0 0.81802-0.73814 0.32878-0.61116 0.48705 0.28028
   1  -4   1 1046.63    8.19   0 0.81677-0.74637 0.33008-0.51750 0.48828-0.43458
   1  -3   0   86.22    2.83   0 0.82447-0.75458 0.32196-0.46172 0.48055-0.48158
   1  11  -3   20.40    2.21   0 0.81123-0.74026 0.33579 0.18480 0.49370-0.65558
   1  17   0   15.64    1.99   0 0.81424-0.73988 0.33270 0.47072 0.49077-0.48676
   2  -6   1    2.33    1.41   0 0.82496-0.68439 0.32144-0.60391 0.48005-0.42437
   2  -5   0  217.51    3.29   0 0.81794-0.67790 0.32887-0.56330 0.48713-0.48712
   2  -4  -1   20.11    1.61   0 0.82399-0.68470 0.32248-0.50896 0.48105-0.53574
   2  -1  -3    4.90    1.60   0 0.82931-0.69158 0.31675-0.36276 0.47557-0.63720
   3 -10   8   12.16    2.20   0 0.81444-0.59666 0.33249-0.80411 0.49057-0.05105
   3  -9   4  138.17    2.87   0 0.81136-0.59797 0.33566-0.75975 0.49357-0.27365
   3  -8   2   17.16    1.85   0 0.81386-0.60224 0.33310-0.71009 0.49115-0.38042
   3  -3  -3  319.65    3.41   0 0.81556-0.60696 0.33134-0.47097 0.48948-0.65202
   3   1  -5    9.05    1.47   0 0.82786-0.61976 0.31831-0.26908 0.47707-0.74776
   3  17  -3    0.21    1.69   0 0.81437-0.60094 0.33257 0.47284 0.49065-0.64981
   4 -11   7    0.54    1.69   0 0.82236-0.53617 0.32421-0.84200 0.48270-0.09665
   4 -11   8   15.48    2.05   0 0.81440-0.52637 0.33254-0.85159 0.49061-0.05062
   4 -11   9    0.92    2.27   0 0.80988-0.52122 0.33716-0.85565 0.49500 0.00032
   4  -8   0   11.99    1.23   0 0.82399-0.54304 0.32248-0.69889 0.48105-0.47865
   4  -7  -1   90.18    2.09   0 0.81796-0.53786 0.32884-0.65786 0.48710-0.53956
   4  -6  -2   79.28    2.02   0 0.81893-0.53940 0.32782-0.60931 0.48614-0.59298
   4  -5  -3  343.66    2.94   0 0.82786-0.54890 0.31831-0.55246 0.47707-0.63871
   4   1  -6    5.16    1.27   0 0.82931-0.55061 0.31675-0.26810 0.47557-0.79991
   5 -11   4   13.35    1.80   0 0.81426-0.45970 0.33268-0.85145 0.49075-0.26797
   5  -9   0   94.32    2.23   0 0.82198-0.47053 0.32462-0.74826 0.48308-0.47966
   5  -8  -1  221.81    2.69   0 0.81362-0.46274 0.33334-0.70959 0.49138-0.54255
   5  -6  -3   32.16    1.81   0 0.81734-0.46826 0.32949-0.61120 0.48772-0.64836
   5  -5  -4    1.32    1.21   0 0.82786-0.47811 0.31831-0.55405 0.47707-0.69147
   5  -3  -5   69.80    2.04   0 0.81732-0.46884 0.32951-0.46948 0.48774-0.75738
   5  -1  -6  116.79    2.39   0 0.82038-0.47182 0.32630-0.37165 0.48469-0.80819
   5   2  -7    1.72    1.23   0 0.82496-0.47592 0.32144-0.22608 0.48005-0.85784
   5  11  -7    1.69    2.53   0 0.79374-0.44392 0.35312 0.16705 0.51004-0.88584
   6 -12   4    1.00    1.28   0 0.82786-0.40283 0.31831-0.88368 0.47707-0.25298
   6 -12   5    2.73    1.63   0 0.81347-0.38708 0.33350-0.90069 0.49152-0.21284
   6 -11   2   24.93    1.89   0 0.81998-0.39616 0.32672-0.84528 0.48509-0.37053
   6 -10   0    2.52    1.26   0 0.82810-0.40569 0.31805-0.78946 0.47682-0.47153
   6  -9  -1    7.79    1.71   0 0.81849-0.39671 0.32828-0.75232 0.48657-0.53609
   6  -8  -2    7.73    1.73   0 0.81462-0.39343 0.33231-0.70868 0.49040-0.59521
   6  -7  -3   79.98    2.10   0 0.81685-0.39714 0.33000-0.65918 0.48821-0.64775
   6  -6  -4    7.73    1.20   0 0.82350-0.40361 0.32300-0.60459 0.48154-0.69560
   6  -3  -6  119.57    2.07   0 0.83027-0.41172 0.31570-0.45563 0.47457-0.79732
   6   0  -7    0.34    1.83   0 0.81809-0.39913 0.32870-0.33060 0.48697-0.86242
   6   4  -8   11.84    1.43   0 0.82544-0.40716 0.32092-0.13139 0.47956-0.91023
   6   5  -8   38.72    2.22   0 0.81757-0.39863 0.32925-0.09245 0.48749-0.91850
   6   6  -8    0.21    1.83   0 0.81161-0.39195 0.33540-0.05070 0.49333-0.92436
   6   7  -8   11.41    1.79   0 0.80909-0.38979 0.33797-0.00688 0.49576-0.92642
   6   8  -8    2.99    1.80   0 0.81157-0.39157 0.33545 0.04366 0.49337-0.92445
   6   9  -8    3.62    1.89   0 0.81807-0.39814 0.32873 0.09721 0.48700-0.91735
   7 -12   3   27.01    1.91   0 0.81691-0.32193 0.32993-0.89560 0.48814-0.31807
   7 -11   1   15.27    1.84   0 0.81644-0.32301 0.33042-0.84876 0.48861-0.42836
   7 -10  -1   -0.32    1.19   0 0.82931-0.33791 0.31675-0.78934 0.47557-0.52177
   7  -9  -2    3.31    1.18   0 0.82350-0.33224 0.32300-0.74679 0.48154-0.58471
   7  -8  -3   44.95    1.55   0 0.82277-0.33212 0.32378-0.70003 0.48228-0.64035
   7  -7  -4   51.05    1.64   0 0.82690-0.33698 0.31936-0.64825 0.47806-0.69069
   7  -4  -6   23.86    1.42   0 0.82641-0.33736 0.31988-0.50715 0.47856-0.80014
   7  -2  -7    1.32    1.21   0 0.82834-0.33861 0.31779-0.41123 0.47657-0.85290
   7   1  -8   11.03    1.47   0 0.82810-0.33948 0.31805-0.26942 0.47682-0.90715
   7   2  -8   22.61    2.07   0 0.81414-0.32539 0.33281-0.23733 0.49087-0.92090
   8 -12   2    3.58    1.77   0 0.81661-0.25116 0.33025-0.89698 0.48844-0.37244
   8 -11   0   14.35    1.90   0 0.81994-0.25629 0.32677-0.84476 0.48513-0.47767
   8  -6  -5   72.55    2.13   0 0.81743-0.25766 0.32940-0.61185 0.48763-0.75400
   8  -5  -6    1.78    1.23   0 0.82979-0.26919 0.31622-0.55121 0.47507-0.79582
   8  -3  -7    0.76    1.24   0 0.82738-0.26711 0.31883-0.45923 0.47756-0.85281
   8   0  -8    7.42    1.89   0 0.82056-0.26113 0.32611-0.32453 0.48451-0.91404
   8   4  -9    1.45    1.42   0 0.82979-0.26943 0.31622-0.12546 0.47507-0.95908
   8   5  -9   14.06    1.92   0 0.82399-0.26414 0.32248-0.08617 0.48105-0.96466
   8   6  -9    1.84    2.03   0 0.81907-0.25857 0.32768-0.04249 0.48600-0.96884
   8   7  -9    0.52    2.08   0 0.81838-0.25764 0.32841 0.00411 0.48669-0.96982
   8   8  -9    0.91    2.06   0 0.82042-0.25928 0.32626 0.05372 0.48464-0.96773
   9 -12   1    2.50    1.90   0 0.81894-0.18414 0.32782-0.89045 0.48613-0.42284
   9 -11  -1    0.38    1.48   0 0.82979-0.19702 0.31622-0.83558 0.47507-0.51922
   9 -10  -2    3.25    1.31   0 0.82301-0.18974 0.32352-0.79425 0.48204-0.58311
   9  -9  -3   -0.89    1.73   0 0.81945-0.18800 0.32728-0.75133 0.48562-0.63818
   9  -8  -4    1.55    1.68   0 0.82228-0.19009 0.32430-0.70059 0.48278-0.69313
   9  -7  -5    1.81    1.26   0 0.82810-0.19645 0.31805-0.64715 0.47682-0.74183
   9  -5  -6    0.08    1.73   0 0.81723-0.18608 0.32961-0.56775 0.48783-0.80657
   9  -4  -7    0.34    1.25   0 0.83241-0.20204 0.31334-0.50360 0.47231-0.84466
   9  -3  -7   13.23    1.71   0 0.81362-0.18379 0.33334-0.47425 0.49138-0.86524
   9  -1  -8   -0.57    1.90   0 0.81958-0.18953 0.32715-0.37532 0.48549-0.91128
   9   2  -9    0.97    1.48   0 0.82955-0.19884 0.31649-0.22009 0.47532-0.95854
   9   3  -9    2.48    2.06   0 0.82007-0.18915 0.32663-0.18288 0.48500-0.96803
   9   4  -9    2.32    1.80   0 0.81270-0.18155 0.33429-0.14339 0.49227-0.97588
  10  -8  -4    4.52    1.73   0 0.81489-0.11134 0.33203-0.70887 0.49013-0.70040
  10  -7  -5    6.50    1.96   0 0.81933-0.11665 0.32741-0.65646 0.48574-0.74907
  10  -6  -6   -0.20    1.32   0 0.82907-0.12763 0.31701-0.60142 0.47582-0.79244
  10  -4  -7    6.91    1.38   0 0.82325-0.12219 0.32326-0.51023 0.48179-0.85465
  10  -2  -8    0.39    1.44   0 0.82690-0.12579 0.31936-0.41492 0.47806-0.90418
  -3   6   9   19.60    1.63   0 0.79535-0.99802 0.35131-0.06691 0.50884-0.01938
  -3   6  10    1.60    1.50   0 0.79330-0.99670 0.35329-0.06873 0.51069 0.03446
  -3   7   8    0.43    1.39   0 0.79475-0.99806 0.35189-0.02099 0.50938-0.07461
  -3   7   9    3.89    1.55   0 0.79734-0.99990 0.34937-0.01790 0.50702-0.01728
  -3   7  10    4.01    1.59   0 0.79685-0.99857 0.34985-0.01837 0.50747 0.03689
  -3   8   8   -0.70    1.46   0 0.79356-0.99774 0.35303 0.02580 0.51046-0.07476
  -3   8   9    4.55    1.56   0 0.79741-0.99943 0.34930 0.02938 0.50696-0.01773
  -3   8  10    4.93    1.64   0 0.79722-0.99809 0.34949 0.02932 0.50713 0.03732
  -3   9   9   15.33    1.60   0 0.79450-0.99691 0.35213 0.07415 0.50961-0.01998
  -3   9  10   -0.21    1.46   0 0.79330-0.99579 0.35329 0.07322 0.51069 0.03465
  -2   0   7   -0.37    1.71   0 0.79461-0.93066 0.35202-0.35169 0.50951-0.12833
  -2   0   8  108.30    2.08   0 0.80443-0.94004 0.34238-0.34117 0.50044-0.06596
  -2   0   9    1.74    1.19   0 0.80775-0.94240 0.33906-0.33839 0.49730-0.00677
  -2   0  10    0.53    1.12   0 0.80597-0.93987 0.34085-0.34005 0.49899 0.04629
  -2   0  11   -0.39    1.61   0 0.79773-0.93231 0.34899-0.34866 0.50666 0.09487
  -2   0  12    0.38    1.54   0 0.79464-0.92479 0.35199-0.35036 0.50948 0.14285
  -2   1   6    6.33    1.30   0 0.80851-0.94542 0.33829-0.28978 0.49658-0.17113
  -2   1  12    0.93    1.24   0 0.81103-0.94293 0.33573-0.28725 0.49415 0.16052
  -2   1  13    1.73    1.68   0 0.79877-0.93009 0.34798-0.29940 0.50571 0.20386
  -2   2   5    3.00    1.26   0 0.81229-0.94961 0.33444-0.23889 0.49294-0.22208
  -2   2  14   -0.33    1.68   0 0.79838-0.92998 0.34836-0.25106 0.50607 0.25785
  -2   3   4  401.97    3.48   0 0.80571-0.94338 0.34110-0.19807 0.49924-0.28332
  -2   3  14    2.23    1.35   0 0.80977-0.94001 0.33701-0.19362 0.49537 0.26928
  -2   3  15    1.38    1.82   0 0.79516-0.92375 0.35149-0.20796 0.50901 0.31001
  -2   4  15    1.43    1.63   0 0.80238-0.93162 0.34442-0.15354 0.50236 0.31713
  -2   5   3  481.55    3.91   0 0.80048-0.93862 0.34630-0.10874 0.50413-0.34268
  -2   6   3  340.29    3.05   0 0.80775-0.94552 0.33906-0.05433 0.49730-0.33564
  -2   7   3   32.21    1.35   0 0.81027-0.94768 0.33650-0.00445 0.49488-0.33311
  -2   8   3    0.60    1.04   0 0.80876-0.94654 0.33803 0.04063 0.49634-0.33325
  -2   9   3  162.41    2.19   0 0.80443-0.94171 0.34238 0.08383 0.50044-0.33833
  -2  10   3  142.67    2.44   0 0.79822-0.93498 0.34851 0.12501 0.50621-0.34381
  -2  11   4   69.12    1.66   0 0.80977-0.94593 0.33701 0.18354 0.49537-0.27805
  -2  12   4   11.35    1.68   0 0.79926-0.93515 0.34750 0.22020 0.50526-0.28745
  -2  13   5   25.46    1.81   0 0.80177-0.93692 0.34503 0.26989 0.50293-0.23029
  -2  13   6    9.55    1.34   0 0.81204-0.94659 0.33470 0.28021 0.49318-0.16545
  -2  14   6    3.83    1.67   0 0.79879-0.93321 0.34795 0.31537 0.50569-0.17764
  -2  14   7   13.66    1.35   0 0.80622-0.93976 0.34059 0.32185 0.49875-0.11630
  -2  14   8    4.19    1.25   0 0.81027-0.94282 0.33650 0.32626 0.49488-0.05783
  -2  14   9    9.18    1.35   0 0.81128-0.94361 0.33547 0.32683 0.49391-0.00107
  -2  15   7    7.75    1.65   0 0.79479-0.92583 0.35185 0.35631 0.50935-0.12697
  -2  15   8    0.78    1.81   0 0.79773-0.92930 0.34899 0.36102 0.50666-0.06923
  -1  -3   7  216.74    3.70   0 0.80562-0.87219 0.34119-0.48154 0.49932-0.11866
  -1  -3  12    3.08    1.71   0 0.79771-0.85911 0.34902-0.48910 0.50669 0.14823
  -1  -2  14    5.11    1.85   0 0.79746-0.85680 0.34925-0.44217 0.50691 0.25757
  -1  -1  15    1.49    1.78   0 0.79942-0.85983 0.34734-0.39350 0.50511 0.31609
  -1   6   0    6.75    1.94   0 0.79743-0.86682 0.34928-0.06474 0.50694-0.50770
  -1   7   0  209.96    3.33   0 0.80199-0.87114 0.34481-0.01279 0.50273-0.50371
  -1   8   0   72.44    2.32   0 0.80084-0.86982 0.34594 0.03338 0.50380-0.50462
  -1   9   0   55.43    2.11   0 0.79649-0.86464 0.35020 0.07595 0.50780-0.50849
  -1  12   1    0.61    1.65   0 0.80418-0.87168 0.34264 0.22521 0.50068-0.44553
  -1  14   2   21.43    1.84   0 0.80040-0.86699 0.34638 0.31577 0.50421-0.39437
  -1  15   3   37.15    1.55   0 0.80469-0.87061 0.34212 0.36680 0.50020-0.33552
  -1  16   4   -0.12    1.58   0 0.80058-0.86608 0.34620 0.41381 0.50404-0.28662
  -1  17   5   -0.55    1.86   0 0.79799-0.86061 0.34874 0.45554 0.50642-0.23170
   0  -5  13    0.15    1.81   0 0.79040-0.78108 0.35606-0.59108 0.51329 0.19786
   0  -4  15    6.34    1.75   0 0.78935-0.77782 0.35706-0.54489 0.51423 0.30605
   0   2  -1 1536.56   20.48   0 0.77813-0.77869 0.36753-0.27103 0.52399-0.57946
   0   7  -2  760.86    7.00   0 0.79521-0.79497 0.35144-0.01976 0.50896-0.61809
   0   8  -2  412.24    5.00   0 0.79492-0.79438 0.35172 0.02715 0.50923-0.61818
   0   9  -2  203.82    3.74   0 0.78597-0.78552 0.36025 0.06613 0.51721-0.62622
   0  13  -1    9.85    1.71   0 0.79040-0.78894 0.35606 0.25866 0.51329-0.56670
   0  15   0    0.55    1.62   0 0.79737-0.79225 0.34934 0.35594 0.50699-0.50389
   0  16   1    3.05    1.76   0 0.80238-0.79861 0.34442 0.41245 0.50236-0.44574
   0  17   2   41.68    1.99   0 0.80455-0.80037 0.34226 0.46225 0.50033-0.38816
   1  -7   7   90.33    5.28   0 0.69679-0.61936 0.43408-0.76409 0.58449-0.20216
   1  -6   4   16.14    2.53   0 0.78755-0.71478 0.35877-0.64117 0.51582-0.29817
   1  14  -2   20.82    1.79   0 0.80673-0.73524 0.34008 0.32194 0.49827-0.60471
   1  16  -1    3.83    1.74   0 0.80135-0.72900 0.34544 0.41031 0.50332-0.55521
   2  -8   5    3.24    1.84   0 0.79683-0.65304 0.34987-0.72674 0.50749-0.23361
   2  -7   3  571.39    5.37   0 0.79173-0.64950 0.35479-0.68442 0.51211-0.34804
   2   2  -4   16.20    1.69   0 0.80952-0.67104 0.33727-0.24073 0.49561-0.71259
   2  15  -3   25.88    2.14   0 0.80324-0.66216 0.34357 0.36556 0.50156-0.66132
   2  17  -2   -0.19    1.75   0 0.79617-0.65114 0.35051 0.45277 0.50809-0.61543
   3  -7   1   56.46    2.08   0 0.79224-0.58098 0.35430-0.68363 0.51164-0.45565
   3  -4  -2  108.82    2.50   0 0.79440-0.58524 0.35222-0.53925 0.50970-0.61761
   3  -1  -4  319.98    3.30   0 0.80851-0.60003 0.33829-0.38343 0.49658-0.71316
   3   2  -5    1.14    1.95   0 0.79767-0.58879 0.34905-0.25418 0.50672-0.77729
   3  13  -5    6.27    3.07   0 0.77575-0.56459 0.36970 0.24477 0.52600-0.79509
   4 -10   4    0.40    1.15   0 0.80647-0.52234 0.34034-0.81208 0.49851-0.27661
   4  -9   2   22.35    1.44   0 0.80469-0.52235 0.34213-0.76614 0.50020-0.38840
   4  -3  -4  670.52    4.09   0 0.81002-0.53135 0.33675-0.47647 0.49512-0.71088
   4  -1  -5   15.47    1.35   0 0.80952-0.53109 0.33727-0.38251 0.49561-0.76585
   4   2  -6  297.12    3.26   0 0.80698-0.52857 0.33983-0.24354 0.49803-0.82214
   5 -11   5    0.75    1.70   0 0.79251-0.43681 0.35404-0.87274 0.51140-0.23381
   5 -10   2    8.83    1.40   0 0.80876-0.45624 0.33803-0.80920 0.49634-0.38303
   5  -7  -2   65.93    1.62   0 0.81229-0.46224 0.33444-0.66351 0.49294-0.59885
   5  -4  -4  116.45    2.27   0 0.79503-0.44591 0.35162-0.53884 0.50913-0.72392
   5   0  -6   -0.82    1.71   0 0.79669-0.44753 0.35000-0.34943 0.50761-0.83131
   5   3  -7    1.42    1.35   0 0.80901-0.45989 0.33778-0.19528 0.49609-0.87381
   5   4  -7  171.89    3.07   0 0.79416-0.44562 0.35246-0.16244 0.50992-0.88755
   6 -12   6    6.01    1.92   0 0.79685-0.37006 0.34985-0.91549 0.50747-0.17434
   6 -11   3   19.47    1.80   0 0.79685-0.37229 0.34985-0.86871 0.50747-0.33844
   6 -10   1   73.10    2.22   0 0.79973-0.37644 0.34704-0.81826 0.50483-0.44492
   6  -4  -5   24.32    1.40   0 0.80901-0.38975 0.33778-0.52522 0.49609-0.76454
   6  -2  -6   12.69    1.39   0 0.80647-0.38818 0.34034-0.43350 0.49851-0.82081
   6   1  -7    8.41    1.86   0 0.79925-0.38029 0.34750-0.29927 0.50526-0.88188
   7 -12   4   23.25    2.02   0 0.79818-0.30169 0.34856-0.91443 0.50625-0.28075
   7 -11   2   24.80    1.76   0 0.79240-0.29756 0.35415-0.87288 0.51150-0.39600
   7 -10   0    1.89    1.74   0 0.80134-0.30798 0.34545-0.81643 0.50333-0.49710
   7  -9  -1   12.77    1.63   0 0.79251-0.29981 0.35404-0.77816 0.51140-0.55992
   7  -6  -4    4.05    1.63   0 0.79775-0.30661 0.34897-0.63164 0.50664-0.71918
   7  -5  -5    9.46    1.24   0 0.81002-0.32001 0.33675-0.57216 0.49512-0.76218
   7  -3  -6    2.30    1.22   0 0.80290-0.31268 0.34391-0.48472 0.50188-0.82334
   7  -1  -7   11.36    1.34   0 0.80851-0.31980 0.33829-0.38445 0.49658-0.87213
   7   3  -8    5.36    1.85   0 0.80092-0.31117 0.34587-0.20317 0.50372-0.93364
   7  11  -8    2.76    2.33   0 0.78904-0.29754 0.35735 0.16356 0.51450-0.94424
   8 -12   3   -0.50    1.87   0 0.79669-0.23186 0.35000-0.91636 0.50761-0.33473
   8 -11   1    0.70    1.88   0 0.79661-0.23178 0.35009-0.86831 0.50769-0.44596
   8 -10  -1    3.91    1.41   0 0.81002-0.24646 0.33675-0.80800 0.49512-0.54226
   8  -9  -2   -1.17    1.27   0 0.80469-0.24288 0.34212-0.76752 0.50020-0.59994
   8  -8  -3    0.95    1.27   0 0.80418-0.24189 0.34264-0.71940 0.50068-0.65749
   8  -7  -4   28.78    1.55   0 0.80825-0.24754 0.33855-0.66779 0.49682-0.70817
   8  -4  -6   -1.26    1.25   0 0.80698-0.24673 0.33983-0.53037 0.49803-0.81659
   8  -2  -7    7.28    1.38   0 0.80800-0.24864 0.33880-0.43249 0.49706-0.87182
   8   1  -8   11.34    1.44   0 0.80546-0.24539 0.34136-0.29297 0.49948-0.92864
   9 -11   0    7.20    1.50   0 0.80698-0.17275 0.33983-0.85825 0.49803-0.48917
   9 -10  -1   -0.09    1.80   0 0.79747-0.16431 0.34924-0.82166 0.50690-0.55120
   9  -7  -4   -0.42    1.74   0 0.79565-0.16320 0.35101-0.68035 0.50856-0.71912
   9  -6  -5    3.66    1.29   0 0.80392-0.17195 0.34289-0.62504 0.50092-0.76599
   9  -4  -6   10.01    1.66   0 0.79382-0.16346 0.35278-0.54021 0.51022-0.82959
   9  -2  -7    0.32    1.77   0 0.79408-0.16309 0.35253-0.44547 0.50998-0.88406
   9   0  -8    1.43    1.42   0 0.80571-0.17484 0.34110-0.33960 0.49924-0.92775
   9   5  -9   -0.61    1.36   0 0.80546-0.17388 0.34136-0.10618 0.49948-0.98181
   9   6  -9    1.11    2.02   0 0.79773-0.16734 0.34899-0.06380 0.50666-0.98638
  10  -9  -3    1.51    1.32   0 0.81254-0.10891 0.33419-0.75762 0.49269-0.64747
  10  -6  -5    2.37    1.91   0 0.79617-0.09355 0.35051-0.63231 0.50809-0.77221
  10  -5  -6    2.09    1.33   0 0.80800-0.10584 0.33880-0.57339 0.49706-0.81560
  10  -3  -7    3.16    1.37   0 0.80495-0.10315 0.34187-0.48191 0.49996-0.87297
  10  -1  -8   -1.32    1.46   0 0.81204-0.11061 0.33470-0.38343 0.49318-0.91958
  10   0  -8    1.97    1.90   0 0.79728-0.09564 0.34943-0.34770 0.50708-0.93502
  -3   4   8   37.31    1.74   0 0.77610-0.98152 0.36887-0.17903 0.52566-0.09193
  -3   4   9   33.11    1.76   0 0.77980-0.98499 0.36549-0.17562 0.52251-0.03371
  -3   4  10   -0.24    1.48   0 0.77841-0.98441 0.36676-0.17621 0.52370 0.02164
  -3   4  11   13.38    1.87   0 0.77742-0.98077 0.36767-0.17788 0.52454 0.07430
  -3   4  12   11.66    1.68   0 0.77280-0.97415 0.37187-0.18194 0.52844 0.12486
  -3   5   7   66.85    2.00   0 0.77719-0.98321 0.36788-0.13069 0.52474-0.14579
  -3   5   8  111.78    1.90   0 0.78526-0.99045 0.36041-0.12330 0.51778-0.08377
  -3   5   9    5.68    1.18   0 0.78845-0.99309 0.35740-0.12092 0.51497-0.02572
  -3   5  10   13.72    1.18   0 0.78845-0.99230 0.35740-0.12007 0.51497 0.02897
  -3   5  11    3.50    1.22   0 0.78526-0.98823 0.36041-0.12310 0.51778 0.08170
  -3   5  12    1.21    1.85   0 0.77861-0.98139 0.36658-0.12931 0.52353 0.13117
  -3   5  13    2.22    1.60   0 0.77341-0.97251 0.37132-0.13437 0.52793 0.17870
  -3   6   6  154.31    2.31   0 0.77235-0.97826 0.37228-0.08752 0.52882-0.20402
  -3   6   7   27.70    1.35   0 0.78366-0.98941 0.36191-0.07751 0.51918-0.13957
  -3   6   8   10.40    1.15   0 0.79057-0.99565 0.35539-0.07128 0.51309-0.07905
  -3   6  11    1.06    1.18   0 0.78977-0.99265 0.35615-0.07172 0.51379 0.08601
  -3   6  12   34.86    1.50   0 0.78419-0.98607 0.36141-0.07729 0.51871 0.13504
  -3   6  13    0.85    1.80   0 0.77558-0.97704 0.36935-0.08446 0.52610 0.18309
  -3   7   6   18.39    1.64   0 0.77610-0.98187 0.36887-0.03731 0.52566-0.20073
  -3   7   7    1.18    1.11   0 0.78686-0.99234 0.35891-0.02769 0.51637-0.13554
  -3   7  11    1.44    1.24   0 0.79188-0.99458 0.35413-0.02236 0.51191 0.08803
  -3   7  12    0.47    1.16   0 0.78633-0.98836 0.35941-0.02696 0.51684 0.13617
  -3   7  13   -1.98    1.74   0 0.77719-0.97977 0.36788-0.03477 0.52474 0.18363
  -3   8   6   -0.91    1.58   0 0.77610-0.98232 0.36887 0.00936 0.52566-0.20075
  -3   8   7   28.07    1.29   0 0.78686-0.99222 0.35891 0.02021 0.51637-0.13621
  -3   8  11    3.08    1.20   0 0.79188-0.99433 0.35413 0.02497 0.51191 0.08812
  -3   8  12    0.56    1.20   0 0.78659-0.98830 0.35916 0.02055 0.51661 0.13636
  -3   8  13   -0.16    1.74   0 0.77732-0.98005 0.36776 0.01282 0.52462 0.18398
  -3   9   6    0.87    1.53   0 0.77447-0.98056 0.37036 0.05576 0.52704-0.20079
  -3   9   7   69.98    1.58   0 0.78473-0.98984 0.36091 0.06514 0.51824-0.13821
  -3   9   8    0.37    1.12   0 0.79083-0.99511 0.35514 0.07068 0.51285-0.07862
  -3   9  11    2.77    1.18   0 0.78977-0.99215 0.35615 0.07035 0.51379 0.08642
  -3   9  12    1.39    1.21   0 0.78446-0.98615 0.36116 0.06548 0.51848 0.13654
  -3  10   7   31.36    1.63   0 0.78041-0.98538 0.36492 0.10842 0.52198-0.14176
  -3  10   8   27.31    1.37   0 0.78659-0.99070 0.35916 0.11420 0.51661-0.08112
  -3  10   9    1.13    1.17   0 0.78898-0.99263 0.35690 0.11669 0.51450-0.02369
  -3  10  10    9.40    1.21   0 0.78898-0.99167 0.35690 0.11674 0.51450 0.03064
  -3  10  11    2.64    1.26   0 0.78606-0.98821 0.35966 0.11418 0.51708 0.08325
  -3  10  12    1.69    1.60   0 0.78124-0.98248 0.36415 0.10973 0.52127 0.13373
  -3  11   7   -1.04    1.55   0 0.77515-0.97897 0.36974 0.15017 0.52647-0.14722
  -3  11   8    8.64    1.49   0 0.78006-0.98456 0.36524 0.15511 0.52228-0.08657
  -3  11   9   10.11    1.26   0 0.78339-0.98660 0.36216 0.15830 0.51941-0.02925
  -3  11  10    5.37    1.30   0 0.78339-0.98601 0.36216 0.15797 0.51941 0.02522
  -3  11  11    1.36    1.62   0 0.77622-0.98278 0.36876 0.15619 0.52556 0.07821
  -3  12   8   16.67    1.74   0 0.77441-0.97647 0.37041 0.19716 0.52709-0.09112
  -3  12   9    2.80    1.72   0 0.77637-0.97883 0.36863 0.19947 0.52543-0.03497
  -3  12  10    2.37    1.71   0 0.77607-0.97846 0.36890 0.19963 0.52568 0.01991
  -3  12  11    9.02    1.85   0 0.77547-0.97547 0.36945 0.19819 0.52619 0.07338
  -2  -1   8   25.49    1.78   0 0.76983-0.90529 0.37454-0.42041 0.53091-0.09665
  -2  -1   9   85.79    2.32   0 0.77634-0.91134 0.36866-0.41485 0.52546-0.03597
  -2  -1  10   20.67    1.75   0 0.77662-0.91118 0.36840-0.41447 0.52522 0.01893
  -2  -1  11   19.15    1.75   0 0.77502-0.90709 0.36986-0.41564 0.52657 0.07291
  -2   0   6    8.28    1.91   0 0.77597-0.91231 0.36900-0.36816 0.52578-0.20074
  -2   0  13    0.79    1.71   0 0.77753-0.91006 0.36757-0.36698 0.52445 0.18580
  -2   1   5   94.97    2.10   0 0.78366-0.92134 0.36191-0.31343 0.51918-0.24900
  -2   1  14    0.55    1.24   0 0.78419-0.91487 0.36141-0.31307 0.51871 0.24572
  -2   2   4   17.40    1.91   0 0.78066-0.91885 0.36469-0.26894 0.52177-0.30600
  -2   2  15    2.06    1.37   0 0.78258-0.91249 0.36291-0.26714 0.52011 0.29936
  -2   4   3  161.82    2.44   0 0.78712-0.92546 0.35866-0.16839 0.51614-0.35483
  -2   7   2   77.83    2.15   0 0.77545-0.91335 0.36947-0.03735 0.52621-0.41891
  -2   8   2  344.03    3.25   0 0.77606-0.91412 0.36891 0.01039 0.52570-0.41823
  -2   9   2    0.55    1.57   0 0.77458-0.91219 0.37025 0.05494 0.52694-0.41843
  -2  11   3   37.35    1.47   0 0.78898-0.92584 0.35690 0.16353 0.51450-0.35168
  -2  12   3    5.66    1.72   0 0.77792-0.91487 0.36721 0.20002 0.52411-0.36116
  -2  13   4   42.10    1.51   0 0.78633-0.92246 0.35941 0.25523 0.51684-0.29888
  -2  14   4    4.44    1.69   0 0.77408-0.90848 0.37071 0.29079 0.52737-0.30879
  -2  14   5    8.84    1.35   0 0.78792-0.92332 0.35790 0.30395 0.51544-0.24220
  -2  15   5   45.92    2.11   0 0.77480-0.90807 0.37006 0.33879 0.52676-0.25319
  -2  15   6   11.88    1.44   0 0.78473-0.91890 0.36091 0.34863 0.51824-0.18957
  -1  -3   6  123.57    3.24   0 0.77496-0.84149 0.36991-0.51024 0.52662-0.20054
  -1  -3  13   13.01    1.76   0 0.77871-0.84042 0.36649-0.50723 0.52344 0.18663
  -1  -2  15    0.15    1.89   0 0.77610-0.83464 0.36887-0.46143 0.52566 0.29300
  -1   2   1    6.25    2.87   0 0.77719-0.84671 0.36788-0.27228 0.52474-0.47187
  -1   5   0  202.71    3.44   0 0.78224-0.85186 0.36323-0.12554 0.52041-0.52179
  -1  10   0   48.84    1.67   0 0.78659-0.85497 0.35916 0.11418 0.51661-0.51708
  -1  11   0  174.45    2.81   0 0.77529-0.84322 0.36961 0.15108 0.52635-0.52655
  -1  13   1   36.43    1.52   0 0.78712-0.85459 0.35866 0.25630 0.51614-0.46124
  -1  14   1    5.36    1.58   0 0.76933-0.83663 0.37498 0.28684 0.53132-0.47581
  -1  15   2    0.82    1.61   0 0.78028-0.84712 0.36504 0.34555 0.52209-0.41200
  -1  16   3   52.42    1.73   0 0.78473-0.85097 0.36091 0.39513 0.51824-0.35321
  -1  17   4    0.90    1.35   0 0.78312-0.84737 0.36241 0.44231 0.51964-0.29958
   0  -5  14    4.68    2.06   0 0.76191-0.75209 0.38153-0.61673 0.53738 0.22833
   0   6  -2 1089.50    9.16   0 0.78063-0.78083 0.36472-0.07941 0.52180-0.63138
   0  10  -2   36.86    2.14   0 0.77428-0.77334 0.37053 0.10260 0.52720-0.63589
   0  17   1    1.54    1.79   0 0.77659-0.77244 0.36843 0.43637 0.52524-0.46841
   1  -7  13    1.09    2.46   0 0.75626-0.67674 0.38643-0.71635 0.54188 0.16998
   1  12  -3   63.09    2.53   0 0.77932-0.70867 0.36593 0.20192 0.52292-0.68477
   1  15  -2    1.59    1.66   0 0.77553-0.70297 0.36940 0.34011 0.52615-0.63227
   1  17  -1   11.64    1.77   0 0.76916-0.69690 0.37514 0.42783 0.53147-0.58239
   2  -2  -2 9999.99   19.01   0 0.78499-0.64587 0.36066-0.45301 0.51801-0.62669
   2   0  -3    7.52    2.25   0 0.77574-0.63731 0.36920-0.36804 0.52597-0.68835
   2  13  -4   48.27    2.84   0 0.77297-0.63209 0.37171 0.24288 0.52830-0.74341
   3  -9   5   14.55    1.89   0 0.77520-0.56062 0.36969-0.79419 0.52642-0.25195
   3  -8   3   93.06    2.43   0 0.76772-0.55495 0.37642-0.75330 0.53265-0.36740
   3  -6   0  530.42    4.01   0 0.78151-0.57088 0.36390-0.64565 0.52104-0.51974
   3  -5  -1    1.97    1.22   0 0.78258-0.57254 0.36291-0.59874 0.52011-0.57211
   3  16  -4   -0.08    2.09   0 0.77610-0.56258 0.36887 0.38622 0.52566-0.73686
   4 -10   5   31.81    2.03   0 0.77728-0.49205 0.36780-0.83906 0.52466-0.24822
   4  -8   1    0.61    1.20   0 0.78312-0.50080 0.36241-0.73970 0.51964-0.46166
   4  -7   0  116.72    2.25   0 0.77157-0.49045 0.37297-0.70231 0.52946-0.52725
   4  -5  -2  145.48    2.45   0 0.77384-0.49400 0.37093-0.60543 0.52757-0.63438
   4  -4  -3   12.37    1.29   0 0.78792-0.50881 0.35790-0.54505 0.51544-0.67652
   4  -2  -4  125.63    2.48   0 0.77243-0.49346 0.37220-0.46488 0.52875-0.74442
   4   0  -5    1.57    1.79   0 0.77687-0.49762 0.36818-0.36757 0.52501-0.79449
   4   3  -6    2.60    1.79   0 0.78270-0.50353 0.36280-0.22003 0.52001-0.84365
   5 -11   6   -0.20    1.69   0 0.77173-0.41530 0.37283-0.89150 0.52933-0.19717
   5 -10   3    9.21    1.78   0 0.77881-0.42443 0.36639-0.83790 0.52335-0.35537
   5  -9   1   40.57    1.57   0 0.78792-0.43544 0.35790-0.78185 0.51544-0.45728
   5  -8   0   12.26    1.78   0 0.77464-0.42255 0.37020-0.74699 0.52689-0.52349
   5  -5  -3  390.17    3.39   0 0.77870-0.42891 0.36650-0.60087 0.52345-0.68352
   5  -2  -5   14.36    1.40   0 0.78633-0.43749 0.35941-0.45168 0.51684-0.78580
   5   1  -6  112.24    2.40   0 0.77019-0.42126 0.37421-0.32533 0.53061-0.85392
   5   5  -7    0.76    1.78   0 0.77908-0.42960 0.36614-0.12876 0.52312-0.90040
   5   6  -7    2.16    1.68   0 0.77139-0.42123 0.37314-0.08770 0.52962-0.90901
   5  10  -7    2.13    2.08   0 0.76579-0.41587 0.37813 0.09382 0.53423-0.91005
   6 -12   7   -0.46    1.75   0 0.77989-0.35456 0.36540-0.92784 0.52243-0.13409
   6 -12   8   15.59    2.15   0 0.77371-0.34388 0.37104-0.93721 0.52767-0.08481
   6 -11   4    1.39    1.81   0 0.77322-0.34755 0.37149-0.89068 0.52809-0.30434
   6 -10   2    2.84    1.69   0 0.77036-0.34628 0.37406-0.84549 0.53047-0.41627
   6  -9   0   97.35    1.94   0 0.78553-0.36318 0.36016-0.78397 0.51754-0.51271
   6  -8  -1   27.17    1.90   0 0.77770-0.35587 0.36741-0.74412 0.52430-0.57400
   6  -7  -2   73.35    2.04   0 0.77628-0.35513 0.36871-0.69794 0.52551-0.63013
   6  -6  -3   82.09    1.77   0 0.78097-0.36066 0.36440-0.64612 0.52150-0.68061
   6  -5  -4   21.40    1.34   0 0.79215-0.37241 0.35388-0.58862 0.51167-0.72536
   6  -3  -5    4.51    1.72   0 0.77935-0.36014 0.36589-0.50670 0.52289-0.79047
   6  -1  -6    2.85    1.69   0 0.78097-0.36154 0.36440-0.41067 0.52150-0.84378
   6   2  -7   60.19    2.31   0 0.77977-0.36073 0.36551-0.26954 0.52253-0.89900
   6  13  -7   -0.17    2.45   0 0.74791-0.32596 0.39352 0.22202 0.54838-0.92269
   7 -12   5   14.10    1.93   0 0.78016-0.28194 0.36515-0.93114 0.52220-0.24201
   7 -10   1    2.06    1.79   0 0.77391-0.27943 0.37086-0.84328 0.52751-0.46708
   7  -8  -2   16.32    1.32   0 0.78845-0.29685 0.35740-0.73393 0.51497-0.61822
   7  -7  -3   14.61    1.35   0 0.79004-0.29916 0.35589-0.68493 0.51356-0.67137
   7  -4  -5   -1.63    1.16   0 0.78151-0.29126 0.36390-0.55425 0.52104-0.78591
   7  -2  -6   32.97    1.95   0 0.77764-0.28771 0.36747-0.46010 0.52436-0.84567
   7   0  -7    0.37    1.37   0 0.78819-0.29831 0.35765-0.35932 0.51520-0.88974
   7   4  -8    3.57    1.40   0 0.78898-0.29936 0.35690-0.16690 0.51450-0.94421
   7   5  -8   -0.41    1.86   0 0.77610-0.28628 0.36887-0.13125 0.52566-0.95357
   7   6  -8    6.84    1.98   0 0.77174-0.28152 0.37282-0.08802 0.52932-0.95975
   7   9  -8    1.98    2.01   0 0.76246-0.27206 0.38105 0.04534 0.53693-0.96485
   7  10  -8    0.05    1.85   0 0.77488-0.28270 0.36999 0.10242 0.52669-0.95732
   8 -12   4    4.95    1.95   0 0.77711-0.21048 0.36795-0.93342 0.52480-0.29838
   8 -11   2   -0.06    1.86   0 0.77420-0.20960 0.37061-0.89118 0.52727-0.40919
   8 -10   0   12.00    1.47   0 0.78232-0.21819 0.36316-0.83431 0.52034-0.51268
   8  -9  -1    4.61    1.84   0 0.77392-0.20978 0.37085-0.79493 0.52750-0.57520
   8  -7  -3    2.28    1.58   0 0.77436-0.21013 0.37045-0.70226 0.52713-0.68560
   8  -6  -4   30.14    1.98   0 0.77844-0.21732 0.36674-0.64862 0.52368-0.73471
   8  -5  -5   13.03    1.34   0 0.79030-0.22991 0.35564-0.59022 0.51332-0.77906
   8  -3  -6   10.77    1.33   0 0.78312-0.22302 0.36241-0.50276 0.51964-0.83994
   8  -1  -7    3.15    1.32   0 0.78739-0.22676 0.35841-0.40410 0.51591-0.89064
   8   2  -8    0.50    1.38   0 0.79109-0.23050 0.35489-0.26182 0.51262-0.94124
   8   3  -8    3.27    1.82   0 0.77684-0.21629 0.36820-0.22471 0.52503-0.95383
   9 -11   1    4.25    1.38   0 0.78339-0.14783 0.36216-0.87997 0.51941-0.45665
   9 -10   0    1.08    1.76   0 0.77183-0.13597 0.37275-0.84512 0.52925-0.52168
   9  -9  -2   17.15    1.41   0 0.79188-0.15808 0.35413-0.77787 0.51191-0.61299
   9  -8  -3   12.19    1.40   0 0.79136-0.15879 0.35464-0.73128 0.51238-0.66790
   9  -5  -5   11.46    1.87   0 0.77800-0.14582 0.36714-0.60188 0.52405-0.78897
   9  -1  -7    3.03    1.95   0 0.77447-0.14308 0.37036-0.41601 0.52704-0.90119
   9   1  -8    0.16    1.44   0 0.79057-0.15940 0.35539-0.30942 0.51309-0.94056
   9   2  -8    8.11    1.95   0 0.77621-0.14469 0.36878-0.27241 0.52557-0.95399
  10 -10  -1   14.96    1.63   0 0.78951-0.08505 0.35640-0.82716 0.51403-0.55902
  10  -9  -2    7.64    1.37   0 0.78446-0.08054 0.36116-0.78475 0.51848-0.61781
  10  -8  -3   -0.81    1.36   0 0.78392-0.08086 0.36166-0.73970 0.51894-0.67116
  10  -7  -4   12.73    1.49   0 0.78765-0.08479 0.35815-0.68725 0.51567-0.72446
  10  -5  -5    4.82    1.73   0 0.77146-0.06823 0.37307-0.60777 0.52956-0.79364
  10  -4  -6   14.59    1.48   0 0.78606-0.08503 0.35966-0.54723 0.51708-0.83523
  10  -2  -7   -0.11    1.38   0 0.78579-0.08395 0.35991-0.45546 0.51731-0.88859
  10   1  -8   -1.52    1.78   0 0.77908-0.07913 0.36614-0.31941 0.52312-0.94617
  -3   2   9    4.48    1.70   0 0.75295-0.95609 0.38904-0.29411 0.54473-0.05607
  -3   2  10  134.63    2.48   0 0.75351-0.95721 0.38857-0.29310 0.54430-0.00078
  -3   2  11    8.94    1.82   0 0.75307-0.95470 0.38894-0.29389 0.54464 0.05279
  -3   3   7   17.44    1.52   0 0.75305-0.95853 0.38896-0.24557 0.54466-0.16559
  -3   3   8   54.42    1.58   0 0.76205-0.96805 0.38120-0.23840 0.53752-0.10372
  -3   3   9   11.19    1.30   0 0.76761-0.97269 0.37630-0.23418 0.53300-0.04499
  -3   3  10    0.09    1.23   0 0.76899-0.97327 0.37507-0.23230 0.53186 0.01142
  -3   3  11    1.24    1.35   0 0.76622-0.96967 0.37753-0.23522 0.53413 0.06496
  -3   3  12   12.09    1.37   0 0.76037-0.96309 0.38266-0.24018 0.53887 0.11477
  -3   3  13   -0.50    1.82   0 0.75275-0.95432 0.38921-0.24537 0.54489 0.16181
  -3   4   6   12.59    1.57   0 0.75310-0.95884 0.38891-0.19934 0.54461-0.22035
  -3   4   7   89.63    1.81   0 0.76650-0.97301 0.37728-0.18721 0.53390-0.15483
  -3   4  13    8.25    1.36   0 0.76289-0.96472 0.38046-0.19072 0.53684 0.17130
  -3   4  14   -0.34    1.78   0 0.75361-0.95303 0.38849-0.19842 0.54422 0.21802
  -3   5   6   27.74    1.35   0 0.76372-0.97052 0.37973-0.14236 0.53617-0.21169
  -3   5  14    1.95    1.33   0 0.76009-0.96077 0.38290-0.14557 0.53909 0.22431
  -3   6   5   24.87    1.77   0 0.75355-0.96035 0.38853-0.10414 0.54426-0.27425
  -3   6  14   -0.41    1.34   0 0.76511-0.96640 0.37851-0.09277 0.53504 0.22710
  -3   7   5   29.13    1.70   0 0.75767-0.96520 0.38500-0.05315 0.54102-0.27086
  -3   8   5  153.98    2.07   0 0.76037-0.96704 0.38266-0.00368 0.53887-0.26856
  -3   9   5    2.04    1.11   0 0.75925-0.96598 0.38363 0.04205 0.53976-0.26827
  -3  10   5   16.70    1.67   0 0.75531-0.96182 0.38703 0.08565 0.54289-0.27222
  -3  10   6   17.40    1.25   0 0.77036-0.97600 0.37384 0.09929 0.53072-0.20550
  -3  11   5    0.82    1.41   0 0.74962-0.95584 0.39187 0.12875 0.54732-0.27566
  -3  11   6   30.32    1.36   0 0.76400-0.96972 0.37949 0.14077 0.53594-0.21028
  -3  12   6    6.63    1.64   0 0.75615-0.96153 0.38631 0.18101 0.54222-0.21645
  -3  12   7    3.31    1.21   0 0.76622-0.97097 0.37753 0.18992 0.53413-0.15351
  -3  13   7    7.41    1.67   0 0.75604-0.96115 0.38641 0.22875 0.54231-0.16164
  -3  13   8    5.40    1.24   0 0.76289-0.96717 0.38046 0.23448 0.53684-0.10099
  -3  13   9    2.86    1.28   0 0.76678-0.96969 0.37704 0.23847 0.53368-0.04286
  -3  13  10   -0.22    1.36   0 0.76733-0.96963 0.37655 0.23934 0.53322 0.01015
  -3  14   8    2.27    1.75   0 0.75305-0.95594 0.38896 0.27360 0.54466-0.10859
  -3  14   9   -1.31    1.75   0 0.75488-0.95889 0.38740 0.27674 0.54322-0.05428
  -2  -1   7   55.91    2.16   0 0.75350-0.88971 0.38858-0.43458 0.54430-0.16476
  -2  -1  12    0.74    1.21   0 0.76372-0.89655 0.37973-0.42650 0.53617 0.11835
  -2  -1  13    2.68    1.78   0 0.75332-0.88453 0.38873-0.43496 0.54444 0.16412
  -2   0  14    8.48    1.46   0 0.76428-0.89477 0.37924-0.37913 0.53571 0.22808
  -2   0  15   -1.91    1.54   0 0.75019-0.87934 0.39138-0.38786 0.54688 0.26783
  -2   1  15   -0.39    1.34   0 0.76733-0.89832 0.37655-0.32656 0.53322 0.28435
  -2   3   3   52.26    1.84   0 0.76456-0.90323 0.37900-0.23598 0.53549-0.37444
  -2   5   2  317.73    3.46   0 0.75550-0.89448 0.38687-0.14924 0.54273-0.43596
  -2   6   2   16.52    1.37   0 0.76816-0.90669 0.37581-0.09125 0.53254-0.42586
  -2  10   2   -0.81    1.14   0 0.76705-0.90506 0.37679 0.09537 0.53345-0.42635
  -2  11   2   12.05    1.67   0 0.75876-0.89679 0.38406 0.13731 0.54015-0.43193
  -2  12   2  133.17    2.48   0 0.74917-0.88637 0.39225 0.17541 0.54767-0.43925
  -2  13   3    3.59    1.30   0 0.76484-0.90173 0.37875 0.23668 0.53526-0.37168
  -2  14   3   78.50    2.21   0 0.75182-0.88737 0.39001 0.27187 0.54562-0.38177
  -2  15   4    9.28    1.96   0 0.75644-0.89213 0.38606 0.32419 0.54200-0.32283
  -2  16   5    1.71    1.87   0 0.75430-0.89030 0.38790 0.37114 0.54368-0.27049
  -2  16   6   12.79    1.46   0 0.76816-0.90262 0.37581 0.38153 0.53254-0.20397
  -1  -4   9  209.34    3.76   0 0.75379-0.81877 0.38833-0.57613 0.54407-0.05361
  -1  -4  10   60.82    2.33   0 0.75637-0.82113 0.38612-0.57395 0.54205 0.00341
  -1  -4  11   -0.18    1.70   0 0.75247-0.81560 0.38945-0.57798 0.54511 0.05538
  -1  -4  12   17.87    2.05   0 0.74225-0.80460 0.39802-0.58592 0.55294 0.10226
  -1  -3  14   -0.64    1.71   0 0.75615-0.81924 0.38631-0.52617 0.54222 0.22280
  -1  -1   3  190.27    4.32   0 0.75635-0.82525 0.38614-0.43192 0.54207-0.38079
  -1   4   0  259.71    4.06   0 0.75295-0.82276 0.38904-0.19854 0.54473-0.54612
  -1  12   0   38.94    1.84   0 0.76009-0.82840 0.38290 0.18493 0.53909-0.53897
  -1  15   1    8.49    1.77   0 0.74900-0.81604 0.39239 0.31663 0.54780-0.49230
  -1  16   2    0.37    1.56   0 0.75981-0.82613 0.38315 0.37441 0.53931-0.42901
  -1  17   3   -2.04    1.38   0 0.76317-0.82771 0.38022 0.42429 0.53662-0.37414
   0  -6   9   46.06    3.34   0 0.73432-0.72793 0.40449-0.68650 0.55883-0.06697
   0  -6  10  147.86    4.48   0 0.74541-0.73842 0.39540-0.67739 0.55055-0.00382
   0  -6  11   28.82    2.62   0 0.73767-0.73042 0.40177-0.68364 0.55636 0.04537
   0   5  -2  385.28    6.74   0 0.73867-0.73918 0.40095-0.16283 0.55561-0.66525
   0  11  -2   25.50    1.92   0 0.75679-0.75607 0.38576 0.13501 0.54172-0.65027
   0  14  -1   51.43    1.81   0 0.76595-0.76439 0.37777 0.28423 0.53436-0.58746
   0  16   0    0.75    1.27   0 0.76456-0.76164 0.37900 0.37869 0.53549-0.53360
   0  18   1   14.45    1.98   0 0.75093-0.74609 0.39076 0.45985 0.54631-0.48821
   1  -1  -1  966.52    8.73   0 0.75350-0.68404 0.38858-0.43359 0.54431-0.59947
   1  13  -3   91.04    3.06   0 0.74819-0.67736 0.39307 0.22144 0.54842-0.70983
   2  -8   6   31.67    2.49   0 0.74198-0.59656 0.39824-0.77575 0.55314-0.22524
   2  -6   2   41.69    2.33   0 0.75473-0.61313 0.38753-0.66936 0.54334-0.43391
   2  -3  -1  122.79    3.12   0 0.75309-0.61352 0.38893-0.52865 0.54462-0.59889
   2   3  -4  398.02    5.43   0 0.75763-0.61881 0.38503-0.24121 0.54105-0.75781
   2  16  -3    0.61    1.86   0 0.75756-0.61528 0.38509 0.37275 0.54110-0.70118
   3  -2  -3   58.93    1.88   0 0.76788-0.55884 0.37606-0.46836 0.53277-0.69498
   3   0  -4    1.35    1.41   0 0.76595-0.55665 0.37777-0.37729 0.53436-0.75011
   3   3  -5    9.44    1.53   0 0.76289-0.55436 0.38046-0.23709 0.53684-0.80692
   4 -10   6  101.67    2.63   0 0.75050-0.46390 0.39112-0.86321 0.54664-0.21601
   4  -9   3   14.39    1.34   0 0.76761-0.48428 0.37630-0.80031 0.53300-0.36682
   4  -6  -1  319.99    2.92   0 0.76761-0.48694 0.37630-0.65799 0.53300-0.58515
   4   4  -6    6.19    1.98   0 0.75953-0.48056 0.38339-0.19265 0.53954-0.86326
   5 -11   7   13.15    1.82   0 0.75299-0.39504 0.38901-0.90795 0.54470-0.15792
   5 -10   4   82.26    2.31   0 0.74919-0.39397 0.39223-0.86402 0.54765-0.32553
   5  -9   2  106.43    2.46   0 0.75155-0.39814 0.39024-0.81435 0.54583-0.43299
   5  -7  -1   24.74    1.41   0 0.76871-0.41786 0.37532-0.70467 0.53209-0.58312
   5  -6  -2  139.35    2.07   0 0.76981-0.41932 0.37433-0.65599 0.53118-0.63685
   5  -3  -4   14.60    1.68   0 0.75791-0.40792 0.38479-0.52439 0.54083-0.75558
   5  -1  -5   42.73    1.89   0 0.75412-0.40470 0.38805-0.43363 0.54382-0.81273
   5   7  -7   12.03    2.06   0 0.75878-0.40903 0.38404-0.05235 0.54013-0.91703
   5   8  -7   -0.12    1.90   0 0.75431-0.40360 0.38788-0.01101 0.54367-0.92063
   5   9  -7    3.20    1.84   0 0.75802-0.40753 0.38470 0.04122 0.54074-0.91787
   6 -11   5    8.70    1.91   0 0.74917-0.32186 0.39225-0.91116 0.54767-0.26864
   6  -9   1   32.99    2.00   0 0.75104-0.32778 0.39066-0.81480 0.54622-0.48701
   6  -4  -4  154.10    2.47   0 0.75747-0.33744 0.38517-0.57227 0.54118-0.75457
   6   0  -6   17.23    1.90   0 0.75438-0.33447 0.38782-0.38652 0.54361-0.86572
   6   3  -7   52.11    2.17   0 0.76093-0.34151 0.38217-0.23899 0.53842-0.91472
   7 -12   6    7.34    1.41   0 0.76400-0.26614 0.37949-0.94512 0.53594-0.20092
   7 -12   7    0.60    1.91   0 0.75089-0.25206 0.39079-0.95680 0.54633-0.15746
   7 -11   3   -1.26    1.11   0 0.76761-0.27339 0.37630-0.89510 0.53300-0.36099
   7  -9   0   41.58    1.93   0 0.75897-0.26551 0.38388-0.80760 0.53999-0.53385
   7  -8  -1   70.61    2.04   0 0.75219-0.25948 0.38969-0.76648 0.54532-0.59432
   7  -7  -2   55.75    2.06   0 0.75066-0.25875 0.39099-0.72022 0.54651-0.65016
   7  -6  -3  114.70    2.28   0 0.75467-0.26316 0.38757-0.66934 0.54339-0.70106
   7  -5  -4    0.33    1.15   0 0.76539-0.27463 0.37826-0.61559 0.53481-0.74488
   7  -3  -5    6.98    1.73   0 0.75229-0.26159 0.38960-0.53023 0.54525-0.81208
   7  -1  -6   33.49    2.08   0 0.75279-0.26302 0.38918-0.43507 0.54486-0.86635
   7   1  -7    9.60    1.53   0 0.76816-0.27852 0.37581-0.32741 0.53254-0.90797
   7   2  -7    1.24    1.82   0 0.75026-0.25875 0.39132-0.29541 0.54682-0.92430
   7   7  -8    1.42    1.38   0 0.76539-0.27471 0.37826-0.04550 0.53481-0.96446
   7   8  -8    1.24    1.68   0 0.76260-0.27186 0.38071-0.00075 0.53707-0.96615
   8 -12   5    1.23    1.73   0 0.75643-0.18969 0.38607-0.94838 0.54200-0.26189
   8 -11   3   12.45    1.69   0 0.74885-0.18210 0.39251-0.91105 0.54791-0.37639
   8 -10   1   46.31    2.11   0 0.75424-0.18938 0.38795-0.85911 0.54373-0.48149
   8  -8  -2   21.70    1.43   0 0.77009-0.20741 0.37409-0.75055 0.53095-0.63305
   8  -4  -5   -0.71    1.19   0 0.76261-0.20153 0.38071-0.57075 0.53707-0.80070
   8  -2  -6    1.11    1.63   0 0.75739-0.19678 0.38524-0.47775 0.54124-0.86044
   8   0  -7    1.37    1.35   0 0.76733-0.20642 0.37655-0.37485 0.53322-0.90789
   8   1  -7    1.90    1.78   0 0.74762-0.18636 0.39355-0.34472 0.54886-0.92367
   8   4  -8    2.76    1.36   0 0.76456-0.20370 0.37900-0.18799 0.53549-0.96424
   8   5  -8    0.16    1.89   0 0.75417-0.19302 0.38800-0.14964 0.54378-0.97286
   8   6  -8    1.26    1.80   0 0.74532-0.18385 0.39547-0.10991 0.55061-0.97967
   9 -11   2    6.56    1.41   0 0.76009-0.12420 0.38290-0.90062 0.53909-0.42135
   9  -9  -1   23.10    1.50   0 0.76205-0.12771 0.38120-0.80512 0.53752-0.58352
   9  -8  -2    0.83    1.55   0 0.75544-0.12352 0.38692-0.76010 0.54279-0.64198
   9  -7  -3    0.41    1.34   0 0.76009-0.12754 0.38290-0.71400 0.53909-0.69234
   9  -6  -4    5.70    1.36   0 0.76678-0.13430 0.37704-0.65897 0.53368-0.74390
   9  -4  -5    3.21    1.70   0 0.75228-0.11932 0.38961-0.57754 0.54525-0.81087
   9  -3  -6    1.71    1.32   0 0.77009-0.13827 0.37409-0.51392 0.53095-0.85002
   9   0  -7    0.15    1.84   0 0.75446-0.12277 0.38776-0.38575 0.54356-0.91715
   9   3  -8    0.18    1.33   0 0.76261-0.13082 0.38071-0.23981 0.53707-0.96442
   9   4  -8    5.60    1.94   0 0.75019-0.11829 0.39138-0.20106 0.54688-0.97456
  10 -10   0    0.90    1.50   0 0.76372-0.05789 0.37973-0.84990 0.53617-0.52681
  10  -9  -1   -0.38    1.87   0 0.75488-0.05101 0.38740-0.81102 0.54322-0.58556
  10  -8  -2   29.58    2.02   0 0.75337-0.04902 0.38869-0.76568 0.54441-0.64394
  10  -7  -3   -1.79    1.83   0 0.75403-0.05073 0.38812-0.71878 0.54389-0.69586
  10  -6  -4   -0.52    1.30   0 0.76037-0.05745 0.38266-0.66654 0.53887-0.74570
  10  -3  -6   -1.12    1.36   0 0.76372-0.06134 0.37973-0.52236 0.53617-0.85263
  10  -1  -7    2.20    1.45   0 0.76705-0.06472 0.37679-0.42187 0.53345-0.90625
  10   0  -7   -0.79    1.68   0 0.75119-0.04662 0.39054-0.39217 0.54610-0.92024
  10   2  -8    0.85    1.45   0 0.76816-0.06607 0.37581-0.27890 0.53254-0.95960
  10   3  -8   -0.16    1.98   0 0.75446-0.05203 0.38776-0.24657 0.54356-0.96898
  11  -6  -4   -1.84    1.49   0 0.75897 0.01474 0.38388-0.66743 0.53999-0.74566
  11  -3  -6    0.74    1.41   0 0.76205 0.01115 0.38120-0.52352 0.53752-0.85283
  -4   8  10    1.91    1.50   0 0.72587-0.99959 0.41095-0.03201 0.56526-0.02143
  -4   8  11   -1.58    1.49   0 0.72780-0.99857 0.40943-0.03109 0.56388 0.03114
  -4   9  10    2.67    1.52   0 0.72852-0.99978 0.40886 0.01607 0.56337-0.02114
  -4   9  11    0.75    1.55   0 0.72587-0.99864 0.41095 0.01549 0.56526 0.03342
  -3   1   9   21.22    1.77   0 0.72829-0.93212 0.40904-0.36089 0.56353-0.07487
  -3   1  10    0.78    1.76   0 0.73031-0.93449 0.40743-0.35977 0.56207-0.01829
  -3   1  11   36.75    2.09   0 0.73023-0.93320 0.40749-0.35958 0.56213 0.03608
  -3   1  12   36.35    1.86   0 0.72601-0.92768 0.41085-0.36285 0.56517 0.08785
  -3   2   7    0.43    1.60   0 0.73031-0.93611 0.40743-0.31278 0.56207-0.18256
  -3   2   8   -0.13    1.22   0 0.74287-0.94876 0.39722-0.30218 0.55280-0.11887
  -3   2  12    2.31    1.29   0 0.74518-0.94790 0.39530-0.30014 0.55106 0.10243
  -3   2  13   13.31    1.64   0 0.73648-0.93829 0.40246-0.30772 0.55757 0.15052
  -3   2  14    3.23    1.73   0 0.72776-0.92690 0.40946-0.31389 0.56391 0.19701
  -3   3   6  202.52    2.63   0 0.73314-0.94026 0.40516-0.26237 0.56002-0.23598
  -3   3  14    3.21    1.33   0 0.74026-0.94148 0.39937-0.25666 0.55476 0.20843
  -3   4   5  460.24    3.60   0 0.72936-0.93626 0.40819-0.21777 0.56276-0.29295
  -3   5   5    1.42    1.11   0 0.74316-0.95080 0.39698-0.16050 0.55259-0.28172
  -3   6   4  489.88    3.61   0 0.72658-0.93409 0.41039-0.12586 0.56476-0.34961
  -3   7   4   73.88    1.98   0 0.73344-0.94127 0.40492-0.07316 0.55980-0.34455
  -3   8   4    7.72    1.13   0 0.73706-0.94464 0.40198-0.02281 0.55714-0.34162
  -3   9   4   25.67    1.40   0 0.73677-0.94431 0.40222 0.02402 0.55736-0.34182
  -3  10   4  102.11    2.21   0 0.73425-0.94138 0.40426 0.06924 0.55921-0.34315
  -3  11   4    3.07    1.60   0 0.72974-0.93612 0.40788 0.11214 0.56249-0.34569
  -3  12   5   54.28    1.58   0 0.74142-0.94750 0.39841 0.16916 0.55389-0.28264
  -3  13   5    5.98    1.75   0 0.73090-0.93737 0.40696 0.20771 0.56165-0.29028
  -3  13   6    1.79    1.16   0 0.74604-0.95143 0.39458 0.22096 0.55040-0.22399
  -3  14   6   30.93    1.88   0 0.73443-0.93999 0.40412 0.25743 0.55908-0.23291
  -3  14   7    8.74    1.31   0 0.74518-0.94981 0.39530 0.26672 0.55106-0.17055
  -3  15   7   -2.00    1.91   0 0.73149-0.93614 0.40648 0.30458 0.56122-0.18226
  -2  -2   9    1.65    1.65   0 0.73031-0.86518 0.40743-0.50154 0.56208-0.07249
  -2  -2  10    1.72    1.68   0 0.73380-0.86852 0.40462-0.49918 0.55954-0.01431
  -2  -2  11    8.93    1.70   0 0.73306-0.86699 0.40522-0.49902 0.56008 0.03915
  -2  -2  12   28.51    1.98   0 0.72959-0.86070 0.40800-0.50167 0.56259 0.09123
  -2  -1  14    2.15    1.63   0 0.73706-0.86806 0.40198-0.44841 0.55714 0.20658
  -2   0   5    0.62    1.34   0 0.73968-0.87752 0.39984-0.39990 0.55519-0.28372
  -2   1   4  105.42    2.29   0 0.74229-0.88061 0.39770-0.34918 0.55324-0.33789
  -2   2   3   35.22    2.34   0 0.73022-0.86867 0.40750-0.31183 0.56214-0.40124
  -2   4   2   22.20    2.09   0 0.73413-0.87315 0.40436-0.21421 0.55930-0.45291
  -2   8   1  102.43    2.34   0 0.72810-0.86680 0.40919-0.03001 0.56367-0.51084
  -2   9   1  107.32    2.32   0 0.72893-0.86730 0.40853 0.01776 0.56307-0.51013
  -2  10   1  247.22    2.96   0 0.72488-0.86344 0.41174 0.06173 0.56597-0.51289
  -2  13   2   -0.29    1.87   0 0.73031-0.87098 0.40743 0.21099 0.56207-0.45451
  -2  15   3   23.12    1.86   0 0.73349-0.87065 0.40488 0.30401 0.55977-0.39623
  -2  16   4    8.50    1.39   0 0.73881-0.87498 0.40056 0.35520 0.55584-0.33742
  -1  -4   8   99.50    2.88   0 0.73486-0.80105 0.40377-0.59162 0.55876-0.12319
  -1  -4  13    1.26    1.61   0 0.72913-0.78960 0.40837-0.59590 0.56293 0.14604
  -1  -3  15    2.02    1.87   0 0.73560-0.79540 0.40317-0.54415 0.55822 0.26052
  -1  -2   4   16.46    1.77   0 0.74200-0.81040 0.39794-0.49109 0.55346-0.33748
  -1   0   2    0.73    2.02   0 0.73852-0.80801 0.40080-0.40090 0.55606-0.44749
  -1  13   0   34.70    1.56   0 0.74316-0.81149 0.39698 0.21779 0.55259-0.55252
  -1  14   0   29.20    1.93   0 0.72434-0.79255 0.41217 0.24999 0.56635-0.56599
  -1  16   1    4.29    1.81   0 0.72754-0.79375 0.40963 0.34701 0.56407-0.50838
  -1  17   2    7.69    1.71   0 0.73706-0.80339 0.40198 0.40357 0.55714-0.44591
   0  -6  12    1.98    2.14   0 0.72367-0.71474 0.41269-0.69499 0.56682 0.08890
   0  12  -2   24.22    1.89   0 0.73759-0.73694 0.40155 0.16610 0.55675-0.66503
   0  15  -1    4.99    1.56   0 0.73968-0.73825 0.39984 0.30922 0.55519-0.60823
   0  17   0   -0.39    1.86   0 0.73326-0.72983 0.40507 0.40091 0.55994-0.56160
   1  -7  14    0.40    2.58   0 0.70462-0.62383 0.42727-0.75847 0.57990 0.18776
   1   1  -2 4623.94   20.93   0 0.73031-0.66125 0.40743-0.35812 0.56207-0.67106
   1  16  -2    0.71    1.80   0 0.73794-0.66561 0.40127 0.35663 0.55649-0.66323
   2  -7   4   88.09    2.76   0 0.72159-0.57807 0.41432-0.74428 0.56829-0.34963
   2  -5   1   44.77    2.32   0 0.73679-0.59595 0.40220-0.63679 0.55734-0.50238
   2  -4   0  181.34    3.29   0 0.73601-0.59575 0.40284-0.58990 0.55792-0.55759
   2  14  -4    5.12    2.20   0 0.71885-0.57851 0.41645 0.24599 0.57021-0.78500
   3  -9   6   85.25    2.60   0 0.73475-0.51863 0.40386-0.82834 0.55884-0.22918
   3  -7   2  140.79    2.74   0 0.73537-0.52322 0.40336-0.73278 0.55839-0.44773
   3  -3  -2    1.78    1.37   0 0.73648-0.52646 0.40246-0.54279 0.55757-0.66493
   3   4  -5  463.16    5.25   0 0.72646-0.51789 0.41049-0.21970 0.56484-0.83534
   4 -10   7    7.00    1.77   0 0.72349-0.43546 0.41283-0.88520 0.56695-0.18111
   4  -9   4   71.02    2.26   0 0.72877-0.44404 0.40866-0.83323 0.56319-0.34215
   4  -8   2  170.43    2.46   0 0.73794-0.45509 0.40127-0.77805 0.55649-0.44454
   4  -3  -3   32.59    1.48   0 0.74229-0.46278 0.39770-0.53734 0.55324-0.71429
   4  -1  -4  892.71    5.22   0 0.73012-0.45114 0.40758-0.45280 0.56221-0.77761
   4   1  -5   15.15    1.46   0 0.74142-0.46237 0.39841-0.34942 0.55389-0.82318
   4   5  -6  282.57    4.10   0 0.73534-0.45621 0.40339-0.16552 0.55841-0.88169
   5 -11   8   29.36    2.21   0 0.73675-0.37719 0.40224-0.92139 0.55737-0.11501
   5 -11   9   15.41    2.01   0 0.72562-0.36499 0.41116-0.93045 0.56544-0.06879
   5 -11  10    6.78    2.27   0 0.71974-0.35883 0.41576-0.93478 0.56959-0.01918
   5  -8   1  114.30    2.40   0 0.73119-0.37840 0.40673-0.78321 0.56144-0.50284
   5  -4  -3   56.55    1.58   0 0.73648-0.38621 0.40246-0.58952 0.55757-0.71752
   5   2  -6  242.28    2.93   0 0.74316-0.39410 0.39698-0.30077 0.55259-0.87535
   6 -11   6   -0.56    1.82   0 0.72736-0.29964 0.40978-0.92851 0.56420-0.23053
   6 -10   3   49.10    1.65   0 0.73968-0.31445 0.39984-0.87131 0.55519-0.38597
   6  -8   0    5.68    1.35   0 0.73794-0.31483 0.40127-0.77799 0.55649-0.55161
   6  -7  -1  109.50    2.29   0 0.73197-0.30998 0.40610-0.73518 0.56087-0.61031
   6  -6  -2    2.57    1.64   0 0.73335-0.31125 0.40499-0.68741 0.55987-0.66337
   6  -5  -3   -0.39    1.23   0 0.74200-0.32124 0.39794-0.63516 0.55346-0.70948
   6  -2  -5   44.63    1.64   0 0.74776-0.32793 0.39314-0.48580 0.54908-0.81672
   6   1  -6    1.19    1.90   0 0.72795-0.30758 0.40931-0.36091 0.56378-0.88609
   6   4  -7   -0.55    1.35   0 0.74316-0.32265 0.39698-0.20943 0.55259-0.92844
   6   5  -7   42.93    2.19   0 0.72669-0.30739 0.41031-0.17300 0.56468-0.94075
   6  12  -7    0.36    2.39   0 0.70926-0.28811 0.42379 0.14459 0.57679-0.95034
   7 -11   4   17.13    1.48   0 0.74374-0.24679 0.39650-0.91517 0.55215-0.32689
   7 -10   2   13.90    1.36   0 0.74316-0.24792 0.39698-0.86842 0.55259-0.43669
   7  -9   1   64.40    2.04   0 0.72506-0.23056 0.41160-0.83566 0.56584-0.50503
   7  -4  -4    0.23    1.69   0 0.73149-0.23964 0.40648-0.59433 0.56122-0.77304
   7   0  -6    0.69    1.91   0 0.73031-0.23802 0.40743-0.40712 0.56207-0.88647
   7   3  -7   11.73    1.98   0 0.72955-0.24007 0.40804-0.26537 0.56263-0.93802
   8 -11   4    0.65    1.90   0 0.72558-0.15785 0.41119-0.92951 0.56547-0.33914
   8 -10   2    2.18    1.92   0 0.72617-0.15979 0.41072-0.88222 0.56505-0.44816
   8  -9   0    9.94    1.32   0 0.74142-0.17653 0.39841-0.82243 0.55389-0.54599
   8  -8  -1    0.34    1.62   0 0.73031-0.16890 0.40743-0.78005 0.56207-0.60729
   8  -7  -2    1.44    1.63   0 0.73123-0.16830 0.40670-0.73455 0.56141-0.66192
   8  -6  -3   27.88    1.45   0 0.73735-0.17450 0.40175-0.68390 0.55692-0.71289
   8  -5  -4   50.69    1.65   0 0.74776-0.18636 0.39314-0.62782 0.54908-0.76022
   8  -3  -5    3.74    1.70   0 0.73414-0.17292 0.40436-0.54464 0.55929-0.82462
   8  -1  -6   -0.59    1.74   0 0.73326-0.17161 0.40507-0.45071 0.55994-0.87968
   8   2  -7    6.28    1.94   0 0.72883-0.16783 0.40861-0.31269 0.56315-0.93812
   8   7  -8    0.39    1.83   0 0.73031-0.17156 0.40743-0.07603 0.56207-0.98487
   8   8  -8    3.70    2.18   0 0.73502-0.17269 0.40365-0.02423 0.55865-0.98720
   8   9  -8    5.44    2.21   0 0.73472-0.17187 0.40388 0.02196 0.55886-0.98726
   9 -11   3    2.26    1.39   0 0.73794-0.10028 0.40127-0.91960 0.55649-0.38399
   9 -10   1    1.56    1.38   0 0.74316-0.10698 0.39698-0.86775 0.55259-0.48930
   9  -9   0   14.49    1.97   0 0.73135-0.09584 0.40660-0.83060 0.56132-0.55207
   9  -8  -1    3.24    1.58   0 0.72671-0.09040 0.41029-0.78856 0.56466-0.61151
   9  -6  -3    0.03    1.67   0 0.72913-0.09546 0.40837-0.69370 0.56293-0.71693
   9  -5  -4    6.49    1.36   0 0.73706-0.10414 0.40198-0.63692 0.55714-0.76688
   9  -2  -6   12.83    1.39   0 0.74690-0.11581 0.39386-0.48681 0.54974-0.86860
   9   1  -7    5.10    1.84   0 0.73531-0.10390 0.40341-0.35422 0.55843-0.93164
   9   5  -8   -0.74    1.41   0 0.73939-0.10679 0.40008-0.16445 0.55541-0.98245
   9   6  -8    0.20    1.94   0 0.73061-0.09781 0.40719-0.12408 0.56186-0.98907
   9   7  -8    0.74    2.05   0 0.72468-0.09233 0.41189-0.07848 0.56611-0.99407
  10 -10   1   -0.81    1.48   0 0.73852-0.03271 0.40080-0.87264 0.55606-0.48957
  10  -9   0    1.28    1.91   0 0.72952-0.02213 0.40806-0.83356 0.56265-0.55395
  10  -5  -4    6.83    1.86   0 0.73238-0.02813 0.40577-0.64048 0.56058-0.76909
  10  -4  -5    2.41    1.28   0 0.74575-0.04223 0.39482-0.58188 0.55062-0.81393
  10  -2  -6    3.02    1.21   0 0.74142-0.03823 0.39841-0.49093 0.55389-0.87184
  10   1  -7    1.28    1.97   0 0.73078-0.02766 0.40706-0.35766 0.56174-0.93447
  10   4  -8   -2.36    1.52   0 0.74374-0.04049 0.39650-0.20800 0.55215-0.97821
  11  -6  -3    3.19    1.82   0 0.72689 0.05045 0.41015-0.69328 0.56454-0.71917
  11  -5  -4   -0.49    1.93   0 0.73164 0.04209 0.40637-0.64226 0.56111-0.76569
  11  -4  -5    0.56    1.38   0 0.74518 0.02870 0.39530-0.58483 0.55106-0.81114
  11  -2  -6   -0.47    1.45   0 0.74113 0.03269 0.39865-0.49389 0.55411-0.86918
  -4   5   9    2.28    1.60   0 0.70495-0.97952 0.42634-0.18976 0.57952-0.09110
  -4   5  10    2.80    1.57   0 0.70797-0.98280 0.42407-0.18730 0.57750-0.03393
  -4   5  11    4.62    1.76   0 0.70751-0.98231 0.42441-0.18753 0.57781 0.02088
  -4   5  12    8.45    1.82   0 0.70618-0.97869 0.42541-0.18909 0.57870 0.07372
  -4   5  13    5.05    1.65   0 0.70185-0.97226 0.42865-0.19188 0.58158 0.12448
  -4   6   8   -0.21    1.55   0 0.70618-0.98183 0.42541-0.14152 0.57870-0.14472
  -4   6   9   34.63    1.45   0 0.71349-0.98866 0.41988-0.13565 0.57376-0.08610
  -4   6  10    1.46    1.13   0 0.71711-0.99152 0.41709-0.13296 0.57126-0.02771
  -4   6  11    2.85    1.21   0 0.71711-0.99075 0.41709-0.13287 0.57126 0.02702
  -4   6  12   -1.96    1.32   0 0.71379-0.98707 0.41965-0.13463 0.57355 0.07800
  -4   6  13    1.97    1.79   0 0.70646-0.97998 0.42520-0.14074 0.57852 0.13004
  -4   7   7   31.27    1.67   0 0.70186-0.97758 0.42863-0.09777 0.58157-0.20254
  -4   7   8   -0.55    1.13   0 0.71258-0.98816 0.42057-0.08930 0.57438-0.14160
  -4   7   9    3.92    1.14   0 0.71951-0.99455 0.41523-0.08405 0.56959-0.08082
  -4   7  10   -0.21    1.12   0 0.72251-0.99694 0.41290-0.08106 0.56749-0.02529
  -4   7  11    5.41    1.18   0 0.72251-0.99597 0.41290-0.08125 0.56749 0.03058
  -4   7  12   -1.01    1.29   0 0.71921-0.99219 0.41546-0.08313 0.56980 0.08171
  -4   7  13    0.92    1.35   0 0.71318-0.98531 0.42011-0.08829 0.57396 0.13400
  -4   8   7   24.15    1.69   0 0.70585-0.98155 0.42566-0.04706 0.57892-0.20036
  -4   8   8    8.40    1.22   0 0.71590-0.99159 0.41802-0.03953 0.57209-0.13868
  -4   8   9   18.64    1.30   0 0.72281-0.99744 0.41266-0.03417 0.56728-0.07913
  -4   8  12   -0.73    1.22   0 0.72191-0.99474 0.41336-0.03369 0.56791 0.08362
  -4   8  13    0.56    1.34   0 0.71651-0.98831 0.41756-0.03769 0.57168 0.13436
  -4   9   7   16.86    1.65   0 0.70647-0.98257 0.42519 0.00031 0.57850-0.19993
  -4   9   8   12.56    1.27   0 0.71681-0.99224 0.41733 0.00824 0.57147-0.13804
  -4   9   9    4.26    1.21   0 0.72310-0.99780 0.41243 0.01374 0.56707-0.07825
  -4   9  12   -0.25    1.23   0 0.72251-0.99500 0.41290 0.01409 0.56749 0.08398
  -4  10   7    5.26    1.57   0 0.70567-0.98128 0.42580 0.04729 0.57904-0.19976
  -4  10   8   10.43    1.27   0 0.71530-0.99056 0.41849 0.05428 0.57251-0.13835
  -4  10   9    8.29    1.24   0 0.72131-0.99590 0.41383 0.05848 0.56833-0.07998
  -4  10  10    1.37    1.21   0 0.72400-0.99781 0.41173 0.06198 0.56643-0.02247
  -4  10  11    3.80    1.27   0 0.72370-0.99683 0.41196 0.06107 0.56664 0.03188
  -4  11   7    5.63    1.60   0 0.70293-0.97759 0.42784 0.09219 0.58086-0.20131
  -4  11   8    8.89    1.59   0 0.71141-0.98654 0.42146 0.09846 0.57517-0.14174
  -4  11   9    4.79    1.26   0 0.71771-0.99196 0.41663 0.10332 0.57084-0.08172
  -4  11  10   -0.04    1.25   0 0.72041-0.99381 0.41453 0.10666 0.56896-0.02694
  -4  11  11    2.65    1.35   0 0.72011-0.99296 0.41477 0.10642 0.56917 0.02963
  -4  12   8   11.87    1.69   0 0.70611-0.98072 0.42546 0.14161 0.57875-0.14459
  -4  12   9   -0.29    1.55   0 0.70878-0.98577 0.42346 0.14707 0.57695-0.08831
  -4  12  10    6.80    1.47   0 0.71470-0.98813 0.41895 0.14920 0.57292-0.02916
  -4  13   9    3.93    1.84   0 0.70466-0.97828 0.42655 0.18896 0.57972-0.09038
  -3   0  10    1.60    1.66   0 0.70056-0.90441 0.42960-0.42926 0.58242-0.03902
  -3   0  11    1.61    1.64   0 0.70378-0.90565 0.42721-0.42625 0.58030 0.01718
  -3   1   8   36.44    1.50   0 0.71560-0.92187 0.41826-0.37013 0.57230-0.13903
  -3   1  13   -0.39    1.19   0 0.71560-0.91869 0.41826-0.36925 0.57230 0.13504
  -3   1  14    5.14    1.85   0 0.70588-0.90600 0.42564-0.37822 0.57890 0.18291
  -3   2   6  126.17    2.38   0 0.70646-0.91400 0.42520-0.32967 0.57851-0.25475
  -3   2  15    0.07    1.81   0 0.70832-0.91128 0.42380-0.32736 0.57726 0.24050
  -3   3   5   10.19    1.66   0 0.70588-0.91337 0.42564-0.28302 0.57890-0.30946
  -3   5   4  584.95    3.77   0 0.71288-0.92100 0.42034-0.18287 0.57417-0.35925
  -3   8   3   89.04    2.05   0 0.70542-0.91342 0.42598-0.04670 0.57921-0.41788
  -3   9   3  111.77    2.25   0 0.70645-0.91466 0.42521 0.00116 0.57852-0.41729
  -3  10   3   11.29    1.73   0 0.70572-0.91320 0.42576 0.04706 0.57901-0.41738
  -3  11   3  117.84    2.29   0 0.70015-0.90837 0.42990 0.09030 0.58270-0.42042
  -3  12   4    0.29    1.30   0 0.72041-0.92698 0.41453 0.15284 0.56896-0.35404
  -3  13   4   35.53    1.90   0 0.71039-0.91734 0.42224 0.19291 0.57587-0.35919
  -3  14   5    4.01    1.36   0 0.71921-0.92523 0.41546 0.24686 0.56980-0.29800
  -3  15   5   14.03    1.86   0 0.70612-0.91177 0.42545 0.28292 0.57874-0.30710
  -3  15   6    2.27    1.29   0 0.72101-0.92604 0.41407 0.29641 0.56854-0.24203
  -3  16   6   -0.76    1.93   0 0.70588-0.91030 0.42564 0.33216 0.57890-0.25495
  -2  -2   8    0.43    1.59   0 0.70651-0.84551 0.42516-0.52186 0.57848-0.13958
  -2  -2  13    7.47    1.69   0 0.71530-0.84753 0.41849-0.51259 0.57251 0.13579
  -2  -2  14   -0.84    1.84   0 0.70312-0.83421 0.42770-0.51929 0.58074 0.18113
  -2  -1   6    6.40    1.41   0 0.72221-0.85952 0.41313-0.45943 0.56770-0.24342
  -2  -1  15    0.47    1.35   0 0.71861-0.84889 0.41593-0.46248 0.57022 0.24854
  -2   6   1  652.83    4.70   0 0.70820-0.84779 0.42389-0.13890 0.57734-0.52501
  -2   7   1  251.73    2.86   0 0.72101-0.86034 0.41407-0.08189 0.56854-0.51604
  -2  11   1    1.93    1.17   0 0.71741-0.85622 0.41686 0.10388 0.57105-0.51749
  -2  12   1    5.61    1.82   0 0.70762-0.84616 0.42433 0.14393 0.57773-0.52411
  -2  14   2   13.95    1.31   0 0.72011-0.85787 0.41477 0.24715 0.56917-0.46066
  -2  15   2    1.51    1.60   0 0.70338-0.84053 0.42751 0.28255 0.58057-0.47191
  -2  16   3    2.03    1.32   0 0.71500-0.85132 0.41872 0.33913 0.57272-0.40926
  -2  17   4   13.60    1.52   0 0.71861-0.85507 0.41593 0.38909 0.57022-0.35075
  -1  -4   7    7.35    2.16   0 0.69545-0.76145 0.43335-0.62161 0.58576-0.20500
  -1  -4  14    0.50    1.71   0 0.70649-0.76688 0.42518-0.61333 0.57849 0.18593
  -1  -3   5   25.68    2.67   0 0.69457-0.76192 0.43400-0.57487 0.58633-0.31554
[truncated: 1,718,528 more chars]
